# Supplementary material
Source: PubMed Central journal article supplement (PMC5385518)
Supplement: jp7b00197_si_001.pdf [file jp7b00197_si_001.pdf]

# Excited-State Decay Paths in Tetraphenylethene Derivatives

## Supporting Information

Yuan-Jun Gao<sup>¶</sup>, Xue-Ping Chang<sup>¶</sup>, Xiang-Yang Liu<sup>¶</sup>, Quan-Song Li<sup>§</sup>, Ganglong Cui<sup>¶\*</sup>, Walter Thiel<sup>†\*</sup>

<sup>¶</sup>Key Laboratory of Theoretical and Computational Photochemistry, Ministry of Education, College of Chemistry, Beijing Normal University, Beijing 100875, P.R. China; <sup>§</sup>School of Chemistry and Chemical Engineering, Beijing Institute of Technology, Beijing 100081, China; and <sup>†</sup>Max-Planck-Institut für Kohlenforschung, Kaiser-Wilhelm-Platz 1, D-45470 Mülheim an der Ruhr, Germany

### Contents

1. Optimized Structures
2. Active Orbitals
3. Tables
4. LIIC Paths
5. Typical Trajectory of TPE-4oM
6. Product Analysis
7. Transition States for S<sub>0</sub> Cyclization
8. Overlaps Between S<sub>0</sub> Minima and Cyclic S<sub>1</sub>/S<sub>0</sub> Conical Intersections
9. Cartesian Coordinates

## List of Figures

- S1** Geometric structures of TPE-4mM and TPE-4oM optimized at the CASSCF/6-31G\* level (carbon atoms in gray and hydrogen atoms in white). Selected bond lengths are given in Å and dihedral angles are given in degree. Also shown is the atomic numbering. ....5
- S2** Geometric structures of TPE-4mM and TPE-4oM optimized at the OM2/MRCI level. Selected bond lengths are given in Å and dihedral angles are given in degree. Also shown is the atomic numbering. ....6
- S3** (a) Overlays of the OM2/MRCI(12,12) and CASSCF/6-31G\* optimized  $S_0$  and  $S_1$  structures of TPE-4mM (top) and TPE-4oM (bottom), respectively. (b) Overlays of the OM2/MRCI(12,12) and CASSCF/3-21G optimized  $S_1S_0$  conical intersection structures of TPE-4mM (top) and TPE-4oM (bottom), respectively. ....7
- S4** Active-space orbitals in the CASPT2 calculations: (a) TPE-4mM, (b) TPE-4oM. ....8
- S5** Active-space orbitals in the OM2/MRCI calculations: (a) TPE-4mM, (b) TPE-4oM. ....9
- S6** OM2/MRCI and CASPT2 profiles computed along linearly interpolated internal coordinate (LIIC) paths connecting the optimized OM2/MRCI structures of the  $S_0$  minimum (i.e. the Franck-Condon point) and of the relevant conical intersections: (a) TPE-4mM, (b) TPE-4oM. .... 14
- S7** Time-dependent physical variables obtained from typical OM2/MRCI trajectory of TPE-4oM: two key bond lengths (top-left);  $S_1$ - $S_0$  energy gap (top-right); six key dihedral angles (bottom). .... 16
- S8** Distribution of the key C4C5 (left) and C8C9 (right) distances for TPE-

|            |                                                                                                                                                                                                                              |    |
|------------|------------------------------------------------------------------------------------------------------------------------------------------------------------------------------------------------------------------------------|----|
|            | 4mM at the end of 1 ps simulations. Hops via S <sub>1</sub> S <sub>0</sub> -cyc (C4C5) [S <sub>1</sub> S <sub>0</sub> -cyc (C8C9)] are shown in green [blue].                                                                | 16 |
| <b>S9</b>  | Transition-state structures of TPE-4mM and TPE-4oM optimized at the B3LYP level.                                                                                                                                             | 17 |
| <b>S10</b> | Overlays of OM2/MRCI optimized S <sub>0</sub> and (top) S <sub>1</sub> /S <sub>0</sub> -cyc (C4C5) and (bottom) S <sub>1</sub> /S <sub>0</sub> -cyc (C8C9) conical intersection structures of TPE-4mM from different angles. | 18 |
| <b>S11</b> | Overlays of OM2/MRCI optimized S <sub>0</sub> and (top) S <sub>1</sub> /S <sub>0</sub> -cyc (C4C5) and (bottom) S <sub>1</sub> /S <sub>0</sub> -cyc (C8C9) conical intersection structures of TPE-4oM from different angles. | 19 |

## List of Tables

- S1** Vertical excitation energies ( $E_{\perp}$ , kcal/mol), oscillator strengths ( $f$ ), and singly occupied orbitals involved in the  $S_0 \rightarrow S_1$  ( $1\pi\pi^*$ ) electronic transition of TPE-4mM and TPE-4oM in the gas phase, computed at the TD-B3LYP, TD-CAM-B3LYP, TD- $\omega$ B-97XD, OM2/MRCI, and CASPT2 levels, respectively. Orbitals were plotted using Chemcraft. .... 10
- S2** Selected geometric parameters of the optimized structures of TPE-4mM and TPE-4oM. .... 11
- S3** Relative energies (kcal/mol) of the optimized structures for TPE-4mM and TPE-4oM. .... 12
- S4** Relative energies (kcal/mol) of the OM2/MRCI and B3LYP optimized ground-state structures for TPE-4mM and TPE-4oM. .... 12
- S5** Vertical excitation energies (kcal/mol) of  $S_0$ -cyclic for TPE-4mM and TPE-4oM, computed by TD-B3LYP, TD-CAM-B3LYP and OM2/MRCI methods, respectively. .... 12
- S6** Relative energies (kcal/mol) of B3LYP optimized ground-state structures for TPE-4mM and TPE-4oM. .... 17

## 1. Optimized Structures

Figures S1 and S2 show the ground- and excited-state minima of TPE-4mM and TPE-4oM optimized by the CASSCF and OM2/MRCI methods, respectively. In the present nonadiabatic dynamics simulations, we use OM2/MRCI calculations with an active space of twelve electrons distributed over twelve orbitals. This approach provides accurate structures for the  $S_0$  and  $S_1$  minima and the  $S_1/S_0$  conical intersections of TPE-4mM and TPE-4oM, which are close to those obtained by the CASSCF method, as is evident from overlays of the corresponding optimized geometries (Fig. S3). It also gives reasonably accurate energies compared with those computed at the CASPT2(10,8)/6-31G\* level.

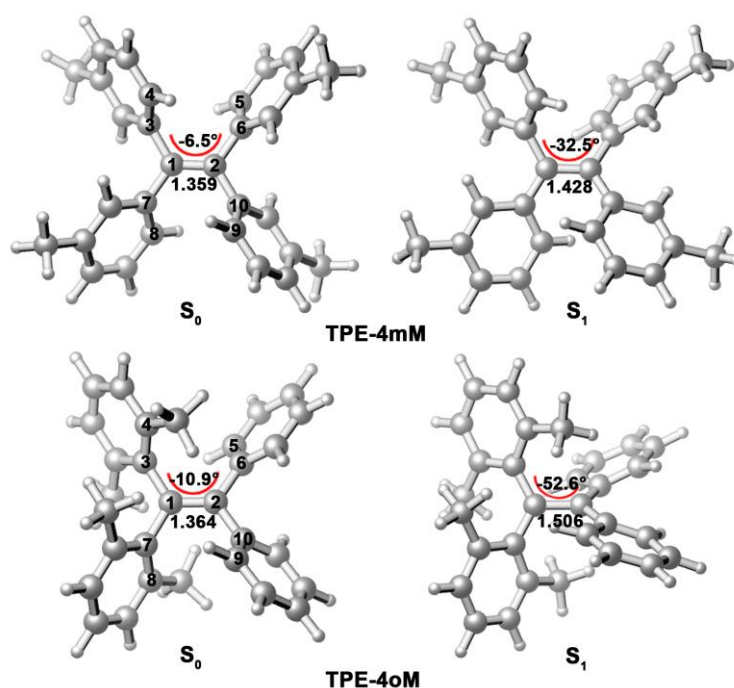

**Figure S1:** Geometric structures of TPE-4mM and TPE-4oM optimized at the CASSCF/6-31G\* level (carbon atoms in gray and hydrogen atoms in white). Selected bond lengths are given in Å and dihedral angles are given in degree. Also shown is the atomic numbering.

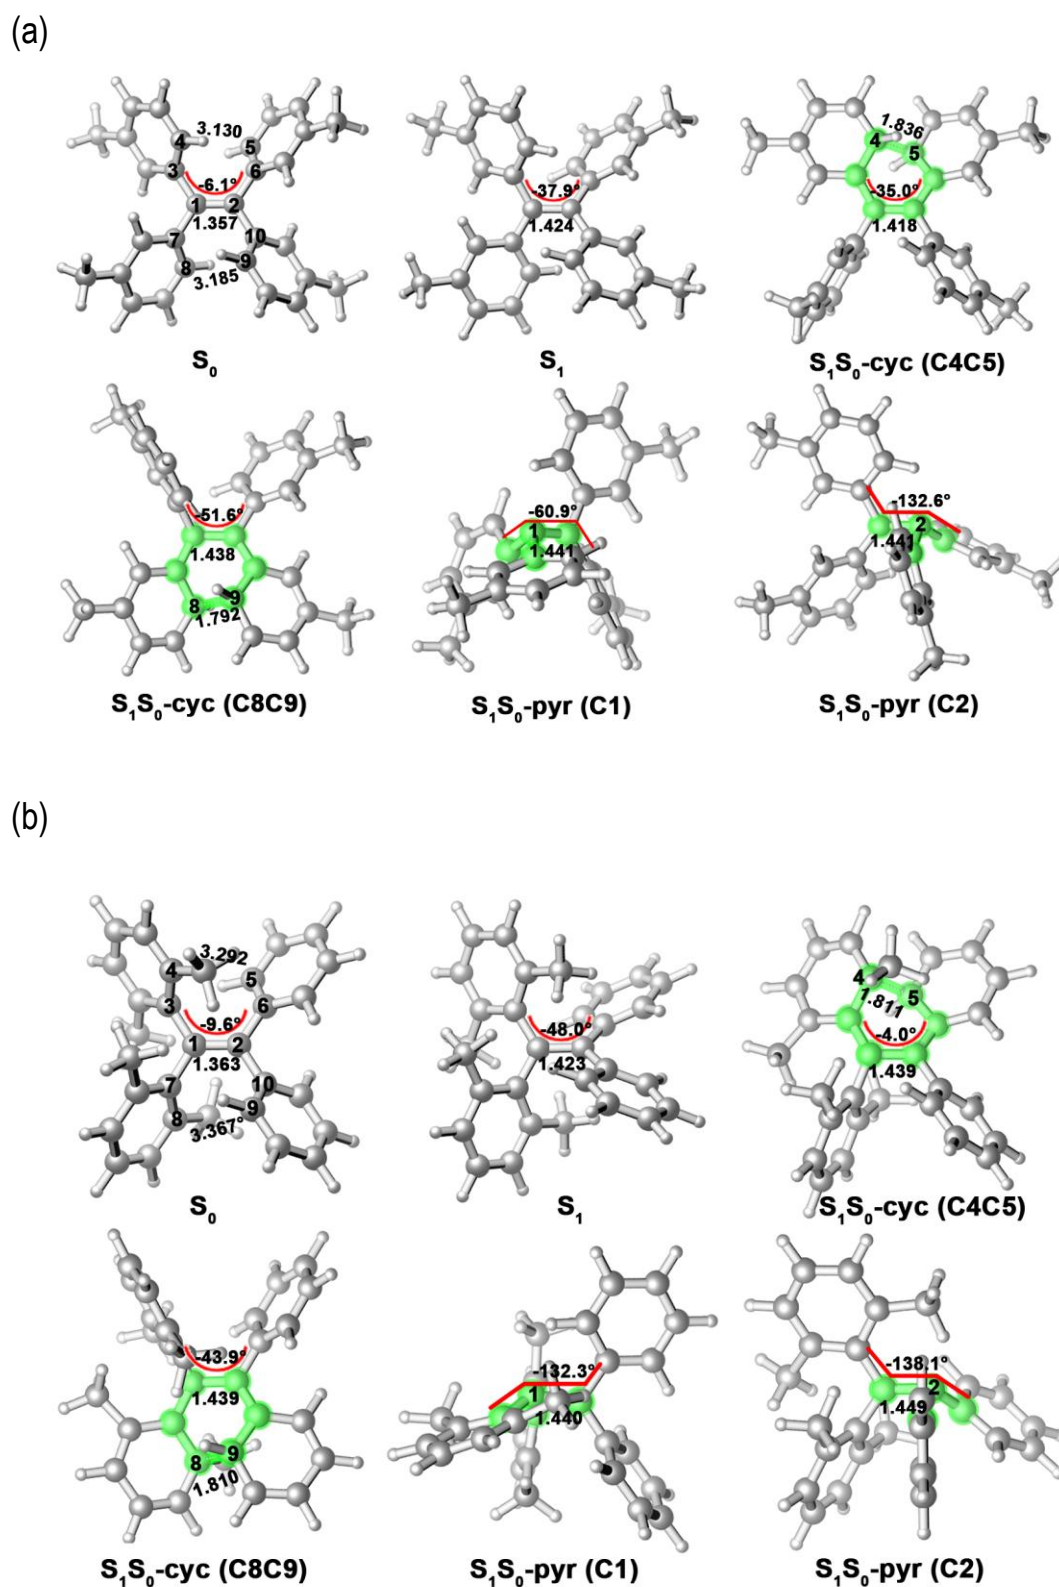

**Figure S2:** Geometric structures of TPE-4mM (a) and TPE-4oM (b) optimized at the OM2/MRCI level. Selected bond lengths are given in Å and dihedral angles are given in degree. Also shown is the atomic numbering.

(a)

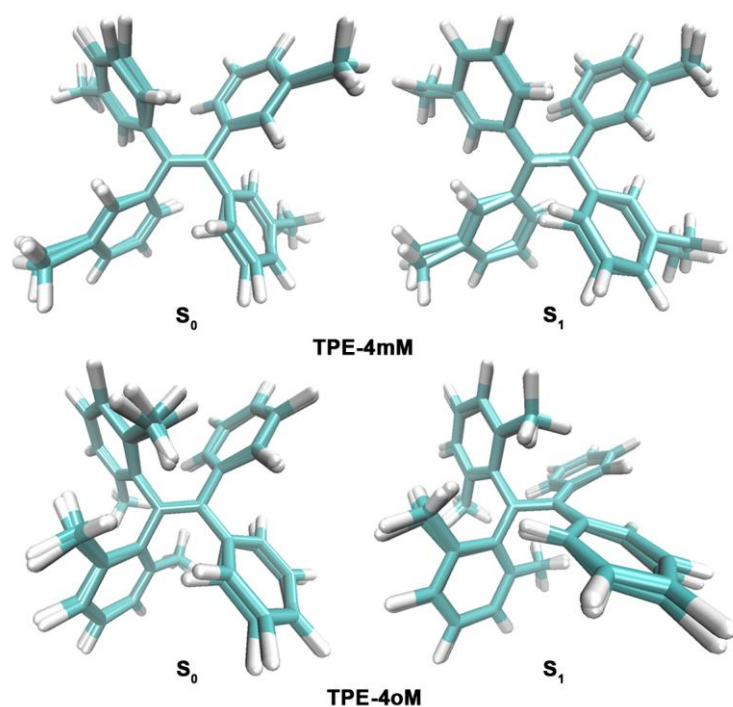

(b)

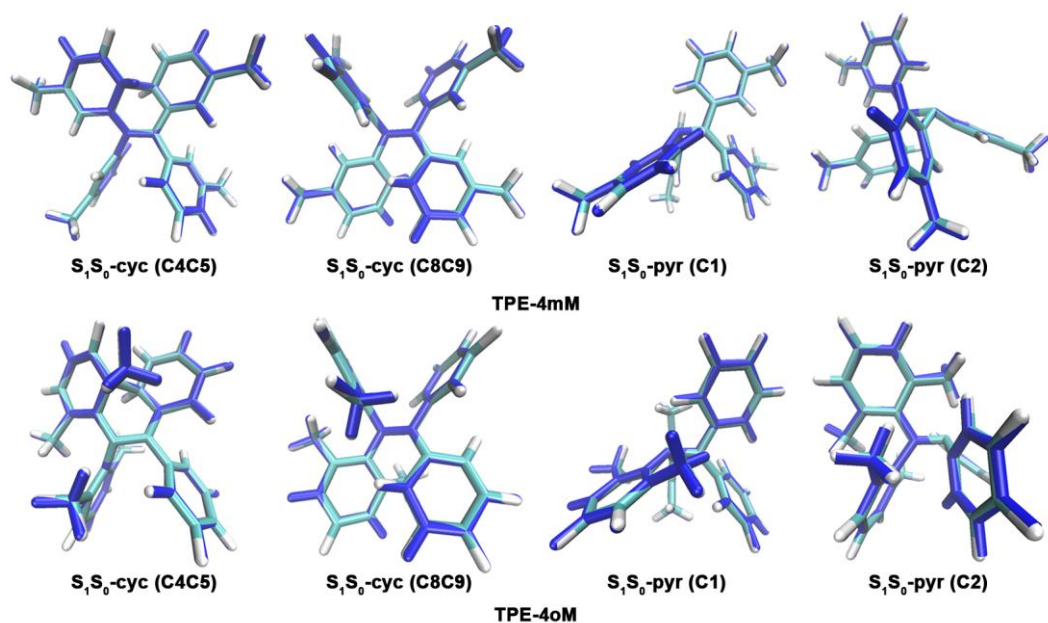

**Figure S3:** (a) Overlays of the OM2/MRCI and CASSCF optimized  $S_0$  and  $S_1$  structures of TPE-4mM (top) and TPE-4oM (bottom), respectively. (b) Overlays of the OM2/MRCI and CASSCF optimized  $S_1S_0$  conical intersection structures of TPE-4mM (top) and TPE-4oM (bottom), respectively.



## 2. Active Orbitals

(a)

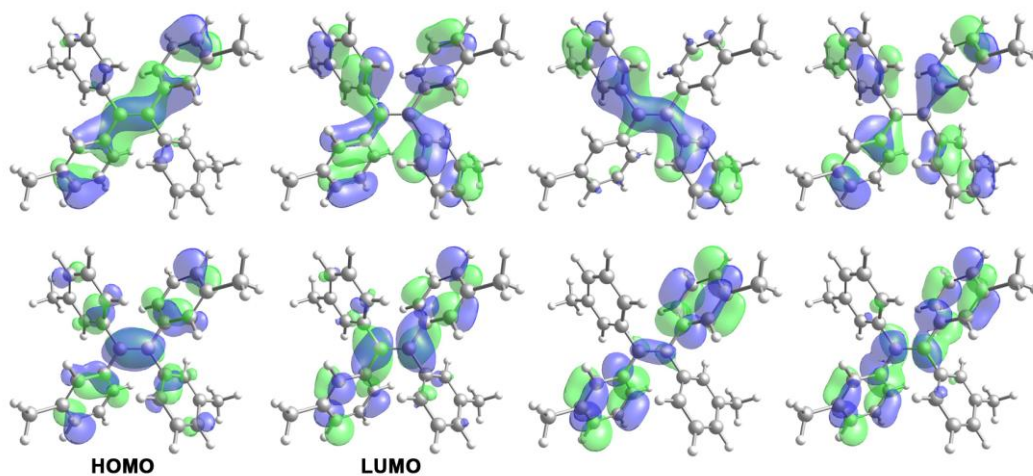

(b)

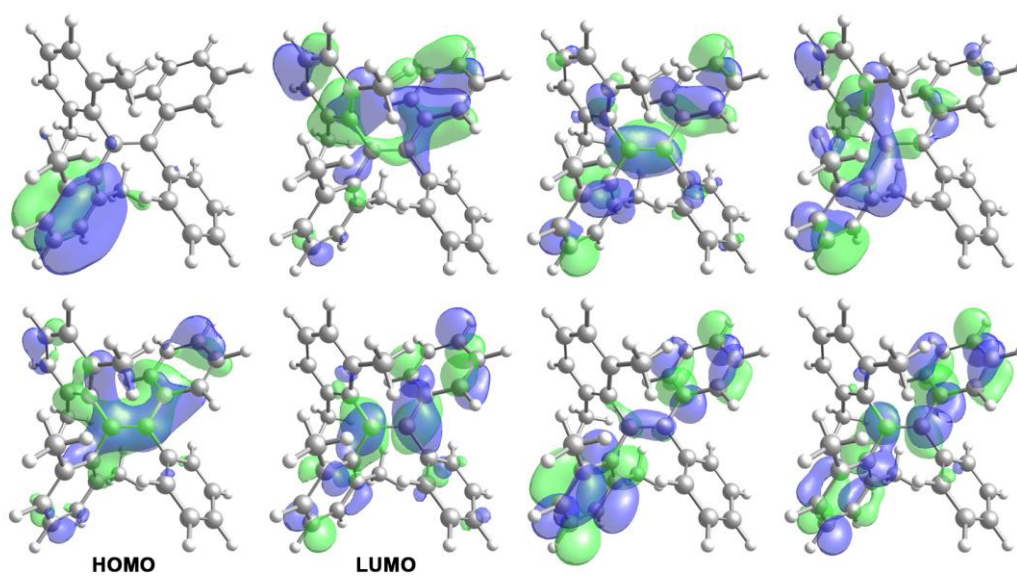

**Figure S4:** Active-space orbitals in the CASPT2 calculations for (a) TPE-4mM, (b) TPE-4oM.



(a)

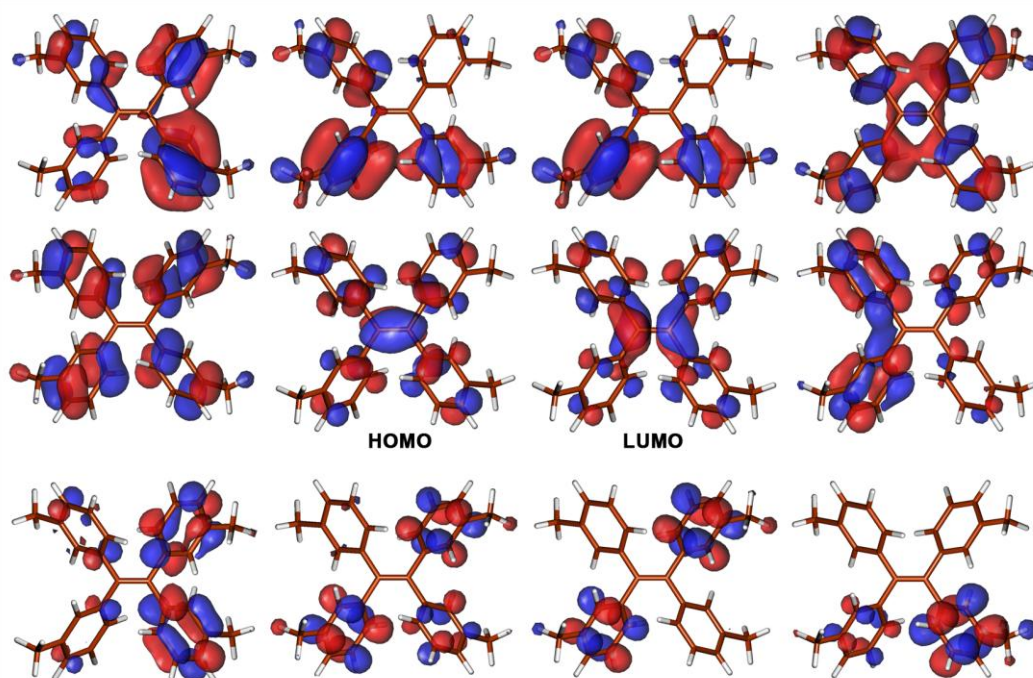

(b)

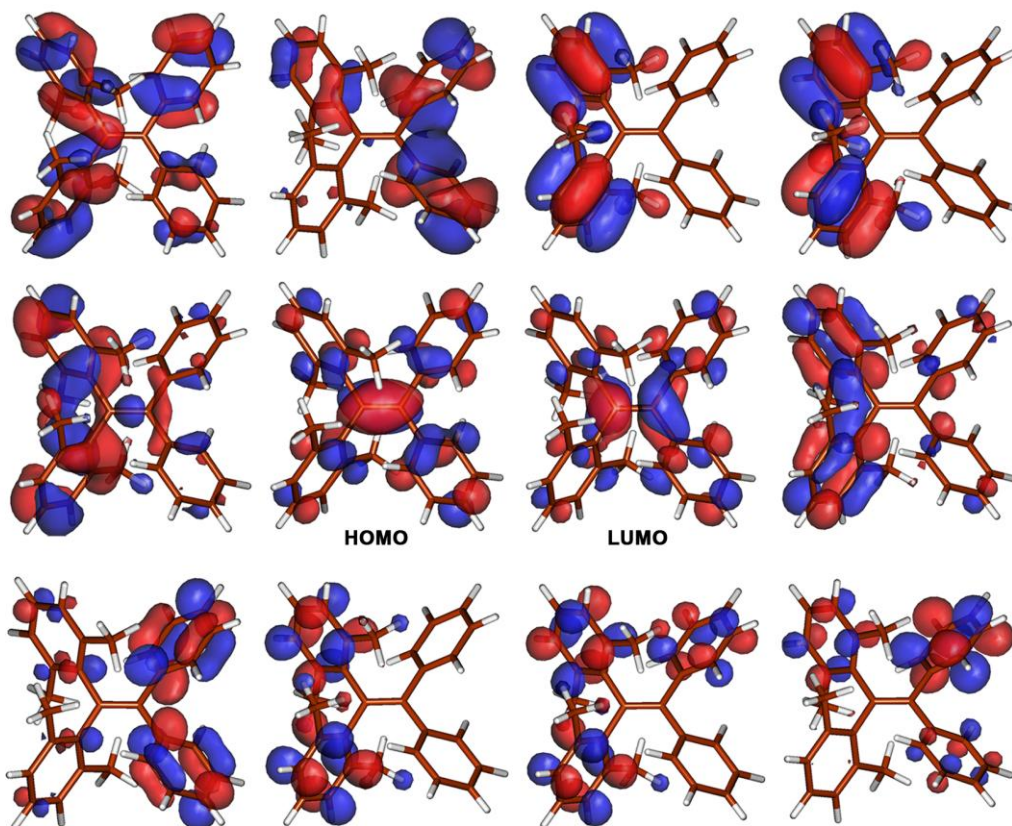

**Figure S5:** Active-space orbitals in the OM2/MRCI calculations for (a) TPE-4mM, (b) TPE-4oM.

### 3. Tables

**Table S1.** Vertical Excitation Energies ( $E_{\perp}$ , kcal/mol ), Oscillator Strengths ( $f$ ), and Singly Occupied Orbitals Involved in the  $S_0 \rightarrow S_1$  ( ${}^1\pi\pi^*$ ) Electronic Transitions of TPE-4mM and TPE-4oM in the Gas Phase, Computed by TD-B3LYP, TD-CAM-B3LYP, TD- $\omega$ B97XD, OM2/MRCI, and CASPT2 Methods, respectively.

| <b>S<sub>0</sub>-TPE-4mM</b>       | <b>E<sub>⊥</sub></b> | <b>f</b> | <b>Singly occupied orbitals</b>                                                      |                                                                                       |
|------------------------------------|----------------------|----------|--------------------------------------------------------------------------------------|---------------------------------------------------------------------------------------|
| <b>TD-B3LYP</b>                    | 84.5 (3.7 eV)        | 0.4006   | 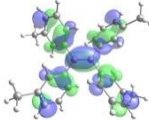   |    |
| <b>TD-CAM-B3LYP</b>                | 97.9 (4.2 eV)        | 0.4912   |    |    |
| <b>TD-<math>\omega</math>B97XD</b> | 99.2 (4.2 eV)        | 0.4896   |    |    |
| <b>OM2/MRCI</b>                    | 101.1 (4.4 eV)       | 0.3852   |   |   |
| <b>CASPT2</b>                      | 96.9 (4.2 eV)        | 0.7444   |  |  |
| <b>S<sub>0</sub>-TPE-4oM</b>       | <b>E<sub>⊥</sub></b> | <b>f</b> | <b>Singly occupied orbitals</b>                                                      |                                                                                       |
| <b>TD-B3LYP</b>                    | 85.6 (3.7 eV)        | 0.3055   |  |  |
| <b>TD-CAM-B3LYP</b>                | 98.9 (4.3 eV)        | 0.3929   |  |  |
| <b>TD-<math>\omega</math>B97XD</b> | 98.9 (4.3 eV)        | 0.3830   |  |  |
| <b>OM2/MRCI</b>                    | 101.6 (4.4 eV)       | 0.3774   |  |  |
| <b>CASPT2</b>                      | 101.7 (4.4 eV)       | 0.4569   |  |  |

**Table S2.** Selected Geometric Parameters of the Optimized OM2/MRCI Structures of TPE-4mM and TPE-4oM (see Fig. S1 for Atom Numbering).

| Structures |                                               | Distance (Å) |       |       | Dihedral angle (°) |               |
|------------|-----------------------------------------------|--------------|-------|-------|--------------------|---------------|
|            |                                               | C1C2         | C4C5  | C8C9  | Pyramidalization   |               |
|            |                                               |              |       |       | C2C3C7C<br>1       | C1C10C6C<br>2 |
| TPE-4mM    | S <sub>0</sub>                                | 1.357        | 3.130 | 3.185 | -0.2               | -0.3          |
|            | S <sub>1</sub>                                | 1.426        | 3.096 | 3.094 | -0.2               | -0.1          |
|            | S <sub>1</sub> S <sub>0</sub> <sup>C4C5</sup> | 1.418        | 1.836 | 4.175 | -11.1              | -0.4          |
|            | S <sub>1</sub> S <sub>0</sub> <sup>C8C9</sup> | 1.438        | 4.201 | 1.794 | -27.1              | -0.2          |
|            | S <sub>1</sub> S <sub>0</sub> <sup>C1</sup>   | 1.441        | 4.561 | 4.284 | 43.5               | -4.3          |
|            | S <sub>1</sub> S <sub>0</sub> <sup>C2</sup>   | 1.441        | 4.297 | 4.550 | -4.2               | 43.2          |
|            | S <sub>0</sub> -cyclic <sup>C4C5</sup>        | 1.444        | 1.532 | 4.323 | -0.1               | 0.2           |
|            | S <sub>0</sub> -cyclic <sup>C8C9</sup>        | 1.444        | 4.405 | 1.532 | 0.4                | -0.2          |
| TPE-4oM    | S <sub>0</sub>                                | 1.363        | 3.292 | 3.337 | -0.1               | -0.3          |
|            | S <sub>1</sub>                                | 1.423        | 3.571 | 3.576 | -0.1               | -0.2          |
|            | S <sub>1</sub> S <sub>0</sub> <sup>C4C5</sup> | 1.439        | 1.811 | 3.959 | 28.3               | 1.8           |
|            | S <sub>1</sub> S <sub>0</sub> <sup>C8C9</sup> | 1.439        | 3.961 | 1.810 | -28.3              | -1.8          |
|            | S <sub>1</sub> S <sub>0</sub> <sup>C1</sup>   | 1.440        | 4.104 | 4.953 | -42.0              | 3.5           |
|            | S <sub>1</sub> S <sub>0</sub> <sup>C2</sup>   | 1.449        | 4.453 | 4.989 | -5.7               | 40.5          |
|            | S <sub>0</sub> -cyclic <sup>C4C5</sup>        | 1.455        | 1.542 | 4.741 | 2.4                | -0.7          |
|            | S <sub>0</sub> -cyclic <sup>C8C9</sup>        | 1.455        | 4.734 | 1.542 | -2.3               | 0.6           |

| Structures |                                               | Dihedral angle (°) |                 |          |          |           |
|------------|-----------------------------------------------|--------------------|-----------------|----------|----------|-----------|
|            |                                               | EZ <sup>a</sup>    | IR <sup>b</sup> |          |          |           |
|            |                                               | C3C1C2C6           | C2C1C3C4        | C2C1C7C8 | C1C2C6C5 | C1C2C10C9 |
| TPE-4mM    | S <sub>0</sub>                                | -6.1               | -47.3           | -48.9    | -49.6    | -51.3     |
|            | S <sub>1</sub>                                | -37.9              | -25.9           | -25.9    | -26.0    | -26.0     |
|            | S <sub>1</sub> S <sub>0</sub> <sup>C4C5</sup> | -35.0              | 19.7            | -87.4    | -13.4    | -57.7     |
|            | S <sub>1</sub> S <sub>0</sub> <sup>C8C9</sup> | -51.6              | -65.7           | -31.7    | -38.5    | -11.8     |
|            | S <sub>1</sub> S <sub>0</sub> <sup>C1</sup>   | -60.9              | -84.9           | 43.1     | -54.0    | -0.2      |
|            | S <sub>1</sub> S <sub>0</sub> <sup>C2</sup>   | -132.6             | -0.7            | -53.3    | 43.0     | -84.2     |
|            | S <sub>0</sub> -cyclic <sup>C4C5</sup>        | -10.5              | -5.3            | -84.8    | -4.9     | -85.7     |
|            | S <sub>0</sub> -cyclic <sup>C8C9</sup>        | -10.1              | -87.9           | -5.7     | -88.3    | -5.9      |
| TPE-4oM    | S <sub>0</sub>                                | -9.6               | -60.5           | -60.5    | -39.5    | -46.2     |
|            | S <sub>1</sub>                                | -48.0              | -39.9           | -40.0    | -22.1    | -21.8     |
|            | S <sub>1</sub> S <sub>0</sub> <sup>C4C5</sup> | -4.0               | -36.8           | -58.9    | -7.7     | -44.4     |
|            | S <sub>1</sub> S <sub>0</sub> <sup>C8C9</sup> | -43.9              | -59.0           | -36.8    | -44.4    | -7.7      |
|            | S <sub>1</sub> S <sub>0</sub> <sup>C1</sup>   | -132.3             | 46.8            | -99.0    | 23.2     | -77.3     |
|            | S <sub>1</sub> S <sub>0</sub> <sup>C2</sup>   | -138.1             | -1.8            | -72.6    | 69.2     | -102.2    |
|            | S <sub>0</sub> -cyclic <sup>C4C5</sup>        | -11.4              | -3.2            | -92.7    | -5.7     | -105.8    |
|            | S <sub>0</sub> -cyclic <sup>C8C9</sup>        | -16.1              | -92.6           | -3.0     | -105.5   | -5.6      |

Notes: <sup>a</sup>: E-Z isomerization; <sup>b</sup>: Intramolecular rotation

**Table S3.** OM2/MRCI and CASPT2 Refined Relative Energies (kcal/mol) of the OM2/MRCI and CASSCF Optimized Structures for TPE-4mM and TPE-4oM.

|         | Structure                                     | OM2/MRCI  | CASPT2 // OM2/MRCI | CASPT2 // CASSCF |
|---------|-----------------------------------------------|-----------|--------------------|------------------|
| TPE-4mM | S <sub>0</sub>                                | 0.0       | 0.0                | 0.0              |
|         | S <sub>1</sub>                                | 79.7      | 76.0               | 79.3             |
|         | S <sub>1</sub> S <sub>0</sub> <sup>C4C5</sup> | 79.4/79.4 | 75.1/89.0          | 72.0/81.7        |
|         | S <sub>1</sub> S <sub>0</sub> <sup>C8C9</sup> | 79.9/79.9 | 76.8/88.0          | 71.5/82.7        |
|         | S <sub>1</sub> S <sub>0</sub> <sup>C1</sup>   | 80.7/80.7 | 89.5/91.5          | 89.5/90.9        |
|         | S <sub>1</sub> S <sub>0</sub> <sup>C2</sup>   | 80.7/80.7 | 89.6/91.5          | 89.5/91.5        |
| TPE-4oM | S <sub>0</sub>                                | 0.0       | 0.0                | 0.0              |
|         | S <sub>1</sub>                                | 80.6      | 84.8               | 86.6             |
|         | S <sub>1</sub> S <sub>0</sub> <sup>C4C5</sup> | 88.0/88.0 | 89.4/99.4          | 78.9/86.3        |
|         | S <sub>1</sub> S <sub>0</sub> <sup>C8C9</sup> | 87.9/87.9 | 89.3/99.4          | 79.0/86.3        |
|         | S <sub>1</sub> S <sub>0</sub> <sup>C1</sup>   | 88.6/88.6 | 96.4/97.8          | 95.0/95.4        |
|         | S <sub>1</sub> S <sub>0</sub> <sup>C2</sup>   | 92.0/92.0 | 111.3/121.2        | 114.6/122.1      |

Note: There is generally reasonable agreement between the results from the different approaches. The discrepancies in the bottom line are not relevant mechanistically because they concern the highest-energy conical intersection.

**Table S4.** Relative Energies (kcal/mol) of OM2/MRCI and B3LYP Optimized Ground-State Structures for TPE-4mM and TPE-4oM.

|         | Structure                              | OM2/MRCI | B3LYP |
|---------|----------------------------------------|----------|-------|
| TPE-4mM | S <sub>0</sub>                         | 0.0      | 0.0   |
|         | S <sub>0</sub> -cyclic <sup>C4C5</sup> | 30.4     | 39.3  |
|         | S <sub>0</sub> -cyclic <sup>C8C9</sup> | 30.6     | 39.4  |
| TPE-4oM | S <sub>0</sub>                         | 0.0      | 0.0   |
|         | S <sub>0</sub> -cyclic <sup>C4C5</sup> | 33.8     | 42.6  |
|         | S <sub>0</sub> -cyclic <sup>C8C9</sup> | 33.8     | 42.6  |

**Table S5.** Vertical Excitation Energies (kcal/mol) of S<sub>0</sub>-cyclic for TPE-4mM and TPE-4oM, Computed by TD-B3LYP, TD-CAM-B3LYP and OM2/MRCI Methods, respectively.

|         | Structure                              | TD-B3LYP | TD-CAM-B3LYP | OM2/MRCI |
|---------|----------------------------------------|----------|--------------|----------|
| TPE-4mM | S <sub>0</sub> -cyclic <sup>C4C5</sup> | 49.8     | 56.5         | 62.1     |
|         | S <sub>0</sub> -cyclic <sup>C8C9</sup> | 49.8     | 56.5         | 60.4     |
| TPE-4oM | S <sub>0</sub> -cyclic <sup>C4C5</sup> | 57.5     | 65.2         | 63.0     |
|         | S <sub>0</sub> -cyclic <sup>C8C9</sup> | 55.8     | 62.9         | 63.3     |

#### **4. LIIC Paths**

Hundreds of trajectories are needed to gain statistically meaningful results in surface hopping dynamics simulations. For molecules of the size of TPE-4oM and TPE-4mM (58 atoms), this can be achieved by using the semi-empirical OM2/MRCI electronic structure method, which is efficient and normally provides results close to those from the high-level CASSCF (structures) and CASPT2 (energies) methods, as demonstrated in many previous applications. [29-38]

In the present case, the data in Figs. S1-S3 and Tables S1-S3 clearly show that the OM2/MRCI and CASSCF (CASPT2) methods predict similar optimized geometries (energies) for all relevant minima and conical intersections. In addition, OM2/MRCI and first-principles methods give similar vertical excitation energies for the lowest  $S_0 \rightarrow S_1$  electronic transition at the Franck-Condon points (see 1).

For further validation, we present OM2/MRCI and CASPT2 profiles along linearly interpolated internal coordinate (LIIC) paths that connect the OM2/MRCI optimized geometries of the  $S_0$  minima (i.e. Franck-Condon points) and of the relevant conical intersections in TPE-4mM and TPE-4oM (see Fig. 6). Evidently, the computed profiles are generally similar, indicating that OM2/MRCI and CASPT2//OM2/MRCI give similar topological structures for the  $S_1$  and  $S_0$  potential energy surfaces. We conclude that the OM2/MRCI method is suitable for simulating the photodynamics of TPE-4oM and TPE-4mM.

(a)

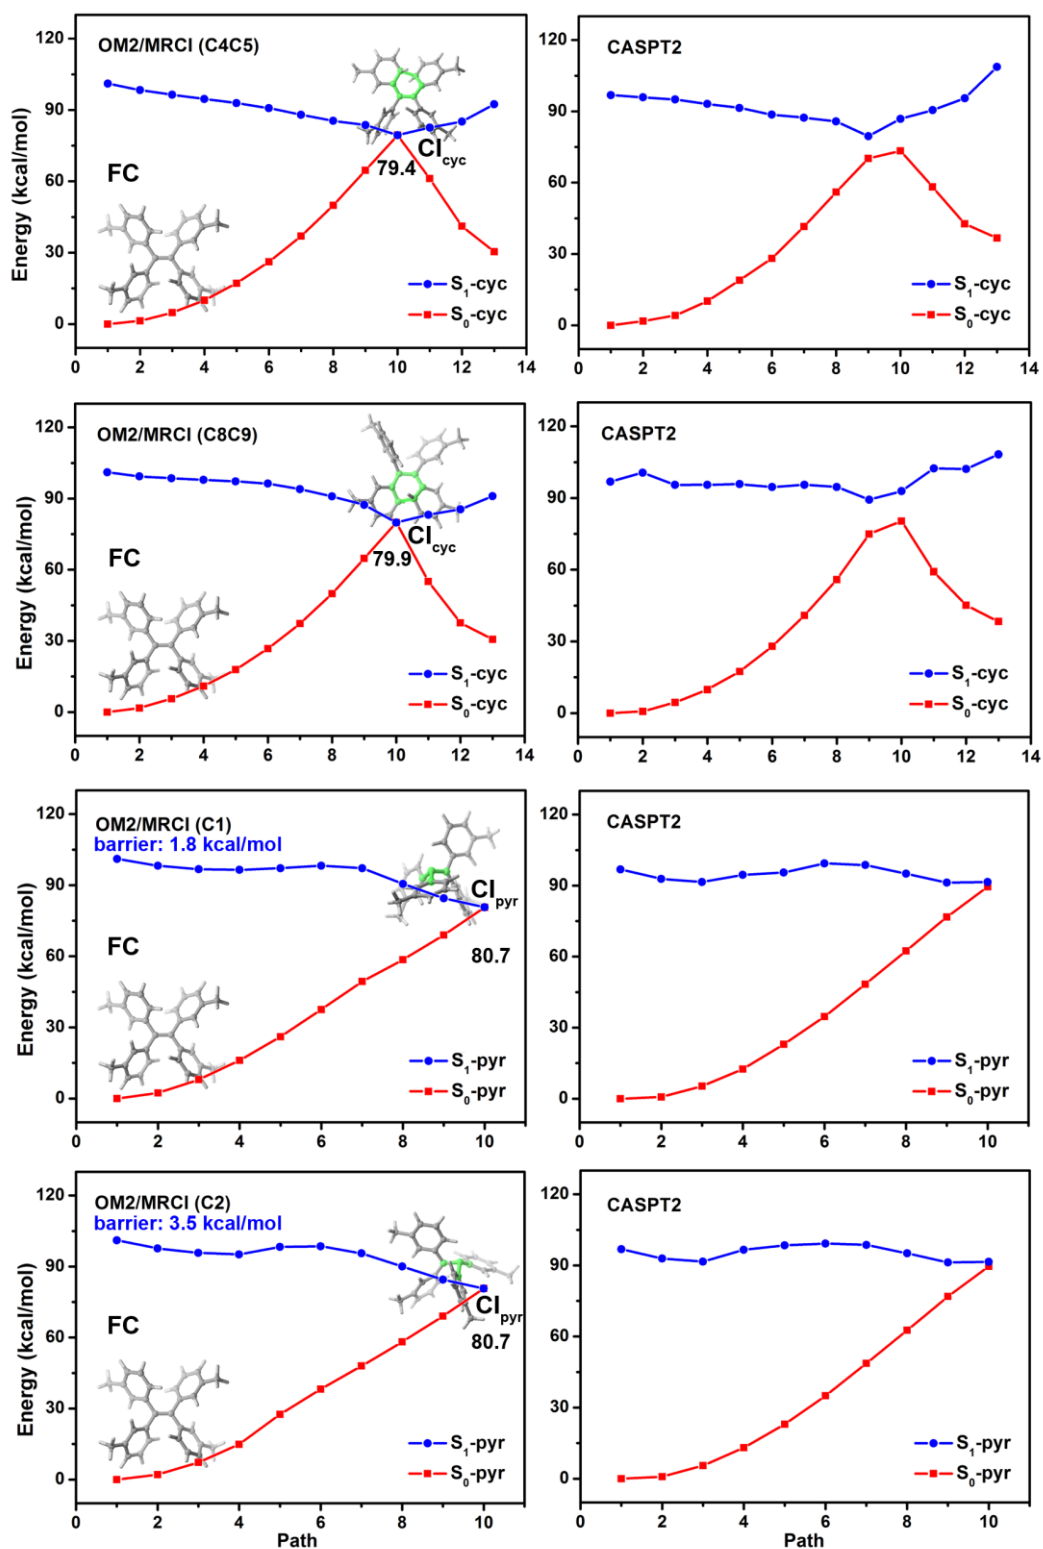



(b)

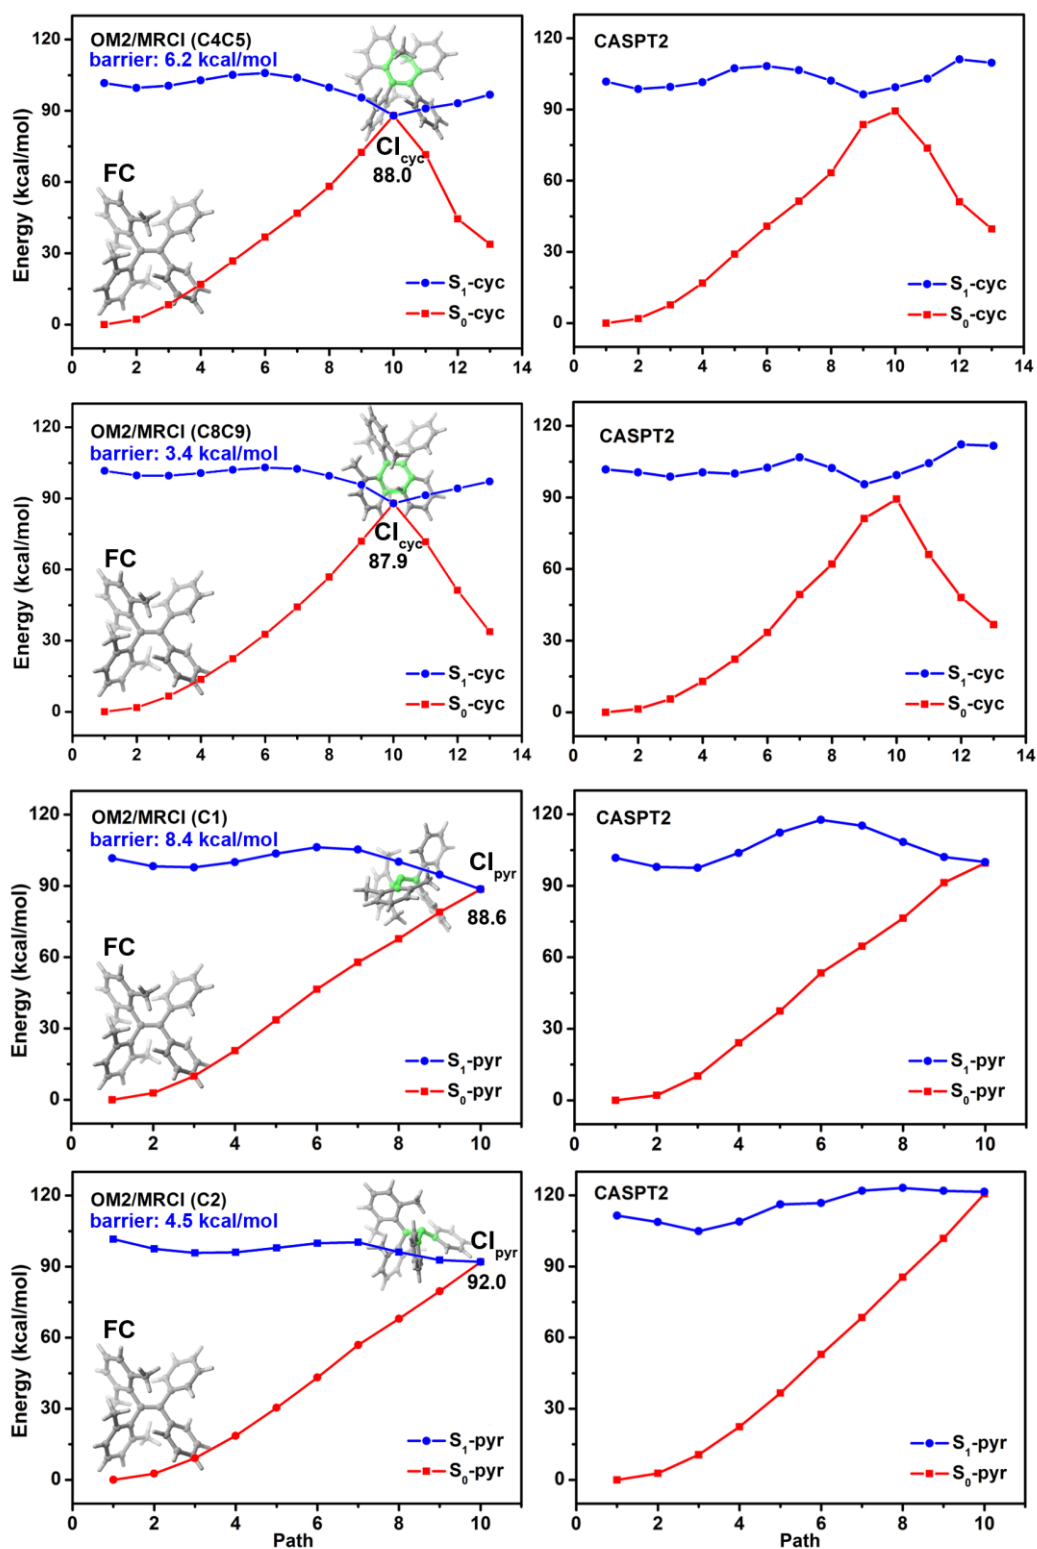

**Figure S6:** (left) OM2/MRCI and (right) CASPT2 re-computed reaction profiles along linearly interpolated internal coordinate (LIIC) paths connecting the optimized OM2/MRCI structures of the  $S_0$  minimum (i.e. Franck-Condon points) and of the relevant conical intersections: (a) TPE-4mM, (b) TPE-4oM.



## 5. Typical Trajectory of TPE-4oM

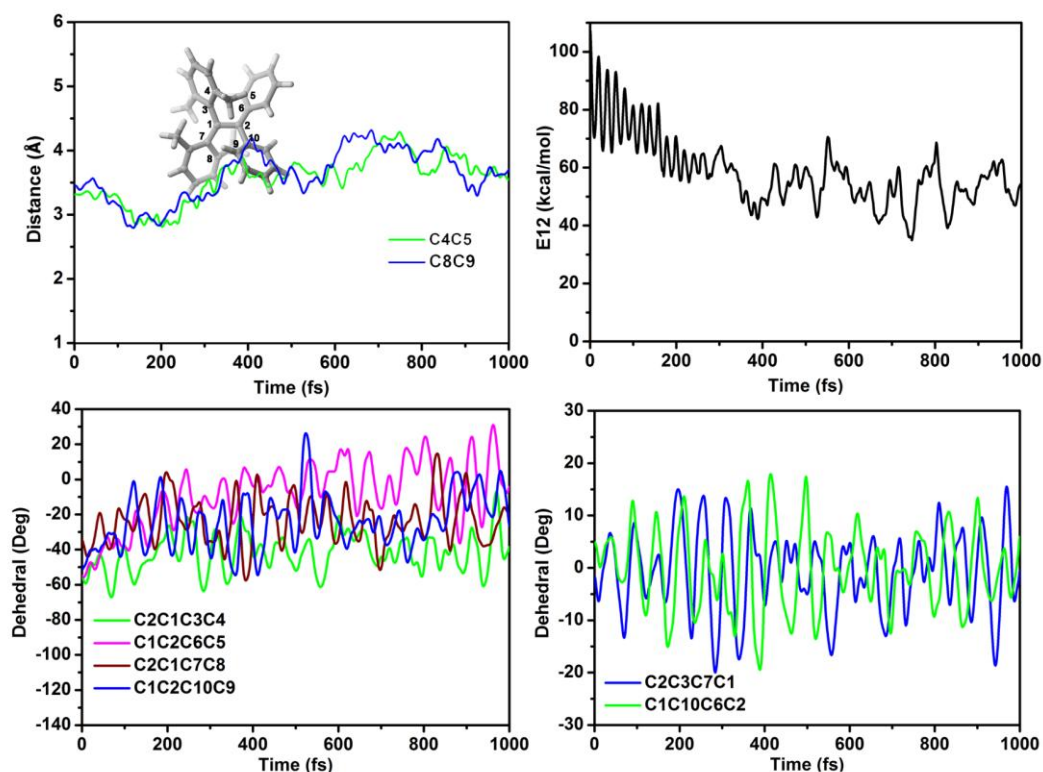

**Figure S7:** Time-dependent physical variables obtained from typical OM2/MRCI trajectory of TPE-4oM: two key bond lengths (top-left);  $S_1$ - $S_0$  energy gap (top-right); six key dihedral angles (bottom).

## 6. Product Analysis

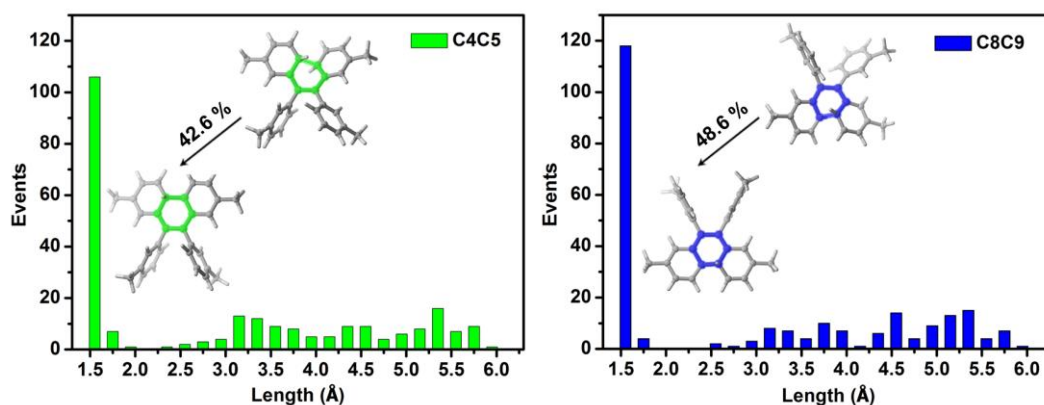

**Figure S8:** Distribution of the key C4C5 (left) and C8C9 (right) distances for TPE-4mM at the end of 1 ps simulations. Hops via  $S_1$ - $S_0$ -cyc (C4C5) [ $S_1$ - $S_0$ -cyc (C8C9)] are shown in green [blue].

## 7. Transition states

**Table S6.** Relative Energies (kcal/mol) of B3LYP Optimized Ground-State Structures for TPE-4mM and TPE-4oM.

| TPE-4mM | S <sub>0</sub> | TS-S <sub>0</sub> <sup>C4C5</sup> | S <sub>0</sub> -cyclic <sup>C4C5</sup> |
|---------|----------------|-----------------------------------|----------------------------------------|
| B3LYP   | 0.0            | 77.3                              | 39.3                                   |
| M06-2X  | 0.0            | 83.1                              | 36.6                                   |
| M06L    | 0.0            | 72.5                              | 37.0                                   |
| TPE-4mM | S <sub>0</sub> | TS-S <sub>0</sub> <sup>C8C9</sup> | S <sub>0</sub> -cyclic <sup>C8C9</sup> |
| B3LYP   | 0.0            | 77.3                              | 39.4                                   |
| M06-2X  | 0.0            | 83.1                              | 37.3                                   |
| M06L    | 0.0            | 72.5                              | 36.8                                   |
| TPE-4oM | S <sub>0</sub> | TS-S <sub>0</sub> <sup>C4C5</sup> | S <sub>0</sub> -cyclic <sup>C4C5</sup> |
| B3LYP   | 0.0            | 86.1                              | 42.6                                   |
| M06-2X  | 0.0            | 93.7                              | 39.8                                   |
| M06L    | 0.0            | 82.5                              | 43.1                                   |
| TPE-4oM | S <sub>0</sub> | TS-S <sub>0</sub> <sup>C8C9</sup> | S <sub>0</sub> -cyclic <sup>C8C9</sup> |
| B3LYP   | 0.0            | 86.1                              | 42.6                                   |
| M06-2X  | 0.0            | 93.7                              | 40.7                                   |
| M06L    | 0.0            | 82.5                              | 43.1                                   |

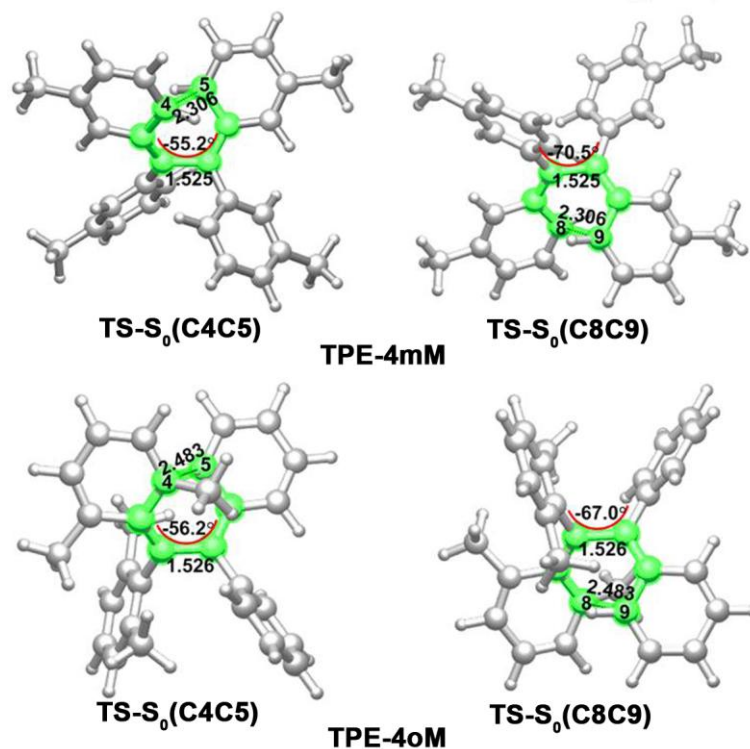

**Figure S9:** Transition-state structures of TPE-4mM and TPE-4oM optimized at the B3LYP level.

## 8. Overlaps between $S_0$ minima and cyclic $S_1/S_0$ conical intersections

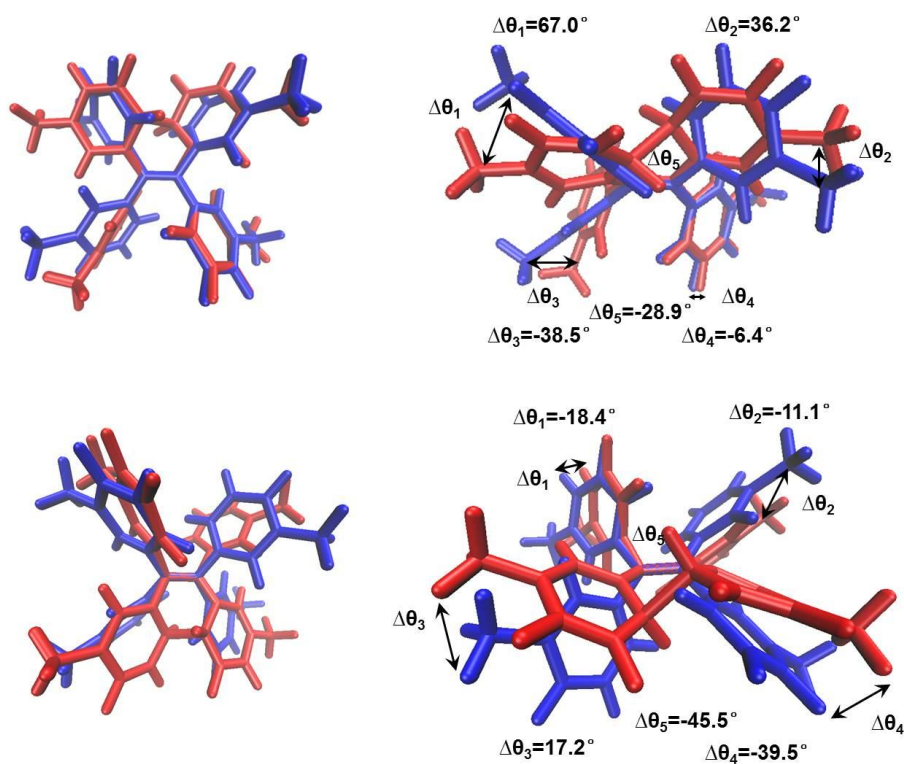

**Figure S10:** Overlays of OM2/MRCI optimized  $S_0$  and (top)  $S_1/S_0$ -cyc (C4C5) and (bottom)  $S_1/S_0$ -cyc (C8C9) conical intersection structures of TPE-4mM from different angles (left and right panels). Also shown are the differences of five key dihedral angles i.e.  $\theta_1$ (C2C1C3C4);  $\theta_2$ (C1C2C6C5);  $\theta_3$ (C2C1C7C8);  $\theta_4$ (C1C2C10C9);  $\theta_5$ (C3C1C2C6). See Figure S1 for atomic numbering and Table S2 for specific numbers of these dihedral angles.

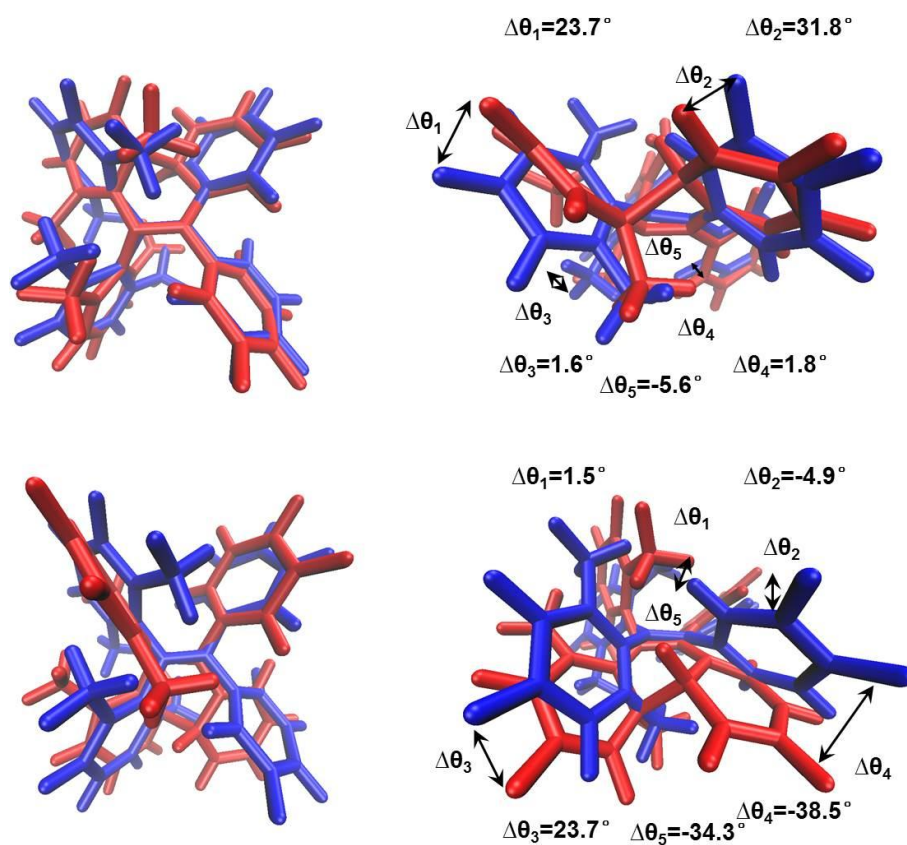

**Figure S11:** Overlays of OM2/MRCI optimized  $S_0$  and (top)  $S_1/S_0$ -cyc (C4C5) and (bottom)  $S_1/S_0$ -cyc (C8C9) conical intersection structures of TPE-4oM from different angles (left and right panels). Also shown are the differences of five key dihedral angles i.e.  $\theta_1$ (C2C1C3C4);  $\theta_2$ (C1C2C6C5);  $\theta_3$ (C2C1C7C8);  $\theta_4$ (C1C2C10C9);  $\theta_5$ (C3C1C2C6). See Figure S1 for atomic numbering and Table S2 for specific numbers of these dihedral angles.

## 9. Cartesian Coordinates

In xyz format (unit: Ångstrom)

### All structures including LIIC points

#### CASSCF method

TPE-4mM

S<sub>0</sub>

|   |             |             |             |
|---|-------------|-------------|-------------|
| C | 0.67404206  | 0.03799359  | 0.01071806  |
| C | -0.68454633 | 0.01632018  | -0.00267393 |
| C | 1.48492019  | -1.22849583 | 0.09264642  |
| C | 2.40125175  | -1.52728657 | -0.91135388 |
| C | 1.38589188  | -2.07532580 | 1.18549736  |
| C | 3.18738932  | -2.66841200 | -0.86256243 |
| H | 2.50379477  | -0.85077337 | -1.74193159 |
| C | 2.18008660  | -3.20954781 | 1.25838328  |
| H | 0.69003339  | -1.85505945 | 1.97423798  |
| C | 3.06773036  | -3.50669118 | 0.24201478  |
| H | 3.67844533  | -4.39079284 | 0.30856752  |
| C | -1.48060214 | -1.25362075 | -0.07968547 |
| C | -1.34221750 | -2.13854906 | -1.12947042 |
| C | -2.44078255 | -1.53459523 | 0.92415148  |
| C | -2.13180224 | -3.30544594 | -1.17627086 |
| H | -0.62767448 | -1.94766229 | -1.90847820 |
| C | -3.20145902 | -2.66883383 | 0.89153960  |
| H | -2.56974089 | -0.83119446 | 1.72791913  |
| C | -3.03364933 | -3.56573726 | -0.18956203 |
| H | -2.01456995 | -3.99036585 | -1.99742130 |
| H | -3.63304419 | -4.45939998 | -0.22973227 |
| C | 1.48670793  | 1.28919568  | -0.05217568 |
| C | 1.29928611  | 2.24044812  | -1.05922492 |
| C | 2.51303195  | 1.50423450  | 0.88698637  |
| C | 2.09969000  | 3.36407125  | -1.10795484 |
| H | 0.53149486  | 2.09905961  | -1.79681183 |
| C | 3.29880408  | 2.63441386  | 0.85781912  |
| H | 2.68382441  | 0.76578713  | 1.65073058  |
| C | 3.08765686  | 3.57442651  | -0.15832126 |
| H | 1.95082685  | 4.08682300  | -1.89137857 |
| H | 3.69900454  | 4.45908209  | -0.20531531 |
| C | -1.52505391 | 1.26695324  | 0.05990913  |
| C | -1.48059544 | 2.09863640  | 1.16329610  |
| C | -2.41255986 | 1.55979054  | -0.96969379 |
| C | -2.30146223 | 3.21686911  | 1.22349835  |
| H | -0.79859791 | 1.88971219  | 1.96735297  |

|   |             |             |             |
|---|-------------|-------------|-------------|
| C | -3.23009352 | 2.67982993  | -0.93027963 |
| H | -2.46895029 | 0.89785661  | -1.81669057 |
| C | -3.16369541 | 3.50745534  | 0.18582893  |
| H | -2.25958347 | 3.86242340  | 2.08303864  |
| H | -3.79283829 | 4.37964740  | 0.24154599  |
| C | -4.21416669 | -2.97765700 | 1.96897435  |
| H | -5.21151591 | -3.07756126 | 1.55056094  |
| H | -3.97872756 | -3.91187296 | 2.47096973  |
| H | -4.24470851 | -2.19528263 | 2.71804563  |
| C | 4.37990112  | 2.86386772  | 1.88894931  |
| H | 5.35316319  | 2.97057064  | 1.41867888  |
| H | 4.19353778  | 3.77151570  | 2.45604432  |
| H | 4.43898359  | 2.03999080  | 2.59081467  |
| C | -4.18475859 | 2.99105661  | -2.06042594 |
| H | -5.21681201 | 2.94238000  | -1.72539528 |
| H | -4.01699050 | 3.98989762  | -2.45171840 |
| H | -4.06992836 | 2.29004813  | -2.87892886 |
| H | 2.10293745  | -3.86124579 | 2.11061798  |
| C | 4.14505679  | -3.00101490 | -1.98368220 |
| H | 5.06985336  | -3.41879625 | -1.60033077 |
| H | 3.71297255  | -3.73276187 | -2.66123870 |
| H | 4.39229095  | -2.12028174 | -2.56505769 |

S<sub>1</sub>

|   |             |             |             |
|---|-------------|-------------|-------------|
| C | -0.71190620 | -0.08893080 | 0.04625810  |
| C | 0.71333678  | -0.08976118 | -0.04723036 |
| C | -1.42108516 | 1.15504806  | 0.45397055  |
| C | -2.51901142 | 1.65167763  | -0.29767194 |
| C | -1.01169602 | 1.88558204  | 1.55878992  |
| C | -3.17208547 | 2.80377476  | 0.04406507  |
| H | -2.83114781 | 1.10608358  | -1.17068054 |
| C | -1.68101773 | 3.06637257  | 1.92021767  |
| H | -0.18506076 | 1.53952502  | 2.15120606  |
| C | -2.73781965 | 3.51727318  | 1.18229096  |
| H | -3.24382044 | 4.42567057  | 1.46217714  |
| C | 1.42370533  | 1.15196968  | -0.45972403 |
| C | 1.01524869  | 1.87845028  | -1.56755130 |
| C | 2.52198357  | 1.65052616  | 0.29012630  |
| C | 1.68588833  | 3.05705349  | -1.93366449 |
| H | 0.18835122  | 1.53085270  | -2.15870195 |
| C | 3.17640803  | 2.80046910  | -0.05624180 |
| H | 2.83336748  | 1.10816325  | 1.16541479  |
| C | 2.74307632  | 3.50980244  | -1.19742687 |
| H | 1.36014487  | 3.60224892  | -2.80220554 |
| H | 3.25005195  | 4.41654700  | -1.48088767 |
| C | -1.46048551 | -1.26092746 | -0.23924453 |
| C | -0.88445041 | -2.35821612 | -0.96049588 |
| C | -2.78782478 | -1.46216348 | 0.25985915  |
| C | -1.59725288 | -3.55051570 | -1.13638229 |

|   |             |             |             |
|---|-------------|-------------|-------------|
| H | 0.01418787  | -2.20587478 | -1.51878824 |
| C | -3.46000738 | -2.63643924 | 0.09797022  |
| H | -3.24644816 | -0.67242652 | 0.82196990  |
| C | -2.84787398 | -3.70587240 | -0.61319920 |
| H | -1.14447567 | -4.34519334 | -1.70239276 |
| H | -3.38494415 | -4.62845173 | -0.74684532 |
| C | 1.46085025  | -1.26136407 | 0.24262774  |
| C | 0.88383191  | -2.35546134 | 0.96793985  |
| C | 2.78800228  | -1.46565484 | -0.25574119 |
| C | 1.59554388  | -3.54775879 | 1.14819694  |
| H | -0.01464957 | -2.20023891 | 1.52569179  |
| C | 3.45910016  | -2.63995008 | -0.08955894 |
| H | 3.24734634  | -0.67841777 | -0.82076117 |
| C | 2.84600612  | -3.70619721 | 0.62555688  |
| H | 1.14205224  | -4.33992761 | 1.71714536  |
| H | 3.38221873  | -4.62878276 | 0.76255893  |
| C | 4.33396173  | 3.32842223  | 0.75911541  |
| H | 5.23363834  | 3.41023678  | 0.15563312  |
| H | 4.11698886  | 4.31804313  | 1.15111102  |
| H | 4.55447001  | 2.67935352  | 1.59857395  |
| C | -4.83949470 | -2.83629146 | 0.67609769  |
| H | -5.55044443 | -3.09923136 | -0.10217681 |
| H | -4.84274064 | -3.64471950 | 1.40192194  |
| H | -5.19669608 | -1.94061035 | 1.16919472  |
| C | 4.83838278  | -2.84318760 | -0.66699490 |
| H | 5.54906121  | -3.10419600 | 0.11217547  |
| H | 4.84080115  | -3.65409236 | -1.39005708 |
| H | 5.19649947  | -1.94956157 | -1.16314868 |
| H | -1.35459191 | 3.61471079  | 2.78652103  |
| C | -4.32865240 | 3.33009929  | -0.77374583 |
| H | -5.22595388 | 3.42454152  | -0.16864053 |
| H | -4.10639325 | 4.31386154  | -1.17742253 |
| H | -4.55581746 | 2.67319411  | -1.60528530 |

### S<sub>1</sub>S<sub>0</sub> -cyc (C4C5)

|   |              |              |              |
|---|--------------|--------------|--------------|
| C | 0.020028200  | 0.031920300  | 0.003147200  |
| C | 1.414242500  | 0.012310900  | 0.012012900  |
| C | -0.674945200 | 0.024044900  | -1.270004800 |
| C | -2.051807800 | 0.264279200  | -1.341786100 |
| C | 0.020433000  | -0.371074000 | -2.493279200 |
| C | -2.785259100 | -0.165625700 | -2.430637800 |
| H | -2.544938300 | 0.746735800  | -0.518221500 |
| C | -0.781051100 | -0.673950500 | -3.623512200 |
| H | 0.848859500  | 0.268930000  | -2.747838400 |
| C | -2.148137000 | -0.709716900 | -3.564448800 |
| H | -2.742574300 | -1.094004800 | -4.374203100 |
| C | 2.097505300  | -0.717956900 | -0.999625200 |
| C | 1.266911300  | -1.634454500 | -1.747843700 |
| C | 3.453268200  | -0.551880000 | -1.335064200 |



|   |              |              |              |
|---|--------------|--------------|--------------|
| C | 1.883116300  | -2.333368200 | -2.833677800 |
| H | 0.487395300  | -2.148317400 | -1.157634400 |
| C | 4.031399000  | -1.270699600 | -2.352121000 |
| H | 4.034151200  | 0.182262200  | -0.786940800 |
| C | 3.213081700  | -2.178529500 | -3.074244500 |
| H | 1.289778900  | -3.029789600 | -3.400732600 |
| H | 3.683309300  | -2.782274900 | -3.844241600 |
| C | -0.722843100 | 0.427455500  | 1.225724600  |
| C | -1.002368600 | -0.544966700 | 2.196884800  |
| C | -1.156206900 | 1.735650100  | 1.441263700  |
| C | -1.678505800 | -0.205507100 | 3.354037000  |
| H | -0.670679700 | -1.559987800 | 2.035680000  |
| C | -1.843496300 | 2.084241200  | 2.603633000  |
| H | -0.956321000 | 2.490573300  | 0.692055500  |
| C | -2.098350200 | 1.108128700  | 3.557242600  |
| H | -1.881787100 | -0.955469600 | 4.105425600  |
| H | -2.622091200 | 1.374475300  | 4.464539000  |
| C | 2.208755200  | 0.733298000  | 1.037953600  |
| C | 2.059508600  | 2.108811700  | 1.206699000  |
| C | 3.113673800  | 0.031688400  | 1.827057300  |
| C | 2.818218700  | 2.774061000  | 2.156363200  |
| H | 1.368154500  | 2.651912900  | 0.582981400  |
| C | 3.863770800  | 0.688484800  | 2.795893100  |
| H | 3.216072300  | -1.034881100 | 1.685689100  |
| C | 3.710764400  | 2.064999700  | 2.951124200  |
| H | 2.708768300  | 3.840846300  | 2.285116900  |
| H | 4.290043100  | 2.581947800  | 3.702518300  |
| C | 5.493018300  | -1.173496100 | -2.687857500 |
| H | 5.932171900  | -0.263989700 | -2.279597700 |
| H | 6.047921400  | -2.024536400 | -2.283251500 |
| H | 5.644568000  | -1.160454300 | -3.768264500 |
| C | -2.325560500 | 3.497319700  | 2.801403500  |
| H | -3.324603000 | 3.611303800  | 2.380835700  |
| H | -2.369132600 | 3.747709000  | 3.858761800  |
| H | -1.666818200 | 4.210010900  | 2.309237900  |
| C | 4.811945500  | -0.088528800 | 3.669549500  |
| H | 5.338924200  | -0.846147800 | 3.093082000  |
| H | 5.549716200  | 0.567731300  | 4.125107700  |
| H | 4.260060300  | -0.588087900 | 4.464813400  |
| H | -0.264399600 | -0.896920400 | -4.552021100 |
| C | -4.282972000 | -0.047937200 | -2.426966300 |
| H | -4.601550200 | 0.584940400  | -3.251984500 |
| H | -4.725120200 | -1.033185600 | -2.555048500 |
| H | -4.645936100 | 0.376246300  | -1.495954000 |

S<sub>1</sub>S<sub>0</sub> -cyc (C8C9)

|   |              |              |              |
|---|--------------|--------------|--------------|
| C | 0.011631800  | 0.018643400  | -0.008767700 |
| C | 1.426493300  | 0.012326800  | -0.008748700 |
| C | -0.591361900 | -0.023319800 | -1.383409100 |

|   |              |              |              |
|---|--------------|--------------|--------------|
| C | -1.313471800 | -1.128982300 | -1.810521800 |
| C | -0.452214300 | 1.068637800  | -2.249066700 |
| C | -1.883273500 | -1.177577500 | -3.077879500 |
| H | -1.427014800 | -1.960225000 | -1.129055800 |
| C | -1.014611100 | 1.030490500  | -3.516569500 |
| H | 0.099460600  | 1.943814100  | -1.933694600 |
| C | -1.726699700 | -0.090535600 | -3.930330300 |
| H | -2.156670800 | -0.124996300 | -4.921354900 |
| C | 2.134210300  | -1.004065000 | -0.810244900 |
| C | 1.649479000  | -2.314166900 | -0.830932200 |
| C | 3.307377000  | -0.691476400 | -1.510934100 |
| C | 2.331319000  | -3.300872700 | -1.536470400 |
| H | 0.750522100  | -2.544072900 | -0.285080500 |
| C | 3.977200700  | -1.665948600 | -2.229373500 |
| H | 3.671548800  | 0.325204800  | -1.500251000 |
| C | 3.484517800  | -2.977274600 | -2.226793300 |
| H | 1.955147700  | -4.313038100 | -1.552745500 |
| H | 4.012403200  | -3.742686300 | -2.779343900 |
| C | -0.632584900 | 0.936322200  | 0.922163100  |
| C | 0.019298900  | 1.245452900  | 2.175211800  |
| C | -1.855500100 | 1.564206800  | 0.630926400  |
| C | -0.646065900 | 2.127610300  | 3.070338400  |
| H | 0.576593700  | 0.451068800  | 2.644131600  |
| C | -2.433591700 | 2.450362500  | 1.511152200  |
| H | -2.380383300 | 1.269693700  | -0.261606000 |
| C | -1.781722500 | 2.795560400  | 2.718853300  |
| H | -0.189331200 | 2.298484900  | 4.037947900  |
| H | -2.234848900 | 3.521255200  | 3.373245900  |
| C | 2.173012300  | 0.948778200  | 0.761748600  |
| C | 1.445033200  | 2.096203200  | 1.294322600  |
| C | 3.427201800  | 0.615040800  | 1.319324800  |
| C | 2.117442100  | 2.890061700  | 2.295972000  |
| H | 0.866305500  | 2.680768000  | 0.561747900  |
| C | 4.049352100  | 1.408394600  | 2.243938800  |
| H | 3.888666000  | -0.316308100 | 1.010995200  |
| C | 3.369397800  | 2.573861300  | 2.695992400  |
| H | 1.610505500  | 3.766968900  | 2.661153500  |
| H | 3.883885900  | 3.230982100  | 3.388006500  |
| C | 5.220622700  | -1.339006400 | -3.014253100 |
| H | 6.027265500  | -2.026184100 | -2.764738100 |
| H | 5.021777000  | -1.417475800 | -4.082189200 |
| H | 5.559435300  | -0.326890600 | -2.806098900 |
| C | -3.763106600 | 3.069884900  | 1.185838500  |
| H | -4.393364700 | 2.368671400  | 0.645200200  |
| H | -4.278598700 | 3.376184200  | 2.091899300  |
| H | -3.610495600 | 3.948456200  | 0.561196400  |
| C | 5.434112600  | 1.119742900  | 2.747719500  |
| H | 6.185038400  | 1.644078000  | 2.150259600  |
| H | 5.545139400  | 1.442558000  | 3.782858100  |
| H | 5.652326100  | 0.053249000  | 2.703090700  |

|   |              |              |              |
|---|--------------|--------------|--------------|
| H | -0.897300900 | 1.868765500  | -4.189724200 |
| C | -2.650036400 | -2.401572000 | -3.501501700 |
| H | -3.537243100 | -2.525275600 | -2.881854400 |
| H | -2.964396900 | -2.322722900 | -4.539349700 |
| H | -2.032253400 | -3.291680700 | -3.396742100 |

S<sub>1</sub>S<sub>0</sub> -cyc (C1)

|   |              |              |              |
|---|--------------|--------------|--------------|
| C | 0.861481800  | 1.095552100  | 0.454808200  |
| C | -0.489118000 | 0.649671200  | 0.242420600  |
| C | 1.030577500  | -0.405111300 | 1.004456200  |
| C | 1.782589400  | -1.377903100 | 0.317428100  |
| C | 0.671650700  | -0.679801100 | 2.326607500  |
| C | 2.232200800  | -2.515285800 | 0.928908700  |
| H | 2.045569100  | -1.178683100 | -0.699454800 |
| C | 1.077924600  | -1.856295100 | 2.947403900  |
| H | 0.096198200  | 0.034887100  | 2.876448000  |
| C | 1.856947700  | -2.757020500 | 2.260036400  |
| H | 2.183061600  | -3.661568100 | 2.739295500  |
| C | -1.002809100 | -0.393493600 | -0.737760400 |
| C | -0.574482700 | -0.387543600 | -2.068922100 |
| C | -1.865198900 | -1.407706400 | -0.305253100 |
| C | -1.034296200 | -1.376948500 | -2.941991400 |
| H | 0.098462800  | 0.362319000  | -2.420361700 |
| C | -2.317233300 | -2.386964800 | -1.171625400 |
| H | -2.132987000 | -1.446994300 | 0.730792200  |
| C | -1.891615500 | -2.354848800 | -2.504227300 |
| H | -0.697478200 | -1.377102000 | -3.960929200 |
| H | -2.236165700 | -3.114216000 | -3.181113000 |
| C | 1.712258400  | 1.480412200  | -0.626159700 |
| C | 1.194189300  | 2.316517100  | -1.645735100 |
| C | 3.106314300  | 1.277224300  | -0.632124900 |
| C | 2.018703600  | 2.889755900  | -2.583021100 |
| H | 0.142833900  | 2.543652500  | -1.640611200 |
| C | 3.920675900  | 1.871365600  | -1.569639400 |
| H | 3.536665300  | 0.678143300  | 0.147127600  |
| C | 3.385060300  | 2.675098600  | -2.572125000 |
| H | 1.585171000  | 3.525753000  | -3.333672800 |
| H | 4.020095300  | 3.127980800  | -3.304608900 |
| C | -1.541893700 | 1.302077100  | 1.067388800  |
| C | -1.091421900 | 2.192187400  | 2.045716500  |
| C | -2.920741700 | 1.186660000  | 0.831899300  |
| C | -1.993071500 | 2.890483900  | 2.820204300  |
| H | -0.027455600 | 2.289572800  | 2.121205900  |
| C | -3.824195800 | 1.905131600  | 1.586585600  |
| H | -3.281487200 | 0.572800000  | 0.035585200  |
| C | -3.346230600 | 2.739944100  | 2.595797400  |
| H | -1.640884800 | 3.557962400  | 3.580500600  |
| H | -4.048091600 | 3.290619100  | 3.194781800  |
| C | -3.252058200 | -3.474562700 | -0.688666300 |

|   |              |              |              |
|---|--------------|--------------|--------------|
| H | -4.106525000 | -3.556191400 | -1.351242100 |
| H | -2.739686500 | -4.430084500 | -0.662120900 |
| H | -3.612798500 | -3.251325600 | 0.308160800  |
| C | 5.424183500  | 1.695191000  | -1.485452400 |
| H | 5.837734200  | 1.483439400  | -2.465251300 |
| H | 5.879064000  | 2.609903800  | -1.116272300 |
| H | 5.689861400  | 0.888354000  | -0.812815500 |
| C | -5.312973400 | 1.817825600  | 1.327816400  |
| H | -5.844269400 | 1.572517700  | 2.241447200  |
| H | -5.687756000 | 2.765708300  | 0.956636000  |
| H | -5.528719800 | 1.053082800  | 0.592538300  |
| H | 0.790136000  | -2.055391800 | 3.960639500  |
| C | 3.106367700  | -3.508730100 | 0.193642000  |
| H | 4.119719200  | -3.476807300 | 0.580632400  |
| H | 2.724639400  | -4.517753900 | 0.309175600  |
| H | 3.137022100  | -3.272375100 | -0.862643400 |

S<sub>1</sub>S<sub>0</sub> -cyc (C2)

|   |              |              |              |
|---|--------------|--------------|--------------|
| C | 0.518517700  | -0.622159700 | 0.241872900  |
| C | -0.827177000 | -1.098444700 | 0.405651700  |
| C | 1.554804800  | -1.284241000 | 1.082926000  |
| C | 2.938466500  | -1.151479500 | 0.886642100  |
| C | 1.085285100  | -2.204432600 | 2.025167900  |
| C | 3.826713800  | -1.889216300 | 1.643705500  |
| H | 3.317206100  | -0.510041100 | 0.117845100  |
| C | 1.972944500  | -2.917684500 | 2.804047000  |
| H | 0.019415600  | -2.315203000 | 2.071552400  |
| C | 3.331398200  | -2.756104000 | 2.617643100  |
| H | 4.022439000  | -3.321892800 | 3.218800200  |
| C | -1.648526100 | -1.465847200 | -0.706873200 |
| C | -1.097904000 | -2.265109700 | -1.738965500 |
| C | -3.046254000 | -1.286042900 | -0.730308000 |
| C | -1.898355200 | -2.827237000 | -2.706632500 |
| H | -0.041733900 | -2.476689700 | -1.723844100 |
| C | -3.833917500 | -1.862885700 | -1.702378700 |
| H | -3.501379000 | -0.717783800 | 0.060229200  |
| C | -3.267915800 | -2.631949700 | -2.716880800 |
| H | -1.441851100 | -3.437948200 | -3.467291200 |
| H | -3.883366700 | -3.073584400 | -3.475713400 |
| C | 1.048983600  | 0.453769100  | -0.692943800 |
| C | 0.650805000  | 0.480824100  | -2.032977700 |
| C | 1.896011200  | 1.461887700  | -0.211095400 |
| C | 1.127310600  | 1.494462900  | -2.869715900 |
| H | -0.013808300 | -0.262295600 | -2.419477100 |
| C | 2.365330000  | 2.463591200  | -1.044541900 |
| H | 2.139791000  | 1.477838100  | 0.833464900  |
| C | 1.973142900  | 2.463863500  | -2.388440800 |
| H | 0.809622100  | 1.523435200  | -3.896023100 |
| H | 2.330411700  | 3.243595800  | -3.038232700 |

|   |              |              |              |
|---|--------------|--------------|--------------|
| C | -1.031016300 | 0.379395400  | 0.993917300  |
| C | -0.703039500 | 0.626438200  | 2.329915000  |
| C | -1.788429100 | 1.356670300  | 0.314805700  |
| C | -1.139894000 | 1.782318000  | 2.970586100  |
| H | -0.123951000 | -0.091157800 | 2.876028800  |
| C | -2.265297000 | 2.473642000  | 0.947715700  |
| H | -2.032083400 | 1.178604200  | -0.712826700 |
| C | -1.918981900 | 2.690806100  | 2.291014000  |
| H | -0.871217100 | 1.962551700  | 3.994467700  |
| H | -2.264525400 | 3.581677300  | 2.786566300  |
| C | -5.339342900 | -1.695746300 | -1.654164000 |
| H | -5.718862700 | -1.410592300 | -2.631097500 |
| H | -5.803590600 | -2.636781300 | -1.368542400 |
| H | -5.627225200 | -0.938186900 | -0.932620500 |
| C | 3.292066100  | 3.538512400  | -0.521592200 |
| H | 4.238686400  | 3.502161300  | -1.053626600 |
| H | 2.849362000  | 4.519695700  | -0.662366300 |
| H | 3.485519000  | 3.395005000  | 0.535985000  |
| C | -3.137083800 | 3.472589600  | 0.218705200  |
| H | -4.165763400 | 3.388235800  | 0.558107700  |
| H | -2.792862800 | 4.486888100  | 0.399258000  |
| H | -3.109831400 | 3.283574100  | -0.848676900 |
| H | 1.605443000  | -3.608247000 | 3.538270600  |
| C | 5.319564200  | -1.786547900 | 1.422253800  |
| H | 5.819914900  | -1.494131000 | 2.341239800  |
| H | 5.718121600  | -2.744100700 | 1.100356600  |
| H | 5.541779000  | -1.047835600 | 0.660505600  |

TPE-4oM

S<sub>0</sub>

|   |             |             |             |
|---|-------------|-------------|-------------|
| C | -0.00416473 | -0.48649118 | 0.00056568  |
| C | -0.00423775 | 0.87719448  | 0.00194162  |
| C | 1.29071381  | -1.27995655 | -0.06854972 |
| C | 1.64826906  | -2.17991027 | 0.97300158  |
| C | 2.15207843  | -1.16078348 | -1.18003451 |
| C | 2.82815347  | -2.91870637 | 0.87400075  |
| C | 3.31996052  | -1.92699078 | -1.23201934 |
| C | 3.66247942  | -2.79496401 | -0.23044494 |
| H | 4.56763095  | -3.37289666 | -0.29435185 |
| C | 1.24542374  | 1.69780466  | 0.17572907  |
| C | 2.10873422  | 1.48378094  | 1.24511246  |
| C | 1.52936159  | 2.74756659  | -0.69653422 |
| C | 3.23076012  | 2.27678078  | 1.42726967  |
| H | 1.90564502  | 0.69337181  | 1.94275793  |
| C | 2.65354388  | 3.53503935  | -0.52338947 |
| H | 0.86390240  | 2.94997093  | -1.51607730 |

|   |             |             |             |
|---|-------------|-------------|-------------|
| C | 3.51043974  | 3.30207149  | 0.54113986  |
| H | 3.88209993  | 2.09190489  | 2.26297053  |
| H | 4.38131273  | 3.91756220  | 0.68083441  |
| C | -1.29847160 | -1.28035471 | 0.06640635  |
| C | -2.15523825 | -1.16176250 | 1.17258617  |
| C | -1.64870737 | -2.17733943 | -0.96501698 |
| C | -3.31922395 | -1.92571538 | 1.22959972  |
| C | -2.81791298 | -2.91553759 | -0.87164883 |
| C | -3.65585119 | -2.79792159 | 0.22168174  |
| H | -3.96310055 | -1.82504444 | 2.08639639  |
| H | -4.55894139 | -3.37941489 | 0.28077346  |
| C | -1.25214174 | 1.69993485  | -0.17299834 |
| C | -2.11548371 | 1.48734998  | -1.24284075 |
| C | -1.53317528 | 2.75184593  | 0.69759655  |
| C | -3.23474529 | 2.28370624  | -1.42654728 |
| H | -1.91484431 | 0.69496173  | -1.93878513 |
| C | -2.65489725 | 3.54263845  | 0.52292298  |
| H | -0.86748869 | 2.95332679  | 1.51720807  |
| C | -3.51183084 | 3.31099869  | -0.54176780 |
| H | -3.88619985 | 2.09982840  | -2.26236877 |
| H | -4.38073606 | 3.92897463  | -0.68275020 |
| H | 3.96320397  | -1.82548095 | -2.08975894 |
| H | -3.07691978 | -3.58931830 | -1.66903961 |
| H | 3.09449196  | -3.59139994 | 1.66955575  |
| H | 2.85648521  | 4.33346292  | -1.21502018 |
| H | -2.85569619 | 4.34255912  | 1.21345314  |
| C | 1.92144756  | -0.25050688 | -2.37269804 |
| H | 2.66891387  | 0.53438168  | -2.39428668 |
| H | 2.01396289  | -0.81747220 | -3.29377199 |
| H | 0.95468944  | 0.22427736  | -2.37244389 |
| C | 0.81849230  | -2.36925495 | 2.22642157  |
| H | -0.11041804 | -2.88653013 | 2.02381451  |
| H | 1.37176562  | -2.95571622 | 2.95056916  |
| H | 0.57347312  | -1.42612324 | 2.69662800  |
| C | -1.92335496 | -0.25095333 | 2.36273261  |
| H | -2.66220449 | 0.54271752  | 2.37482345  |
| H | -2.03362792 | -0.81444212 | 3.28406976  |
| H | -0.95096846 | 0.21150387  | 2.37058184  |
| C | -0.81388615 | -2.36747838 | -2.21336142 |
| H | -0.55041320 | -1.42396859 | -2.67246104 |
| H | 0.10697073  | -2.89936871 | -2.00817824 |
| H | -1.36953871 | -2.94051550 | -2.94592931 |

S<sub>1</sub>

|   |             |             |             |
|---|-------------|-------------|-------------|
| C | -0.02556158 | -0.46930518 | -0.01526019 |
| C | -0.01382563 | 1.03564923  | 0.02895294  |
| C | 1.18402558  | -1.13820548 | -0.54778486 |
| C | 1.76814894  | -2.21669392 | 0.17214619  |
| C | 1.86005025  | -0.71234143 | -1.72202981 |

|   |             |             |             |
|---|-------------|-------------|-------------|
| C | 2.94030685  | -2.80968211 | -0.28247773 |
| C | 3.03871039  | -1.32124222 | -2.12330833 |
| C | 3.58966012  | -2.37214933 | -1.41716365 |
| H | 4.50192291  | -2.83833139 | -1.74481409 |
| C | 1.08564154  | 1.73166360  | 0.67539202  |
| C | 1.87565529  | 1.06775065  | 1.63951016  |
| C | 1.54198118  | 3.01029848  | 0.24462115  |
| C | 2.94223619  | 1.70047486  | 2.24999526  |
| H | 1.62862459  | 0.06547896  | 1.91173713  |
| C | 2.63132852  | 3.60764738  | 0.82078247  |
| H | 1.06303973  | 3.49896886  | -0.58042142 |
| C | 3.32463112  | 2.96636808  | 1.84910813  |
| H | 3.49732726  | 1.18473178  | 3.01206868  |
| H | 4.17737279  | 3.44189593  | 2.29905524  |
| C | -1.18089602 | -1.17793011 | 0.50822660  |
| C | -1.95072646 | -0.72326549 | 1.63219585  |
| C | -1.69341413 | -2.34234291 | -0.17465431 |
| C | -3.12630718 | -1.36142274 | 1.99596694  |
| C | -2.85745476 | -2.94545182 | 0.25377920  |
| C | -3.59743882 | -2.47115434 | 1.32808692  |
| H | -3.66964051 | -0.99084154 | 2.84887446  |
| H | -4.50884333 | -2.95590033 | 1.62851861  |
| C | -1.09005070 | 1.75842112  | -0.59525610 |
| C | -1.96526669 | 1.08676726  | -1.47699590 |
| C | -1.41764195 | 3.10047675  | -0.25700634 |
| C | -3.01544420 | 1.74942855  | -2.08625042 |
| H | -1.79583191 | 0.05380110  | -1.68422970 |
| C | -2.48387675 | 3.73750032  | -0.83094898 |
| H | -0.85903657 | 3.60858289  | 0.50218023  |
| C | -3.27587501 | 3.06815972  | -1.76919119 |
| H | -3.64668063 | 1.22335223  | -2.77793720 |
| H | -4.11173933 | 3.57423358  | -2.21786318 |
| H | 3.52215798  | -0.97707647 | -3.02144770 |
| H | -3.22205992 | -3.79935678 | -0.29186746 |
| H | 3.36097962  | -3.62219715 | 0.28468598  |
| H | 2.96280679  | 4.56706677  | 0.46687157  |
| H | -2.72537690 | 4.74479763  | -0.54552934 |
| C | 1.30465248  | 0.35926105  | -2.63095877 |
| H | 1.88656010  | 0.41761862  | -3.54328848 |
| H | 0.27828865  | 0.15016965  | -2.91023816 |
| H | 1.32228781  | 1.34837343  | -2.18521529 |
| C | 1.19156321  | -2.76972795 | 1.45909448  |
| H | 0.33516893  | -3.41254709 | 1.28802862  |
| H | 1.94249472  | -3.35566352 | 1.97779600  |
| H | 0.85520306  | -1.98792424 | 2.12809926  |
| C | -1.45776787 | 0.36573019  | 2.55205347  |
| H | -2.13584527 | 0.48924184  | 3.38851850  |
| H | -0.47963778 | 0.12706118  | 2.95928285  |
| H | -1.36825863 | 1.33795301  | 2.07821801  |
| C | -1.06155584 | -2.90202566 | -1.43110075 |



|   |             |             |             |
|---|-------------|-------------|-------------|
| H | -0.81322790 | -2.11658012 | -2.13700071 |
| H | -0.14313413 | -3.44640651 | -1.24517167 |
| H | -1.75186531 | -3.58198440 | -1.91835883 |

S<sub>1</sub>S<sub>0</sub>-cyc (C4C5)

|   |              |              |              |
|---|--------------|--------------|--------------|
| C | 0.082519200  | -0.698712000 | 0.423360900  |
| C | -0.089306900 | 0.693531800  | 0.229766100  |
| C | -1.090730200 | -1.441023400 | 0.884108900  |
| C | -1.467029100 | -2.748095300 | 0.457119200  |
| C | -1.984306500 | -0.750285100 | 1.820083900  |
| C | -2.721504800 | -3.228443400 | 0.763411100  |
| C | -3.195771600 | -1.407269800 | 2.191524800  |
| C | -3.652166800 | -2.514654100 | 1.538777700  |
| H | -4.632627100 | -2.919572700 | 1.719001100  |
| C | -1.346783400 | 1.350493000  | 0.374392300  |
| C | -2.527567900 | 0.506021300  | 0.522502400  |
| C | -1.408135400 | 2.704585000  | 0.781898900  |
| C | -3.715294800 | 1.149575000  | 1.033919700  |
| H | -2.720969200 | -0.220297300 | -0.288880200 |
| C | -2.568712100 | 3.282344100  | 1.207375200  |
| H | -0.491487600 | 3.280918000  | 0.762440300  |
| C | -3.732702500 | 2.473771800  | 1.306413500  |
| H | -4.607295000 | 0.552533300  | 1.113114800  |
| H | -4.666372300 | 2.937078000  | 1.600973900  |
| C | 0.943838200  | -1.294205900 | -0.661924600 |
| C | 0.558065300  | -1.227961400 | -2.024346500 |
| C | 2.163726700  | -1.898683900 | -0.331651900 |
| C | 1.404309600  | -1.737208400 | -2.996919900 |
| C | 2.993821200  | -2.405707500 | -1.330382000 |
| C | 2.624488000  | -2.319629500 | -2.658520400 |
| H | 1.113598800  | -1.672035500 | -4.037639700 |
| H | 3.273843100  | -2.703509200 | -3.431146600 |
| C | 1.075881300  | 1.505090400  | -0.190678100 |
| C | 2.309067100  | 1.330648800  | 0.435196200  |
| C | 0.941712400  | 2.462842600  | -1.194636300 |
| C | 3.398897900  | 2.103194700  | 0.059447700  |
| H | 2.401263300  | 0.594580900  | 1.214674600  |
| C | 2.037820000  | 3.220594600  | -1.583974900 |
| H | -0.013964100 | 2.589391600  | -1.678764500 |
| C | 3.261624000  | 3.045586900  | -0.950354500 |
| H | 4.352250900  | 1.966035400  | 0.546787300  |
| H | 4.111554900  | 3.641658900  | -1.247651200 |
| H | -3.793777700 | -0.941737900 | 2.967778100  |
| H | 3.933355600  | -2.865660100 | -1.057336800 |
| H | -2.995749400 | -4.216206900 | 0.411569500  |
| H | -2.624185900 | 4.327012200  | 1.448176000  |
| H | 1.938746700  | 3.943285200  | -2.379007700 |
| C | -1.293830400 | 0.001574500  | 2.948367400  |
| H | -1.026535500 | 1.013388600  | 2.662949400  |

|   |              |              |              |
|---|--------------|--------------|--------------|
| H | -1.942713700 | 0.054697300  | 3.820592800  |
| H | -0.387803200 | -0.534584600 | 3.227175200  |
| C | -0.469539000 | -3.708756900 | -0.137173200 |
| H | -0.892912000 | -4.712021800 | -0.162297800 |
| H | -0.184380300 | -3.427684500 | -1.141223400 |
| H | 0.422770400  | -3.737411400 | 0.481497700  |
| C | -0.750471100 | -0.613872700 | -2.453529600 |
| H | -0.694417600 | 0.471823200  | -2.410620500 |
| H | -0.997734600 | -0.901388800 | -3.473552200 |
| H | -1.565212000 | -0.938366300 | -1.812455100 |
| C | 2.563430800  | -2.048676300 | 1.111892700  |
| H | 3.559180400  | -1.638729200 | 1.281580000  |
| H | 1.860133800  | -1.538099300 | 1.759511200  |
| H | 2.580504100  | -3.102904700 | 1.390448500  |

### S<sub>1</sub>S<sub>0</sub>-cyc (C8C9)

|   |              |              |              |
|---|--------------|--------------|--------------|
| C | 0.082838700  | -0.698579700 | 0.423109900  |
| C | -0.088727900 | 0.693708900  | 0.229780500  |
| C | 0.943782800  | -1.294599900 | -0.662092500 |
| C | 2.163675700  | -1.899134700 | -0.331803600 |
| C | 0.557550800  | -1.228890100 | -2.024457700 |
| C | 2.993448000  | -2.406755100 | -1.330452700 |
| C | 1.403492600  | -1.738877600 | -2.996923400 |
| C | 2.623710900  | -2.321304200 | -2.658556900 |
| H | 3.272881000  | -2.705581900 | -3.431157200 |
| C | 1.076280500  | 1.505820900  | -0.190531300 |
| C | 2.309501800  | 1.331518800  | 0.435364300  |
| C | 0.942070900  | 2.463941200  | -1.194082300 |
| C | 3.399154700  | 2.104639100  | 0.060158000  |
| H | 2.401660200  | 0.595114200  | 1.214523200  |
| C | 2.038000100  | 3.222269200  | -1.582940500 |
| H | -0.013710000 | 2.590049600  | -1.678218500 |
| C | 3.261792000  | 3.047441800  | -0.949176600 |
| H | 4.352471500  | 1.967624700  | 0.547634300  |
| H | 4.111513700  | 3.643852200  | -1.246185100 |
| C | -1.090477000 | -1.440947600 | 0.883890000  |
| C | -1.983885900 | -0.750282400 | 1.819930700  |
| C | -1.467283700 | -2.747846200 | 0.456576300  |
| C | -3.195259300 | -1.406829800 | 2.191388500  |
| C | -2.721708100 | -3.228068300 | 0.763305200  |
| C | -3.652043500 | -2.514276300 | 1.538674900  |
| H | -3.793120200 | -0.941080100 | 2.967568600  |
| H | -4.632823200 | -2.918191100 | 1.719286100  |
| C | -1.346445300 | 1.350224700  | 0.375008500  |
| C | -2.527144000 | 0.505630100  | 0.522603900  |
| C | -1.408244600 | 2.704335700  | 0.782557900  |
| C | -3.715205400 | 1.149021300  | 1.033752900  |
| H | -2.720418900 | -0.220581200 | -0.288777900 |
| C | -2.569131400 | 3.281878000  | 1.207513500  |

|   |              |              |              |
|---|--------------|--------------|--------------|
| H | -0.491872200 | 3.281110000  | 0.763418200  |
| C | -3.733081000 | 2.473132200  | 1.305939700  |
| H | -4.607056900 | 0.551763400  | 1.112745800  |
| H | -4.666941300 | 2.936241700  | 1.600084800  |
| H | 1.112259000  | -1.674267700 | -4.037508100 |
| H | -2.995800400 | -4.215929500 | 0.411634000  |
| H | 3.933034400  | -2.866614900 | -1.057535400 |
| H | 1.939041600  | 3.945087000  | -2.377866200 |
| H | -2.625051500 | 4.326515900  | 1.448286200  |
| C | -0.750815500 | -0.614656900 | -2.453904100 |
| H | -0.694517500 | 0.470998200  | -2.410889000 |
| H | -0.997692400 | -0.902068300 | -3.474033500 |
| H | -1.565953500 | -0.939015200 | -1.813291400 |
| C | 2.563481300  | -2.048516800 | 1.111775200  |
| H | 1.860303300  | -1.537455800 | 1.759040000  |
| H | 2.580343200  | -3.102632900 | 1.390928400  |
| H | 3.559304200  | -1.638634400 | 1.281127200  |
| C | -1.292773000 | 0.001727600  | 2.947716600  |
| H | -1.025302000 | 1.013344300  | 2.661789500  |
| H | -1.941113200 | 0.055420500  | 3.820293900  |
| H | -0.386796200 | -0.534653900 | 3.226106800  |
| C | -0.470129500 | -3.709004300 | -0.137471300 |
| H | -0.184650800 | -3.428152300 | -1.141385900 |
| H | 0.421956300  | -3.738005300 | 0.481496600  |
| H | -0.893962700 | -4.712119800 | -0.162605700 |

### S<sub>1</sub>S<sub>0</sub>-cyc (C1)

|   |              |              |              |
|---|--------------|--------------|--------------|
| C | 0.012775100  | -0.098276000 | 0.047176500  |
| C | 1.424710700  | -0.019040700 | -0.091507600 |
| C | -0.840788500 | -1.077628600 | 0.663587200  |
| C | -2.133115800 | -1.399460400 | 0.166571000  |
| C | -0.482523500 | -1.656118700 | 1.914773100  |
| C | -2.917469400 | -2.335266600 | 0.812327700  |
| C | -1.303458400 | -2.592783300 | 2.516669400  |
| C | -2.512388000 | -2.969350600 | 1.971044500  |
| H | -3.134961900 | -3.696725000 | 2.450914200  |
| C | 2.149138600  | 1.210103200  | 0.419318300  |
| C | 1.452074500  | 2.045287300  | 1.289678900  |
| C | 3.497034900  | 1.475106500  | 0.179985600  |
| C | 2.073075800  | 3.116301200  | 1.895883900  |
| H | 0.421782800  | 1.818741200  | 1.459642400  |
| C | 4.114588100  | 2.566116200  | 0.765610400  |
| H | 4.072684200  | 0.831346800  | -0.446749700 |
| C | 3.404115900  | 3.387657400  | 1.622301900  |
| H | 1.522839100  | 3.741370700  | 2.569982800  |
| H | 3.885222000  | 4.230471400  | 2.078910400  |
| C | 0.157082900  | -0.022661100 | -1.570682700 |
| C | 0.060557900  | 1.265311900  | -2.196745200 |
| C | 0.116325900  | -1.179494700 | -2.396358400 |

|   |              |              |              |
|---|--------------|--------------|--------------|
| C | -0.034876900 | 1.347570100  | -3.572277900 |
| C | -0.023146500 | -1.040495800 | -3.770461100 |
| C | -0.069131900 | 0.203542700  | -4.354401300 |
| H | -0.108734200 | 2.309790100  | -4.039221200 |
| H | -0.149419200 | 0.289233100  | -5.421107400 |
| C | 2.421985900  | -1.069919100 | -0.622535400 |
| C | 2.672733000  | -2.220646900 | 0.096919100  |
| C | 3.120421500  | -0.859040400 | -1.831286000 |
| C | 3.617758600  | -3.156304200 | -0.371920800 |
| H | 2.133661800  | -2.433923000 | 0.994064400  |
| C | 4.024521600  | -1.771557300 | -2.282121600 |
| H | 2.898630300  | 0.016449000  | -2.407340500 |
| C | 4.284725800  | -2.937842300 | -1.540880000 |
| H | 3.793888300  | -4.049425900 | 0.195022000  |
| H | 4.996048900  | -3.651305900 | -1.906673500 |
| H | -0.990961400 | -3.014731100 | 3.454905100  |
| H | -0.081697800 | -1.921029300 | -4.378857000 |
| H | -3.884900000 | -2.557283500 | 0.400868000  |
| H | 5.147833800  | 2.764065600  | 0.563434000  |
| H | 4.531926500  | -1.606980800 | -3.211597400 |
| C | 0.713148400  | -1.177081500 | 2.726001800  |
| H | 0.391625800  | -0.427317500 | 3.444620500  |
| H | 1.157533800  | -1.997112800 | 3.282444000  |
| H | 1.487282500  | -0.719125000 | 2.133192200  |
| C | -2.732805500 | -0.689491100 | -1.036355400 |
| H | -2.403108200 | -1.110850800 | -1.978251100 |
| H | -3.813775300 | -0.766421200 | -1.000157300 |
| H | -2.469006100 | 0.359911000  | -1.034998700 |
| C | -0.036328300 | 2.555604900  | -1.416336300 |
| H | 0.947248100  | 2.930228600  | -1.162110100 |
| H | -0.544118500 | 3.306267100  | -2.010138100 |
| H | -0.581086100 | 2.380829800  | -0.506058700 |
| C | 0.179295000  | -2.597002600 | -1.871783100 |
| H | 1.098887000  | -3.064324800 | -2.202044400 |
| H | 0.120849000  | -2.641991700 | -0.803522400 |
| H | -0.655446900 | -3.159123700 | -2.276757100 |

### S<sub>1</sub>S<sub>0</sub>-cyc (C2)

|   |              |              |              |
|---|--------------|--------------|--------------|
| C | 0.053415500  | -0.084164100 | -0.022443300 |
| C | 1.500732400  | -0.052811700 | 0.036337000  |
| C | -0.606900300 | -0.156111500 | -1.331988500 |
| C | -2.039178200 | -0.334080000 | -1.474267500 |
| C | 0.166467800  | -0.086250800 | -2.550328400 |
| C | -2.636029200 | -0.229327100 | -2.715457100 |
| C | -0.497019100 | 0.025085300  | -3.774427000 |
| C | -1.873636300 | 0.001720400  | -3.855926000 |
| H | -2.364828200 | 0.109956700  | -4.816458300 |
| C | 2.223189300  | -0.883222100 | 1.010071900  |
| C | 2.178439100  | -2.273254100 | 0.784630000  |

|   |              |              |              |
|---|--------------|--------------|--------------|
| C | 3.216914900  | -0.416435700 | 1.881927300  |
| C | 3.004178300  | -3.147311300 | 1.459604900  |
| H | 1.483864000  | -2.654609100 | 0.044169800  |
| C | 4.065347900  | -1.304528700 | 2.535856000  |
| H | 3.359727000  | 0.644296100  | 2.021070000  |
| C | 3.959841600  | -2.674125300 | 2.353989600  |
| H | 2.917334400  | -4.209604600 | 1.266493900  |
| H | 4.620963900  | -3.358333000 | 2.864263700  |
| C | -0.915097700 | 0.136981600  | 1.142271400  |
| C | -1.064836700 | -0.836493800 | 2.155621900  |
| C | -1.590070000 | 1.367704300  | 1.252246300  |
| C | -1.828790400 | -0.522369400 | 3.288516600  |
| C | -2.316899800 | 1.651474200  | 2.411447600  |
| C | -2.428527700 | 0.716132700  | 3.429599400  |
| H | -1.927631600 | -1.263584700 | 4.072310100  |
| H | -2.993998600 | 0.951170700  | 4.320540400  |
| C | 1.351813200  | 1.424621900  | 0.550159800  |
| C | 1.596477400  | 2.405814900  | -0.420310600 |
| C | 1.275706900  | 1.833090000  | 1.891675200  |
| C | 1.790834600  | 3.733546500  | -0.068391400 |
| H | 1.671443300  | 2.125106700  | -1.463252500 |
| C | 1.467846300  | 3.146964700  | 2.257854100  |
| H | 1.068716800  | 1.079649800  | 2.629447800  |
| C | 1.722897800  | 4.099076000  | 1.272038600  |
| H | 1.995372800  | 4.486513000  | -0.821272900 |
| H | 1.867194500  | 5.132582000  | 1.553813700  |
| H | 0.099075900  | 0.107637000  | -4.669381300 |
| H | -3.706926500 | -0.347422800 | -2.808054200 |
| H | -2.797408600 | 2.615078100  | 2.493949500  |
| H | 1.419660400  | 3.433071800  | 3.297704500  |
| H | 4.830129800  | -0.910576300 | 3.194378400  |
| C | -2.987560700 | -0.749054500 | -0.376662000 |
| H | -2.514366700 | -1.440940200 | 0.302359500  |
| H | -3.328740400 | 0.116910400  | 0.174744700  |
| H | -3.848784700 | -1.247281300 | -0.818657900 |
| C | 1.670118400  | -0.139919700 | -2.657117400 |
| H | 1.975727000  | -0.165693700 | -1.580048800 |
| H | 1.909029000  | -1.053815200 | -3.204670300 |
| H | 2.013751700  | 0.728262000  | -3.233260200 |
| C | -0.508221500 | -2.234466000 | 2.061638400  |
| H | -0.564287300 | -2.625887100 | 1.045755600  |
| H | 0.529289800  | -2.241579300 | 2.365758900  |
| H | -1.071431300 | -2.913904500 | 2.702662100  |
| C | -1.523397500 | 2.437465000  | 0.197595400  |
| H | -2.536680900 | 2.744039000  | -0.059604200 |
| H | -0.977931400 | 3.290046000  | 0.593258800  |
| H | -1.027875800 | 2.115377100  | -0.707120800 |

## OM2/MRCI method

TPE-4mM

S<sub>0</sub>

|   |              |              |              |
|---|--------------|--------------|--------------|
| C | 0.663026700  | -0.009855100 | -0.022002100 |
| C | -0.694077600 | -0.023025800 | -0.017180300 |
| C | 1.474862300  | -1.248428200 | 0.034644800  |
| C | 2.557623200  | -1.404830700 | -0.823152900 |
| C | 1.163434200  | -2.234603300 | 0.980416000  |
| C | 3.336039200  | -2.572306500 | -0.754984100 |
| H | 2.809331000  | -0.621717000 | -1.545187200 |
| C | 1.946607100  | -3.392897300 | 1.041777200  |
| H | 0.304551000  | -2.115041900 | 1.644142900  |
| C | 3.019837700  | -3.561558100 | 0.186434100  |
| H | 3.631612600  | -4.471871800 | 0.243093000  |
| C | -1.480900400 | -1.267479800 | -0.087693200 |
| C | -1.204247500 | -2.230444500 | -1.067074700 |
| C | -2.553617000 | -1.456350100 | 0.810527900  |
| C | -1.967940800 | -3.370623400 | -1.123232800 |
| H | -0.375825700 | -2.074701300 | -1.761273800 |
| C | -3.303342100 | -2.606336400 | 0.752170600  |
| H | -2.780519200 | -0.673432700 | 1.542335400  |
| C | -3.016011700 | -3.577149900 | -0.213034700 |
| H | -1.756840300 | -4.139042600 | -1.878844600 |
| H | -3.608639400 | -4.497649100 | -0.260842400 |
| C | 1.452022800  | 1.237281200  | -0.073103100 |
| C | 1.153580400  | 2.222483100  | -1.024536500 |
| C | 2.535253800  | 1.411491800  | 0.814566100  |
| C | 1.921539200  | 3.384000000  | -1.075201800 |
| H | 0.309816800  | 2.086993100  | -1.704945800 |
| C | 3.295058900  | 2.585794200  | 0.760550100  |
| H | 2.779593400  | 0.624974900  | 1.535501700  |
| C | 2.989876100  | 3.573303400  | -0.185402900 |
| H | 1.690652600  | 4.158822000  | -1.816533100 |
| H | 3.586957900  | 4.489915400  | -0.236023900 |
| C | -1.498623700 | 1.218948500  | 0.070960000  |
| C | -1.230414700 | 2.146730300  | 1.085958800  |
| C | -2.525738200 | 1.450785700  | -0.843639200 |
| C | -1.997833700 | 3.311312900  | 1.173945200  |
| H | -0.416212200 | 1.967295300  | 1.792781800  |
| C | -3.286848300 | 2.626983000  | -0.751612400 |
| H | -2.739551100 | 0.719633800  | -1.630356700 |
| C | -3.017203600 | 3.554182800  | 0.263840600  |
| H | -1.792570200 | 4.033955300  | 1.973598700  |
| H | -3.615355700 | 4.469439000  | 0.336806400  |
| C | -4.458210100 | -2.818307600 | 1.693261500  |
| H | -5.395080800 | -2.593373500 | 1.164416800  |
| H | -4.474792400 | -3.860838000 | 2.044583000  |
| H | -4.369945300 | -2.154299200 | 2.566974500  |

|   |              |              |              |
|---|--------------|--------------|--------------|
| C | 4.455390600  | 2.771787200  | 1.685796900  |
| H | 5.372416500  | 2.421608900  | 1.186386300  |
| H | 4.570463400  | 3.835365000  | 1.946248200  |
| H | 4.308126000  | 2.194297600  | 2.611058900  |
| C | -4.403193000 | 2.876216900  | -1.713511300 |
| H | -5.335284800 | 2.465674500  | -1.293766600 |
| H | -4.532857400 | 3.956776500  | -1.882089600 |
| H | -4.200410600 | 2.387074000  | -2.678290500 |
| H | 1.700895600  | -4.170428000 | 1.775505700  |
| C | 4.516986200  | -2.741065300 | -1.653670200 |
| H | 5.419148500  | -2.364074200 | -1.142755300 |
| H | 4.664106200  | -3.805009600 | -1.899540100 |
| H | 4.376600300  | -2.175025800 | -2.587894800 |

S<sub>1</sub>

|   |              |              |              |
|---|--------------|--------------|--------------|
| C | 0.710263000  | -0.003706300 | -0.006674800 |
| C | -0.715274100 | -0.009451900 | -0.002406500 |
| C | 1.442218900  | -1.185272500 | 0.393712100  |
| C | 2.707545200  | -1.460272000 | -0.188604300 |
| C | 0.863464400  | -2.122123200 | 1.272250400  |
| C | 3.364619700  | -2.657033800 | 0.107195200  |
| H | 3.143878800  | -0.763255200 | -0.910892200 |
| C | 1.547543000  | -3.305345300 | 1.572884000  |
| H | -0.110864300 | -1.919514100 | 1.722849300  |
| C | 2.787471400  | -3.572465900 | 0.998924900  |
| H | 3.319770000  | -4.501914400 | 1.236103800  |
| C | -1.444020800 | -1.186392700 | -0.406396400 |
| C | -0.865529200 | -2.119893200 | -1.296127900 |
| C | -2.710044000 | -1.479300700 | 0.168744500  |
| C | -1.536546500 | -3.277758500 | -1.605696700 |
| H | 0.111722800  | -1.905057600 | -1.735934600 |
| C | -3.349690300 | -2.646811300 | -0.131237500 |
| H | -3.145147600 | -0.777294100 | 0.889007800  |
| C | -2.776575500 | -3.557650300 | -1.036306000 |
| H | -1.091966600 | -3.998498600 | -2.305991700 |
| H | -3.309947100 | -4.481244800 | -1.284682100 |
| C | 1.436426200  | 1.182553600  | -0.403354800 |
| C | 0.854939000  | 2.124455200  | -1.274977400 |
| C | 2.700391300  | 1.464320700  | 0.180480900  |
| C | 1.535729600  | 3.306744100  | -1.575954000 |
| H | -0.120625900 | 1.921078000  | -1.724002300 |
| C | 3.356415700  | 2.659629000  | -0.117486100 |
| H | 3.140522200  | 0.762077300  | 0.895987400  |
| C | 2.778442600  | 3.576713900  | -1.006156300 |
| H | 1.083974100  | 4.031231500  | -2.265712800 |
| H | 3.309582200  | 4.504028100  | -1.245596200 |
| C | -1.444329200 | 1.173330500  | 0.414202800  |
| C | -0.863563400 | 2.100762700  | 1.298121300  |
| C | -2.706252700 | 1.464627200  | -0.167460800 |

|   |              |              |              |
|---|--------------|--------------|--------------|
| C | -1.543822600 | 3.283454200  | 1.613275500  |
| H | 0.109627400  | 1.890851400  | 1.748304300  |
| C | -3.365026300 | 2.659506400  | 0.145841300  |
| H | -3.146578700 | 0.776005800  | -0.896606400 |
| C | -2.787118700 | 3.562788500  | 1.047140200  |
| H | -1.088421700 | 4.000123000  | 2.309139200  |
| H | -3.314973000 | 4.488693400  | 1.296681100  |
| C | -4.681558500 | -2.987047200 | 0.484980900  |
| H | -5.441478400 | -3.042905900 | -0.305208900 |
| H | -4.610709700 | -3.954908100 | 0.998443800  |
| H | -4.981677400 | -2.221262100 | 1.216350100  |
| C | 4.681142600  | 2.977552700  | 0.502703800  |
| H | 5.446104900  | 3.034624000  | -0.286357800 |
| H | 4.624930000  | 3.947012800  | 1.020895800  |
| H | 4.974718900  | 2.204226400  | 1.229068300  |
| C | -4.688018800 | 2.979424400  | -0.473523700 |
| H | -5.455046400 | 3.034958900  | 0.314766700  |
| H | -4.633230000 | 3.951442800  | -0.988336800 |
| H | -4.981515300 | 2.208949100  | -1.203517800 |
| H | 1.096967600  | -4.028978400 | 2.262591600  |
| C | 4.686830900  | -2.974901300 | -0.515395200 |
| H | 5.458557400  | -3.033061200 | 0.269119800  |
| H | 4.631205700  | -3.945071400 | -1.034670900 |
| H | 4.977863600  | -2.201404800 | -1.243584800 |

### S<sub>1</sub>S<sub>0</sub>-cyc (C4C5)

|   |              |              |              |
|---|--------------|--------------|--------------|
| C | -0.693857200 | -0.136230400 | 0.334750300  |
| C | 0.685333800  | -0.057890100 | 0.013165700  |
| C | -1.384137000 | -1.320584100 | -0.007645200 |
| C | -2.805578600 | -1.355156400 | 0.024331400  |
| C | -0.657149000 | -2.575146100 | -0.268814600 |
| C | -3.441373100 | -2.574775600 | 0.155574600  |
| H | -3.370806900 | -0.434613100 | -0.000135300 |
| C | -1.438114500 | -3.761386300 | -0.307148500 |
| H | -0.034963500 | -2.522475000 | -1.165742000 |
| C | -2.759704300 | -3.818265100 | 0.060996800  |
| H | -3.282446200 | -4.746836800 | 0.236409700  |
| C | 1.466105500  | -1.204405100 | 0.088623100  |
| C | 0.814434400  | -2.301630700 | 0.794283200  |
| C | 2.759993700  | -1.370200800 | -0.493865100 |
| C | 1.533528400  | -3.550337000 | 0.840412700  |
| H | 0.175634200  | -1.984344900 | 1.706317200  |
| C | 3.427410800  | -2.553783000 | -0.380126300 |
| H | 3.180945400  | -0.531077300 | -1.071746400 |
| C | 2.795001000  | -3.624074200 | 0.336858300  |
| H | 1.085336000  | -4.388999900 | 1.364178200  |
| H | 3.385670300  | -4.551262600 | 0.487522200  |
| C | -1.444275900 | 1.103298300  | 0.608975700  |
| C | -1.454980800 | 1.604242500  | 1.921097900  |



|   |              |              |              |
|---|--------------|--------------|--------------|
| C | -2.151348100 | 1.792263300  | -0.392943300 |
| C | -2.148945100 | 2.774465200  | 2.221382600  |
| H | -0.898796800 | 1.072439100  | 2.700101600  |
| C | -2.856489400 | 2.961104600  | -0.087328600 |
| H | -2.156836400 | 1.407956600  | -1.422971400 |
| C | -2.851907800 | 3.455585100  | 1.223773600  |
| H | -2.145133800 | 3.169465400  | 3.245775200  |
| H | -3.394282200 | 4.377765000  | 1.463980100  |
| C | 1.326734800  | 1.212270200  | -0.418491100 |
| C | 0.857340000  | 1.905101100  | -1.541982200 |
| C | 2.404950400  | 1.705682000  | 0.329399100  |
| C | 1.489008900  | 3.083266800  | -1.929542600 |
| H | 0.017995700  | 1.506309000  | -2.119517900 |
| C | 3.014792000  | 2.904880800  | -0.049665100 |
| H | 2.747924200  | 1.160067500  | 1.213689700  |
| C | 2.558025700  | 3.592540500  | -1.184928800 |
| H | 1.139181700  | 3.622872200  | -2.817143600 |
| H | 3.035826200  | 4.532497100  | -1.483124600 |
| C | 4.803301200  | -2.759107300 | -0.919479500 |
| H | 5.034916700  | -1.991533000 | -1.678606300 |
| H | 5.551189400  | -2.685288800 | -0.105457600 |
| H | 4.891074400  | -3.756311000 | -1.390336600 |
| C | -3.641139000 | 3.671134000  | -1.147246700 |
| H | -4.662381100 | 3.260657400  | -1.173392300 |
| H | -3.693134100 | 4.749309800  | -0.931326400 |
| H | -3.170929800 | 3.530225700  | -2.132858400 |
| C | 4.144067200  | 3.457000200  | 0.762095100  |
| H | 4.812061200  | 2.645789300  | 1.087086400  |
| H | 4.727390800  | 4.181576700  | 0.172996400  |
| H | 3.732141400  | 3.963713200  | 1.647358200  |
| H | -0.919034200 | -4.689190900 | -0.625097500 |
| C | -4.919709500 | -2.612625500 | 0.390565300  |
| H | -5.393584000 | -3.150264400 | -0.439334700 |
| H | -5.115631600 | -3.149588300 | 1.326389900  |
| H | -5.339942800 | -1.601601300 | 0.457102800  |

### S<sub>1</sub>S<sub>0</sub>-cyc (C8C9)

|   |              |              |              |
|---|--------------|--------------|--------------|
| C | -0.779093900 | 0.005198700  | 0.516692500  |
| C | 0.644372900  | -0.036477300 | 0.318985700  |
| C | -1.491491900 | -1.114684700 | -0.159745000 |
| C | -2.159405400 | -2.055360000 | 0.643942900  |
| C | -1.535605900 | -1.253750100 | -1.557730600 |
| C | -2.847303800 | -3.122770500 | 0.059848000  |
| H | -2.133664000 | -1.936231900 | 1.733303000  |
| C | -2.212516800 | -2.323676500 | -2.139231700 |
| H | -1.023237500 | -0.523374500 | -2.195384800 |
| C | -2.869697800 | -3.259952400 | -1.334778400 |
| H | -3.398539000 | -4.103018500 | -1.794934500 |
| C | 1.361458700  | -1.288302700 | 0.612138300  |

|   |              |              |              |
|---|--------------|--------------|--------------|
| C | 0.964789100  | -2.042872100 | 1.724538200  |
| C | 2.427716600  | -1.703903700 | -0.198688400 |
| C | 1.659809800  | -3.208389800 | 2.037268800  |
| H | 0.123908600  | -1.695873100 | 2.328702400  |
| C | 3.099194500  | -2.891538600 | 0.107356900  |
| H | 2.709230900  | -1.108517200 | -1.072623700 |
| C | 2.717049200  | -3.636183100 | 1.231568700  |
| H | 1.365303800  | -3.804025200 | 2.907828100  |
| H | 3.249448500  | -4.564518700 | 1.475076600  |
| C | -1.371457000 | 1.288549300  | 0.323851100  |
| C | -0.630851800 | 2.515209900  | 0.633408900  |
| C | -2.710597300 | 1.437207700  | -0.161255300 |
| C | -1.316181000 | 3.758586400  | 0.512751100  |
| H | 0.022797300  | 2.463162400  | 1.504608800  |
| C | -3.272275700 | 2.682102700  | -0.332583900 |
| H | -3.301982500 | 0.538145400  | -0.304481600 |
| C | -2.546986700 | 3.882099700  | -0.079413100 |
| H | -0.780298900 | 4.665295800  | 0.849353300  |
| H | -3.001329400 | 4.845974000  | -0.283232100 |
| C | 1.347468300  | 1.070094400  | -0.147607500 |
| C | 0.546196300  | 2.182749900  | -0.678942600 |
| C | 2.695709700  | 1.325169600  | 0.266024900  |
| C | 1.226870700  | 3.447304800  | -0.891677900 |
| H | -0.169592100 | 1.891306300  | -1.533237100 |
| C | 3.299347000  | 2.526510700  | 0.036626500  |
| H | 3.222151000  | 0.526962800  | 0.814546300  |
| C | 2.546803700  | 3.568178300  | -0.598196900 |
| H | 0.675535600  | 4.257808200  | -1.363440800 |
| H | 3.079362200  | 4.502966100  | -0.857563200 |
| C | 4.215221700  | -3.365316300 | -0.769305600 |
| H | 3.801364200  | -3.703614300 | -1.730339500 |
| H | 4.926461600  | -2.545246200 | -0.947604700 |
| H | 4.752442900  | -4.203845100 | -0.298546600 |
| C | -4.695619700 | 2.804896900  | -0.781276100 |
| H | -5.324200800 | 2.892499800  | 0.114277900  |
| H | -4.825991000 | 3.700926600  | -1.401900200 |
| H | -5.002033700 | 1.920236200  | -1.352464100 |
| C | 4.716998400  | 2.785385600  | 0.428813700  |
| H | 5.160387400  | 3.571518100  | -0.208775100 |
| H | 4.762116500  | 3.118904900  | 1.483828800  |
| H | 5.319917600  | 1.865796000  | 0.324995800  |
| H | -2.231392200 | -2.438995300 | -3.230254000 |
| C | -3.572754500 | -4.121288700 | 0.909207200  |
| H | -3.327705200 | -5.143107700 | 0.583219000  |
| H | -3.288048500 | -4.008682400 | 1.966983900  |
| H | -4.656904700 | -3.958273400 | 0.813056100  |

S<sub>1</sub>S<sub>0</sub>-pyr(C1)

|   |             |             |             |
|---|-------------|-------------|-------------|
| C | 0.843698400 | 1.048168800 | 0.497833400 |
|---|-------------|-------------|-------------|

|   |              |              |              |
|---|--------------|--------------|--------------|
| C | -0.512720500 | 0.668988000  | 0.193706300  |
| C | 1.028308500  | -0.383557300 | 1.002675000  |
| C | 1.787318800  | -1.336995600 | 0.283008500  |
| C | 0.651428600  | -0.665309300 | 2.321845600  |
| C | 2.225517300  | -2.501432300 | 0.924170000  |
| H | 2.049333900  | -1.147101900 | -0.760417000 |
| C | 1.060078900  | -1.850560100 | 2.938409900  |
| H | 0.046496900  | 0.055705000  | 2.885633500  |
| C | 1.862465300  | -2.758107100 | 2.245458800  |
| H | 2.205968800  | -3.673569100 | 2.742466900  |
| C | -0.991915900 | -0.388328000 | -0.739361200 |
| C | -0.551463400 | -0.379022200 | -2.068207900 |
| C | -1.850285700 | -1.402945600 | -0.272326500 |
| C | -1.003404900 | -1.371937300 | -2.941555400 |
| H | 0.129181100  | 0.397568100  | -2.418071700 |
| C | -2.305291300 | -2.383922700 | -1.161065000 |
| H | -2.125073100 | -1.450835700 | 0.786202800  |
| C | -1.884970800 | -2.361788300 | -2.497090000 |
| H | -0.651170600 | -1.379606900 | -3.977641900 |
| H | -2.239419000 | -3.131361700 | -3.193264600 |
| C | 1.701550800  | 1.431593700  | -0.636123600 |
| C | 1.160996300  | 2.264769100  | -1.634226900 |
| C | 3.088818500  | 1.239034700  | -0.606839300 |
| C | 1.988086000  | 2.867406000  | -2.577519000 |
| H | 0.089936600  | 2.497395800  | -1.632605600 |
| C | 3.912404500  | 1.860591800  | -1.545305100 |
| H | 3.526760100  | 0.619048100  | 0.180716000  |
| C | 3.358587200  | 2.659238300  | -2.551912000 |
| H | 1.548870100  | 3.517572700  | -3.347588400 |
| H | 4.005189700  | 3.127011800  | -3.302281700 |
| C | -1.537640300 | 1.293474200  | 1.039052300  |
| C | -1.060818500 | 2.168585500  | 2.027833300  |
| C | -2.914854600 | 1.162628000  | 0.807347000  |
| C | -1.966897200 | 2.877693600  | 2.811147500  |
| H | 0.024792600  | 2.268297700  | 2.109474700  |
| C | -3.808589900 | 1.898496200  | 1.582436800  |
| H | -3.285265000 | 0.532216500  | -0.007914600 |
| C | -3.330763400 | 2.742033100  | 2.594872100  |
| H | -1.601678600 | 3.555083000  | 3.587953700  |
| H | -4.045228600 | 3.311830800  | 3.202140400  |
| C | -3.246848300 | -3.445653500 | -0.687073900 |
| H | -4.106637800 | -3.515895200 | -1.371530900 |
| H | -2.722427500 | -4.411974600 | -0.661288900 |
| H | -3.615557900 | -3.213601000 | 0.324719600  |
| C | 5.399215200  | 1.700704800  | -1.473720100 |
| H | 5.810124800  | 1.490328700  | -2.474473000 |
| H | 5.842159400  | 2.636178300  | -1.094278100 |
| H | 5.670841100  | 0.878323400  | -0.793538200 |
| C | -5.281853400 | 1.815495300  | 1.328591000  |
| H | -5.808791000 | 1.574735500  | 2.263854200  |

|   |              |              |              |
|---|--------------|--------------|--------------|
| H | -5.639225300 | 2.785891100  | 0.952123900  |
| H | -5.505992600 | 1.038905600  | 0.581555900  |
| H | 0.758075100  | -2.062759600 | 3.969142500  |
| C | 3.094982600  | -3.479578500 | 0.191106000  |
| H | 4.115026800  | -3.423941300 | 0.599472800  |
| H | 2.707549700  | -4.501413100 | 0.317841800  |
| H | 3.126734600  | -3.242709600 | -0.883286000 |

S<sub>1</sub>S<sub>0</sub>-pyr (C2)

|   |              |              |              |
|---|--------------|--------------|--------------|
| C | 0.545437500  | -0.641106200 | 0.194852900  |
| C | -0.811530600 | -1.054738200 | 0.446480200  |
| C | 1.550278900  | -1.276848800 | 1.055285500  |
| C | 2.931466300  | -1.126832200 | 0.866248900  |
| C | 1.054843100  | -2.182269200 | 2.007798900  |
| C | 3.808629100  | -1.881975100 | 1.641693700  |
| H | 3.320229200  | -0.466054700 | 0.083645400  |
| C | 1.944955700  | -2.905278200 | 2.796558000  |
| H | -0.032194400 | -2.291134900 | 2.059022300  |
| C | 3.312689500  | -2.758976600 | 2.616396800  |
| H | 4.015206800  | -3.343745500 | 3.222878200  |
| C | -1.639253400 | -1.422281600 | -0.713896200 |
| C | -1.068560600 | -2.216597300 | -1.726896600 |
| C | -3.030145400 | -1.254218800 | -0.702990800 |
| C | -1.869316800 | -2.807004400 | -2.700422200 |
| H | 0.006557400  | -2.427838700 | -1.716606100 |
| C | -3.826394100 | -1.854888300 | -1.677697500 |
| H | -3.492104500 | -0.667230800 | 0.096171400  |
| C | -3.243183000 | -2.618943500 | -2.694734300 |
| H | -1.406807600 | -3.429914200 | -3.479984200 |
| H | -3.870039500 | -3.075652800 | -3.468581000 |
| C | 1.040107500  | 0.451033500  | -0.691471900 |
| C | 0.630047200  | 0.476324300  | -2.030449400 |
| C | 1.881600400  | 1.458707700  | -0.179479300 |
| C | 1.097991400  | 1.492620800  | -2.867740600 |
| H | -0.042327200 | -0.291241000 | -2.415277100 |
| C | 2.356983000  | 2.460411700  | -1.033709700 |
| H | 2.130225500  | 1.483128800  | 0.886619400  |
| C | 1.969228200  | 2.470020700  | -2.379911400 |
| H | 0.761998600  | 1.533359700  | -3.908313600 |
| H | 2.337017000  | 3.259434700  | -3.045396600 |
| C | -1.030215300 | 0.356065400  | 0.991877200  |
| C | -0.681128800 | 0.612145500  | 2.324654900  |
| C | -1.793039900 | 1.313751800  | 0.281635500  |
| C | -1.119658000 | 1.775696600  | 2.961332800  |
| H | -0.071590500 | -0.110275100 | 2.882504500  |
| C | -2.258455300 | 2.456065900  | 0.941688900  |
| H | -2.035979500 | 1.143278200  | -0.769547900 |
| C | -1.921525000 | 2.688565000  | 2.274274100  |
| H | -0.835531800 | 1.969699300  | 4.001093300  |

|   |              |              |              |
|---|--------------|--------------|--------------|
| H | -2.283144200 | 3.589853300  | 2.784494700  |
| C | -5.315205200 | -1.699485200 | -1.642832000 |
| H | -5.690805400 | -1.414211400 | -2.639304400 |
| H | -5.771770300 | -2.658533600 | -1.348064100 |
| H | -5.610232000 | -0.927277600 | -0.914929500 |
| C | 3.288504400  | 3.514102400  | -0.523199200 |
| H | 4.241293300  | 3.463438100  | -1.073669800 |
| H | 2.837419000  | 4.506480200  | -0.669848000 |
| H | 3.489704200  | 3.370934000  | 0.549652300  |
| C | -3.124892400 | 3.440579500  | 0.214766100  |
| H | -4.159770700 | 3.333916500  | 0.571251400  |
| H | -2.776922200 | 4.465932200  | 0.407531200  |
| H | -3.097613700 | 3.254470900  | -0.869086800 |
| H | 1.562888000  | -3.601882400 | 3.547468700  |
| C | 5.286154000  | -1.785555500 | 1.420664400  |
| H | 5.786083200  | -1.496253400 | 2.356835800  |
| H | 5.668207800  | -2.764112500 | 1.092824400  |
| H | 5.517460600  | -1.037226300 | 0.647236500  |

#### S<sub>0</sub>-final (C4C5)

|   |              |              |              |
|---|--------------|--------------|--------------|
| C | -0.711838700 | 0.189210300  | -0.099988200 |
| C | 0.717193500  | 0.187825700  | 0.107229600  |
| C | -1.416128500 | 1.368412600  | -0.094299300 |
| C | -2.839117600 | 1.373299800  | -0.313201500 |
| C | -0.721605300 | 2.657700500  | 0.247595000  |
| C | -3.509712300 | 2.540025300  | -0.521633100 |
| H | -3.360498700 | 0.410192900  | -0.354364600 |
| C | -1.469150900 | 3.843845800  | -0.280739200 |
| H | -0.726126100 | 2.743843600  | 1.387222900  |
| C | -2.777423200 | 3.794285300  | -0.585186400 |
| H | -3.323500400 | 4.682297400  | -0.928333200 |
| C | 1.424393700  | 1.365075900  | 0.098331700  |
| C | 0.731977700  | 2.657636600  | -0.236413900 |
| C | 2.849485800  | 1.365796500  | 0.305554200  |
| C | 1.483603500  | 3.838126900  | 0.299904000  |
| H | 0.743675600  | 2.751619000  | -1.375381300 |
| C | 3.524621000  | 2.530790800  | 0.511948800  |
| H | 3.369229600  | 0.401385100  | 0.335047300  |
| C | 2.794596100  | 3.785529200  | 0.592631800  |
| H | 0.931410000  | 4.783682600  | 0.400104500  |
| H | 3.343034000  | 4.669172400  | 0.942917900  |
| C | -1.390452700 | -1.108544800 | -0.314963600 |
| C | -1.439812500 | -1.663383000 | -1.600629400 |
| C | -1.974738600 | -1.781696900 | 0.767960800  |
| C | -2.081698200 | -2.883442600 | -1.800846900 |
| H | -0.981680900 | -1.132128200 | -2.439894900 |
| C | -2.614427700 | -3.006997500 | 0.561054800  |
| H | -1.919585700 | -1.347249600 | 1.771798900  |
| C | -2.664758500 | -3.559340800 | -0.726430100 |

|   |              |              |              |
|---|--------------|--------------|--------------|
| H | -2.133594300 | -3.316481100 | -2.807237400 |
| H | -3.157681800 | -4.524756100 | -0.888644500 |
| C | 1.392814000  | -1.111719600 | 0.320870100  |
| C | 1.456615300  | -1.658837300 | 1.609271900  |
| C | 1.961145600  | -1.793285900 | -0.765066300 |
| C | 2.098831700  | -2.878747300 | 1.809317500  |
| H | 1.014591000  | -1.118697100 | 2.451530800  |
| C | 2.600116000  | -3.019239600 | -0.558433000 |
| H | 1.896619000  | -1.364013100 | -1.770492800 |
| C | 2.666193100  | -3.563097500 | 0.731800800  |
| H | 2.164685900  | -3.304272900 | 2.818065600  |
| H | 3.158296800  | -4.529099600 | 0.893697200  |
| C | 5.000395800  | 2.571247700  | 0.725390200  |
| H | 5.429912400  | 1.558397000  | 0.683986100  |
| H | 5.467922200  | 3.190882600  | -0.057414700 |
| H | 5.222848300  | 3.014473400  | 1.710229000  |
| C | -3.258202600 | -3.731596000 | 1.702420600  |
| H | -4.350224500 | -3.617715400 | 1.631841700  |
| H | -3.000963500 | -4.800224700 | 1.663476500  |
| H | -2.916396500 | -3.319323300 | 2.664113400  |
| C | 3.188679400  | -3.771515900 | -1.711582600 |
| H | 3.384422800  | -3.093087200 | -2.555921100 |
| H | 4.134107800  | -4.249332900 | -1.413964700 |
| H | 2.475731600  | -4.545579000 | -2.030928100 |
| H | -0.916120200 | 4.790153200  | -0.367581600 |
| C | -4.982790800 | 2.583344900  | -0.752499300 |
| H | -5.459164200 | 3.199318500  | 0.027864600  |
| H | -5.192605300 | 3.032103100  | -1.737591200 |
| H | -5.413757700 | 1.570718700  | -0.721746400 |

### S<sub>0</sub>-final (C8C9)

|   |              |              |              |
|---|--------------|--------------|--------------|
| C | 0.708498800  | 0.196441000  | 0.119279700  |
| C | -0.718139200 | 0.192465700  | -0.107033400 |
| C | 1.385876500  | -1.100982100 | 0.339128600  |
| C | 1.923975000  | -1.803212600 | -0.750061600 |
| C | 1.475841000  | -1.630548100 | 1.633164100  |
| C | 2.553069900  | -3.033516700 | -0.541547900 |
| H | 1.836564000  | -1.388608200 | -1.759924200 |
| C | 2.118840900  | -2.849443700 | 1.837142200  |
| H | 1.049415200  | -1.079239000 | 2.476182100  |
| C | 2.655186200  | -3.554159400 | 0.756071300  |
| H | 3.144726500  | -4.521052800 | 0.919976300  |
| C | -1.387036300 | -1.108353500 | -0.332550600 |
| C | -1.482700200 | -1.628769300 | -1.630088400 |
| C | -1.913893200 | -1.821433000 | 0.754767600  |
| C | -2.113438200 | -2.853216400 | -1.838069900 |
| H | -1.074197100 | -1.063697300 | -2.472902100 |
| C | -2.538139900 | -3.053647100 | 0.540963000  |
| H | -1.820903600 | -1.414783900 | 1.767219300  |

|   |              |              |              |
|---|--------------|--------------|--------------|
| C | -2.636499100 | -3.569965800 | -0.758436000 |
| H | -2.199913600 | -3.260573000 | -2.852746600 |
| H | -3.122622800 | -4.537912400 | -0.927221900 |
| C | 1.409078600  | 1.378069400  | 0.115933200  |
| C | 0.707688500  | 2.657383600  | -0.252462100 |
| C | 2.828514800  | 1.388216200  | 0.352383600  |
| C | 1.472052100  | 3.865154600  | 0.193469100  |
| H | 0.678157500  | 2.704535900  | -1.395159600 |
| C | 3.501449000  | 2.560076600  | 0.520376700  |
| H | 3.344845700  | 0.425087100  | 0.440845000  |
| C | 2.782484100  | 3.822538800  | 0.490343600  |
| H | 0.938019600  | 4.826362900  | 0.197209700  |
| H | 3.338586300  | 4.728410900  | 0.764748200  |
| C | -1.425094400 | 1.370274200  | -0.102375600 |
| C | -0.731585800 | 2.652197000  | 0.271665900  |
| C | -2.842970100 | 1.373634700  | -0.349652100 |
| C | -1.500582800 | 3.857549300  | -0.173568900 |
| H | -0.705503100 | 2.696920600  | 1.414264100  |
| C | -3.519356600 | 2.542284800  | -0.527191900 |
| H | -3.354028400 | 0.407926300  | -0.440697900 |
| C | -2.806321700 | 3.808155000  | -0.491301800 |
| H | -0.971488700 | 4.821564800  | -0.170211400 |
| H | -3.363893600 | 4.711466800  | -0.770951500 |
| C | -3.087678900 | -3.835052000 | 1.693908200  |
| H | -3.285435300 | -3.172317200 | 2.550136500  |
| H | -4.026444600 | -4.332400700 | 1.406866200  |
| H | -2.351504500 | -4.595824600 | 1.991972000  |
| C | 4.972101500  | 2.606149600  | 0.765609800  |
| H | 5.462415100  | 3.177597500  | -0.039762400 |
| H | 5.174669900  | 3.103914100  | 1.728562700  |
| H | 5.396986900  | 1.590626300  | 0.792644700  |
| C | -4.987665500 | 2.581256400  | -0.787582300 |
| H | -5.407644300 | 1.563791400  | -0.817177500 |
| H | -5.488834600 | 3.151845600  | 0.011701600  |
| H | -5.182514100 | 3.076480300  | -1.753433700 |
| H | 2.211431200  | -3.257971200 | 2.850843600  |
| C | 3.149069400  | -3.788032900 | -1.689287200 |
| H | 4.245561600  | -3.711070000 | -1.642534500 |
| H | 2.856510300  | -4.847022600 | -1.636557100 |
| H | 2.802161800  | -3.372190800 | -2.647767600 |

TPE-4oM

S<sub>0</sub>

|   |             |              |              |
|---|-------------|--------------|--------------|
| C | 0.007558900 | -0.469648400 | 0.008598000  |
| C | 0.015936100 | 0.893327200  | 0.006885000  |
| C | 1.255799200 | -1.267159500 | -0.039461200 |

|   |              |              |              |
|---|--------------|--------------|--------------|
| C | 1.561293100  | -2.193626200 | 0.979229400  |
| C | 2.130314900  | -1.138682400 | -1.139485100 |
| C | 2.706422200  | -2.996548900 | 0.874968900  |
| C | 3.269683200  | -1.955666800 | -1.224443500 |
| C | 3.549416800  | -2.885487300 | -0.228710700 |
| H | 4.437210700  | -3.524774200 | -0.307533100 |
| C | 1.244109000  | 1.693666200  | 0.163155200  |
| C | 2.243581500  | 1.302418000  | 1.066689800  |
| C | 1.402377900  | 2.883729700  | -0.563758600 |
| C | 3.372871100  | 2.083198100  | 1.229986400  |
| H | 2.134144900  | 0.370407600  | 1.629349400  |
| C | 2.540748600  | 3.649638600  | -0.399625300 |
| H | 0.620720500  | 3.198550000  | -1.262721300 |
| C | 3.533618700  | 3.258958800  | 0.498408300  |
| H | 4.150184900  | 1.778992200  | 1.942068700  |
| H | 4.430101600  | 3.872280300  | 0.628810100  |
| C | -1.257195600 | -1.242683300 | 0.053404500  |
| C | -2.136191300 | -1.096163500 | 1.147489700  |
| C | -1.570455900 | -2.168712400 | -0.962535400 |
| C | -3.290520400 | -1.892113300 | 1.226341400  |
| C | -2.727787300 | -2.953744200 | -0.860944500 |
| C | -3.578666700 | -2.821742700 | 0.234271100  |
| H | -3.968850900 | -1.776414500 | 2.079920900  |
| H | -4.477656500 | -3.445958200 | 0.310097400  |
| C | -1.224287200 | 1.682900300  | -0.165503400 |
| C | -2.134851400 | 1.340622700  | -1.175640500 |
| C | -1.464504500 | 2.794917600  | 0.649527700  |
| C | -3.282837200 | 2.107320300  | -1.353632100 |
| H | -1.951392100 | 0.467930400  | -1.808533300 |
| C | -2.622500100 | 3.545533000  | 0.471478500  |
| H | -0.743478300 | 3.067851300  | 1.425361900  |
| C | -3.529037900 | 3.203822700  | -0.533113100 |
| H | -3.995796200 | 1.843040000  | -2.141918800 |
| H | -4.436412100 | 3.802950100  | -0.675339500 |
| H | 3.942676500  | -1.858052000 | -2.083596300 |
| H | -2.962680100 | -3.679908400 | -1.648010900 |
| H | 2.935394300  | -3.719698700 | 1.666135800  |
| H | 2.666879800  | 4.574823300  | -0.976506400 |
| H | -2.820913100 | 4.408953900  | 1.115674100  |
| C | 1.921950100  | -0.128772800 | -2.222320400 |
| H | 2.512422900  | 0.767050500  | -1.982005200 |
| H | 2.262179500  | -0.534261200 | -3.189593000 |
| H | 0.863127600  | 0.155574900  | -2.306831600 |
| C | 0.700733100  | -2.326903300 | 2.193324200  |
| H | -0.274978200 | -2.741365100 | 1.911356800  |
| H | 1.175509700  | -2.994195000 | 2.932190200  |
| H | 0.556036600  | -1.336695400 | 2.656674400  |
| C | -1.912737000 | -0.097444200 | 2.238255400  |
| H | -2.458890900 | 0.822977300  | 1.989146900  |
| H | -2.289892300 | -0.492962500 | 3.196437300  |



|   |              |              |              |
|---|--------------|--------------|--------------|
| H | -0.844793800 | 0.141869000  | 2.347955200  |
| C | -0.707961000 | -2.321765200 | -2.174576300 |
| H | -0.552027900 | -1.336785800 | -2.644272400 |
| H | 0.263153500  | -2.744402200 | -1.890374800 |
| H | -1.188369700 | -2.987390500 | -2.911684700 |

S<sub>1</sub>

|   |              |              |              |
|---|--------------|--------------|--------------|
| C | 0.001699700  | -0.473352100 | 0.003663400  |
| C | 0.010016200  | 0.949911200  | 0.002604500  |
| C | 1.183308200  | -1.200267700 | -0.422041900 |
| C | 1.638697500  | -2.302173400 | 0.358228300  |
| C | 1.973170900  | -0.783310700 | -1.521432800 |
| C | 2.850783700  | -2.924245100 | 0.039208100  |
| C | 3.178816200  | -1.436603100 | -1.820713400 |
| C | 3.620380300  | -2.498268400 | -1.040561700 |
| H | 4.568810200  | -2.999097700 | -1.271570200 |
| C | 1.119998400  | 1.667619300  | 0.595813700  |
| C | 1.928122500  | 1.025314300  | 1.557324600  |
| C | 1.481019600  | 2.963169500  | 0.167738200  |
| C | 3.034987700  | 1.668561800  | 2.078308200  |
| H | 1.667179500  | 0.013393100  | 1.887685800  |
| C | 2.602607200  | 3.575631200  | 0.675328000  |
| H | 0.898530600  | 3.457766100  | -0.619737700 |
| C | 3.379504200  | 2.942144000  | 1.649657400  |
| H | 3.654045600  | 1.160741500  | 2.828034000  |
| H | 4.258174500  | 3.448003000  | 2.062155500  |
| C | -1.182350500 | -1.197927400 | 0.423370800  |
| C | -1.974276900 | -0.783198400 | 1.522780600  |
| C | -1.641299700 | -2.296863200 | -0.357411700 |
| C | -3.179022500 | -1.435592200 | 1.821806200  |
| C | -2.850052500 | -2.922556100 | -0.037281900 |
| C | -3.621157200 | -2.497488300 | 1.041819300  |
| H | -3.776508600 | -1.098662300 | 2.678705000  |
| H | -4.569067600 | -2.999206600 | 1.271731400  |
| C | -1.099345500 | 1.672376700  | -0.603990400 |
| C | -1.909798500 | 1.024002800  | -1.561960300 |
| C | -1.470925200 | 2.961050900  | -0.160421000 |
| C | -3.042938700 | 1.670650500  | -2.087667500 |
| H | -1.657353200 | 0.010765300  | -1.891130500 |
| C | -2.613511600 | 3.583055700  | -0.682708900 |
| H | -0.910586000 | 3.452008000  | 0.642598400  |
| C | -3.390085100 | 2.948460700  | -1.657138100 |
| H | -3.659234600 | 1.155894700  | -2.834567100 |
| H | -4.273067700 | 3.451089900  | -2.066519000 |
| H | 3.775073000  | -1.098337500 | -2.676771500 |
| H | -3.199359200 | -3.757159100 | -0.659437500 |
| H | 3.203144200  | -3.755884900 | 0.662527000  |
| H | 2.898015200  | 4.568423900  | 0.311131500  |
| H | -2.903546000 | 4.575228700  | -0.312800400 |

|   |              |              |              |
|---|--------------|--------------|--------------|
| C | 1.515808900  | 0.303612100  | -2.435752300 |
| H | 1.651076400  | 1.275138100  | -1.941849100 |
| H | 2.099608800  | 0.291593700  | -3.371950100 |
| H | 0.449343300  | 0.174755400  | -2.685960400 |
| C | 0.917574800  | -2.782805300 | 1.576374900  |
| H | 0.030452000  | -3.362744700 | 1.285817500  |
| H | 1.583168600  | -3.427033000 | 2.178964300  |
| H | 0.593309800  | -1.933173900 | 2.198899900  |
| C | -1.517061700 | 0.306880900  | 2.433961300  |
| H | -1.649691900 | 1.277469800  | 1.934630000  |
| H | -2.102280200 | 0.300208400  | 3.369325000  |
| H | -0.452370700 | 0.176866100  | 2.684004500  |
| C | -0.916822500 | -2.781546500 | -1.573031900 |
| H | -0.590244800 | -1.934279600 | -2.197066200 |
| H | -0.032034400 | -3.360125100 | -1.276755700 |
| H | -1.581939800 | -3.426301200 | -2.175454200 |

S<sub>1</sub>S<sub>0</sub>-cyc (C4C5)

|   |              |              |              |
|---|--------------|--------------|--------------|
| C | 0.102572700  | -0.712883700 | 0.450552300  |
| C | -0.087461500 | 0.698513800  | 0.244871100  |
| C | -1.074016900 | -1.404003600 | 0.872309000  |
| C | -1.465822200 | -2.731065600 | 0.451091200  |
| C | -1.998755100 | -0.714550100 | 1.800654300  |
| C | -2.714689800 | -3.222496100 | 0.771866400  |
| C | -3.193238000 | -1.398999600 | 2.195213500  |
| C | -3.666088100 | -2.505760300 | 1.530230900  |
| H | -4.659808900 | -2.905762900 | 1.691090800  |
| C | -1.320638700 | 1.340044800  | 0.357636900  |
| C | -2.499821900 | 0.480240700  | 0.535688600  |
| C | -1.397065700 | 2.708218800  | 0.766184200  |
| C | -3.695032200 | 1.112375500  | 1.056556000  |
| H | -2.703003600 | -0.254007000 | -0.336386800 |
| C | -2.553848600 | 3.271606900  | 1.200466000  |
| H | -0.461926500 | 3.298052600  | 0.747061700  |
| C | -3.716520000 | 2.444890500  | 1.299675600  |
| H | -4.598282200 | 0.512489300  | 1.147877400  |
| H | -4.670708800 | 2.930371700  | 1.580680200  |
| C | 0.917934700  | -1.280915200 | -0.658844900 |
| C | 0.546129000  | -1.223288900 | -2.024789200 |
| C | 2.151917100  | -1.889107600 | -0.321046500 |
| C | 1.395717000  | -1.733423500 | -3.011229100 |
| C | 2.987037100  | -2.401131600 | -1.318715500 |
| C | 2.617354800  | -2.315404800 | -2.662674900 |
| H | 1.109505900  | -1.669438100 | -4.070326000 |
| H | 3.280982600  | -2.706213100 | -3.442289600 |
| C | 1.074535600  | 1.508371500  | -0.178679300 |
| C | 2.308932000  | 1.314713800  | 0.449926500  |
| C | 0.926895200  | 2.464214100  | -1.189635800 |
| C | 3.399583100  | 2.097691700  | 0.066234000  |

|   |              |              |              |
|---|--------------|--------------|--------------|
| H | 2.400545300  | 0.560455800  | 1.232371700  |
| C | 2.032830200  | 3.221023300  | -1.581978700 |
| H | -0.039876800 | 2.588439900  | -1.684918600 |
| C | 3.259344900  | 3.043599400  | -0.945475900 |
| H | 4.367624700  | 1.959724100  | 0.556514000  |
| H | 4.122110600  | 3.649620700  | -1.249010000 |
| H | -3.796506600 | -0.946161900 | 3.005217000  |
| H | 3.941071100  | -2.870655000 | -1.046982600 |
| H | -2.995423100 | -4.237516300 | 0.427625200  |
| H | -2.625660300 | 4.324261100  | 1.447939500  |
| H | 1.935211000  | 3.950918600  | -2.390779800 |
| C | -1.299481100 | -0.010266000 | 2.940167200  |
| H | -1.028549300 | 1.016954000  | 2.641373400  |
| H | -1.960524600 | 0.047092600  | 3.822290700  |
| H | -0.374858800 | -0.549421400 | 3.209999800  |
| C | -0.473022900 | -3.692598600 | -0.119264800 |
| H | -0.899765100 | -4.713344300 | -0.155404000 |
| H | -0.196817200 | -3.386657300 | -1.135381100 |
| H | 0.430557600  | -3.713154800 | 0.506328700  |
| C | -0.751220700 | -0.611905600 | -2.449295100 |
| H | -0.682022800 | 0.487520800  | -2.405865400 |
| H | -0.999676200 | -0.906993500 | -3.482394000 |
| H | -1.568440200 | -0.944092300 | -1.786793100 |
| C | 2.554072000  | -2.039253900 | 1.112163800  |
| H | 3.566076300  | -1.626005200 | 1.268015000  |
| H | 1.828184900  | -1.516311500 | 1.746419000  |
| H | 2.566262700  | -3.109755400 | 1.379030800  |

### S<sub>1</sub>S<sub>0</sub>-cyc (C8C9)

|   |              |              |              |
|---|--------------|--------------|--------------|
| C | 0.102835700  | -0.712687100 | 0.450367300  |
| C | -0.086667700 | 0.698774200  | 0.244943000  |
| C | 0.917856000  | -1.281329400 | -0.658924200 |
| C | 2.151905600  | -1.889572900 | -0.321124900 |
| C | 0.545457500  | -1.224187000 | -2.024871300 |
| C | 2.986699300  | -2.402206000 | -1.318666200 |
| C | 1.394847700  | -1.735115400 | -3.011137100 |
| C | 2.616615200  | -2.317079700 | -2.662636500 |
| H | 3.280120200  | -2.708238400 | -3.442247500 |
| C | 1.075001600  | 1.509288200  | -0.178586200 |
| C | 2.309413800  | 1.315717400  | 0.450028300  |
| C | 0.927465300  | 2.465442000  | -1.189012100 |
| C | 3.399890800  | 2.099311200  | 0.066840800  |
| H | 2.400726700  | 0.561030300  | 1.232118100  |
| C | 2.033230400  | 3.222848900  | -1.580934300 |
| H | -0.039683500 | 2.588885700  | -1.684065100 |
| C | 3.259791100  | 3.045646400  | -0.944316900 |
| H | 4.367889000  | 1.961444200  | 0.557308300  |
| H | 4.122151700  | 3.651920300  | -1.247598300 |
| C | -1.073807700 | -1.403912600 | 0.872134500  |

|   |              |              |              |
|---|--------------|--------------|--------------|
| C | -1.998412400 | -0.714538500 | 1.800387800  |
| C | -1.466282100 | -2.730942100 | 0.450582300  |
| C | -3.192512200 | -1.398532200 | 2.194913400  |
| C | -2.715111900 | -3.222075700 | 0.771733700  |
| C | -3.666161200 | -2.505216400 | 1.529845200  |
| H | -3.795439500 | -0.945572700 | 3.004985200  |
| H | -4.659976800 | -2.904667100 | 1.691145700  |
| C | -1.320303700 | 1.339531200  | 0.358392100  |
| C | -2.499508800 | 0.479685300  | 0.535813200  |
| C | -1.397015800 | 2.707822700  | 0.766911600  |
| C | -3.694949800 | 1.111870200  | 1.056481300  |
| H | -2.702512900 | -0.254425500 | -0.336086500 |
| C | -2.554248600 | 3.270932200  | 1.200634900  |
| H | -0.462365300 | 3.298430200  | 0.748179300  |
| C | -3.716965700 | 2.444142900  | 1.299195300  |
| H | -4.598006700 | 0.511781500  | 1.147668900  |
| H | -4.671277900 | 2.929430300  | 1.579703400  |
| H | 1.107832700  | -1.671628200 | -4.069992600 |
| H | -2.995342800 | -4.237266700 | 0.427634800  |
| H | 3.940751900  | -2.871627800 | -1.047208900 |
| H | 1.935817200  | 3.952795900  | -2.389673500 |
| H | -2.626682600 | 4.323536600  | 1.448088400  |
| C | -0.751680800 | -0.612745600 | -2.449738200 |
| H | -0.682106500 | 0.486566900  | -2.406128900 |
| H | -0.999671200 | -0.907798500 | -3.482894400 |
| H | -1.569342800 | -0.944742000 | -1.787818000 |
| C | 2.554081900  | -2.039095100 | 1.112133200  |
| H | 1.828311700  | -1.515656300 | 1.745813200  |
| H | 2.566050500  | -3.109576000 | 1.379606500  |
| H | 3.566162200  | -1.625847700 | 1.267442600  |
| C | -1.298372000 | -0.009984300 | 2.939336200  |
| H | -1.027223800 | 1.017052600  | 2.640081300  |
| H | -1.958726800 | 0.048007300  | 3.821905300  |
| H | -0.373884300 | -0.549456400 | 3.208654000  |
| C | -0.473711800 | -3.692862200 | -0.119515900 |
| H | -0.197222400 | -3.387218600 | -1.135348200 |
| H | 0.429624600  | -3.713718200 | 0.506386300  |
| H | -0.900941300 | -4.713515200 | -0.155706300 |

### S<sub>1</sub>S<sub>0</sub>-pyr(C1)

|   |             |             |             |
|---|-------------|-------------|-------------|
| C | 0.00792910  | -0.00359750 | 0.00419210  |
| C | 1.44643430  | -0.06133480 | -0.03004980 |
| C | -0.78335850 | -1.09178590 | 0.59893800  |
| C | -2.08087840 | -1.38992030 | 0.11350360  |
| C | -0.42805550 | -1.62836450 | 1.86236110  |
| C | -2.89963550 | -2.30915540 | 0.77964100  |
| C | -1.26703510 | -2.54479700 | 2.51482490  |
| C | -2.47782310 | -2.92811840 | 1.95396570  |
| H | -3.10968580 | -3.67243640 | 2.44949830  |

|   |             |             |             |
|---|-------------|-------------|-------------|
| C | 2.14409640  | 1.16765460  | 0.42301390  |
| C | 1.40481700  | 1.99487870  | 1.26842380  |
| C | 3.50394970  | 1.45149720  | 0.17032250  |
| C | 2.01868260  | 3.08950890  | 1.86300770  |
| H | 0.35694660  | 1.74469280  | 1.43838830  |
| C | 4.10444570  | 2.54831800  | 0.76804630  |
| H | 4.09364540  | 0.80901810  | -0.49488720 |
| C | 3.36602460  | 3.36892040  | 1.60616370  |
| H | 1.45157750  | 3.73179490  | 2.54597500  |
| H | 3.83871640  | 4.24328850  | 2.07254470  |
| C | 0.14715270  | -0.00225700 | -1.53095660 |
| C | 0.05542500  | 1.27212500  | -2.15967360 |
| C | 0.07673950  | -1.16664950 | -2.34134810 |
| C | -0.03518470 | 1.36316020  | -3.56250840 |
| C | -0.04651960 | -1.04212700 | -3.74189030 |
| C | -0.08378990 | 0.21437920  | -4.34283810 |
| H | -0.10074170 | 2.35017460  | -4.03415940 |
| H | -0.17014020 | 0.29498670  | -5.43591430 |
| C | 2.40175230  | -1.07895730 | -0.57543660 |
| C | 2.65387780  | -2.26909230 | 0.12908010  |
| C | 3.07279260  | -0.85145690 | -1.78681720 |
| C | 3.57470180  | -3.17560470 | -0.35458860 |
| H | 2.11089280  | -2.47923430 | 1.05178480  |
| C | 3.99343700  | -1.76216420 | -2.25768930 |
| H | 2.81828320  | 0.03252210  | -2.38096030 |
| C | 4.26591360  | -2.93029600 | -1.53813200 |
| H | 3.76062120  | -4.10649540 | 0.19539620  |
| H | 4.99691350  | -3.64989760 | -1.91241870 |
| H | -0.95900080 | -2.96517540 | 3.48269720  |
| H | -0.11108220 | -1.94471250 | -4.35780970 |
| H | -3.89722930 | -2.53549740 | 0.37686010  |
| H | 5.15417750  | 2.77361670  | 0.56631940  |
| H | 4.51239960  | -1.57905210 | -3.20518460 |
| C | 0.76014730  | -1.17091560 | 2.64690870  |
| H | 0.41274930  | -0.43519060 | 3.39292960  |
| H | 1.23055600  | -2.01626220 | 3.18328020  |
| H | 1.52107860  | -0.67785160 | 2.02373260  |
| C | -2.65085920 | -0.70059150 | -1.08516600 |
| H | -2.28729580 | -1.17383390 | -2.00912670 |
| H | -3.75553200 | -0.76152100 | -1.06743620 |
| H | -2.35115930 | 0.35504720  | -1.08103700 |
| C | -0.03407030 | 2.53354420  | -1.37173860 |
| H | 0.97658550  | 2.91418340  | -1.14110080 |
| H | -0.57493870 | 3.30400410  | -1.95052980 |
| H | -0.57120540 | 2.33287500  | -0.43744800 |
| C | 0.14944450  | -2.56037520 | -1.81105970 |
| H | 1.09151050  | -3.03091070 | -2.14579350 |
| H | 0.09575520  | -2.58472660 | -0.71811220 |
| H | -0.69418590 | -3.14566010 | -2.21537620 |

S<sub>1</sub>S<sub>0</sub>-pyr (C2)

|   |              |              |              |
|---|--------------|--------------|--------------|
| C | 0.035648300  | -0.103713300 | -0.014378100 |
| C | 1.481578100  | -0.037595700 | 0.030341200  |
| C | -0.617274200 | -0.138371100 | -1.329316800 |
| C | -2.036390300 | -0.327053900 | -1.475806900 |
| C | 0.145797000  | -0.069876100 | -2.538827900 |
| C | -2.635533200 | -0.227545300 | -2.725303300 |
| C | -0.500884500 | 0.019546900  | -3.778794500 |
| C | -1.883528600 | 0.001709700  | -3.877922500 |
| H | -2.380522300 | 0.115410900  | -4.849129800 |
| C | 2.197096800  | -0.873455300 | 1.027593000  |
| C | 2.149702000  | -2.259908100 | 0.780625100  |
| C | 3.211668500  | -0.407774200 | 1.878424900  |
| C | 2.988870800  | -3.141403700 | 1.449511700  |
| H | 1.444592700  | -2.651566800 | 0.034528100  |
| C | 4.063563600  | -1.292545700 | 2.531925600  |
| H | 3.362186200  | 0.667705100  | 2.012747100  |
| C | 3.946852500  | -2.663879700 | 2.341428800  |
| H | 2.910790500  | -4.221743300 | 1.259499200  |
| H | 4.617844000  | -3.358399400 | 2.856905400  |
| C | -0.910349800 | 0.098432200  | 1.140061800  |
| C | -1.063823200 | -0.859081200 | 2.167093500  |
| C | -1.571625700 | 1.345773600  | 1.241142500  |
| C | -1.827885400 | -0.539145500 | 3.304846700  |
| C | -2.307535400 | 1.646326200  | 2.404601000  |
| C | -2.424855900 | 0.713243200  | 3.431034100  |
| H | -1.930011400 | -1.280382600 | 4.103536600  |
| H | -3.000998000 | 0.957787800  | 4.331856900  |
| C | 1.383056200  | 1.434101800  | 0.511704200  |
| C | 1.627405000  | 2.422071600  | -0.456896700 |
| C | 1.296689800  | 1.813544100  | 1.867651400  |
| C | 1.792866600  | 3.737487000  | -0.077333000 |
| H | 1.700626500  | 2.137983100  | -1.508960700 |
| C | 1.466984300  | 3.131338500  | 2.234538500  |
| H | 1.084777400  | 1.053405300  | 2.625379300  |
| C | 1.723787000  | 4.105277400  | 1.269503900  |
| H | 1.988092800  | 4.507507500  | -0.835335700 |
| H | 1.871990300  | 5.149385500  | 1.562904500  |
| H | 0.103492200  | 0.091269600  | -4.685680500 |
| H | -3.720122700 | -0.344028300 | -2.817938300 |
| H | -2.799386700 | 2.620588200  | 2.487781300  |
| H | 1.405924200  | 3.420236000  | 3.290570000  |
| H | 4.841277300  | -0.902384200 | 3.203835500  |
| C | -2.972853400 | -0.746861700 | -0.381633100 |
| H | -2.484652700 | -1.444718500 | 0.303261200  |
| H | -3.316575100 | 0.130598100  | 0.171512000  |
| H | -3.850188300 | -1.252818200 | -0.821787000 |
| C | 1.639463600  | -0.128390200 | -2.580252100 |
| H | 1.979178800  | -0.158694300 | -1.532545500 |

|   |              |              |              |
|---|--------------|--------------|--------------|
| H | 1.909900700  | -1.034532500 | -3.150210700 |
| H | 2.023088200  | 0.743362200  | -3.141628100 |
| C | -0.508453400 | -2.239266800 | 2.063741700  |
| H | -0.573487100 | -2.617058600 | 1.028441400  |
| H | 0.540618200  | -2.232392500 | 2.375513100  |
| H | -1.074673400 | -2.924716500 | 2.717158800  |
| C | -1.507092400 | 2.416078700  | 0.199216500  |
| H | -2.535674500 | 2.729398300  | -0.055344500 |
| H | -0.964275800 | 3.284001200  | 0.603151000  |
| H | -1.008311900 | 2.087950000  | -0.721879700 |

### S<sub>0</sub>-final (C4C5)

|   |              |              |              |
|---|--------------|--------------|--------------|
| C | -0.056881500 | -0.531583900 | 0.025639900  |
| C | -0.040898700 | 0.914553700  | -0.140537900 |
| C | -1.245305300 | -1.193403400 | 0.191837100  |
| C | -1.336395500 | -2.635840500 | 0.391524500  |
| C | -2.539370100 | -0.405332800 | 0.281578500  |
| C | -2.531460500 | -3.273197300 | 0.231962300  |
| C | -3.729370100 | -1.213663400 | -0.163347800 |
| C | -3.720048700 | -2.557463000 | -0.160437500 |
| H | -4.597070900 | -3.143666800 | -0.461000000 |
| C | -1.192238700 | 1.619901000  | -0.362667700 |
| C | -2.481893500 | 0.881354200  | -0.568904800 |
| C | -1.168744600 | 3.055734700  | -0.513735300 |
| C | -3.668284500 | 1.764886500  | -0.344708500 |
| H | -2.512832000 | 0.571504800  | -1.670270700 |
| C | -2.318938300 | 3.769585500  | -0.561932700 |
| H | -0.193878000 | 3.554515400  | -0.563191700 |
| C | -3.592410300 | 3.106536600  | -0.388452600 |
| H | -4.640776100 | 1.277886300  | -0.181806800 |
| H | -4.478734400 | 3.738377700  | -0.254623000 |
| C | 1.267296600  | -1.180092000 | -0.095155100 |
| C | 1.684087600  | -1.652292700 | -1.357775700 |
| C | 2.137045800  | -1.280247000 | 1.008738800  |
| C | 2.944301500  | -2.241453700 | -1.499757100 |
| C | 3.396152400  | -1.870093400 | 0.847875900  |
| C | 3.797947700  | -2.345315000 | -0.400429100 |
| H | 3.261489300  | -2.627979300 | -2.475358500 |
| H | 4.789116700  | -2.798614700 | -0.520087000 |
| C | 1.255112400  | 1.624343000  | -0.021464800 |
| C | 1.528482200  | 2.366988000  | 1.140626800  |
| C | 2.198285000  | 1.577611000  | -1.059656900 |
| C | 2.733039400  | 3.055393000  | 1.257850700  |
| H | 0.783572400  | 2.412291800  | 1.941238500  |
| C | 3.400240000  | 2.268771800  | -0.932770700 |
| H | 1.992562300  | 0.985590700  | -1.955190600 |
| C | 3.672807400  | 3.004708800  | 0.224742400  |
| H | 2.942231700  | 3.647989000  | 2.155529700  |
| H | 4.623645600  | 3.540099700  | 0.322841000  |

|   |              |              |              |
|---|--------------|--------------|--------------|
| H | -4.640472200 | -0.670128500 | -0.447964800 |
| H | 4.075307800  | -1.948291800 | 1.704623900  |
| H | -2.615581200 | -4.357976400 | 0.375051100  |
| H | -2.316242100 | 4.857998400  | -0.686627600 |
| H | 4.141128600  | 2.231171700  | -1.739265400 |
| C | -2.739487800 | -0.069660100 | 1.770422900  |
| H | -1.907516700 | 0.556849900  | 2.123567000  |
| H | -3.682755700 | 0.475535400  | 1.918820200  |
| H | -2.768772500 | -0.995569900 | 2.362383500  |
| C | -0.149710400 | -3.465695200 | 0.765565000  |
| H | -0.469751400 | -4.483679500 | 1.050575100  |
| H | 0.543443500  | -3.541879900 | -0.082545300 |
| H | 0.371470100  | -3.011955100 | 1.619407500  |
| C | 0.761062000  | -1.561059600 | -2.532345700 |
| H | 0.414207600  | -0.523796700 | -2.653368600 |
| H | 1.271811000  | -1.880359200 | -3.455330100 |
| H | -0.109146700 | -2.208667100 | -2.360733000 |
| C | 1.736841400  | -0.745925200 | 2.347596700  |
| H | 2.084772800  | 0.293928600  | 2.425668400  |
| H | 0.644364500  | -0.770291100 | 2.461033400  |
| H | 2.196104600  | -1.342070300 | 3.152141900  |

#### S<sub>0</sub>-final (C8C9)

|   |              |              |              |
|---|--------------|--------------|--------------|
| C | -0.061976800 | -0.532315400 | 0.021965200  |
| C | -0.032376600 | 0.915430500  | -0.123187200 |
| C | 1.256573600  | -1.192089400 | -0.097700000 |
| C | 2.124788200  | -1.303145600 | 1.006088700  |
| C | 1.670403800  | -1.663966400 | -1.361334700 |
| C | 3.379350200  | -1.902021000 | 0.843937400  |
| C | 2.927510800  | -2.259108000 | -1.505246600 |
| C | 3.780396100  | -2.373336200 | -0.406042400 |
| H | 4.769217700  | -2.830543500 | -0.527652400 |
| C | 1.271283300  | 1.611356600  | -0.007314000 |
| C | 1.560489000  | 2.341775600  | 1.158401600  |
| C | 2.204402500  | 1.567431800  | -1.054663400 |
| C | 2.770896800  | 3.021125600  | 1.270441100  |
| H | 0.823017500  | 2.385632800  | 1.965919000  |
| C | 3.412223700  | 2.249806000  | -0.933262600 |
| H | 1.986304000  | 0.983882500  | -1.952849300 |
| C | 3.700561000  | 2.973724900  | 0.227948300  |
| H | 2.991712600  | 3.605768100  | 2.170448300  |
| H | 4.653998100  | 3.505336400  | 0.319963600  |
| C | -1.256270600 | -1.185851500 | 0.179391500  |
| C | -2.543129000 | -0.387442200 | 0.271240500  |
| C | -1.360722900 | -2.628754600 | 0.368829300  |
| C | -3.737272200 | -1.180828700 | -0.189497800 |
| C | -2.560600900 | -3.253102400 | 0.196723900  |
| C | -3.740169300 | -2.524641200 | -0.200305100 |
| H | -4.640621100 | -0.625785200 | -0.476541600 |



|   |              |              |              |
|---|--------------|--------------|--------------|
| H | -4.616464000 | -3.101061600 | -0.519869200 |
| C | -1.176750400 | 1.633910300  | -0.341690800 |
| C | -2.472821400 | 0.909498200  | -0.559524400 |
| C | -1.140115800 | 3.069719400  | -0.491049300 |
| C | -3.650969800 | 1.801308300  | -0.324075900 |
| H | -2.505235300 | 0.627908000  | -1.669528700 |
| C | -2.283629700 | 3.793765200  | -0.541248800 |
| H | -0.160898100 | 3.560029900  | -0.536326000 |
| C | -3.563506900 | 3.142329000  | -0.368213400 |
| H | -4.626785100 | 1.322024400  | -0.159309100 |
| H | -4.443051400 | 3.782351200  | -0.230085200 |
| H | 3.241172200  | -2.645385000 | -2.482107800 |
| H | -2.654901700 | -4.338101600 | 0.332317000  |
| H | 4.055021600  | -1.991297500 | 1.702376900  |
| H | 4.146093200  | 2.212310100  | -1.746019400 |
| H | -2.271594800 | 4.881962600  | -0.665310600 |
| C | 0.749042800  | -1.562211800 | -2.535622200 |
| H | 0.410159300  | -0.522304100 | -2.657386700 |
| H | 1.258732600  | -1.882867300 | -3.459309200 |
| H | -0.127267000 | -2.203143400 | -2.370200900 |
| C | 1.725723100  | -0.776335700 | 2.347617700  |
| H | 0.632777800  | -0.794373200 | 2.460238600  |
| H | 2.178018000  | -1.382865200 | 3.148752200  |
| H | 2.078986400  | 0.260582100  | 2.438498700  |
| C | -2.750694200 | -0.072809100 | 1.764031000  |
| H | -1.918056700 | 0.544187300  | 2.132253600  |
| H | -3.690444100 | 0.477638700  | 1.915768000  |
| H | -2.789731100 | -1.007689600 | 2.340780600  |
| C | -0.186157700 | -3.469970700 | 0.752406000  |
| H | 0.522941400  | -3.544717700 | -0.082287800 |
| H | 0.323218200  | -3.032106800 | 1.621843400  |
| H | -0.519330300 | -4.489209200 | 1.019527200  |
| C | -0.042730038 | -0.520949174 | 0.017677113  |
| C | -0.017886723 | 0.953394720  | -0.102834233 |
| C | 1.287062566  | -1.205703760 | -0.118239383 |
| C | 2.171565605  | -1.312035123 | 0.970145122  |
| C | 1.656471155  | -1.715420749 | -1.380691569 |
| C | 3.411643714  | -1.930440123 | 0.782728527  |
| C | 2.905212821  | -2.321439747 | -1.534196215 |
| C | 3.782254641  | -2.429545256 | -0.459276815 |
| H | 4.748110501  | -2.905138011 | -0.590098335 |
| C | 1.282215276  | 1.688716226  | 0.015832012  |
| C | 1.530765591  | 2.485485255  | 1.141898494  |
| C | 2.250496514  | 1.648197024  | -0.995138777 |
| C | 2.715888013  | 3.209202798  | 1.261804465  |
| H | 0.781761705  | 2.536289684  | 1.924964874  |
| C | 3.435797147  | 2.369763292  | -0.877364867 |
| H | 2.075064170  | 1.046922571  | -1.878878129 |
| C | 3.674415906  | 3.150449571  | 0.252487258  |
| H | 2.887984572  | 3.819098448  | 2.141934336  |

|   |              |              |              |
|---|--------------|--------------|--------------|
| H | 4.598035309  | 3.711156788  | 0.343291229  |
| C | -1.217496756 | -1.198796129 | 0.183396492  |
| C | -2.537677081 | -0.404166104 | 0.306898546  |
| C | -1.329504984 | -2.665813430 | 0.387674174  |
| C | -3.721578055 | -1.206633609 | -0.205858854 |
| C | -2.526184700 | -3.267323267 | 0.179319394  |
| C | -3.708765806 | -2.542248616 | -0.241763109 |
| H | -4.610707988 | -0.661527030 | -0.500467235 |
| H | -4.577765497 | -3.102935137 | -0.569673035 |
| C | -1.163198413 | 1.652860552  | -0.331498274 |
| C | -2.466316830 | 0.902470999  | -0.523043115 |
| C | -1.177393857 | 3.096459262  | -0.532944748 |
| C | -3.680799673 | 1.787684135  | -0.343280471 |
| H | -2.476810473 | 0.568564330  | -1.584205471 |
| C | -2.330567329 | 3.793228660  | -0.589084024 |
| H | -0.227023143 | 3.608136201  | -0.613027887 |
| C | -3.611500340 | 3.123903310  | -0.413634515 |
| H | -4.643168868 | 1.308681949  | -0.205672110 |
| H | -4.508542525 | 3.728220918  | -0.330475138 |
| H | 3.187039839  | -2.713377284 | -2.506040515 |
| H | -2.608355222 | -4.339842088 | 0.322856910  |
| H | 4.087529233  | -2.021168346 | 1.627043327  |
| H | 4.173335355  | 2.323078122  | -1.670895145 |
| H | -2.315614712 | 4.868009683  | -0.731412913 |
| C | 0.718254122  | -1.632930996 | -2.561067456 |
| H | 0.366781601  | -0.609867910 | -2.731419815 |
| H | 1.213930408  | -1.977564072 | -3.472131039 |
| H | -0.173504752 | -2.249601099 | -2.407879564 |
| C | 1.814166387  | -0.794345058 | 2.341813854  |
| H | 0.734374729  | -0.792456176 | 2.507548173  |
| H | 2.278940352  | -1.407336961 | 3.119626446  |
| H | 2.166243977  | 0.233576312  | 2.476859734  |
| C | -2.761054064 | -0.103097510 | 1.816544997  |
| H | -1.944417901 | 0.512148281  | 2.206084599  |
| H | -3.702148254 | 0.429064695  | 1.978832700  |
| H | -2.793339665 | -1.041043941 | 2.376672738  |
| C | -0.184177256 | -3.536433160 | 0.854119825  |
| H | 0.588289253  | -3.673763430 | 0.094948437  |
| H | 0.307740575  | -3.120079824 | 1.736258420  |
| H | -0.570027865 | -4.524210654 | 1.120811251  |

### B3LYP method

TPE-4mM

S<sub>0</sub>

|   |             |             |             |
|---|-------------|-------------|-------------|
| C | 0.682811000 | 0.001607000 | 0.000364000 |
|---|-------------|-------------|-------------|

|   |              |              |              |
|---|--------------|--------------|--------------|
| C | -0.682817000 | 0.001577000  | -0.000413000 |
| C | 1.490115000  | -1.250944000 | 0.128606000  |
| C | 2.561279000  | -1.496648000 | -0.748525000 |
| C | 1.244134000  | -2.177392000 | 1.153338000  |
| C | 3.355114000  | -2.642090000 | -0.645918000 |
| H | 2.774275000  | -0.773277000 | -1.531903000 |
| C | 2.037190000  | -3.317519000 | 1.277940000  |
| H | 0.433142000  | -1.998257000 | 1.852031000  |
| C | 3.081429000  | -3.552605000 | 0.384891000  |
| H | 3.695315000  | -4.444639000 | 0.491070000  |
| C | -1.490061000 | -1.251015000 | -0.128644000 |
| C | -1.244034000 | -2.177461000 | -1.153375000 |
| C | -2.561193000 | -1.496787000 | 0.748501000  |
| C | -2.037012000 | -3.317640000 | -1.277949000 |
| H | -0.433066000 | -1.998266000 | -1.852079000 |
| C | -3.354959000 | -2.642282000 | 0.645919000  |
| H | -2.774233000 | -0.773437000 | 1.531886000  |
| C | -3.081225000 | -3.552791000 | -0.384878000 |
| H | -1.842053000 | -4.023813000 | -2.081166000 |
| H | -3.695031000 | -4.444881000 | -0.491057000 |
| C | 1.490983000  | 1.253598000  | -0.127499000 |
| C | 1.243759000  | 2.182187000  | -1.150363000 |
| C | 2.560491000  | 1.499482000  | 0.751235000  |
| C | 2.032656000  | 3.325423000  | -1.269919000 |
| H | 0.430983000  | 2.005176000  | -1.847489000 |
| C | 3.354129000  | 2.645506000  | 0.649891000  |
| H | 2.771368000  | 0.777302000  | 1.536338000  |
| C | 3.075537000  | 3.560760000  | -0.374930000 |
| H | 1.831755000  | 4.037276000  | -2.066617000 |
| H | 3.682675000  | 4.458225000  | -0.473424000 |
| C | -1.491051000 | 1.253524000  | 0.127483000  |
| C | -1.243909000 | 2.182073000  | 1.150397000  |
| C | -2.560562000 | 1.499390000  | -0.751261000 |
| C | -2.032899000 | 3.325243000  | 1.270012000  |
| H | -0.431135000 | 2.005078000  | 1.847529000  |
| C | -3.354276000 | 2.645350000  | -0.649871000 |
| H | -2.771385000 | 0.777236000  | -1.536402000 |
| C | -3.075782000 | 3.560556000  | 0.375027000  |
| H | -1.832078000 | 4.037052000  | 2.066769000  |
| H | -3.683000000 | 4.457960000  | 0.473585000  |
| C | -4.475474000 | -2.901563000 | 1.627273000  |
| H | -5.392550000 | -3.216247000 | 1.115397000  |
| H | -4.211809000 | -3.700423000 | 2.333017000  |
| H | -4.707487000 | -2.007349000 | 2.214405000  |
| C | 4.502654000  | 2.880672000  | 1.604695000  |
| H | 5.465481000  | 2.629169000  | 1.140113000  |
| H | 4.559355000  | 3.930716000  | 1.913881000  |
| H | 4.405544000  | 2.267850000  | 2.506577000  |
| C | -4.502713000 | 2.880597000  | -1.604762000 |
| H | -5.465789000 | 2.631324000  | -1.139509000 |

|   |              |              |              |
|---|--------------|--------------|--------------|
| H | -4.557947000 | 3.930210000  | -1.915706000 |
| H | -4.406715000 | 2.266138000  | -2.505642000 |
| H | 1.842257000  | -4.023686000 | 2.081167000  |
| C | 4.475646000  | -2.901331000 | -1.627261000 |
| H | 5.392701000  | -3.216073000 | -1.115387000 |
| H | 4.211961000  | -3.700123000 | -2.333075000 |
| H | 4.707705000  | -2.007088000 | -2.214334000 |

S<sub>0</sub>-final (C4C5)

|   |              |             |              |
|---|--------------|-------------|--------------|
| C | 0.729304000  | 0.118881000 | 0.067922000  |
| C | -0.731429000 | 0.116496000 | -0.068020000 |
| C | 1.431752000  | 1.298634000 | -0.042452000 |
| C | 2.863091000  | 1.387600000 | 0.133492000  |
| C | 0.655954000  | 2.572586000 | -0.393038000 |
| C | 3.541452000  | 2.566200000 | 0.125285000  |
| H | 3.406796000  | 0.467980000 | 0.323450000  |
| C | 1.477542000  | 3.831976000 | -0.257733000 |
| H | 0.370900000  | 2.500215000 | -1.465677000 |
| C | 2.804393000  | 3.814351000 | -0.057411000 |
| H | 3.362300000  | 4.748431000 | -0.019764000 |
| C | -1.437872000 | 1.293721000 | 0.043481000  |
| C | -0.666399000 | 2.569719000 | 0.396224000  |
| C | -2.869435000 | 1.378135000 | -0.133154000 |
| C | -1.492239000 | 3.826535000 | 0.262741000  |
| H | -0.381138000 | 2.496670000 | 1.468730000  |
| C | -3.551703000 | 2.554463000 | -0.123587000 |
| H | -3.409935000 | 0.456968000 | -0.324659000 |
| C | -2.818904000 | 3.804759000 | 0.061613000  |
| H | -0.987246000 | 4.775434000 | 0.418609000  |
| H | -3.379892000 | 4.737042000 | 0.025219000  |
| C | 1.428327000  | 1.177901000 | 0.332554000  |
| C | 1.199453000  | 1.880777000 | 1.523823000  |
| C | 2.318921000  | 1.727164000 | -0.603404000 |
| C | 1.849285000  | 3.090718000 | 1.765481000  |
| H | 0.512091000  | 1.474880000 | 2.260556000  |
| C | 2.979367000  | 2.939809000 | -0.377227000 |
| H | 2.492327000  | 1.193649000 | -1.535413000 |
| C | 2.731346000  | 3.618249000 | 0.823313000  |
| H | 1.665206000  | 3.626456000 | 2.693439000  |
| H | 3.229111000  | 4.565965000 | 1.018217000  |
| C | -1.425525000 | 1.182686000 | -0.334055000 |
| C | -1.197208000 | 1.881018000 | -1.528539000 |
| C | -2.315569000 | 1.735139000 | 0.599907000  |
| C | -1.849794000 | 3.087852000 | -1.776058000 |
| H | -0.513659000 | 1.469871000 | -2.265911000 |
| C | -2.974032000 | 2.948733000 | 0.370620000  |
| H | -2.492598000 | 1.202229000 | 1.531614000  |
| C | -2.732453000 | 3.618494000 | -0.835626000 |
| H | -1.673259000 | 3.615562000 | -2.710042000 |

|   |              |             |              |
|---|--------------|-------------|--------------|
| H | -3.237623000 | 4.560601000 | -1.038062000 |
| C | -5.040459000 | 2.621885000 | -0.331506000 |
| H | -5.470811000 | 1.628737000 | -0.491857000 |
| H | -5.544442000 | 3.073628000 | 0.534601000  |
| H | -5.293327000 | 3.246691000 | -1.199619000 |
| C | 3.946974000  | 3.498637000 | -1.395772000 |
| H | 4.988755000  | 3.352647000 | -1.080300000 |
| H | 3.802645000  | 4.576033000 | -1.537216000 |
| H | 3.828621000  | 3.012365000 | -2.369501000 |
| C | -3.900268000 | 3.536149000 | 1.411260000  |
| H | -4.276537000 | 2.767060000 | 2.093907000  |
| H | -4.762788000 | 4.029121000 | 0.948657000  |
| H | -3.386365000 | 4.291122000 | 2.021399000  |
| H | 0.969205000  | 4.779397000 | -0.411640000 |
| C | 5.030151000  | 2.638189000 | 0.332120000  |
| H | 5.532073000  | 3.091867000 | -0.534181000 |
| H | 5.281751000  | 3.263373000 | 1.200318000  |
| H | 5.463715000  | 1.646296000 | 0.491609000  |

#### S<sub>0</sub>-final (C8C9)

|   |              |              |              |
|---|--------------|--------------|--------------|
| C | -0.729431000 | 0.118352000  | -0.067891000 |
| C | 0.731281000  | 0.117209000  | 0.067927000  |
| C | -1.427292000 | -1.179036000 | -0.332642000 |
| C | -2.316761000 | -1.729522000 | 0.603441000  |
| C | -1.197894000 | -1.881408000 | -1.524283000 |
| C | -2.975828000 | -2.943086000 | 0.377146000  |
| H | -2.490288000 | -1.196518000 | 1.535747000  |
| C | -1.846082000 | -3.092068000 | -1.765904000 |
| H | -0.511119000 | -1.474499000 | -2.261009000 |
| C | -2.727132000 | -3.620996000 | -0.823355000 |
| H | -3.223410000 | -4.569520000 | -1.017990000 |
| C | 1.426455000  | -1.181389000 | 0.334148000  |
| C | 1.199013000  | -1.879316000 | 1.529103000  |
| C | 2.316554000  | -1.733561000 | -0.599810000 |
| C | 1.852573000  | -3.085476000 | 1.777021000  |
| H | 0.515434000  | -1.468233000 | 2.266483000  |
| C | 2.975950000  | -2.946661000 | -0.370152000 |
| H | 2.492944000  | -1.200903000 | -1.531797000 |
| C | 2.735340000  | -3.615924000 | 0.836490000  |
| H | 1.676846000  | -3.612832000 | 2.711356000  |
| H | 3.241322000  | -4.557524000 | 1.039208000  |
| C | -1.432874000 | 1.297484000  | 0.042553000  |
| C | -0.658078000 | 2.572075000  | 0.393162000  |
| C | -2.864302000 | 1.385234000  | -0.133280000 |
| C | -1.480774000 | 3.830748000  | 0.257991000  |
| H | -0.372825000 | 2.499855000  | 1.465749000  |
| C | -3.543643000 | 2.563261000  | -0.125057000 |
| H | -3.407203000 | 0.465122000  | -0.323163000 |
| C | -2.807608000 | 3.812010000  | 0.057661000  |

|   |              |              |              |
|---|--------------|--------------|--------------|
| H | -0.973273000 | 4.778613000  | 0.411959000  |
| H | -3.366279000 | 4.745637000  | 0.020055000  |
| C | 1.436741000  | 1.295001000  | -0.043641000 |
| C | 0.664150000  | 2.570391000  | -0.396240000 |
| C | 2.868253000  | 1.380572000  | 0.132774000  |
| C | 1.488966000  | 3.827855000  | -0.262780000 |
| H | 0.378789000  | 2.497130000  | -1.468714000 |
| C | 3.549554000  | 2.557457000  | 0.123097000  |
| H | 3.409523000  | 0.459836000  | 0.324198000  |
| C | 2.815684000  | 3.807151000  | -0.061887000 |
| H | 0.983161000  | 4.776362000  | -0.418397000 |
| H | 3.375908000  | 4.739896000  | -0.025497000 |
| C | 3.901587000  | -3.534092000 | -1.411293000 |
| H | 4.757006000  | -4.039263000 | -0.948788000 |
| H | 3.383341000  | -4.278752000 | -2.030406000 |
| H | 4.288542000  | -2.762986000 | -2.085689000 |
| C | -5.032377000 | 2.634063000  | -0.331947000 |
| H | -5.465237000 | 1.641774000  | -0.490896000 |
| H | -5.534628000 | 3.087893000  | 0.534079000  |
| H | -5.284412000 | 3.258563000  | -1.200519000 |
| C | 5.038306000  | 2.626067000  | 0.330622000  |
| H | 5.541750000  | 3.077632000  | -0.535901000 |
| H | 5.290970000  | 3.251588000  | 1.198275000  |
| H | 5.469397000  | 1.633315000  | 0.491439000  |
| H | -1.661375000 | -3.627645000 | -2.693831000 |
| C | -3.944054000 | -3.501715000 | 1.395197000  |
| H | -4.985751000 | -3.316032000 | 1.100652000  |
| H | -3.829751000 | -4.586283000 | 1.504430000  |
| H | -3.797046000 | -3.046317000 | 2.379959000  |

TPE-4oM

S<sub>0</sub>

|   |              |              |              |
|---|--------------|--------------|--------------|
| C | 0.000000000  | -0.472102000 | -0.000016000 |
| C | -0.000015000 | 0.896969000  | -0.000036000 |
| C | 1.281589000  | -1.266794000 | -0.086494000 |
| C | 1.611442000  | -2.224133000 | 0.912931000  |
| C | 2.154269000  | -1.113124000 | -1.197481000 |
| C | 2.777713000  | -2.984565000 | 0.786467000  |
| C | 3.307547000  | -1.905339000 | -1.285585000 |
| C | 3.626693000  | -2.835962000 | -0.306471000 |
| H | 4.526219000  | -3.440152000 | -0.391436000 |
| C | 1.242053000  | 1.706180000  | 0.202042000  |
| C | 2.159130000  | 1.402105000  | 1.222941000  |
| C | 1.496978000  | 2.838645000  | -0.594243000 |
| C | 3.294677000  | 2.184802000  | 1.427222000  |
| H | 1.976034000  | 0.548060000  | 1.866137000  |

|   |              |              |              |
|---|--------------|--------------|--------------|
| C | 2.636556000  | 3.616778000  | -0.397319000 |
| H | 0.794405000  | 3.104385000  | -1.378544000 |
| C | 3.542204000  | 3.292755000  | 0.615023000  |
| H | 3.984649000  | 1.929804000  | 2.227367000  |
| H | 4.427728000  | 3.902376000  | 0.774061000  |
| C | -1.281561000 | -1.266842000 | 0.086492000  |
| C | -2.154256000 | -1.113170000 | 1.197474000  |
| C | -1.611368000 | -2.224213000 | -0.912903000 |
| C | -3.307510000 | -1.905410000 | 1.285590000  |
| C | -2.777630000 | -2.984673000 | -0.786431000 |
| C | -3.626624000 | -2.836065000 | 0.306492000  |
| H | -3.959606000 | -1.781628000 | 2.147414000  |
| H | -4.526136000 | -3.440275000 | 0.391467000  |
| C | -1.242101000 | 1.706165000  | -0.202084000 |
| C | -2.159252000 | 1.402033000  | -1.222899000 |
| C | -1.496962000 | 2.838679000  | 0.594151000  |
| C | -3.294807000 | 2.184726000  | -1.427147000 |
| H | -1.976211000 | 0.547948000  | -1.866057000 |
| C | -2.636548000 | 3.616809000  | 0.397260000  |
| H | -0.794333000 | 3.104460000  | 1.378387000  |
| C | -3.542270000 | 3.292729000  | -0.614997000 |
| H | -3.984836000 | 1.929686000  | -2.227229000 |
| H | -4.427800000 | 3.902347000  | -0.774010000 |
| H | 3.959632000  | -1.781561000 | -2.147417000 |
| H | -3.022182000 | -3.702283000 | -1.565995000 |
| H | 3.022292000  | -3.702149000 | 1.566047000  |
| H | 2.814751000  | 4.479753000  | -1.033773000 |
| H | -2.814694000 | 4.479824000  | 1.033674000  |
| C | 1.925103000  | -0.136539000 | -2.331565000 |
| H | 2.521033000  | 0.772839000  | -2.189970000 |
| H | 2.232107000  | -0.583521000 | -3.283823000 |
| H | 0.884823000  | 0.178217000  | -2.420348000 |
| C | 0.773947000  | -2.439219000 | 2.155161000  |
| H | -0.181275000 | -2.925691000 | 1.933388000  |
| H | 1.313152000  | -3.071037000 | 2.867952000  |
| H | 0.540194000  | -1.497061000 | 2.661277000  |
| C | -1.925149000 | -0.136525000 | 2.331510000  |
| H | -2.521018000 | 0.772875000  | 2.189780000  |
| H | -2.232294000 | -0.583424000 | 3.283769000  |
| H | -0.884865000 | 0.178217000  | 2.420381000  |
| C | -0.773844000 | -2.439341000 | -2.155103000 |
| H | -0.540009000 | -1.497156000 | -2.661148000 |
| H | 0.181312000  | -2.925945000 | -1.933322000 |
| H | -1.313091000 | -3.071070000 | -2.867941000 |

S<sub>0</sub>-final (C4C5)

|   |              |              |              |
|---|--------------|--------------|--------------|
| C | -0.042710000 | -0.520952000 | 0.017658000  |
| C | -0.017897000 | 0.953401000  | -0.102826000 |
| C | -1.217477000 | -1.198841000 | 0.183263000  |

|   |              |              |              |
|---|--------------|--------------|--------------|
| C | -1.329509000 | -2.665889000 | 0.387355000  |
| C | -2.537656000 | -0.404204000 | 0.306888000  |
| C | -2.526220000 | -3.267348000 | 0.179029000  |
| C | -3.721616000 | -1.206605000 | -0.205806000 |
| C | -3.708837000 | -2.542214000 | -0.241843000 |
| H | -4.577885000 | -3.102848000 | -0.569712000 |
| C | -1.163219000 | 1.652862000  | -0.331478000 |
| C | -2.466346000 | 0.902479000  | -0.522972000 |
| C | -1.177424000 | 3.096449000  | -0.533027000 |
| C | -3.680814000 | 1.787695000  | -0.343071000 |
| H | -2.476912000 | 0.568645000  | -1.584159000 |
| C | -2.330600000 | 3.793218000  | -0.589118000 |
| H | -0.227061000 | 3.608118000  | -0.613233000 |
| C | -3.611517000 | 3.123910000  | -0.413486000 |
| H | -4.643166000 | 1.308705000  | -0.205310000 |
| H | -4.508543000 | 3.728240000  | -0.330236000 |
| C | 1.287106000  | -1.205674000 | -0.118140000 |
| C | 1.656681000  | -1.715382000 | -1.380542000 |
| C | 2.171456000  | -1.312018000 | 0.970371000  |
| C | 2.905440000  | -2.321414000 | -1.533879000 |
| C | 3.411563000  | -1.930413000 | 0.783115000  |
| C | 3.782336000  | -2.429522000 | -0.458844000 |
| H | 3.187403000  | -2.713338000 | -2.505690000 |
| H | 4.748208000  | -2.905117000 | -0.589536000 |
| C | 1.282204000  | 1.688751000  | 0.015764000  |
| C | 1.530692000  | 2.485693000  | 1.141730000  |
| C | 2.250524000  | 1.648117000  | -0.995161000 |
| C | 2.715793000  | 3.209450000  | 1.261588000  |
| H | 0.781641000  | 2.536605000  | 1.924748000  |
| C | 3.435802000  | 2.369729000  | -0.877437000 |
| H | 2.075134000  | 1.046733000  | -1.878832000 |
| C | 3.674361000  | 3.150573000  | 0.252317000  |
| H | 2.887843000  | 3.819469000  | 2.141641000  |
| H | 4.597968000  | 3.711309000  | 0.343076000  |
| H | -4.610775000 | -0.661464000 | -0.500262000 |
| H | 4.087339000  | -2.021131000 | 1.627515000  |
| H | -2.608385000 | -4.339887000 | 0.322413000  |
| H | -2.315661000 | 4.867988000  | -0.731534000 |
| H | 4.173375000  | 2.322957000  | -1.670930000 |
| C | -2.760908000 | -0.103229000 | 1.816570000  |
| H | -1.944247000 | 0.511995000  | 2.206085000  |
| H | -3.701997000 | 0.428911000  | 1.978968000  |
| H | -2.793147000 | -1.041212000 | 2.376641000  |
| C | -0.184177000 | -3.536647000 | 0.853544000  |
| H | -0.570038000 | -4.524490000 | 1.119979000  |
| H | 0.588278000  | -3.673796000 | 0.094334000  |
| H | 0.307758000  | -3.120543000 | 1.735790000  |
| C | 0.718590000  | -1.632972000 | -2.561025000 |
| H | 0.366517000  | -0.610067000 | -2.731030000 |
| H | 1.214595000  | -1.976972000 | -3.472151000 |



|   |              |              |              |
|---|--------------|--------------|--------------|
| H | -0.172816000 | -2.250251000 | -2.408194000 |
| C | 1.813788000  | -0.794377000 | 2.341986000  |
| H | 2.164021000  | 0.234248000  | 2.476407000  |
| H | 0.734065000  | -0.794389000 | 2.508253000  |
| H | 2.280042000  | -1.406181000 | 3.119837000  |

S<sub>0</sub>-final (C8C9)

|   |              |              |              |
|---|--------------|--------------|--------------|
| C | -0.045905000 | -0.521347000 | 0.023877000  |
| C | -0.005848000 | 0.947690000  | -0.089041000 |
| C | 1.282521000  | -1.220316000 | -0.108161000 |
| C | 2.162152000  | -1.343421000 | 0.987409000  |
| C | 1.657405000  | -1.723653000 | -1.376217000 |
| C | 3.401778000  | -1.968104000 | 0.799757000  |
| C | 2.906554000  | -2.335161000 | -1.526091000 |
| C | 3.778998000  | -2.457677000 | -0.446128000 |
| H | 4.745269000  | -2.938403000 | -0.575938000 |
| C | 1.303034000  | 1.677075000  | 0.018606000  |
| C | 1.574453000  | 2.456593000  | 1.155276000  |
| C | 2.255689000  | 1.658511000  | -1.011916000 |
| C | 2.762786000  | 3.181067000  | 1.266809000  |
| H | 0.839798000  | 2.494319000  | 1.955266000  |
| C | 3.443292000  | 2.382111000  | -0.903739000 |
| H | 2.064585000  | 1.075850000  | -1.907231000 |
| C | 3.703627000  | 3.143534000  | 0.237183000  |
| H | 2.949664000  | 3.776073000  | 2.157191000  |
| H | 4.629783000  | 3.706118000  | 0.320457000  |
| C | -1.235377000 | -1.198198000 | 0.175624000  |
| C | -2.550600000 | -0.387414000 | 0.305377000  |
| C | -1.362338000 | -2.659577000 | 0.362253000  |
| C | -3.743158000 | -1.169040000 | -0.222894000 |
| C | -2.574888000 | -3.245590000 | 0.151238000  |
| C | -3.747914000 | -2.508180000 | -0.263309000 |
| H | -4.628820000 | -0.613261000 | -0.514782000 |
| H | -4.626946000 | -3.056546000 | -0.594033000 |
| C | -1.149590000 | 1.670502000  | -0.312563000 |
| C | -2.465002000 | 0.934270000  | -0.502346000 |
| C | -1.145819000 | 3.106100000  | -0.517043000 |
| C | -3.670733000 | 1.835839000  | -0.322160000 |
| H | -2.481584000 | 0.617375000  | -1.570601000 |
| C | -2.295768000 | 3.821608000  | -0.584067000 |
| H | -0.190195000 | 3.613171000  | -0.588441000 |
| C | -3.583528000 | 3.173779000  | -0.407939000 |
| H | -4.642866000 | 1.373177000  | -0.183094000 |
| H | -4.476585000 | 3.789682000  | -0.333196000 |
| H | 3.193688000  | -2.722148000 | -2.501140000 |
| H | -2.665532000 | -4.322046000 | 0.276873000  |
| H | 4.073655000  | -2.072387000 | 1.648866000  |
| H | 4.165672000  | 2.352202000  | -1.715343000 |
| H | -2.260341000 | 4.898219000  | -0.727749000 |

|   |              |              |              |
|---|--------------|--------------|--------------|
| C | 0.727855000  | -1.634146000 | -2.567866000 |
| H | 0.379343000  | -0.609388000 | -2.742195000 |
| H | 1.231038000  | -1.979050000 | -3.476797000 |
| H | -0.169202000 | -2.248465000 | -2.426608000 |
| C | 1.804063000  | -0.839252000 | 2.368019000  |
| H | 0.723381000  | -0.835148000 | 2.536059000  |
| H | 2.268020000  | -1.462814000 | 3.140239000  |
| H | 2.160234000  | 0.186966000  | 2.518045000  |
| C | -2.780985000 | -0.114398000 | 1.824687000  |
| H | -1.961365000 | 0.484936000  | 2.235900000  |
| H | -3.718706000 | 0.424034000  | 1.996123000  |
| H | -2.826100000 | -1.063382000 | 2.366802000  |
| C | -0.231556000 | -3.567390000 | 0.804904000  |
| H | 0.539422000  | -3.704320000 | 0.042039000  |
| H | 0.271625000  | -3.185008000 | 1.697847000  |
| H | -0.638125000 | -4.554643000 | 1.048205000  |

## OM2/MRCI: LIIC path

TPE-4mM

S<sub>0</sub>-S<sub>1</sub>S<sub>0</sub>-cyc(C4C5)\_S<sub>0</sub>-final(C4C5)

Coord\_1

|   |              |              |              |
|---|--------------|--------------|--------------|
| C | 0.000000000  | 0.000000000  | 0.000000000  |
| C | 1.357180000  | 0.000000000  | 0.000000000  |
| C | -0.799570000 | 0.000000000  | -1.247810000 |
| C | -1.883800000 | -0.860940000 | -1.373810000 |
| C | -0.475230000 | 0.896680000  | -2.274830000 |
| C | -2.650610000 | -0.846140000 | -2.550830000 |
| H | -2.145660000 | -1.544010000 | -0.559690000 |
| C | -1.246900000 | 0.905130000  | -3.442410000 |
| H | 0.384810000  | 1.562700000  | -2.178590000 |
| C | -2.321480000 | 0.046030000  | -3.580670000 |
| H | -2.924180000 | 0.061090000  | -4.498640000 |
| C | 2.155780000  | -0.132230000 | -1.231860000 |
| C | 1.885010000  | -1.155580000 | -2.149720000 |
| C | 3.233470000  | 0.752640000  | -1.452740000 |
| C | 2.659530000  | -1.268420000 | -3.278340000 |
| H | 1.052660000  | -1.838990000 | -1.969230000 |
| C | 3.994110000  | 0.637180000  | -2.591190000 |
| H | 3.455360000  | 1.520270000  | -0.703410000 |
| C | 3.712780000  | -0.372350000 | -3.517670000 |
| H | 2.453210000  | -2.059170000 | -4.011900000 |
| H | 4.314140000  | -0.465840000 | -4.428960000 |
| C | -0.801240000 | 0.010890000  | 1.240310000  |
| C | -0.515750000 | -0.893380000 | 2.272650000  |
| C | -1.882950000 | 0.909200000  | 1.361310000  |

|   |              |              |              |
|---|--------------|--------------|--------------|
| C | -1.295120000 | -0.886200000 | 3.427630000  |
| H | 0.326860000  | -1.582080000 | 2.178080000  |
| C | -2.654300000 | 0.913610000  | 2.529300000  |
| H | -2.117080000 | 1.592540000  | 0.538950000  |
| C | -2.362080000 | 0.014900000  | 3.563750000  |
| H | -1.074400000 | -1.590440000 | 4.239150000  |
| H | -2.968200000 | 0.009910000  | 4.475800000  |
| C | 2.149940000  | 0.144810000  | 1.244230000  |
| C | 1.876350000  | 1.203730000  | 2.119880000  |
| C | 3.171500000  | -0.760860000 | 1.529530000  |
| C | 2.632740000  | 1.344810000  | 3.286460000  |
| H | 1.066440000  | 1.903700000  | 1.898930000  |
| C | 3.921480000  | -0.615170000 | 2.707450000  |
| H | 3.389600000  | -1.582220000 | 0.838860000  |
| C | 3.646460000  | 0.444190000  | 3.582480000  |
| H | 2.423310000  | 2.178660000  | 3.968100000  |
| H | 4.236290000  | 0.559180000  | 4.498820000  |
| C | 5.154310000  | 1.563520000  | -2.836390000 |
| H | 6.087070000  | 1.043120000  | -2.577270000 |
| H | 5.182260000  | 1.864650000  | -3.894260000 |
| H | 5.062710000  | 2.468180000  | -2.215690000 |
| C | -3.813090000 | 1.850250000  | 2.659520000  |
| H | -4.728440000 | 1.337530000  | 2.324520000  |
| H | -3.937550000 | 2.161500000  | 3.708290000  |
| H | -3.656940000 | 2.746450000  | 2.040060000  |
| C | 5.031930000  | -1.567530000 | 3.013260000  |
| H | 5.969450000  | -1.170720000 | 2.592380000  |
| H | 5.150500000  | -1.684760000 | 4.101850000  |
| H | 4.830480000  | -2.553910000 | 2.568690000  |
| H | -0.991050000 | 1.600170000  | -4.251570000 |
| C | -3.833050000 | -1.748200000 | -2.688200000 |
| H | -4.737000000 | -1.217110000 | -2.344910000 |
| H | -3.970710000 | -2.044100000 | -3.740610000 |
| H | -3.701480000 | -2.654790000 | -2.076910000 |

## Coord\_2

|   |              |              |              |
|---|--------------|--------------|--------------|
| C | 0.000000000  | 0.000000000  | 0.000000000  |
| C | 1.363980000  | 0.000000000  | 0.000000000  |
| C | -0.783720000 | 0.000000000  | -1.248780000 |
| C | -1.948340000 | -0.760560000 | -1.336950000 |
| C | -0.358110000 | 0.785020000  | -2.339210000 |
| C | -2.669500000 | -0.785870000 | -2.539300000 |
| H | -2.299270000 | -1.334920000 | -0.475850000 |
| C | -1.107800000 | 0.761690000  | -3.523620000 |
| H | 0.500450000  | 1.450030000  | -2.223710000 |
| C | -2.237650000 | -0.025980000 | -3.632890000 |
| H | -2.805470000 | -0.055300000 | -4.570120000 |
| C | 2.148960000  | -0.200640000 | -1.220070000 |
| C | 1.801770000  | -1.232420000 | -2.112120000 |

|   |              |              |              |
|---|--------------|--------------|--------------|
| C | 3.275070000  | 0.614660000  | -1.476280000 |
| C | 2.559890000  | -1.414560000 | -3.252010000 |
| H | 0.964490000  | -1.899190000 | -1.861450000 |
| C | 4.015750000  | 0.425180000  | -2.616580000 |
| H | 3.544410000  | 1.392270000  | -0.752080000 |
| C | 3.661740000  | -0.593370000 | -3.513910000 |
| H | 2.299170000  | -2.208530000 | -3.962320000 |
| H | 4.255510000  | -0.749640000 | -4.423410000 |
| C | -0.792720000 | 0.055060000  | 1.244350000  |
| C | -0.556230000 | -0.872700000 | 2.268610000  |
| C | -1.813780000 | 1.018510000  | 1.383800000  |
| C | -1.322580000 | -0.825660000 | 3.431330000  |
| H | 0.240290000  | -1.612770000 | 2.160210000  |
| C | -2.574020000 | 1.061750000  | 2.558150000  |
| H | -2.011520000 | 1.723890000  | 0.569820000  |
| C | -2.329500000 | 0.138830000  | 3.583640000  |
| H | -1.138490000 | -1.547790000 | 4.236380000  |
| H | -2.926220000 | 0.165870000  | 4.501670000  |
| C | 2.156620000  | 0.214780000  | 1.234760000  |
| C | 1.894980000  | 1.328650000  | 2.043290000  |
| C | 3.166160000  | -0.685820000 | 1.577120000  |
| C | 2.652810000  | 1.532390000  | 3.198870000  |
| H | 1.095800000  | 2.025100000  | 1.776330000  |
| C | 3.916030000  | -0.478100000 | 2.744920000  |
| H | 3.371750000  | -1.551580000 | 0.938990000  |
| C | 3.654570000  | 0.637260000  | 3.552320000  |
| H | 2.454300000  | 2.409120000  | 3.827750000  |
| H | 4.244090000  | 0.800460000  | 4.461510000  |
| C | 5.227330000  | 1.269080000  | -2.899300000 |
| H | 6.105120000  | 0.808740000  | -2.423060000 |
| H | 5.395210000  | 1.341160000  | -3.985140000 |
| H | 5.091990000  | 2.285210000  | -2.496130000 |
| C | -3.671400000 | 2.067600000  | 2.705730000  |
| H | -4.618250000 | 1.617970000  | 2.367830000  |
| H | -3.772760000 | 2.372040000  | 3.758950000  |
| H | -3.461080000 | 2.960500000  | 2.097530000  |
| C | 5.009330000  | -1.428350000 | 3.113640000  |
| H | 5.933310000  | -1.134730000 | 2.590960000  |
| H | 5.190790000  | -1.405100000 | 4.199590000  |
| H | 4.742490000  | -2.454460000 | 2.818760000  |
| H | -0.782690000 | 1.377010000  | -4.373360000 |
| C | -3.919730000 | -1.596720000 | -2.646290000 |
| H | -4.788880000 | -0.950820000 | -2.439450000 |
| H | -4.017690000 | -2.013980000 | -3.660730000 |
| H | -3.910300000 | -2.423150000 | -1.919150000 |

Coord\_3

|   |             |             |             |
|---|-------------|-------------|-------------|
| C | 0.000000000 | 0.000000000 | 0.000000000 |
| C | 1.370770000 | 0.000000000 | 0.000000000 |

|   |              |              |              |
|---|--------------|--------------|--------------|
| C | -0.767920000 | 0.000000000  | -1.249550000 |
| C | -2.003590000 | -0.649800000 | -1.307670000 |
| C | -0.252710000 | 0.659130000  | -2.393730000 |
| C | -2.686880000 | -0.723880000 | -2.526990000 |
| H | -2.430530000 | -1.102740000 | -0.411170000 |
| C | -0.986670000 | 0.600980000  | -3.589510000 |
| H | 0.600500000  | 1.330450000  | -2.274190000 |
| C | -2.167130000 | -0.110160000 | -3.671870000 |
| H | -2.707710000 | -0.189210000 | -4.619890000 |
| C | 2.142220000  | -0.268110000 | -1.204360000 |
| C | 1.720450000  | -1.302400000 | -2.071050000 |
| C | 3.313420000  | 0.473450000  | -1.490960000 |
| C | 2.461480000  | -1.553270000 | -3.218320000 |
| H | 0.881480000  | -1.951070000 | -1.754880000 |
| C | 4.033150000  | 0.211070000  | -2.628810000 |
| H | 3.628900000  | 1.257590000  | -0.791700000 |
| C | 3.608370000  | -0.810970000 | -3.497320000 |
| H | 2.148360000  | -2.346310000 | -3.906000000 |
| H | 4.193320000  | -1.030020000 | -4.401420000 |
| C | -0.784170000 | 0.099530000  | 1.246740000  |
| C | -0.600910000 | -0.848320000 | 2.263930000  |
| C | -1.740400000 | 1.124360000  | 1.401970000  |
| C | -1.354500000 | -0.761810000 | 3.432690000  |
| H | 0.146170000  | -1.636960000 | 2.143760000  |
| C | -2.489940000 | 1.206280000  | 2.581010000  |
| H | -1.897970000 | 1.849230000  | 0.595650000  |
| C | -2.297450000 | 0.262420000  | 3.598520000  |
| H | -1.210310000 | -1.499370000 | 4.232030000  |
| H | -2.884870000 | 0.321220000  | 4.521230000  |
| C | 2.163300000  | 0.284140000  | 1.221350000  |
| C | 1.913690000  | 1.448560000  | 1.959370000  |
| C | 3.160610000  | -0.607620000 | 1.621150000  |
| C | 2.672900000  | 1.714130000  | 3.100650000  |
| H | 1.125420000  | 2.138300000  | 1.646090000  |
| C | 3.910280000  | -0.338540000 | 2.775660000  |
| H | 3.353620000  | -1.514200000 | 1.038360000  |
| C | 3.662500000  | 0.828330000  | 3.511890000  |
| H | 2.485360000  | 2.630230000  | 3.674110000  |
| H | 4.251620000  | 1.039330000  | 4.411450000  |
| C | 5.291640000  | 0.968080000  | -2.943340000 |
| H | 6.098770000  | 0.620050000  | -2.281610000 |
| H | 5.583510000  | 0.801970000  | -3.992860000 |
| H | 5.141330000  | 2.048610000  | -2.786690000 |
| C | -3.521530000 | 2.277710000  | 2.743110000  |
| H | -4.495110000 | 1.893330000  | 2.400800000  |
| H | -3.603050000 | 2.574530000  | 3.800190000  |
| H | -3.255240000 | 3.163260000  | 2.146100000  |
| C | 4.986080000  | -1.282190000 | 3.208060000  |
| H | 5.888210000  | -1.106560000 | 2.601380000  |
| H | 5.233950000  | -1.124910000 | 4.269450000  |

|   |              |              |              |
|---|--------------|--------------|--------------|
| H | 4.658110000  | -2.323340000 | 3.068850000  |
| H | -0.600490000 | 1.128400000  | -4.473920000 |
| C | -3.997700000 | -1.437010000 | -2.607390000 |
| H | -4.813840000 | -0.699660000 | -2.544290000 |
| H | -4.076020000 | -1.976730000 | -3.563460000 |
| H | -4.102030000 | -2.155680000 | -1.780730000 |

Coord\_4

|   |              |              |              |
|---|--------------|--------------|--------------|
| C | 0.000000000  | 0.000000000  | 0.000000000  |
| C | 1.377570000  | 0.000000000  | 0.000000000  |
| C | -0.752180000 | 0.000000000  | -1.250150000 |
| C | -2.048390000 | -0.530070000 | -1.286270000 |
| C | -0.160790000 | 0.521050000  | -2.437790000 |
| C | -2.703090000 | -0.659310000 | -2.513700000 |
| H | -2.536570000 | -0.851530000 | -0.366430000 |
| C | -0.885870000 | 0.426640000  | -3.639430000 |
| H | 0.685420000  | 1.203380000  | -2.330610000 |
| C | -2.111970000 | -0.202970000 | -3.697010000 |
| H | -2.633830000 | -0.335040000 | -4.647270000 |
| C | 2.135550000  | -0.334420000 | -1.184810000 |
| C | 1.641510000  | -1.365420000 | -2.027290000 |
| C | 3.348340000  | 0.329730000  | -1.496390000 |
| C | 2.364950000  | -1.684160000 | -3.178130000 |
| H | 0.803530000  | -1.995330000 | -1.650650000 |
| C | 4.046290000  | -0.004120000 | -2.627670000 |
| H | 3.708480000  | 1.117070000  | -0.821500000 |
| C | 3.553000000  | -1.024240000 | -3.468310000 |
| H | 2.001730000  | -2.472290000 | -3.844260000 |
| H | 4.127890000  | -1.305760000 | -4.363400000 |
| C | -0.775590000 | 0.144220000  | 1.247490000  |
| C | -0.649510000 | -0.819980000 | 2.258400000  |
| C | -1.663220000 | 1.226350000  | 1.415980000  |
| C | -1.390660000 | -0.694420000 | 3.431550000  |
| H | 0.045090000  | -1.654120000 | 2.128400000  |
| C | -2.402530000 | 1.346760000  | 2.598070000  |
| H | -1.777070000 | 1.967850000  | 0.616730000  |
| C | -2.266110000 | 0.385560000  | 3.608410000  |
| H | -1.289450000 | -1.444700000 | 4.225790000  |
| H | -2.844410000 | 0.475810000  | 4.534520000  |
| C | 2.169990000  | 0.352670000  | 1.204050000  |
| C | 1.932470000  | 1.563030000  | 1.868460000  |
| C | 3.154860000  | -0.526400000 | 1.661420000  |
| C | 2.693010000  | 1.889430000  | 2.992180000  |
| H | 1.155280000  | 2.242810000  | 1.508770000  |
| C | 3.904210000  | -0.196780000 | 2.799470000  |
| H | 3.335200000  | -1.470070000 | 1.136490000  |
| C | 3.670230000  | 1.016870000  | 3.461330000  |
| H | 2.516510000  | 2.841250000  | 3.507820000  |
| H | 4.258870000  | 1.275140000  | 4.348780000  |

|   |              |              |              |
|---|--------------|--------------|--------------|
| C | 5.347010000  | 0.662210000  | -2.967780000 |
| H | 6.075820000  | 0.471540000  | -2.165170000 |
| H | 5.741720000  | 0.265320000  | -3.917960000 |
| H | 5.207520000  | 1.751090000  | -3.071930000 |
| C | -3.364350000 | 2.479790000  | 2.772030000  |
| H | -4.359620000 | 2.162430000  | 2.423610000  |
| H | -3.429370000 | 2.768410000  | 3.832490000  |
| H | -3.040670000 | 3.353800000  | 2.186380000  |
| C | 4.962200000  | -1.129260000 | 3.296010000  |
| H | 5.834170000  | -1.083080000 | 2.625290000  |
| H | 5.279220000  | -0.847860000 | 4.312370000  |
| H | 4.578180000  | -2.160290000 | 3.314490000  |
| H | -0.447710000 | 0.859260000  | -4.552370000 |
| C | -4.066900000 | -1.268630000 | -2.571260000 |
| H | -4.815740000 | -0.465960000 | -2.655390000 |
| H | -4.146260000 | -1.926250000 | -3.449580000 |
| H | -4.272060000 | -1.855340000 | -1.663880000 |

#### Coord\_5

|   |              |              |              |
|---|--------------|--------------|--------------|
| C | 0.000000000  | 0.000000000  | 0.000000000  |
| C | 1.384370000  | 0.000000000  | 0.000000000  |
| C | -0.736500000 | 0.000000000  | -1.250550000 |
| C | -2.081710000 | -0.402900000 | -1.272940000 |
| C | -0.083930000 | 0.373050000  | -2.471030000 |
| C | -2.718260000 | -0.591200000 | -2.499340000 |
| H | -2.614950000 | -0.585670000 | -0.342020000 |
| C | -0.807290000 | 0.242580000  | -3.673100000 |
| H | 0.755280000  | 1.068010000  | -2.392990000 |
| C | -2.073690000 | -0.300630000 | -3.708110000 |
| H | -2.585970000 | -0.486840000 | -4.652160000 |
| C | 2.128950000  | -0.399350000 | -1.161510000 |
| C | 1.565410000  | -1.421490000 | -1.981590000 |
| C | 3.379670000  | 0.184300000  | -1.492260000 |
| C | 2.270980000  | -1.806990000 | -3.132320000 |
| H | 0.730490000  | -2.032740000 | -1.549770000 |
| C | 4.055140000  | -0.219300000 | -2.612990000 |
| H | 3.782790000  | 0.971610000  | -0.840800000 |
| C | 3.495980000  | -1.232330000 | -3.427360000 |
| H | 1.860240000  | -2.586470000 | -3.778430000 |
| H | 4.059560000  | -1.575700000 | -4.309850000 |
| C | -0.766970000 | 0.189090000  | 1.246570000  |
| C | -0.701710000 | -0.787460000 | 2.251800000  |
| C | -1.582680000 | 1.324080000  | 1.426070000  |
| C | -1.430850000 | -0.623300000 | 3.427690000  |
| H | -0.062300000 | -1.663750000 | 2.113710000  |
| C | -2.312270000 | 1.482800000  | 2.609560000  |
| H | -1.649500000 | 2.079100000  | 0.633440000  |
| C | -2.235650000 | 0.508150000  | 3.613310000  |
| H | -1.375450000 | -1.383360000 | 4.217290000  |

|   |              |              |              |
|---|--------------|--------------|--------------|
| H | -2.805070000 | 0.629540000  | 4.541540000  |
| C | 2.176670000  | 0.420160000  | 1.182910000  |
| C | 1.951330000  | 1.671650000  | 1.770920000  |
| C | 3.148910000  | -0.442340000 | 1.697690000  |
| C | 2.713130000  | 2.057710000  | 2.873910000  |
| H | 1.185390000  | 2.338210000  | 1.364950000  |
| C | 3.897830000  | -0.053170000 | 2.816190000  |
| H | 3.316510000  | -1.419210000 | 1.232920000  |
| C | 3.677780000  | 1.202360000  | 3.400780000  |
| H | 2.547730000  | 3.041460000  | 3.329560000  |
| H | 4.265860000  | 1.507230000  | 4.273690000  |
| C | 5.393260000  | 0.353220000  | -2.972070000 |
| H | 6.043810000  | 0.353800000  | -2.083420000 |
| H | 5.866600000  | -0.250590000 | -3.765420000 |
| H | 5.285550000  | 1.389530000  | -3.335040000 |
| C | -3.200730000 | 2.673100000  | 2.792930000  |
| H | -4.212450000 | 2.424130000  | 2.436530000  |
| H | -3.252720000 | 2.953210000  | 3.856370000  |
| H | -2.818690000 | 3.531300000  | 2.219080000  |
| C | 4.937690000  | -0.969810000 | 3.376990000  |
| H | 5.771320000  | -1.060930000 | 2.663770000  |
| H | 5.325770000  | -0.577330000 | 4.329860000  |
| H | 4.503520000  | -1.965730000 | 3.551210000  |
| H | -0.327020000 | 0.574890000  | -4.608320000 |
| C | -4.126980000 | -1.091020000 | -2.537840000 |
| H | -4.798690000 | -0.250810000 | -2.768830000 |
| H | -4.227670000 | -1.856470000 | -3.320700000 |
| H | -4.416060000 | -1.525850000 | -1.570400000 |

### Coord\_6

|   |              |              |              |
|---|--------------|--------------|--------------|
| C | 0.000000000  | 0.000000000  | 0.000000000  |
| C | 1.391160000  | 0.000000000  | 0.000000000  |
| C | -0.720870000 | 0.000000000  | -1.250780000 |
| C | -2.102640000 | -0.269920000 | -1.267740000 |
| C | -0.023470000 | 0.217580000  | -2.493280000 |
| C | -2.732270000 | -0.518530000 | -2.484010000 |
| H | -2.663730000 | -0.309800000 | -0.337920000 |
| C | -0.752340000 | 0.052940000  | -3.690580000 |
| H | 0.809680000  | 0.923510000  | -2.460750000 |
| C | -2.053300000 | -0.399180000 | -3.705360000 |
| H | -2.565400000 | -0.638440000 | -4.635100000 |
| C | 2.122430000  | -0.462670000 | -1.134540000 |
| C | 1.492600000  | -1.470710000 | -1.934680000 |
| C | 3.407280000  | 0.037960000  | -1.478340000 |
| C | 2.180230000  | -1.921620000 | -3.081770000 |
| H | 0.662160000  | -2.064120000 | -1.453140000 |
| C | 4.059700000  | -0.433410000 | -2.584740000 |
| H | 3.851520000  | 0.822210000  | -0.849010000 |
| C | 3.437690000  | -1.434440000 | -3.375020000 |



|   |              |              |              |
|---|--------------|--------------|--------------|
| H | 1.724800000  | -2.688990000 | -3.709810000 |
| H | 3.988710000  | -1.838760000 | -4.241390000 |
| C | -0.758320000 | 0.234060000  | 1.243970000  |
| C | -0.757140000 | -0.750560000 | 2.243860000  |
| C | -1.499210000 | 1.417230000  | 1.432470000  |
| C | -1.474790000 | -0.548270000 | 3.420870000  |
| H | -0.175320000 | -1.665440000 | 2.099240000  |
| C | -2.219660000 | 1.614070000  | 2.615720000  |
| H | -1.515990000 | 2.182400000  | 0.646230000  |
| C | -2.206220000 | 0.630130000  | 3.613240000  |
| H | -1.467790000 | -1.314970000 | 4.206100000  |
| H | -2.767090000 | 0.782310000  | 4.542320000  |
| C | 2.183350000  | 0.486380000  | 1.157980000  |
| C | 1.970260000  | 1.774050000  | 1.667120000  |
| C | 3.142760000  | -0.355630000 | 1.729770000  |
| C | 2.733260000  | 2.218440000  | 2.746280000  |
| H | 1.215730000  | 2.424100000  | 1.215280000  |
| C | 3.891150000  | 0.091970000  | 2.825680000  |
| H | 3.297540000  | -1.361660000 | 1.327160000  |
| C | 3.685130000  | 1.384270000  | 3.330420000  |
| H | 2.579010000  | 3.230180000  | 3.140040000  |
| H | 4.272580000  | 1.734980000  | 4.186380000  |
| C | 5.430250000  | 0.042940000  | -2.955860000 |
| H | 6.009380000  | 0.254380000  | -2.042590000 |
| H | 5.957230000  | -0.728900000 | -3.544470000 |
| H | 5.369130000  | 0.965490000  | -3.558990000 |
| C | -3.031610000 | 2.857010000  | 2.806340000  |
| H | -4.054340000 | 2.677350000  | 2.439940000  |
| H | -3.074080000 | 3.128530000  | 3.872400000  |
| H | -2.590670000 | 3.695060000  | 2.244980000  |
| C | 4.912550000  | -0.804120000 | 3.450490000  |
| H | 5.699900000  | -1.036570000 | 2.717300000  |
| H | 5.372760000  | -0.316320000 | 4.323870000  |
| H | 4.434870000  | -1.740790000 | 3.774630000  |
| H | -0.240500000 | 0.280870000  | -4.641840000 |
| C | -4.177350000 | -0.903590000 | -2.507220000 |
| H | -4.766790000 | -0.054030000 | -2.880940000 |
| H | -4.318260000 | -1.761650000 | -3.179150000 |
| H | -4.530070000 | -1.171650000 | -1.501610000 |

### Coord\_7

|   |              |              |              |
|---|--------------|--------------|--------------|
| C | 0.000000000  | 0.000000000  | 0.000000000  |
| C | 1.397960000  | 0.000000000  | 0.000000000  |
| C | -0.705310000 | 0.000000000  | -1.250820000 |
| C | -2.110450000 | -0.132860000 | -1.270620000 |
| C | 0.019540000  | 0.057230000  | -2.504580000 |
| C | -2.744760000 | -0.440280000 | -2.467910000 |
| H | -2.681510000 | -0.028710000 | -0.353760000 |
| C | -0.721910000 | -0.138050000 | -3.692280000 |

|   |              |              |              |
|---|--------------|--------------|--------------|
| H | 0.847750000  | 0.769280000  | -2.532740000 |
| C | -2.051220000 | -0.494590000 | -3.689280000 |
| H | -2.572480000 | -0.783660000 | -4.597140000 |
| C | 2.115990000  | -0.524170000 | -1.104020000 |
| C | 1.423520000  | -1.513270000 | -1.887260000 |
| C | 3.431030000  | -0.108440000 | -1.454460000 |
| C | 2.093370000  | -2.028040000 | -3.027330000 |
| H | 0.598350000  | -2.090280000 | -1.361550000 |
| C | 4.060010000  | -0.645360000 | -2.542990000 |
| H | 3.914360000  | 0.669940000  | -0.845630000 |
| C | 3.378480000  | -1.629870000 | -3.311900000 |
| H | 1.596360000  | -2.780190000 | -3.639620000 |
| H | 3.915740000  | -2.093910000 | -4.158720000 |
| C | -0.749640000 | 0.279070000  | 1.239690000  |
| C | -0.815460000 | -0.709130000 | 2.234300000  |
| C | -1.413300000 | 1.505490000  | 1.435470000  |
| C | -1.522200000 | -0.469160000 | 3.410820000  |
| H | -0.293260000 | -1.658840000 | 2.084490000  |
| C | -2.125220000 | 1.740270000  | 2.616840000  |
| H | -1.377340000 | 2.277250000  | 0.655580000  |
| C | -2.177990000 | 0.751420000  | 3.608210000  |
| H | -1.565910000 | -1.239190000 | 4.191740000  |
| H | -2.730670000 | 0.934050000  | 4.536890000  |
| C | 2.190030000  | 0.551120000  | 1.129350000  |
| C | 1.989250000  | 1.869870000  | 1.557480000  |
| C | 3.136410000  | -0.266480000 | 1.757460000  |
| C | 2.753390000  | 2.371100000  | 2.609790000  |
| H | 1.246310000  | 2.500110000  | 1.060370000  |
| C | 3.884160000  | 0.238270000  | 2.827780000  |
| H | 3.278310000  | -1.297530000 | 1.418730000  |
| C | 3.692290000  | 1.562100000  | 3.250470000  |
| H | 2.610350000  | 3.406810000  | 2.940010000  |
| H | 4.279030000  | 1.957750000  | 4.087110000  |
| C | 5.457910000  | -0.266770000 | -2.918950000 |
| H | 5.977790000  | 0.158880000  | -2.044920000 |
| H | 6.014960000  | -1.155410000 | -3.267960000 |
| H | 5.451240000  | 0.485310000  | -3.727800000 |
| C | -2.857940000 | 3.030960000  | 2.812820000  |
| H | -3.886080000 | 2.921080000  | 2.434320000  |
| H | -2.894460000 | 3.294100000  | 3.881170000  |
| H | -2.358000000 | 3.844540000  | 2.264940000  |
| C | 4.886800000  | -0.632540000 | 3.516000000  |
| H | 5.620260000  | -1.006430000 | 2.785690000  |
| H | 5.419270000  | -0.067430000 | 4.296780000  |
| H | 4.372900000  | -1.487260000 | 3.980590000  |
| H | -0.189500000 | -0.017040000 | -4.653460000 |
| C | -4.217070000 | -0.705810000 | -2.479650000 |
| H | -4.723950000 | 0.125700000  | -2.988460000 |
| H | -4.414770000 | -1.636750000 | -3.027930000 |
| H | -4.610610000 | -0.797780000 | -1.458330000 |

## Coord\_8

|   |             |             |             |
|---|-------------|-------------|-------------|
| C | 0.00000000  | 0.00000000  | 0.00000000  |
| C | 1.40476000  | 0.00000000  | 0.00000000  |
| C | -0.68981000 | 0.00000000  | -1.25068000 |
| C | -2.10456000 | 0.00650000  | -1.28138000 |
| C | 0.04434000  | -0.10529000 | -2.50517000 |
| C | -2.75512000 | -0.35553000 | -2.45140000 |
| H | -2.66747000 | 0.25270000  | -0.38878000 |
| C | -0.71635000 | -0.32609000 | -3.67896000 |
| H | 0.86816000  | 0.60523000  | -2.60733000 |
| C | -2.06727000 | -0.58287000 | -3.66076000 |
| H | -2.60664000 | -0.91650000 | -4.53988000 |
| C | 2.10963000  | -0.58365000 | -1.07007000 |
| C | 1.35860000  | -1.54947000 | -1.84001000 |
| C | 3.45082000  | -0.25404000 | -1.42054000 |
| C | 2.01107000  | -2.12636000 | -2.96982000 |
| H | 0.53889000  | -2.11205000 | -1.27568000 |
| C | 4.05612000  | -0.85408000 | -2.48787000 |
| H | 3.97103000  | 0.51591000  | -0.83028000 |
| C | 3.31877000  | -1.81798000 | -3.23865000 |
| H | 1.47580000  | -2.86059000 | -3.56901000 |
| H | 3.84107000  | -2.34025000 | -4.06261000 |
| C | -0.74093000 | 0.32405000  | 1.23371000  |
| C | -0.87626000 | -0.66305000 | 2.22280000  |
| C | -1.32541000 | 1.58861000  | 1.43537000  |
| C | -1.57276000 | -0.38585000 | 3.39723000  |
| H | -0.41535000 | -1.64366000 | 2.06889000  |
| C | -2.02947000 | 1.86116000  | 2.61323000  |
| H | -1.23434000 | 2.36320000  | 0.66204000  |
| C | -2.15107000 | 0.87199000  | 3.59822000  |
| H | -1.66920000 | -1.15575000 | 4.17369000  |
| H | -2.69600000 | 1.08472000  | 4.52527000  |
| C | 2.19671000  | 0.61419000  | 1.09710000  |
| C | 2.00832000  | 1.95878000  | 1.44242000  |
| C | 3.12987000  | -0.17510000 | 1.78056000  |
| C | 2.77353000  | 2.51522000  | 2.46495000  |
| H | 1.27711000  | 2.56595000  | 0.90091000  |
| C | 3.87687000  | 0.38538000  | 2.82239000  |
| H | 3.25882000  | -1.22692000 | 1.50716000  |
| C | 3.69926000  | 1.73537000  | 3.16116000  |
| H | 2.64175000  | 3.57076000  | 2.73027000  |
| H | 4.28520000  | 2.17493000  | 3.97614000  |
| C | 5.47622000  | -0.57406000 | -2.86135000 |
| H | 5.95250000  | 0.05221000  | -2.08833000 |
| H | 6.04312000  | -1.51966000 | -2.95143000 |
| H | 5.52486000  | -0.04013000 | -3.82766000 |
| C | -2.68072000 | 3.19452000  | 2.81300000  |
| H | -3.70855000 | 3.15440000  | 2.42025000  |

|   |              |              |              |
|---|--------------|--------------|--------------|
| H | -2.714850000 | 3.449730000  | 3.883330000  |
| H | -2.122140000 | 3.979320000  | 2.279870000  |
| C | 4.860440000  | -0.455410000 | 3.573060000  |
| H | 5.532840000  | -0.966990000 | 2.868170000  |
| H | 5.464390000  | 0.167250000  | 4.251270000  |
| H | 4.318220000  | -1.207530000 | 4.165250000  |
| H | -0.174720000 | -0.312990000 | -4.644130000 |
| C | -4.244920000 | -0.497290000 | -2.455530000 |
| H | -4.673620000 | 0.290730000  | -3.088640000 |
| H | -4.512780000 | -1.477650000 | -2.870500000 |
| H | -4.654850000 | -0.409700000 | -1.440830000 |

### Coord\_9

|   |              |              |              |
|---|--------------|--------------|--------------|
| C | 0.000000000  | 0.000000000  | 0.000000000  |
| C | 1.411560000  | 0.000000000  | 0.000000000  |
| C | -0.674370000 | 0.000000000  | -1.250350000 |
| C | -2.084600000 | 0.146360000  | -1.299740000 |
| C | 0.050480000  | -0.267230000 | -2.495480000 |
| C | -2.762470000 | -0.263460000 | -2.434910000 |
| H | -2.621380000 | 0.529580000  | -0.441920000 |
| C | -0.735440000 | -0.506960000 | -3.651650000 |
| H | 0.869230000  | 0.431940000  | -2.682520000 |
| C | -2.100690000 | -0.660170000 | -3.620970000 |
| H | -2.666420000 | -1.031220000 | -4.465330000 |
| C | 2.103340000  | -0.640910000 | -1.032830000 |
| C | 1.298250000  | -1.579650000 | -1.793520000 |
| C | 3.466570000  | -0.397960000 | -1.376600000 |
| C | 1.933960000  | -2.216830000 | -2.910030000 |
| H | 0.483620000  | -2.130250000 | -1.196120000 |
| C | 4.048090000  | -1.058520000 | -2.419640000 |
| H | 4.021290000  | 0.361310000  | -0.802690000 |
| C | 3.258940000  | -1.998220000 | -3.155970000 |
| H | 1.363990000  | -2.930840000 | -3.499020000 |
| H | 3.765130000  | -2.576950000 | -3.953910000 |
| C | -0.732190000 | 0.368940000  | 1.226040000  |
| C | -0.939130000 | -0.612250000 | 2.209040000  |
| C | -1.236060000 | 1.666400000  | 1.432510000  |
| C | -1.626120000 | -0.298270000 | 3.379800000  |
| H | -0.540810000 | -1.619720000 | 2.051860000  |
| C | -1.932940000 | 1.976560000  | 2.605220000  |
| H | -1.087860000 | 2.439930000  | 0.666220000  |
| C | -2.125590000 | 0.991800000  | 3.583290000  |
| H | -1.777010000 | -1.064470000 | 4.151390000  |
| H | -2.663250000 | 1.234270000  | 4.507450000  |
| C | 2.203390000  | 0.675370000  | 1.061320000  |
| C | 2.027440000  | 2.040470000  | 1.322380000  |
| C | 3.123130000  | -0.081720000 | 1.798900000  |
| C | 2.793670000  | 2.650350000  | 2.312310000  |
| H | 1.308140000  | 2.621350000  | 0.737580000  |

|   |              |              |              |
|---|--------------|--------------|--------------|
| C | 3.869280000  | 0.532910000  | 2.809390000  |
| H | 3.239070000  | -1.150010000 | 1.591970000  |
| C | 3.706030000  | 1.903580000  | 3.062740000  |
| H | 2.673200000  | 3.721530000  | 2.511630000  |
| H | 4.291110000  | 2.385920000  | 3.853790000  |
| C | 5.485180000  | -0.877060000 | -2.783240000 |
| H | 5.934970000  | -0.080040000 | -2.166560000 |
| H | 6.046680000  | -1.815650000 | -2.612050000 |
| H | 5.583520000  | -0.596130000 | -3.848100000 |
| C | -2.500930000 | 3.347330000  | 2.807540000  |
| H | -3.522660000 | 3.376480000  | 2.398370000  |
| H | -2.536230000 | 3.595350000  | 3.879500000  |
| H | -1.884550000 | 4.099150000  | 2.290730000  |
| C | 4.833480000  | -0.273160000 | 3.621180000  |
| H | 5.438200000  | -0.914900000 | 2.963320000  |
| H | 5.507190000  | 0.386140000  | 4.190230000  |
| H | 4.271330000  | -0.904550000 | 4.325170000  |
| H | -0.196090000 | -0.601200000 | -4.615200000 |
| C | -4.259360000 | -0.277850000 | -2.435390000 |
| H | -4.618620000 | 0.444280000  | -3.179310000 |
| H | -4.606910000 | -1.281430000 | -2.710690000 |
| H | -4.660620000 | -0.013230000 | -1.448860000 |

### Coord\_10

|   |              |              |              |
|---|--------------|--------------|--------------|
| C | 0.000000000  | 0.000000000  | 0.000000000  |
| C | 1.418350000  | 0.000000000  | 0.000000000  |
| C | -0.659010000 | 0.000000000  | -1.249850000 |
| C | -2.050360000 | 0.284880000  | -1.325290000 |
| C | 0.037830000  | -0.425800000 | -2.476130000 |
| C | -2.765720000 | -0.163440000 | -2.419000000 |
| H | -2.543590000 | 0.797160000  | -0.511790000 |
| C | -0.778400000 | -0.676580000 | -3.611650000 |
| H | 0.849110000  | 0.250830000  | -2.756060000 |
| C | -2.150120000 | -0.722910000 | -3.571340000 |
| H | -2.749480000 | -1.122600000 | -4.375870000 |
| C | 2.097130000  | -0.695770000 | -0.992450000 |
| C | 1.242860000  | -1.604280000 | -1.748340000 |
| C | 3.478210000  | -0.539320000 | -1.322720000 |
| C | 1.862670000  | -2.299760000 | -2.848630000 |
| H | 0.432430000  | -2.145670000 | -1.123320000 |
| C | 4.036040000  | -1.257640000 | -2.338640000 |
| H | 4.064910000  | 0.207330000  | -0.762740000 |
| C | 3.199400000  | -2.170120000 | -3.064570000 |
| H | 1.261770000  | -2.991750000 | -3.430560000 |
| H | 3.688390000  | -2.803280000 | -3.833510000 |
| C | -0.723410000 | 0.413670000  | 1.216680000  |
| C | -1.003650000 | -0.556690000 | 2.192670000  |
| C | -1.145740000 | 1.738730000  | 1.427240000  |
| C | -1.681900000 | -0.206360000 | 3.358180000  |

|   |              |              |              |
|---|--------------|--------------|--------------|
| H | -0.668820000 | -1.586900000 | 2.032780000  |
| C | -1.836150000 | 2.086340000  | 2.593130000  |
| H | -0.938760000 | 2.507180000  | 0.668730000  |
| C | -2.101640000 | 1.110830000  | 3.563400000  |
| H | -1.888640000 | -0.965220000 | 4.124230000  |
| H | -2.632560000 | 1.382690000  | 4.483450000  |
| C | 2.210070000  | 0.734470000  | 1.022140000  |
| C | 2.046640000  | 2.114690000  | 1.197820000  |
| C | 3.116200000  | 0.013410000  | 1.812300000  |
| C | 2.813810000  | 2.776080000  | 2.152430000  |
| H | 1.339390000  | 2.666090000  | 0.571060000  |
| C | 3.861390000  | 0.680490000  | 2.788710000  |
| H | 3.219080000  | -1.066980000 | 1.672710000  |
| C | 3.712610000  | 2.066270000  | 2.955500000  |
| H | 2.704690000  | 3.858640000  | 2.284930000  |
| H | 4.296740000  | 2.590140000  | 3.720390000  |
| C | 5.484880000  | -1.173950000 | -2.685000000 |
| H | 5.924620000  | -0.250300000 | -2.269550000 |
| H | 6.031640000  | -2.042280000 | -2.267280000 |
| H | 5.621910000  | -1.165150000 | -3.782710000 |
| C | -2.319600000 | 3.489160000  | 2.797140000  |
| H | -3.329390000 | 3.586570000  | 2.369420000  |
| H | -2.359560000 | 3.730970000  | 3.870330000  |
| H | -1.646690000 | 4.203950000  | 2.298500000  |
| C | 4.805930000  | -0.086230000 | 3.659930000  |
| H | 5.336980000  | -0.847070000 | 3.069180000  |
| H | 5.546730000  | 0.588210000  | 4.116720000  |
| H | 4.232640000  | -0.581770000 | 4.457380000  |
| H | -0.252810000 | -0.876030000 | -4.568390000 |
| C | -4.258610000 | -0.047640000 | -2.419810000 |
| H | -4.560930000 | 0.590180000  | -3.258930000 |
| H | -4.690960000 | -1.046610000 | -2.552500000 |
| H | -4.626490000 | 0.385650000  | -1.481660000 |

### Coord\_11

|   |              |              |              |
|---|--------------|--------------|--------------|
| C | 0.000000000  | 0.000000000  | 0.000000000  |
| C | 1.424050000  | 0.000000000  | 0.000000000  |
| C | -0.667930000 | 0.000000000  | -1.235150000 |
| C | -2.075830000 | 0.220030000  | -1.291760000 |
| C | 0.055700000  | -0.310630000 | -2.488370000 |
| C | -2.777190000 | -0.180010000 | -2.407470000 |
| H | -2.586560000 | 0.651180000  | -0.438420000 |
| C | -0.777150000 | -0.617200000 | -3.619820000 |
| H | 0.752200000  | 0.500900000  | -2.762430000 |
| C | -2.141190000 | -0.675630000 | -3.558660000 |
| H | -2.748180000 | -1.061230000 | -4.369590000 |
| C | 2.107070000  | -0.595260000 | -1.048430000 |
| C | 1.274750000  | -1.408910000 | -1.943720000 |
| C | 3.509040000  | -0.443880000 | -1.292930000 |

|   |              |              |              |
|---|--------------|--------------|--------------|
| C | 1.941610000  | -1.894460000 | -3.141520000 |
| H | 0.585440000  | -2.142940000 | -1.378970000 |
| C | 4.089520000  | -1.009340000 | -2.389170000 |
| H | 4.093680000  | 0.176030000  | -0.595770000 |
| C | 3.282400000  | -1.748220000 | -3.288410000 |
| H | 1.353620000  | -2.449460000 | -3.870600000 |
| H | 3.795130000  | -2.213680000 | -4.151950000 |
| C | -0.718510000 | 0.325550000  | 1.247440000  |
| C | -0.988260000 | -0.705460000 | 2.161140000  |
| C | -1.140530000 | 1.634150000  | 1.539760000  |
| C | -1.662840000 | -0.429900000 | 3.348600000  |
| H | -0.654180000 | -1.723140000 | 1.934940000  |
| C | -1.824360000 | 1.906420000  | 2.729000000  |
| H | -0.935430000 | 2.446710000  | 0.829620000  |
| C | -2.082850000 | 0.871230000  | 3.637560000  |
| H | -1.867070000 | -1.236100000 | 4.065000000  |
| H | -2.608990000 | 1.083960000  | 4.575630000  |
| C | 2.195740000  | 0.635310000  | 1.098830000  |
| C | 2.111990000  | 2.016100000  | 1.320550000  |
| C | 3.001330000  | -0.171930000 | 1.914350000  |
| C | 2.855510000  | 2.589710000  | 2.348250000  |
| H | 1.483470000  | 2.636070000  | 0.674350000  |
| C | 3.726250000  | 0.408290000  | 2.959130000  |
| H | 3.044260000  | -1.251200000 | 1.738090000  |
| C | 3.654900000  | 1.793110000  | 3.173980000  |
| H | 2.808280000  | 3.671740000  | 2.517760000  |
| H | 4.221420000  | 2.248670000  | 3.993990000  |
| C | 5.553520000  | -0.918310000 | -2.661780000 |
| H | 6.014400000  | -0.139450000 | -2.030510000 |
| H | 6.043150000  | -1.886150000 | -2.442080000 |
| H | 5.732490000  | -0.663980000 | -3.722600000 |
| C | -2.305240000 | 3.293250000  | 3.026490000  |
| H | -3.340240000 | 3.399480000  | 2.667010000  |
| H | -2.279240000 | 3.484110000  | 4.110100000  |
| H | -1.670580000 | 4.037390000  | 2.520840000  |
| C | 4.563820000  | -0.448560000 | 3.855800000  |
| H | 5.023210000  | -1.267310000 | 3.282340000  |
| H | 5.362190000  | 0.147010000  | 4.324700000  |
| H | 3.923040000  | -0.873330000 | 4.642540000  |
| H | -0.261410000 | -0.827940000 | -4.576860000 |
| C | -4.271050000 | -0.099310000 | -2.423090000 |
| H | -4.581660000 | 0.571960000  | -3.234360000 |
| H | -4.681790000 | -1.100580000 | -2.607940000 |
| H | -4.659040000 | 0.280600000  | -1.469000000 |

Coord\_12

|   |              |             |              |
|---|--------------|-------------|--------------|
| C | 0.000000000  | 0.000000000 | 0.000000000  |
| C | 1.432590000  | 0.000000000 | 0.000000000  |
| C | -0.680880000 | 0.000000000 | -1.213020000 |

|   |              |              |              |
|---|--------------|--------------|--------------|
| C | -2.107360000 | 0.121140000  | -1.244000000 |
| C | 0.063610000  | -0.129570000 | -2.497490000 |
| C | -2.797820000 | -0.201560000 | -2.383150000 |
| H | -2.632380000 | 0.423480000  | -0.338990000 |
| C | -0.777150000 | -0.526180000 | -3.628260000 |
| H | 0.551250000  | 0.848380000  | -2.745870000 |
| C | -2.129780000 | -0.604780000 | -3.552880000 |
| H | -2.738410000 | -0.971360000 | -4.379080000 |
| C | 2.121870000  | -0.436700000 | -1.113400000 |
| C | 1.327520000  | -1.073530000 | -2.192680000 |
| C | 3.547090000  | -0.326540000 | -1.239090000 |
| C | 2.062980000  | -1.219120000 | -3.461030000 |
| H | 0.849760000  | -2.048750000 | -1.815720000 |
| C | 4.170870000  | -0.648960000 | -2.407070000 |
| H | 4.114590000  | 0.064760000  | -0.383400000 |
| C | 3.405640000  | -1.075120000 | -3.514080000 |
| H | 1.497800000  | -1.518370000 | -4.347860000 |
| H | 3.954030000  | -1.263940000 | -4.452090000 |
| C | -0.711120000 | 0.189210000  | 1.281490000  |
| C | -0.965090000 | -0.925170000 | 2.094570000  |
| C | -1.132980000 | 1.463610000  | 1.694020000  |
| C | -1.634400000 | -0.764410000 | 3.305780000  |
| H | -0.631890000 | -1.916030000 | 1.770870000  |
| C | -1.807050000 | 1.619950000  | 2.908970000  |
| H | -0.930760000 | 2.336670000  | 1.061220000  |
| C | -2.055110000 | 0.502580000  | 3.717940000  |
| H | -1.834850000 | -1.635560000 | 3.942190000  |
| H | -2.574250000 | 0.624360000  | 4.675750000  |
| C | 2.173980000  | 0.471610000  | 1.194890000  |
| C | 2.223940000  | 1.838430000  | 1.498750000  |
| C | 2.816110000  | -0.463990000 | 2.018590000  |
| C | 2.932880000  | 2.266980000  | 2.618070000  |
| H | 1.723280000  | 2.560390000  | 0.846900000  |
| C | 3.512800000  | -0.027800000 | 3.149160000  |
| H | 2.758120000  | -1.530370000 | 1.777990000  |
| C | 3.571190000  | 1.341220000  | 3.448230000  |
| H | 2.989350000  | 3.336540000  | 2.852890000  |
| H | 4.112690000  | 1.683870000  | 4.337360000  |
| C | 5.651780000  | -0.576410000 | -2.572050000 |
| H | 6.116400000  | -0.097460000 | -1.694610000 |
| H | 6.067350000  | -1.594100000 | -2.682860000 |
| H | 5.905360000  | 0.010330000  | -3.472510000 |
| C | -2.284250000 | 2.971090000  | 3.344150000  |
| H | -3.349500000 | 3.076080000  | 3.088380000  |
| H | -2.160520000 | 3.086590000  | 4.431330000  |
| H | -1.713200000 | 3.763660000  | 2.836510000  |
| C | 4.177430000  | -1.018880000 | 4.052920000  |
| H | 4.494100000  | -1.905670000 | 3.483630000  |
| H | 5.061380000  | -0.570810000 | 4.531780000  |
| H | 3.462600000  | -1.326020000 | 4.830380000  |



|   |              |              |              |
|---|--------------|--------------|--------------|
| H | -0.263850000 | -0.755010000 | -4.578530000 |
| C | -4.291330000 | -0.167830000 | -2.414730000 |
| H | -4.619350000 | 0.552620000  | -3.178200000 |
| H | -4.672810000 | -1.165670000 | -2.676760000 |
| H | -4.700590000 | 0.129290000  | -1.438840000 |

Coord\_13

|   |              |              |              |
|---|--------------|--------------|--------------|
| C | 0.000000000  | 0.000000000  | 0.000000000  |
| C | 1.443980000  | 0.000000000  | 0.000000000  |
| C | -0.697310000 | 0.000000000  | -1.183350000 |
| C | -2.136990000 | -0.012700000 | -1.185730000 |
| C | 0.037850000  | 0.121400000  | -2.489610000 |
| C | -2.831680000 | -0.227430000 | -2.337110000 |
| H | -2.657960000 | 0.108130000  | -0.229120000 |
| C | -0.778920000 | -0.399380000 | -3.632680000 |
| H | 0.196830000  | 1.237510000  | -2.677310000 |
| C | -2.117290000 | -0.507880000 | -3.571800000 |
| H | -2.707810000 | -0.848070000 | -4.432080000 |
| C | 2.141450000  | -0.216050000 | -1.163180000 |
| C | 1.406930000  | -0.563510000 | -2.428860000 |
| C | 3.581530000  | -0.215880000 | -1.165280000 |
| C | 2.226610000  | -0.248840000 | -3.643460000 |
| H | 1.254970000  | -1.696230000 | -2.420530000 |
| C | 4.278210000  | -0.214050000 | -2.335860000 |
| H | 4.101030000  | -0.174340000 | -0.201180000 |
| C | 3.566090000  | -0.143060000 | -3.601510000 |
| H | 1.693600000  | -0.156370000 | -4.600740000 |
| H | 4.158270000  | 0.044080000  | -4.506280000 |
| C | -0.701200000 | 0.002180000  | 1.303540000  |
| C | -0.934010000 | -1.207890000 | 1.970430000  |
| C | -1.123380000 | 1.213770000  | 1.870160000  |
| C | -1.596820000 | -1.203430000 | 3.195710000  |
| H | -0.601570000 | -2.148500000 | 1.521840000  |
| C | -1.784700000 | 1.211830000  | 3.101430000  |
| H | -0.925160000 | 2.156100000  | 1.348430000  |
| C | -2.019010000 | -0.000150000 | 3.765840000  |
| H | -1.792180000 | -2.148870000 | 3.716310000  |
| H | -2.529180000 | -0.002490000 | 4.735910000  |
| C | 2.144510000  | 0.231120000  | 1.283260000  |
| C | 2.393070000  | 1.541190000  | 1.713770000  |
| C | 2.551780000  | -0.859000000 | 2.065920000  |
| C | 3.058510000  | 1.756510000  | 2.918540000  |
| H | 2.075970000  | 2.385830000  | 1.095260000  |
| C | 3.214960000  | -0.636180000 | 3.276080000  |
| H | 2.343220000  | -1.879430000 | 1.727480000  |
| C | 3.466030000  | 0.675070000  | 3.703200000  |
| H | 3.268860000  | 2.779690000  | 3.252970000  |
| H | 3.977200000  | 0.851360000  | 4.656700000  |
| C | 5.769300000  | -0.218580000 | -2.377490000 |

|   |              |              |              |
|---|--------------|--------------|--------------|
| H | 6.189370000  | -0.229630000 | -1.359900000 |
| H | 6.118950000  | -1.112850000 | -2.919100000 |
| H | 6.130500000  | 0.680300000  | -2.904170000 |
| C | -2.257320000 | 2.494160000  | 3.713360000  |
| H | -3.348310000 | 2.570370000  | 3.593390000  |
| H | -2.007080000 | 2.515450000  | 4.784150000  |
| H | -1.781640000 | 3.355970000  | 3.220750000  |
| C | 3.632670000  | -1.789070000 | 4.135400000  |
| H | 3.704570000  | -2.710420000 | 3.537550000  |
| H | 4.611480000  | -1.587850000 | 4.596020000  |
| H | 2.882020000  | -1.932070000 | 4.926300000  |
| H | -0.244980000 | -0.649380000 | -4.560730000 |
| C | -4.322680000 | -0.248000000 | -2.377330000 |
| H | -4.682590000 | 0.533710000  | -3.066330000 |
| H | -4.672260000 | -1.229350000 | -2.738660000 |
| H | -4.743800000 | -0.064600000 | -1.376780000 |

S<sub>0</sub>\_S<sub>1</sub>S<sub>0</sub>-cyc(C8C9)\_S<sub>0</sub>-final(C8C9)

Coord\_1

|   |              |              |              |
|---|--------------|--------------|--------------|
| C | 0.000000000  | 0.000000000  | 0.000000000  |
| C | 1.357180000  | 0.000000000  | 0.000000000  |
| C | -0.799570000 | 0.000000000  | -1.247810000 |
| C | -1.883800000 | -0.860940000 | -1.373810000 |
| C | -0.475230000 | 0.896680000  | -2.274830000 |
| C | -2.650610000 | -0.846140000 | -2.550830000 |
| H | -2.145660000 | -1.544010000 | -0.559690000 |
| C | -1.246900000 | 0.905130000  | -3.442410000 |
| H | 0.384810000  | 1.562700000  | -2.178590000 |
| C | -2.321480000 | 0.046030000  | -3.580670000 |
| H | -2.924180000 | 0.061090000  | -4.498640000 |
| C | 2.155780000  | -0.132230000 | -1.231860000 |
| C | 1.885010000  | -1.155580000 | -2.149720000 |
| C | 3.233470000  | 0.752640000  | -1.452740000 |
| C | 2.659530000  | -1.268420000 | -3.278340000 |
| H | 1.052660000  | -1.838990000 | -1.969230000 |
| C | 3.994110000  | 0.637180000  | -2.591190000 |
| H | 3.455360000  | 1.520270000  | -0.703410000 |
| C | 3.712780000  | -0.372350000 | -3.517670000 |
| H | 2.453210000  | -2.059170000 | -4.011900000 |
| H | 4.314140000  | -0.465840000 | -4.428960000 |
| C | -0.801240000 | 0.010890000  | 1.240310000  |
| C | -0.515750000 | -0.893380000 | 2.272650000  |
| C | -1.882950000 | 0.909200000  | 1.361310000  |
| C | -1.295120000 | -0.886200000 | 3.427630000  |
| H | 0.326860000  | -1.582080000 | 2.178080000  |
| C | -2.654300000 | 0.913610000  | 2.529300000  |

|   |              |              |              |
|---|--------------|--------------|--------------|
| H | -2.117080000 | 1.592540000  | 0.538950000  |
| C | -2.362080000 | 0.014900000  | 3.563750000  |
| H | -1.074400000 | -1.590440000 | 4.239150000  |
| H | -2.968200000 | 0.009910000  | 4.475800000  |
| C | 2.149940000  | 0.144810000  | 1.244230000  |
| C | 1.876350000  | 1.203730000  | 2.119880000  |
| C | 3.171500000  | -0.760860000 | 1.529530000  |
| C | 2.632740000  | 1.344810000  | 3.286460000  |
| H | 1.066440000  | 1.903700000  | 1.898930000  |
| C | 3.921480000  | -0.615170000 | 2.707450000  |
| H | 3.389600000  | -1.582220000 | 0.838860000  |
| C | 3.646460000  | 0.444190000  | 3.582480000  |
| H | 2.423310000  | 2.178660000  | 3.968100000  |
| H | 4.236290000  | 0.559180000  | 4.498820000  |
| C | 5.154310000  | 1.563520000  | -2.836390000 |
| H | 6.087070000  | 1.043120000  | -2.577270000 |
| H | 5.182260000  | 1.864650000  | -3.894260000 |
| H | 5.062710000  | 2.468180000  | -2.215690000 |
| C | -3.813090000 | 1.850250000  | 2.659520000  |
| H | -4.728440000 | 1.337530000  | 2.324520000  |
| H | -3.937550000 | 2.161500000  | 3.708290000  |
| H | -3.656940000 | 2.746450000  | 2.040060000  |
| C | 5.031930000  | -1.567530000 | 3.013260000  |
| H | 5.969450000  | -1.170720000 | 2.592380000  |
| H | 5.150500000  | -1.684760000 | 4.101850000  |
| H | 4.830480000  | -2.553910000 | 2.568690000  |
| H | -0.991050000 | 1.600170000  | -4.251570000 |
| C | -3.833050000 | -1.748200000 | -2.688200000 |
| H | -4.737000000 | -1.217110000 | -2.344910000 |
| H | -3.970710000 | -2.044100000 | -3.740610000 |
| H | -3.701480000 | -2.654790000 | -2.076910000 |

## Coord\_2

|   |              |              |              |
|---|--------------|--------------|--------------|
| C | 0.000000000  | 0.000000000  | 0.000000000  |
| C | 1.366130000  | 0.000000000  | 0.000000000  |
| C | -0.776300000 | 0.000000000  | -1.263430000 |
| C | -1.830630000 | -0.894700000 | -1.422930000 |
| C | -0.466640000 | 0.922530000  | -2.272560000 |
| C | -2.578010000 | -0.886220000 | -2.611510000 |
| H | -2.081250000 | -1.599080000 | -0.623310000 |
| C | -1.217220000 | 0.924220000  | -3.452990000 |
| H | 0.368030000  | 1.616900000  | -2.150840000 |
| C | -2.261630000 | 0.031430000  | -3.622840000 |
| H | -2.848070000 | 0.040330000  | -4.551130000 |
| C | 2.154630000  | -0.241310000 | -1.221540000 |
| C | 1.854980000  | -1.327800000 | -2.053960000 |
| C | 3.244810000  | 0.603220000  | -1.519090000 |
| C | 2.620120000  | -1.546960000 | -3.175910000 |
| H | 1.010810000  | -1.977060000 | -1.812540000 |

|   |              |              |              |
|---|--------------|--------------|--------------|
| C | 3.994940000  | 0.382140000  | -2.652130000 |
| H | 3.484640000  | 1.426370000  | -0.837470000 |
| C | 3.687610000  | -0.693820000 | -3.492000000 |
| H | 2.392480000  | -2.389370000 | -3.842070000 |
| H | 4.280630000  | -0.871600000 | -4.396410000 |
| C | -0.778680000 | 0.121310000  | 1.242180000  |
| C | -0.451500000 | -0.663230000 | 2.365760000  |
| C | -1.884270000 | 1.000590000  | 1.294470000  |
| C | -1.223030000 | -0.555140000 | 3.525190000  |
| H | 0.365560000  | -1.384800000 | 2.298590000  |
| C | -2.633920000 | 1.107560000  | 2.468590000  |
| H | -2.155330000 | 1.580540000  | 0.407860000  |
| C | -2.299800000 | 0.335210000  | 3.592140000  |
| H | -0.976130000 | -1.172250000 | 4.399020000  |
| H | -2.887280000 | 0.419230000  | 4.511140000  |
| C | 2.151620000  | 0.252030000  | 1.219520000  |
| C | 1.808920000  | 1.339420000  | 2.047020000  |
| C | 3.204100000  | -0.601880000 | 1.566310000  |
| C | 2.544970000  | 1.566640000  | 3.220230000  |
| H | 1.014340000  | 2.031050000  | 1.731780000  |
| C | 3.930330000  | -0.373450000 | 2.740670000  |
| H | 3.456190000  | -1.450410000 | 0.920220000  |
| C | 3.594010000  | 0.730960000  | 3.564000000  |
| H | 2.290430000  | 2.421760000  | 3.857020000  |
| H | 4.172510000  | 0.919890000  | 4.476740000  |
| C | 5.164880000  | 1.268150000  | -2.980270000 |
| H | 6.084480000  | 0.805240000  | -2.595190000 |
| H | 5.248890000  | 1.399690000  | -4.069540000 |
| H | 5.037650000  | 2.257690000  | -2.515090000 |
| C | -3.818070000 | 2.020030000  | 2.521770000  |
| H | -4.721650000 | 1.446800000  | 2.262880000  |
| H | -3.933960000 | 2.438120000  | 3.533320000  |
| H | -3.700950000 | 2.847680000  | 1.806490000  |
| C | 5.071030000  | -1.265890000 | 3.108900000  |
| H | 5.980310000  | -0.921730000 | 2.590240000  |
| H | 5.248030000  | -1.237510000 | 4.195930000  |
| H | 4.861600000  | -2.304800000 | 2.809490000  |
| H | -0.971450000 | 1.639060000  | -4.247960000 |
| C | -3.727080000 | -1.825350000 | -2.784610000 |
| H | -4.658200000 | -1.320500000 | -2.477140000 |
| H | -3.817160000 | -2.131220000 | -3.839120000 |
| H | -3.589520000 | -2.724080000 | 0.000000000  |

### Coord\_3

|   |              |              |              |
|---|--------------|--------------|--------------|
| C | 0.000000000  | 0.000000000  | 0.000000000  |
| C | 1.375080000  | 0.000000000  | 0.000000000  |
| C | -0.752720000 | 0.000000000  | -1.278610000 |
| C | -1.775110000 | -0.927400000 | -1.471190000 |
| C | -0.458990000 | 0.946990000  | -2.270340000 |

|   |              |              |              |
|---|--------------|--------------|--------------|
| C | -2.502480000 | -0.925490000 | -2.671230000 |
| H | -2.013470000 | -1.651960000 | -0.685720000 |
| C | -1.187860000 | 0.941830000  | -3.463460000 |
| H | 0.348620000  | 1.668750000  | -2.123500000 |
| C | -2.200120000 | 0.016360000  | -3.664470000 |
| H | -2.769730000 | 0.019010000  | -4.602980000 |
| C | 2.153420000  | -0.349570000 | -1.201450000 |
| C | 1.825050000  | -1.491550000 | -1.943980000 |
| C | 3.255830000  | 0.447800000  | -1.570600000 |
| C | 2.580490000  | -1.816630000 | -3.049290000 |
| H | 0.969390000  | -2.101050000 | -1.645940000 |
| C | 3.995200000  | 0.121310000  | -2.688410000 |
| H | 3.513560000  | 1.320300000  | -0.960890000 |
| C | 3.661940000  | -1.013260000 | -3.436780000 |
| H | 2.331610000  | -2.704620000 | -3.644320000 |
| H | 4.246450000  | -1.274770000 | -4.326500000 |
| C | -0.756070000 | 0.232070000  | 1.233790000  |
| C | -0.387180000 | -0.422940000 | 2.433790000  |
| C | -1.884770000 | 1.086850000  | 1.222970000  |
| C | -1.150660000 | -0.213800000 | 3.588940000  |
| H | 0.401020000  | -1.178030000 | 2.404370000  |
| C | -2.612480000 | 1.297570000  | 2.393780000  |
| H | -2.192210000 | 1.556840000  | 0.285790000  |
| C | -2.236840000 | 0.660930000  | 3.590230000  |
| H | -0.877470000 | -0.738280000 | 4.515120000  |
| H | -2.805930000 | 0.835190000  | 4.506780000  |
| C | 2.153330000  | 0.356040000  | 1.185620000  |
| C | 1.744480000  | 1.465190000  | 1.966030000  |
| C | 3.236000000  | -0.441170000 | 1.587370000  |
| C | 2.462000000  | 1.776690000  | 3.138610000  |
| H | 0.969720000  | 2.144940000  | 1.564510000  |
| C | 3.939890000  | -0.131400000 | 2.751340000  |
| H | 3.520800000  | -1.313120000 | 0.986260000  |
| C | 3.544560000  | 1.008930000  | 3.521090000  |
| H | 2.164940000  | 2.648100000  | 3.731610000  |
| H | 4.112650000  | 1.269990000  | 4.423980000  |
| C | 5.174640000  | 0.959500000  | -3.094510000 |
| H | 6.077230000  | 0.577490000  | -2.596640000 |
| H | 5.314400000  | 0.918820000  | -4.185380000 |
| H | 5.015750000  | 2.007650000  | -2.798550000 |
| C | -3.821170000 | 2.179050000  | 2.376770000  |
| H | -4.711240000 | 1.555860000  | 2.201900000  |
| H | -3.929110000 | 2.699340000  | 3.340260000  |
| H | -3.743370000 | 2.927280000  | 1.574590000  |
| C | 5.109830000  | -0.959120000 | 3.174490000  |
| H | 5.988310000  | -0.684300000 | 2.568120000  |
| H | 5.342190000  | -0.784890000 | 4.237660000  |
| H | 4.897380000  | -2.030540000 | 3.027950000  |
| H | -0.953120000 | 1.675440000  | -4.244580000 |
| C | -3.615970000 | -1.900470000 | -2.879580000 |

|   |              |              |              |
|---|--------------|--------------|--------------|
| H | -4.572200000 | -1.422540000 | -2.609490000 |
| H | -3.657380000 | -2.214780000 | -3.934460000 |
| H | -3.473870000 | -2.791160000 | -2.247680000 |

Coord\_4

|   |              |              |              |
|---|--------------|--------------|--------------|
| C | 0.000000000  | 0.000000000  | 0.000000000  |
| C | 1.384030000  | 0.000000000  | 0.000000000  |
| C | -0.728850000 | 0.000000000  | -1.293340000 |
| C | -1.717280000 | -0.958990000 | -1.518480000 |
| C | -0.452230000 | 0.970020000  | -2.268250000 |
| C | -2.424040000 | -0.963890000 | -2.729850000 |
| H | -1.942380000 | -1.702580000 | -0.746750000 |
| C | -1.158770000 | 0.957940000  | -3.473870000 |
| H | 0.326660000  | 1.718200000  | -2.096730000 |
| C | -2.136900000 | 0.000850000  | -3.705490000 |
| H | -2.689120000 | -0.002780000 | -4.654100000 |
| C | 2.152170000  | -0.456130000 | -1.171670000 |
| C | 1.795240000  | -1.645630000 | -1.820580000 |
| C | 3.266500000  | 0.287820000  | -1.606700000 |
| C | 2.540670000  | -2.075290000 | -2.899310000 |
| H | 0.928440000  | -2.210250000 | -1.470780000 |
| C | 3.994860000  | -0.142940000 | -2.699460000 |
| H | 3.542100000  | 1.203180000  | -1.072540000 |
| C | 3.635770000  | -1.327940000 | -3.352180000 |
| H | 2.270650000  | -3.002490000 | -3.420060000 |
| H | 4.211620000  | -1.671880000 | -4.219460000 |
| C | -0.733420000 | 0.342170000  | 1.215100000  |
| C | -0.322870000 | -0.175360000 | 2.475640000  |
| C | -1.884380000 | 1.167980000  | 1.147190000  |
| C | -1.078040000 | 0.134240000  | 3.617870000  |
| H | 0.433550000  | -0.962290000 | 2.494800000  |
| C | -2.589940000 | 1.482740000  | 2.305070000  |
| H | -2.227590000 | 1.523260000  | 0.173780000  |
| C | -2.173230000 | 0.989080000  | 3.557260000  |
| H | -0.778500000 | -0.293260000 | 4.585960000  |
| H | -2.724220000 | 1.253720000  | 4.461800000  |
| C | 2.155060000  | 0.456050000  | 1.142920000  |
| C | 1.683500000  | 1.580840000  | 1.878330000  |
| C | 3.267160000  | -0.280240000 | 1.592610000  |
| C | 2.384650000  | 1.974240000  | 3.043440000  |
| H | 0.932030000  | 2.246770000  | 1.398850000  |
| C | 3.950230000  | 0.108900000  | 2.739700000  |
| H | 3.583280000  | -1.172010000 | 1.036430000  |
| C | 3.498900000  | 1.276260000  | 3.455320000  |
| H | 2.047880000  | 2.857460000  | 3.594340000  |
| H | 4.057710000  | 1.607230000  | 4.342420000  |
| C | 5.183580000  | 0.640490000  | -3.177880000 |
| H | 6.065640000  | 0.360060000  | -2.584540000 |
| H | 5.378390000  | 0.430200000  | -4.240580000 |

|   |              |              |              |
|---|--------------|--------------|--------------|
| H | 4.997070000  | 1.718680000  | -3.060150000 |
| C | -3.822270000 | 2.327600000  | 2.225340000  |
| H | -4.697090000 | 1.665930000  | 2.140920000  |
| H | -3.922900000 | 2.944350000  | 3.130520000  |
| H | -3.784010000 | 2.986760000  | 1.346420000  |
| C | 5.148320000  | -0.650160000 | 3.209800000  |
| H | 5.994000000  | -0.459670000 | 2.528480000  |
| H | 5.432550000  | -0.333320000 | 4.226870000  |
| H | 4.937740000  | -1.732640000 | 3.220790000  |
| H | -0.935960000 | 1.709300000  | -4.241550000 |
| C | -3.499770000 | -1.973420000 | -2.972880000 |
| H | -4.478940000 | -1.523040000 | -2.741640000 |
| H | -3.491540000 | -2.294600000 | -4.026270000 |
| H | -3.354600000 | -2.855970000 | -2.330360000 |

### Coord\_5

|   |              |              |              |
|---|--------------|--------------|--------------|
| C | 0.000000000  | 0.000000000  | 0.000000000  |
| C | 1.392980000  | 0.000000000  | 0.000000000  |
| C | -0.704690000 | 0.000000000  | -1.307640000 |
| C | -1.657170000 | -0.989420000 | -1.564700000 |
| C | -0.446310000 | 0.991600000  | -2.266360000 |
| C | -2.342720000 | -1.001320000 | -2.787250000 |
| H | -1.868080000 | -1.750850000 | -0.806220000 |
| C | -1.129890000 | 0.972560000  | -3.484250000 |
| H | 0.302230000  | 1.765160000  | -2.070700000 |
| C | -2.071950000 | -0.015030000 | -3.745870000 |
| H | -2.606220000 | -0.024970000 | -4.704430000 |
| C | 2.150860000  | -0.560100000 | -1.132330000 |
| C | 1.765550000  | -1.788920000 | -1.684660000 |
| C | 3.276830000  | 0.124800000  | -1.626980000 |
| C | 2.500670000  | -2.320870000 | -2.726990000 |
| H | 0.887990000  | -2.304070000 | -1.288440000 |
| C | 3.993930000  | -0.408180000 | -2.684960000 |
| H | 3.570250000  | 1.076230000  | -1.171390000 |
| C | 3.609110000  | -1.635130000 | -3.238660000 |
| H | 2.209630000  | -3.280700000 | -3.170910000 |
| H | 4.176130000  | -2.059470000 | -4.075850000 |
| C | -0.710750000 | 0.450630000  | 1.186170000  |
| C | -0.258660000 | 0.076540000  | 2.490540000  |
| C | -1.883060000 | 1.243990000  | 1.067470000  |
| C | -1.005240000 | 0.485280000  | 3.611350000  |
| H | 0.463520000  | -0.738090000 | 2.569110000  |
| C | -2.566250000 | 1.662140000  | 2.202710000  |
| H | -2.261310000 | 1.481700000  | 0.072590000  |
| C | -2.109040000 | 1.316540000  | 3.492780000  |
| H | -0.679290000 | 0.157910000  | 4.610550000  |
| H | -2.642230000 | 1.670660000  | 4.375760000  |
| C | 2.156810000  | 0.551320000  | 1.091850000  |
| C | 1.626420000  | 1.686340000  | 1.785240000  |

|   |              |              |              |
|---|--------------|--------------|--------------|
| C | 3.297550000  | -0.120650000 | 1.582080000  |
| C | 2.313710000  | 2.158840000  | 2.936480000  |
| H | 0.900780000  | 2.338020000  | 1.236190000  |
| C | 3.961400000  | 0.345460000  | 2.706150000  |
| H | 3.643470000  | -1.028850000 | 1.070420000  |
| C | 3.457780000  | 1.531390000  | 3.368330000  |
| H | 1.940290000  | 3.049970000  | 3.447530000  |
| H | 4.008620000  | 1.929630000  | 4.234000000  |
| C | 5.191690000  | 0.314160000  | -3.229420000 |
| H | 6.050040000  | 0.152580000  | -2.561520000 |
| H | 5.440460000  | -0.057950000 | -4.235120000 |
| H | 4.981640000  | 1.392390000  | -3.293870000 |
| C | -3.821260000 | 2.466040000  | 2.068130000  |
| H | -4.679110000 | 1.778070000  | 2.079040000  |
| H | -3.915180000 | 3.172480000  | 2.905490000  |
| H | -3.822660000 | 3.027820000  | 1.123730000  |
| C | 5.186520000  | -0.341910000 | 3.214910000  |
| H | 5.997940000  | -0.248660000 | 2.473780000  |
| H | 5.518730000  | 0.110800000  | 4.164230000  |
| H | 4.982530000  | -1.413100000 | 3.384760000  |
| H | -0.919880000 | 1.740620000  | -4.238960000 |
| C | -3.378540000 | -2.044060000 | -3.064240000 |
| H | -4.378360000 | -1.621770000 | -2.873230000 |
| H | -3.319860000 | -2.370490000 | -4.114220000 |
| H | -3.231770000 | -2.918440000 | -2.411020000 |

### Coord\_6

|   |              |              |              |
|---|--------------|--------------|--------------|
| C | 0.000000000  | 0.000000000  | 0.000000000  |
| C | 1.401930000  | 0.000000000  | 0.000000000  |
| C | -0.680240000 | 0.000000000  | -1.321480000 |
| C | -1.594830000 | -1.018630000 | -1.609740000 |
| C | -0.441170000 | 1.011720000  | -2.264740000 |
| C | -2.258540000 | -1.037720000 | -2.843290000 |
| H | -1.790660000 | -1.796720000 | -0.863950000 |
| C | -1.101160000 | 0.985700000  | -3.494660000 |
| H | 0.275420000  | 1.809560000  | -2.045560000 |
| C | -2.005250000 | -0.031230000 | -3.785520000 |
| H | -2.520990000 | -0.047490000 | -4.753870000 |
| C | 2.149520000  | -0.660630000 | -1.083680000 |
| C | 1.736020000  | -1.920380000 | -1.537230000 |
| C | 3.286790000  | -0.039730000 | -1.631170000 |
| C | 2.460520000  | -2.551400000 | -2.533530000 |
| H | 0.848060000  | -2.382050000 | -1.100340000 |
| C | 3.992390000  | -0.671960000 | -2.644820000 |
| H | 3.597990000  | 0.940780000  | -1.256530000 |
| C | 3.581970000  | -1.932160000 | -3.096900000 |
| H | 2.148580000  | -3.537130000 | -2.898690000 |
| H | 4.140000000  | -2.434170000 | -3.896560000 |
| C | -0.688050000 | 0.556460000  | 1.147170000  |



|   |              |              |              |
|---|--------------|--------------|--------------|
| C | -0.194630000 | 0.329700000  | 2.478070000  |
| C | -1.880750000 | 1.314920000  | 0.984090000  |
| C | -0.932300000 | 0.835590000  | 3.569150000  |
| H | 0.491270000  | -0.506010000 | 2.626360000  |
| C | -2.541380000 | 1.834870000  | 2.087000000  |
| H | -2.293240000 | 1.434090000  | -0.017330000 |
| C | -2.044300000 | 1.640150000  | 3.396660000  |
| H | -0.579910000 | 0.610290000  | 4.588480000  |
| H | -2.560020000 | 2.081760000  | 4.248640000  |
| C | 2.158590000  | 0.641160000  | 1.032910000  |
| C | 1.573650000  | 1.781860000  | 1.688030000  |
| C | 3.327120000  | 0.036070000  | 1.555990000  |
| C | 2.249950000  | 2.330330000  | 2.819390000  |
| H | 0.875530000  | 2.420130000  | 1.077580000  |
| C | 3.973440000  | 0.576310000  | 2.651240000  |
| H | 3.701240000  | -0.885420000 | 1.088060000  |
| C | 3.421910000  | 1.773000000  | 3.261780000  |
| H | 1.843110000  | 3.226090000  | 3.293250000  |
| H | 3.966250000  | 2.235550000  | 4.100710000  |
| C | 5.198950000  | -0.016360000 | -3.248460000 |
| H | 6.030770000  | -0.045880000 | -2.529840000 |
| H | 5.500250000  | -0.537600000 | -4.170210000 |
| H | 4.969450000  | 1.031340000  | -3.493780000 |
| C | -3.818000000 | 2.594710000  | 1.905670000  |
| H | -4.657180000 | 1.893130000  | 2.015160000  |
| H | -3.905850000 | 3.383150000  | 2.666520000  |
| H | -3.859140000 | 3.052310000  | 0.907950000  |
| C | 5.224440000  | -0.037280000 | 3.190150000  |
| H | 6.000710000  | -0.051620000 | 2.406390000  |
| H | 5.600400000  | 0.541180000  | 4.051230000  |
| H | 5.031530000  | -1.074440000 | 3.516730000  |
| H | -0.904770000 | 1.769380000  | -4.236910000 |
| C | -3.252360000 | -2.112260000 | -3.153420000 |
| H | -4.270410000 | -1.718530000 | -3.003930000 |
| H | -3.142600000 | -2.442290000 | -4.197970000 |
| H | -3.105460000 | -2.978500000 | -2.489500000 |

### Coord\_7

|   |              |              |              |
|---|--------------|--------------|--------------|
| C | 0.000000000  | 0.000000000  | 0.000000000  |
| C | 1.410880000  | 0.000000000  | 0.000000000  |
| C | -0.655530000 | 0.000000000  | -1.334860000 |
| C | -1.530330000 | -1.046570000 | -1.653470000 |
| C | -0.436770000 | 1.030350000  | -2.263460000 |
| C | -2.171540000 | -1.073000000 | -2.897850000 |
| H | -1.710240000 | -1.840110000 | -0.919790000 |
| C | -1.072510000 | 0.997350000  | -3.505120000 |
| H | 0.246320000  | 1.851350000  | -2.021480000 |
| C | -1.936780000 | -0.047690000 | -3.824400000 |
| H | -2.433420000 | -0.070250000 | -4.802330000 |

|   |              |              |              |
|---|--------------|--------------|--------------|
| C | 2.148120000  | -0.756860000 | -1.026010000 |
| C | 1.706670000  | -2.039060000 | -1.379370000 |
| C | 3.296390000  | -0.204190000 | -1.619130000 |
| C | 2.420230000  | -2.765040000 | -2.320300000 |
| H | 0.808690000  | -2.443890000 | -0.907950000 |
| C | 3.990240000  | -0.931810000 | -2.579180000 |
| H | 3.625310000  | 0.798260000  | -1.327180000 |
| C | 3.554340000  | -2.216420000 | -2.927850000 |
| H | 2.087530000  | -3.769830000 | -2.605410000 |
| H | 4.103240000  | -2.792670000 | -3.682790000 |
| C | -0.665340000 | 0.658700000  | 1.098370000  |
| C | -0.130870000 | 0.581050000  | 2.438160000  |
| C | -1.877400000 | 1.380800000  | 0.897280000  |
| C | -0.859260000 | 1.181440000  | 3.491430000  |
| H | 0.517140000  | -0.266780000 | 2.665450000  |
| C | -2.515280000 | 2.000020000  | 1.958270000  |
| H | -2.323240000 | 1.382370000  | -0.095820000 |
| C | -1.979050000 | 1.956720000  | 3.269090000  |
| H | -0.480420000 | 1.058900000  | 4.519820000  |
| H | -2.477680000 | 2.482800000  | 4.080900000  |
| C | 2.160390000  | 0.724930000  | 0.966660000  |
| C | 1.525600000  | 1.867730000  | 1.587830000  |
| C | 3.355840000  | 0.188390000  | 1.514710000  |
| C | 2.194080000  | 2.488750000  | 2.693690000  |
| H | 0.855970000  | 2.494460000  | 0.923740000  |
| C | 3.986390000  | 0.799570000  | 2.575710000  |
| H | 3.756450000  | -0.743540000 | 1.089440000  |
| C | 3.391950000  | 2.000000000  | 3.137320000  |
| H | 1.757240000  | 3.386570000  | 3.133340000  |
| H | 3.931410000  | 2.523560000  | 3.944520000  |
| C | 5.205350000  | -0.347880000 | -3.234650000 |
| H | 6.008200000  | -0.236680000 | -2.491340000 |
| H | 5.557460000  | -1.001030000 | -4.048180000 |
| H | 4.960450000  | 0.639150000  | -3.654180000 |
| C | -3.812380000 | 2.713960000  | 1.738350000  |
| H | -4.631230000 | 2.011780000  | 1.947990000  |
| H | -3.894790000 | 3.575900000  | 2.414890000  |
| H | -3.893250000 | 3.062160000  | 0.700160000  |
| C | 5.262060000  | 0.260890000  | 3.136120000  |
| H | 6.002860000  | 0.131430000  | 2.328500000  |
| H | 5.677270000  | 0.951800000  | 3.890180000  |
| H | 5.084440000  | -0.719700000 | 3.613770000  |
| H | -0.890520000 | 1.795590000  | -4.235500000 |
| C | -3.121330000 | -2.177880000 | -3.240170000 |
| H | -4.155100000 | -1.813090000 | -3.133380000 |
| H | -2.960010000 | -2.509820000 | -4.277210000 |
| H | -2.975760000 | -3.036100000 | -2.565650000 |

Coord\_8

|   |             |             |             |
|---|-------------|-------------|-------------|
| C | 0.00000000  | 0.00000000  | 0.00000000  |
| C | 1.41983000  | 0.00000000  | 0.00000000  |
| C | -0.63055000 | 0.00000000  | -1.34779000 |
| C | -1.46370000 | -1.07320000 | -1.69581000 |
| C | -0.43302000 | 1.04747000  | -2.26258000 |
| C | -2.08178000 | -1.10708000 | -2.95079000 |
| H | -1.62693000 | -1.88096000 | -0.97356000 |
| C | -1.04389000 | 1.00752000  | -3.51568000 |
| H | 0.21507000  | 1.89045000  | -1.99859000 |
| C | -1.86652000 | -0.06435000 | -3.86244000 |
| H | -2.34348000 | -0.09317000 | -4.84973000 |
| C | 2.14669000  | -0.84799000 | -0.95971000 |
| C | 1.67751000  | -2.14414000 | -1.21224000 |
| C | 3.30562000  | -0.36701000 | -1.59091000 |
| C | 2.37982000  | -2.96007000 | -2.08887000 |
| H | 0.76990000  | -2.48940000 | -0.71271000 |
| C | 3.98747000  | -1.18528000 | -2.48842000 |
| H | 3.65218000  | 0.65015000  | -1.38273000 |
| C | 3.52625000  | -2.48538000 | -2.73271000 |
| H | 2.02651000  | -3.97706000 | -2.29324000 |
| H | 4.06585000  | -3.13179000 | -3.43606000 |
| C | -0.64261000 | 0.75642000  | 1.04011000  |
| C | -0.06746000 | 0.82749000  | 2.37110000  |
| C | -1.87296000 | 1.44165000  | 0.80723000  |
| C | -0.78617000 | 1.51914000  | 3.37877000  |
| H | 0.54148000  | -0.02130000 | 2.68519000  |
| C | -2.48791000 | 2.15666000  | 1.81691000  |
| H | -2.35118000 | 1.32845000  | -0.16301000 |
| C | -1.91335000 | 2.26308000  | 3.11063000  |
| H | -0.38090000 | 1.49881000  | 4.40523000  |
| H | -2.39526000 | 2.86958000  | 3.87342000  |
| C | 2.16221000  | 0.80204000  | 0.89371000  |
| C | 1.48264000  | 1.94441000  | 1.48564000  |
| C | 3.38367000  | 0.33483000  | 1.45874000  |
| C | 2.14673000  | 2.63431000  | 2.56073000  |
| H | 0.84194000  | 2.56227000  | 0.77513000  |
| C | 4.00027000  | 1.01343000  | 2.48046000  |
| H | 3.80897000  | -0.60501000 | 1.07480000  |
| C | 3.36846000  | 2.21150000  | 2.99656000  |
| H | 1.68353000  | 3.53234000  | 2.96930000  |
| H | 3.90481000  | 2.79252000  | 3.76736000  |
| C | 5.21088000  | -0.67719000 | -3.18795000 |
| H | 5.98268000  | -0.42146000 | -2.44727000 |
| H | 5.61177000  | -1.44104000 | -3.87246000 |
| H | 4.95454000  | 0.22039000  | -3.76980000 |
| C | -3.80430000 | 2.82413000  | 1.56641000  |
| H | -4.60115000 | 2.13438000  | 1.87608000  |
| H | -3.88187000 | 3.75034000  | 2.15185000  |
| H | -3.92480000 | 3.05932000  | 0.50112000  |
| C | 5.29938000  | 0.54983000  | 3.05371000  |

|   |              |              |              |
|---|--------------|--------------|--------------|
| H | 6.004930000  | 0.300840000  | 2.242100000  |
| H | 5.749100000  | 1.336950000  | 3.684170000  |
| H | 5.140930000  | -0.352420000 | 3.673210000  |
| H | -0.877020000 | 1.819220000  | -4.234790000 |
| C | -2.985560000 | -2.240800000 | -3.324260000 |
| H | -4.032430000 | -1.905250000 | -3.261240000 |
| H | -2.772380000 | -2.572930000 | -4.351630000 |
| H | -2.842740000 | -3.091170000 | -2.639310000 |

### Coord\_9

|   |              |              |              |
|---|--------------|--------------|--------------|
| C | 0.000000000  | 0.000000000  | 0.000000000  |
| C | 1.428780000  | 0.000000000  | 0.000000000  |
| C | -0.605320000 | 0.000000000  | -1.360240000 |
| C | -1.395030000 | -1.098470000 | -1.736650000 |
| C | -0.429870000 | 1.063080000  | -2.262160000 |
| C | -1.989310000 | -1.139900000 | -3.001970000 |
| H | -1.540850000 | -1.919210000 | -1.025110000 |
| C | -1.015230000 | 1.016230000  | -3.526360000 |
| H | 0.181770000  | 1.926820000  | -1.977040000 |
| C | -1.794460000 | -0.081160000 | -3.899560000 |
| H | -2.251170000 | -0.116180000 | -4.895960000 |
| C | 2.145200000  | -0.933230000 | -0.885240000 |
| C | 1.648560000  | -2.234890000 | -1.037080000 |
| C | 3.314460000  | -0.526600000 | -1.546670000 |
| C | 2.339330000  | -3.134940000 | -1.840910000 |
| H | 0.731720000  | -2.518570000 | -0.516100000 |
| C | 3.984080000  | -1.429960000 | -2.373150000 |
| H | 3.678600000  | 0.498000000  | -1.422700000 |
| C | 3.497700000  | -2.736640000 | -2.512890000 |
| H | 1.965570000  | -4.157260000 | -1.964490000 |
| H | 4.027840000  | -3.448470000 | -3.158160000 |
| C | -0.619890000 | 0.848700000  | 0.972840000  |
| C | -0.004490000 | 1.066000000  | 2.277530000  |
| C | -1.867380000 | 1.497490000  | 0.714080000  |
| C | -0.713070000 | 1.845040000  | 3.232130000  |
| H | 0.564610000  | 0.229250000  | 2.684250000  |
| C | -2.459250000 | 2.303880000  | 1.663370000  |
| H | -2.376940000 | 1.274130000  | -0.219290000 |
| C | -1.847230000 | 2.556090000  | 2.922120000  |
| H | -0.281410000 | 1.925200000  | 4.245870000  |
| H | -2.312840000 | 3.238020000  | 3.627570000  |
| C | 2.164060000  | 0.871970000  | 0.814720000  |
| C | 1.445150000  | 2.012460000  | 1.382310000  |
| C | 3.410580000  | 0.473980000  | 1.388730000  |
| C | 2.108520000  | 2.767390000  | 2.421640000  |
| H | 0.833440000  | 2.624690000  | 0.631940000  |
| C | 4.015100000  | 1.216190000  | 2.366520000  |
| H | 3.858680000  | -0.471630000 | 1.044640000  |
| C | 3.351980000  | 2.406760000  | 2.841060000  |

|   |              |              |              |
|---|--------------|--------------|--------------|
| H | 1.622710000  | 3.664480000  | 2.802320000  |
| H | 3.887090000  | 3.041430000  | 3.571050000  |
| C | 5.215530000  | -1.001060000 | -3.108630000 |
| H | 5.954580000  | -0.602070000 | -2.398310000 |
| H | 5.662940000  | -1.851100000 | -3.647430000 |
| H | 4.951610000  | -0.219450000 | -3.835980000 |
| C | -3.793650000 | 2.925470000  | 1.389990000  |
| H | -4.566880000 | 2.261060000  | 1.797900000  |
| H | -3.866990000 | 3.906140000  | 1.878590000  |
| H | -3.953610000 | 3.045760000  | 0.311260000  |
| C | 5.336380000  | 0.826870000  | 2.944050000  |
| H | 6.007440000  | 0.457220000  | 2.148900000  |
| H | 5.815690000  | 1.691440000  | 3.436980000  |
| H | 5.200590000  | 0.023390000  | 3.692790000  |
| H | -0.864150000 | 1.840290000  | -4.234880000 |
| C | -2.845170000 | -2.300890000 | -3.405440000 |
| H | -3.902440000 | -1.994800000 | -3.387130000 |
| H | -2.580010000 | -2.631490000 | -4.420930000 |
| H | -2.706500000 | -3.143660000 | -2.710350000 |

#### Coord\_10

|   |              |              |              |
|---|--------------|--------------|--------------|
| C | 0.000000000  | 0.000000000  | 0.000000000  |
| C | 1.437740000  | 0.000000000  | 0.000000000  |
| C | -0.579850000 | 0.000000000  | -1.372220000 |
| C | -1.324380000 | -1.122330000 | -1.775880000 |
| C | -0.427250000 | 1.077150000  | -2.262240000 |
| C | -1.894190000 | -1.171380000 | -3.051280000 |
| H | -1.452150000 | -1.954810000 | -1.074300000 |
| C | -0.986470000 | 1.023480000  | -3.537190000 |
| H | 0.146550000  | 1.960400000  | -1.956970000 |
| C | -1.720610000 | -0.098060000 | -3.935700000 |
| H | -2.156480000 | -0.139190000 | -4.940930000 |
| C | 2.143680000  | -1.011840000 | -0.803140000 |
| C | 1.619850000  | -2.310710000 | -0.855180000 |
| C | 3.322900000  | -0.681420000 | -1.486750000 |
| C | 2.298750000  | -3.288220000 | -1.578260000 |
| H | 0.694170000  | -2.531490000 | -0.319560000 |
| C | 3.980060000  | -1.663490000 | -2.234210000 |
| H | 3.704540000  | 0.343400000  | -1.446770000 |
| C | 3.468690000  | -2.967940000 | -2.270050000 |
| H | 1.904720000  | -4.309130000 | -1.621610000 |
| H | 3.989220000  | -3.739860000 | -2.851200000 |
| C | -0.597170000 | 0.934700000  | 0.897100000  |
| C | 0.057960000  | 1.293640000  | 2.158450000  |
| C | -1.860620000 | 1.548290000  | 0.617950000  |
| C | -0.640020000 | 2.155670000  | 3.052840000  |
| H | 0.586830000  | 0.483460000  | 2.661290000  |
| C | -2.429250000 | 2.440770000  | 1.498150000  |
| H | -2.400380000 | 1.221110000  | -0.265320000 |

|   |              |              |              |
|---|--------------|--------------|--------------|
| C | -1.780750000 | 2.832690000  | 2.704780000  |
| H | -0.182020000 | 2.333400000  | 4.043420000  |
| H | -2.230480000 | 3.584190000  | 3.345110000  |
| C | 2.165940000  | 0.934240000  | 0.730380000  |
| C | 1.413430000  | 2.072510000  | 1.278500000  |
| C | 3.436520000  | 0.604460000  | 1.305500000  |
| C | 2.079950000  | 2.888400000  | 2.277380000  |
| H | 0.830670000  | 2.682700000  | 0.494170000  |
| C | 4.030890000  | 1.406240000  | 2.235070000  |
| H | 3.905450000  | -0.345120000 | 0.999620000  |
| C | 3.342930000  | 2.585200000  | 2.672270000  |
| H | 1.575470000  | 3.784110000  | 2.633230000  |
| H | 3.878770000  | 3.269480000  | 3.357360000  |
| C | 5.219290000  | -1.316300000 | -2.997280000 |
| H | 5.924230000  | -0.780420000 | -2.344530000 |
| H | 5.710760000  | -2.225490000 | -3.378320000 |
| H | 4.951510000  | -0.674050000 | -3.848800000 |
| C | -3.780330000 | 3.018160000  | 1.209150000  |
| H | -4.528360000 | 2.391640000  | 1.711860000  |
| H | -3.850040000 | 4.043020000  | 1.596240000  |
| H | -3.979510000 | 3.023370000  | 0.130690000  |
| C | 5.373040000  | 1.089430000  | 2.808510000  |
| H | 6.010910000  | 0.601370000  | 2.050320000  |
| H | 5.876910000  | 2.010590000  | 3.153050000  |
| H | 5.262960000  | 0.403270000  | 3.670700000  |
| H | -0.851780000 | 1.858790000  | -4.235830000 |
| C | -2.700290000 | -2.358020000 | -3.483480000 |
| H | -3.765190000 | -2.081510000 | -3.510700000 |
| H | -2.383230000 | -2.685370000 | -4.484850000 |
| H | -2.567140000 | -3.193520000 | -2.778610000 |

### Coord\_11

|   |              |              |              |
|---|--------------|--------------|--------------|
| C | 0.000000000  | 0.000000000  | 0.000000000  |
| C | 1.439980000  | 0.000000000  | 0.000000000  |
| C | -0.620650000 | 0.000000000  | -1.350710000 |
| C | -1.235570000 | -1.176750000 | -1.810500000 |
| C | -0.613710000 | 1.141750000  | -2.167900000 |
| C | -1.828360000 | -1.212110000 | -3.075720000 |
| H | -1.241640000 | -2.063630000 | -1.166880000 |
| C | -1.204200000 | 1.103960000  | -3.429200000 |
| H | -0.137300000 | 2.062590000  | -1.813470000 |
| C | -1.811500000 | -0.069240000 | -3.886960000 |
| H | -2.267920000 | -0.097740000 | -4.883350000 |
| C | 2.143810000  | -0.793060000 | -1.024990000 |
| C | 1.852330000  | -2.158450000 | -1.146310000 |
| C | 3.094670000  | -0.186570000 | -1.858970000 |
| C | 2.531970000  | -2.920210000 | -2.093650000 |
| H | 1.103900000  | -2.605980000 | -0.487970000 |
| C | 3.755430000  | -0.954570000 | -2.822380000 |

|   |              |              |              |
|---|--------------|--------------|--------------|
| H | 3.297460000  | 0.884630000  | -1.761860000 |
| C | 3.475240000  | -2.323390000 | -2.933350000 |
| H | 2.317950000  | -3.990330000 | -2.191740000 |
| H | 3.996460000  | -2.926660000 | -3.687000000 |
| C | -0.631380000 | 0.640920000  | 1.084300000  |
| C | 0.080030000  | 0.819870000  | 2.368430000  |
| C | -1.989170000 | 1.094960000  | 0.996820000  |
| C | -0.637590000 | 1.546680000  | 3.396230000  |
| H | 0.515780000  | -0.124540000 | 2.751170000  |
| C | -2.581110000 | 1.762780000  | 2.038340000  |
| H | -2.551460000 | 0.854570000  | 0.095480000  |
| C | -1.858340000 | 2.066560000  | 3.239350000  |
| H | -0.119960000 | 1.703210000  | 4.358340000  |
| H | -2.335740000 | 2.672130000  | 4.008590000  |
| C | 2.156830000  | 0.732390000  | 0.932580000  |
| C | 1.404570000  | 1.685380000  | 1.782260000  |
| C | 3.515690000  | 0.398170000  | 1.251270000  |
| C | 2.122850000  | 2.181630000  | 2.961230000  |
| H | 0.940970000  | 2.538040000  | 1.166760000  |
| C | 4.149460000  | 0.949210000  | 2.325090000  |
| H | 4.020200000  | -0.352430000 | 0.624490000  |
| C | 3.425090000  | 1.874010000  | 3.163500000  |
| H | 1.598630000  | 2.868130000  | 3.629020000  |
| H | 3.975740000  | 2.320330000  | 4.009510000  |
| C | 4.750200000  | -0.314550000 | -3.739140000 |
| H | 5.364750000  | 0.410390000  | -3.184700000 |
| H | 5.412670000  | -1.073620000 | -4.183570000 |
| H | 4.213390000  | 0.207070000  | -4.544830000 |
| C | -4.010140000 | 2.195780000  | 1.954900000  |
| H | -4.619920000 | 1.495530000  | 2.543290000  |
| H | -4.125530000 | 3.207480000  | 2.369470000  |
| H | -4.359720000 | 2.190420000  | 0.913850000  |
| C | 5.570540000  | 0.631750000  | 2.654570000  |
| H | 6.104150000  | 0.268280000  | 1.759810000  |
| H | 6.085940000  | 1.531960000  | 3.033070000  |
| H | 5.610040000  | -0.152550000 | 3.433180000  |
| H | -1.195500000 | 1.995000000  | -4.069240000 |
| C | -2.499950000 | -2.456570000 | -3.569720000 |
| H | -3.590470000 | -2.310160000 | -3.553110000 |
| H | -2.177810000 | -2.676200000 | -4.598420000 |
| H | -2.245500000 | -3.314320000 | -2.927900000 |

### Coord\_12

|   |              |              |              |
|---|--------------|--------------|--------------|
| C | 0.000000000  | 0.000000000  | 0.000000000  |
| C | 1.442230000  | 0.000000000  | 0.000000000  |
| C | -0.660670000 | 0.000000000  | -1.327990000 |
| C | -1.145870000 | -1.207970000 | -1.854320000 |
| C | -0.802300000 | 1.187830000  | -2.060280000 |
| C | -1.765480000 | -1.225940000 | -3.106890000 |

|   |              |              |              |
|---|--------------|--------------|--------------|
| H | -1.027290000 | -2.132640000 | -1.278970000 |
| C | -1.427650000 | 1.167040000  | -3.305020000 |
| H | -0.422150000 | 2.128650000  | -1.649380000 |
| C | -1.908560000 | -0.034950000 | -3.832110000 |
| H | -2.388480000 | -0.048680000 | -4.817580000 |
| C | 2.143930000  | -0.526740000 | -1.188630000 |
| C | 2.134660000  | -1.905430000 | -1.439420000 |
| C | 2.810950000  | 0.349780000  | -2.057360000 |
| C | 2.807110000  | -2.405460000 | -2.551980000 |
| H | 1.610240000  | -2.574490000 | -0.752020000 |
| C | 3.470440000  | -0.157980000 | -3.180490000 |
| H | 2.796660000  | 1.426330000  | -1.858930000 |
| C | 3.468940000  | -1.538170000 | -3.424810000 |
| H | 2.812390000  | -3.483580000 | -2.750500000 |
| H | 3.986120000  | -1.937160000 | -4.305720000 |
| C | -0.663880000 | 0.316410000  | 1.181070000  |
| C | 0.078530000  | 0.330610000  | 2.474970000  |
| C | -2.080440000 | 0.555860000  | 1.192290000  |
| C | -0.682810000 | 0.907220000  | 3.596580000  |
| H | 0.408320000  | -0.713660000 | 2.737590000  |
| C | -2.714650000 | 0.974260000  | 2.328260000  |
| H | -2.636380000 | 0.394950000  | 0.265340000  |
| C | -1.970820000 | 1.218680000  | 3.541210000  |
| H | -0.143190000 | 1.065140000  | 4.543930000  |
| H | -2.497160000 | 1.657150000  | 4.393520000  |
| C | 2.147760000  | 0.488010000  | 1.080530000  |
| C | 1.397310000  | 1.178180000  | 2.171620000  |
| C | 3.563690000  | 0.269510000  | 1.194820000  |
| C | 2.168790000  | 1.320150000  | 3.429280000  |
| H | 1.060250000  | 2.212420000  | 1.809360000  |
| C | 4.230810000  | 0.558860000  | 2.347130000  |
| H | 4.085860000  | -0.181690000 | 0.340330000  |
| C | 3.496270000  | 1.085300000  | 3.479210000  |
| H | 1.637510000  | 1.694770000  | 4.311340000  |
| H | 4.065670000  | 1.257230000  | 4.405400000  |
| C | 4.165240000  | 0.767790000  | -4.129680000 |
| H | 4.552810000  | 1.646390000  | -3.592210000 |
| H | 5.005510000  | 0.255160000  | -4.622580000 |
| H | 3.448450000  | 1.100560000  | -4.894510000 |
| C | -4.189790000 | 1.206340000  | 2.358240000  |
| H | -4.660460000 | 0.436380000  | 2.988810000  |
| H | -4.406540000 | 2.198200000  | 2.784420000  |
| H | -4.615390000 | 1.150050000  | 1.345830000  |
| C | 5.702140000  | 0.351970000  | 2.486440000  |
| H | 6.160500000  | 0.139800000  | 1.506710000  |
| H | 6.170350000  | 1.256880000  | 2.909920000  |
| H | 5.898610000  | -0.498670000 | 3.162680000  |
| H | -1.547880000 | 2.096070000  | -3.875820000 |
| C | -2.302730000 | -2.503890000 | -3.673460000 |
| H | -3.401600000 | -2.490030000 | -3.619120000 |



|   |              |              |              |
|---|--------------|--------------|--------------|
| H | -1.991810000 | -2.611060000 | -4.723160000 |
| H | -1.927970000 | -3.367810000 | -3.103050000 |

Coord\_13

|   |              |              |              |
|---|--------------|--------------|--------------|
| C | 0.000000000  | 0.000000000  | 0.000000000  |
| C | 1.444480000  | 0.000000000  | 0.000000000  |
| C | -0.699880000 | 0.000000000  | -1.304090000 |
| C | -1.058750000 | -1.215690000 | -1.906010000 |
| C | -0.990020000 | 1.214230000  | -1.940120000 |
| C | -1.709360000 | -1.213590000 | -3.142780000 |
| H | -0.815340000 | -2.160470000 | -1.408510000 |
| C | -1.653680000 | 1.210670000  | -3.164990000 |
| H | -0.702460000 | 2.157370000  | -1.466580000 |
| C | -2.012090000 | 0.003030000  | -3.770090000 |
| H | -2.518600000 | 0.005480000  | -4.742120000 |
| C | 2.144030000  | -0.228070000 | -1.284150000 |
| C | 2.443230000  | -1.534230000 | -1.694050000 |
| C | 2.495980000  | 0.863550000  | -2.092110000 |
| C | 3.102230000  | -1.744500000 | -2.903120000 |
| H | 2.170270000  | -2.379340000 | -1.055470000 |
| C | 3.149410000  | 0.645870000  | -3.308420000 |
| H | 2.244400000  | 1.879910000  | -1.771500000 |
| C | 3.451550000  | -0.661350000 | -3.714110000 |
| H | 3.347730000  | -2.764130000 | -3.224180000 |
| H | 3.960770000  | -0.833850000 | -4.669440000 |
| C | -0.694650000 | -0.012240000 | 1.185060000  |
| C | 0.052270000  | -0.156200000 | 2.483400000  |
| C | -2.133630000 | -0.000610000 | 1.190280000  |
| C | -0.775840000 | 0.265920000  | 3.657230000  |
| H | 0.260340000  | -1.272020000 | 2.626630000  |
| C | -2.827790000 | 0.159240000  | 2.350840000  |
| H | -2.654790000 | -0.076270000 | 0.228660000  |
| C | -2.116480000 | 0.349560000  | 3.603610000  |
| H | -0.251640000 | 0.434910000  | 4.608960000  |
| H | -2.711190000 | 0.609750000  | 4.488910000  |
| C | 2.138730000  | 0.215360000  | 1.165620000  |
| C | 1.391660000  | 0.584130000  | 2.418650000  |
| C | 3.577830000  | 0.193990000  | 1.174800000  |
| C | 2.217600000  | 0.368830000  | 3.649070000  |
| H | 1.186760000  | 1.708210000  | 2.366940000  |
| C | 4.270460000  | 0.224510000  | 2.347010000  |
| H | 4.099490000  | 0.102090000  | 0.214860000  |
| C | 3.557120000  | 0.256100000  | 3.612830000  |
| H | 1.691860000  | 0.371470000  | 4.614930000  |
| H | 4.149130000  | 0.144980000  | 4.530560000  |
| C | 3.513670000  | 1.799800000  | -4.190250000 |
| H | 3.573010000  | 2.729680000  | -3.604370000 |
| H | 4.487180000  | 1.621770000  | -4.671510000 |
| H | 2.741990000  | 1.913250000  | -4.965620000 |

|   |              |              |              |
|---|--------------|--------------|--------------|
| C | -4.318820000 | 0.175420000  | 2.391540000  |
| H | -4.679000000 | -0.645110000 | 3.033860000  |
| H | -4.670600000 | 1.133760000  | 2.808590000  |
| H | -4.739890000 | 0.049760000  | 1.381860000  |
| C | 5.761320000  | 0.201140000  | 2.392240000  |
| H | 6.183540000  | 0.151070000  | 1.376510000  |
| H | 6.129500000  | 1.114580000  | 2.887890000  |
| H | 6.103720000  | -0.676670000 | 2.965210000  |
| H | -1.902820000 | 2.158930000  | -3.656700000 |
| C | -2.116100000 | -2.500400000 | -3.791230000 |
| H | -3.206580000 | -2.619260000 | -3.706850000 |
| H | -1.832500000 | -2.492910000 | -4.853940000 |
| H | -1.624450000 | -3.353940000 | -3.299600000 |

S<sub>0</sub>\_S<sub>1</sub>S<sub>0</sub>-pyr(C1)

Coord\_1

|   |              |              |              |
|---|--------------|--------------|--------------|
| C | 0.000000000  | 0.000000000  | 0.000000000  |
| C | 1.357180000  | 0.000000000  | 0.000000000  |
| C | -0.799570000 | 0.000000000  | -1.247810000 |
| C | -1.883800000 | -0.860940000 | -1.373810000 |
| C | -0.475230000 | 0.896680000  | -2.274830000 |
| C | -2.650610000 | -0.846140000 | -2.550830000 |
| H | -2.145660000 | -1.544010000 | -0.559690000 |
| C | -1.246900000 | 0.905130000  | -3.442410000 |
| H | 0.384810000  | 1.562700000  | -2.178590000 |
| C | -2.321480000 | 0.046030000  | -3.580670000 |
| H | -2.924180000 | 0.061090000  | -4.498640000 |
| C | 2.155780000  | -0.132230000 | -1.231860000 |
| C | 1.885010000  | -1.155580000 | -2.149720000 |
| C | 3.233470000  | 0.752640000  | -1.452740000 |
| C | 2.659530000  | -1.268420000 | -3.278340000 |
| H | 1.052660000  | -1.838990000 | -1.969230000 |
| C | 3.994110000  | 0.637180000  | -2.591190000 |
| H | 3.455360000  | 1.520270000  | -0.703410000 |
| C | 3.712780000  | -0.372350000 | -3.517670000 |
| H | 2.453210000  | -2.059170000 | -4.011900000 |
| H | 4.314140000  | -0.465840000 | -4.428960000 |
| C | -0.801240000 | 0.010890000  | 1.240310000  |
| C | -0.515750000 | -0.893380000 | 2.272650000  |
| C | -1.882950000 | 0.909200000  | 1.361310000  |
| C | -1.295120000 | -0.886200000 | 3.427630000  |
| H | 0.326860000  | -1.582080000 | 2.178080000  |
| C | -2.654300000 | 0.913610000  | 2.529300000  |
| H | -2.117080000 | 1.592540000  | 0.538950000  |
| C | -2.362080000 | 0.014900000  | 3.563750000  |
| H | -1.074400000 | -1.590440000 | 4.239150000  |

|   |              |              |              |
|---|--------------|--------------|--------------|
| H | -2.968200000 | 0.009910000  | 4.475800000  |
| C | 2.149940000  | 0.144810000  | 1.244230000  |
| C | 1.876350000  | 1.203730000  | 2.119880000  |
| C | 3.171500000  | -0.760860000 | 1.529530000  |
| C | 2.632740000  | 1.344810000  | 3.286460000  |
| H | 1.066440000  | 1.903700000  | 1.898930000  |
| C | 3.921480000  | -0.615170000 | 2.707450000  |
| H | 3.389600000  | -1.582220000 | 0.838860000  |
| C | 3.646460000  | 0.444190000  | 3.582480000  |
| H | 2.423310000  | 2.178660000  | 3.968100000  |
| H | 4.236290000  | 0.559180000  | 4.498820000  |
| C | 5.154310000  | 1.563520000  | -2.836390000 |
| H | 6.087070000  | 1.043120000  | -2.577270000 |
| H | 5.182260000  | 1.864650000  | -3.894260000 |
| H | 5.062710000  | 2.468180000  | -2.215690000 |
| C | -3.813090000 | 1.850250000  | 2.659520000  |
| H | -4.728440000 | 1.337530000  | 2.324520000  |
| H | -3.937550000 | 2.161500000  | 3.708290000  |
| H | -3.656940000 | 2.746450000  | 2.040060000  |
| C | 5.031930000  | -1.567530000 | 3.013260000  |
| H | 5.969450000  | -1.170720000 | 2.592380000  |
| H | 5.150500000  | -1.684760000 | 4.101850000  |
| H | 4.830480000  | -2.553910000 | 2.568690000  |
| H | -0.991050000 | 1.600170000  | -4.251570000 |
| C | -3.833050000 | -1.748200000 | -2.688200000 |
| H | -4.737000000 | -1.217110000 | -2.344910000 |
| H | -3.970710000 | -2.044100000 | -3.740610000 |
| H | -3.701480000 | -2.654790000 | -2.076910000 |

## Coord\_2

|   |              |              |              |
|---|--------------|--------------|--------------|
| C | 0.000000000  | 0.000000000  | 0.000000000  |
| C | 1.366480000  | 0.000000000  | 0.000000000  |
| C | -0.712430000 | 0.000000000  | -1.305530000 |
| C | -1.747210000 | -0.903840000 | -1.535090000 |
| C | -0.372960000 | 0.956260000  | -2.272000000 |
| C | -2.451270000 | -0.860990000 | -2.749360000 |
| H | -2.017870000 | -1.639200000 | -0.771260000 |
| C | -1.077690000 | 0.989600000  | -3.480420000 |
| H | 0.447620000  | 1.655620000  | -2.095090000 |
| C | -2.106020000 | 0.094240000  | -3.718560000 |
| H | -2.658710000 | 0.130500000  | -4.666720000 |
| C | 2.179550000  | -0.260580000 | -1.203650000 |
| C | 1.923900000  | -1.382480000 | -2.002820000 |
| C | 3.246160000  | 0.608680000  | -1.518220000 |
| C | 2.709180000  | -1.613900000 | -3.108940000 |
| H | 1.098220000  | -2.051170000 | -1.751580000 |
| C | 4.019240000  | 0.371810000  | -2.632690000 |
| H | 3.448780000  | 1.465380000  | -0.866440000 |
| C | 3.755930000  | -0.740260000 | -3.439680000 |

|   |              |              |              |
|---|--------------|--------------|--------------|
| H | 2.513660000  | -2.483160000 | -3.750180000 |
| H | 4.366410000  | -0.930340000 | -4.329730000 |
| C | -0.786910000 | -0.143340000 | 1.240720000  |
| C | -0.359270000 | -1.023810000 | 2.245110000  |
| C | -1.970850000 | 0.603990000  | 1.408730000  |
| C | -1.102650000 | -1.146360000 | 3.417000000  |
| H | 0.567360000  | -1.588940000 | 2.118130000  |
| C | -2.707310000 | 0.484450000  | 2.592360000  |
| H | -2.309040000 | 1.272150000  | 0.610570000  |
| C | -2.278930000 | -0.391780000 | 3.597990000  |
| H | -0.768900000 | -1.832860000 | 4.205130000  |
| H | -2.858380000 | -0.494860000 | 4.521530000  |
| C | 2.140700000  | 0.296900000  | 1.226880000  |
| C | 1.768160000  | 1.389030000  | 2.022040000  |
| C | 3.226380000  | -0.502640000 | 1.587050000  |
| C | 2.493430000  | 1.675120000  | 3.181070000  |
| H | 0.904380000  | 1.996270000  | 1.739340000  |
| C | 3.942580000  | -0.213970000 | 2.758180000  |
| H | 3.516020000  | -1.354680000 | 0.963060000  |
| C | 3.571850000  | 0.883270000  | 3.550150000  |
| H | 2.206910000  | 2.534380000  | 3.799510000  |
| H | 4.136700000  | 1.110410000  | 4.461470000  |
| C | 5.169090000  | 1.279010000  | -2.973680000 |
| H | 6.111110000  | 0.780870000  | -2.703560000 |
| H | 5.167050000  | 1.502620000  | -4.050910000 |
| H | 5.091020000  | 2.225970000  | -2.417440000 |
| C | -3.968720000 | 1.267520000  | 2.774490000  |
| H | -4.830370000 | 0.628050000  | 2.525920000  |
| H | -4.059490000 | 1.604130000  | 3.819040000  |
| H | -3.974840000 | 2.149530000  | 2.116110000  |
| C | 5.115560000  | -1.054310000 | 3.148660000  |
| H | 6.036970000  | -0.581900000 | 2.773120000  |
| H | 5.178100000  | -1.138790000 | 4.244830000  |
| H | 5.030640000  | -2.063480000 | 2.717910000  |
| H | -0.808700000 | 1.732470000  | -4.241050000 |
| C | -3.583480000 | -1.804840000 | -2.994600000 |
| H | -4.530040000 | -1.318270000 | -2.705560000 |
| H | -3.632150000 | -2.077270000 | -4.060940000 |
| H | -3.459600000 | -2.721840000 | -2.397530000 |

### Coord\_3

|   |              |              |              |
|---|--------------|--------------|--------------|
| C | 0.000000000  | 0.000000000  | 0.000000000  |
| C | 1.375780000  | 0.000000000  | 0.000000000  |
| C | -0.621110000 | 0.000000000  | -1.357140000 |
| C | -1.595460000 | -0.944200000 | -1.684730000 |
| C | -0.277040000 | 1.010930000  | -2.264400000 |
| C | -2.237700000 | -0.876560000 | -2.931050000 |
| H | -1.866140000 | -1.727470000 | -0.970470000 |
| C | -0.915510000 | 1.066400000  | -3.508010000 |

|   |              |              |              |
|---|--------------|--------------|--------------|
| H | 0.495650000  | 1.741730000  | -2.011700000 |
| C | -1.887650000 | 0.136560000  | -3.839900000 |
| H | -2.391210000 | 0.191510000  | -4.814000000 |
| C | 2.203260000  | -0.384410000 | -1.162020000 |
| C | 1.962680000  | -1.591000000 | -1.831790000 |
| C | 3.258710000  | 0.458840000  | -1.569710000 |
| C | 2.758710000  | -1.937540000 | -2.902920000 |
| H | 1.143710000  | -2.237410000 | -1.510750000 |
| C | 4.044280000  | 0.104340000  | -2.647160000 |
| H | 3.442000000  | 1.391910000  | -1.026220000 |
| C | 3.799000000  | -1.095990000 | -3.323110000 |
| H | 2.573940000  | -2.874510000 | -3.443350000 |
| H | 4.418590000  | -1.379190000 | -4.181660000 |
| C | -0.772490000 | -0.297450000 | 1.221740000  |
| C | -0.226090000 | -1.134600000 | 2.206360000  |
| C | -2.041470000 | 0.284570000  | 1.411810000  |
| C | -0.938580000 | -1.381640000 | 3.377600000  |
| H | 0.769370000  | -1.564450000 | 2.067360000  |
| C | -2.749080000 | 0.044980000  | 2.594170000  |
| H | -2.466890000 | 0.923790000  | 0.632000000  |
| C | -2.206550000 | -0.790900000 | 3.578520000  |
| H | -0.510040000 | -2.034530000 | 4.148650000  |
| H | -2.763740000 | -0.989280000 | 4.500250000  |
| C | 2.131340000  | 0.446790000  | 1.190620000  |
| C | 1.665340000  | 1.558110000  | 1.906510000  |
| C | 3.276210000  | -0.235630000 | 1.607430000  |
| C | 2.359190000  | 1.986090000  | 3.040040000  |
| H | 0.753290000  | 2.063120000  | 1.577920000  |
| C | 3.958810000  | 0.193040000  | 2.754060000  |
| H | 3.633860000  | -1.107750000 | 1.049990000  |
| C | 3.496980000  | 1.313630000  | 3.463560000  |
| H | 1.999930000  | 2.859880000  | 3.596280000  |
| H | 4.036860000  | 1.650570000  | 4.356020000  |
| C | 5.183710000  | 0.982060000  | -3.082880000 |
| H | 6.133920000  | 0.504250000  | -2.803880000 |
| H | 5.151410000  | 1.126420000  | -4.173030000 |
| H | 5.120400000  | 1.967040000  | -2.594820000 |
| C | -4.096780000 | 0.660250000  | 2.801880000  |
| H | -4.875070000 | -0.098180000 | 2.621930000  |
| H | -4.187220000 | 1.030530000  | 3.835160000  |
| H | -4.249030000 | 1.501990000  | 2.109130000  |
| C | 5.189320000  | -0.523600000 | 3.209810000  |
| H | 6.077480000  | 0.028430000  | 2.864480000  |
| H | 5.209630000  | -0.582940000 | 4.309140000  |
| H | 5.220050000  | -1.543500000 | 2.797390000  |
| H | -0.641860000 | 1.853220000  | -4.220930000 |
| C | -3.308760000 | -1.860130000 | -3.278130000 |
| H | -4.292800000 | -1.419160000 | -3.048440000 |
| H | -3.268500000 | -2.108390000 | -4.350500000 |
| H | -3.189450000 | -2.785520000 | -2.693330000 |

## Coord\_4

|   |             |             |             |
|---|-------------|-------------|-------------|
| C | 0.00000000  | 0.00000000  | 0.00000000  |
| C | 1.38508000  | 0.00000000  | 0.00000000  |
| C | -0.52605000 | 0.00000000  | -1.40235000 |
| C | -1.42959000 | -0.98192000 | -1.82121000 |
| C | -0.18740000 | 1.06038000  | -2.25330000 |
| C | -2.01120000 | -0.89305000 | -3.09500000 |
| H | -1.69186000 | -1.80842000 | -1.15446000 |
| C | -0.76059000 | 1.13488000  | -3.52705000 |
| H | 0.52957000  | 1.82068000  | -1.93062000 |
| C | -1.66731000 | 0.17233000  | -3.94555000 |
| H | -2.12279000 | 0.24316000  | -4.94186000 |
| C | 2.22690000  | -0.50230000 | -1.10764000 |
| C | 2.00135000  | -1.77857000 | -1.63891000 |
| C | 3.27113000  | 0.30443000  | -1.60666000 |
| C | 2.80811000  | -2.23545000 | -2.66303000 |
| H | 1.18913000  | -2.39512000 | -1.24984000 |
| C | 4.06924000  | -0.16248000 | -2.63457000 |
| H | 3.43506000  | 1.29989000  | -1.18051000 |
| C | 3.84197000  | -1.43547000 | -3.16966000 |
| H | 2.63406000  | -3.22839000 | -3.09542000 |
| H | 4.47066000  | -1.80725000 | -3.98693000 |
| C | -0.75798000 | -0.44898000 | 1.18341000  |
| C | -0.12026000 | -1.22871000 | 2.16123000  |
| C | -2.09268000 | -0.04061000 | 1.36710000  |
| C | -0.80886000 | -1.59406000 | 3.31550000  |
| H | 0.92695000  | -1.51674000 | 2.03351000  |
| C | -2.77887000 | -0.39547000 | 2.53234000  |
| H | -2.58581000 | 0.55961000  | 0.59635000  |
| C | -2.14782000 | -1.17796000 | 3.50746000  |
| H | -0.30699000 | -2.20170000 | 4.07965000  |
| H | -2.68818000 | -1.46807000 | 4.41484000  |
| C | 2.12187000  | 0.59209000  | 1.13574000  |
| C | 1.56893000  | 1.70977000  | 1.77654000  |
| C | 3.32045000  | 0.03463000  | 1.58884000  |
| C | 2.23148000  | 2.27429000  | 2.86745000  |
| H | 0.61466000  | 2.10592000  | 1.41974000  |
| C | 3.97000000  | 0.59818000  | 2.69410000  |
| H | 3.74194000  | -0.84765000 | 1.09572000  |
| C | 3.42277000  | 1.72861000  | 3.32472000  |
| H | 1.80463000  | 3.15267000  | 3.36479000  |
| H | 3.93804000  | 2.17135000  | 4.18513000  |
| C | 5.19821000  | 0.67541000  | -3.16280000 |
| H | 6.15545000  | 0.21573000  | -2.87654000 |
| H | 5.13546000  | 0.73944000  | -4.25922000 |
| H | 5.15086000  | 1.69371000  | -2.74642000 |
| C | -4.19456000 | 0.04371000  | 2.73583000  |
| H | -4.86806000 | -0.81875000 | 2.60904000  |

|   |              |              |              |
|---|--------------|--------------|--------------|
| H | -4.318190000 | 0.450120000  | 3.752110000  |
| H | -4.467370000 | 0.822330000  | 2.007080000  |
| C | 5.252610000  | 0.013630000  | 3.193650000  |
| H | 6.092080000  | 0.645030000  | 2.863330000  |
| H | 5.245830000  | -0.027000000 | 4.293900000  |
| H | 5.395000000  | -1.004370000 | 2.800410000  |
| H | -0.490330000 | 1.961540000  | -4.194380000 |
| C | -3.010860000 | -1.914200000 | -3.536750000 |
| H | -4.026630000 | -1.519820000 | -3.370960000 |
| H | -2.882420000 | -2.137660000 | -4.607440000 |
| H | -2.893390000 | -2.845900000 | -2.961820000 |

### Coord\_5

|   |              |              |              |
|---|--------------|--------------|--------------|
| C | 0.000000000  | 0.000000000  | 0.000000000  |
| C | 1.394380000  | 0.000000000  | 0.000000000  |
| C | -0.427700000 | 0.000000000  | -1.440890000 |
| C | -1.250820000 | -1.016880000 | -1.943110000 |
| C | -0.103750000 | 1.104340000  | -2.239910000 |
| C | -1.773120000 | -0.910610000 | -3.240420000 |
| H | -1.496780000 | -1.881670000 | -1.320550000 |
| C | -0.612790000 | 1.194460000  | -3.539350000 |
| H | 0.550320000  | 1.892140000  | -1.853890000 |
| C | -1.445650000 | 0.200950000  | -4.036390000 |
| H | -1.854220000 | 0.284600000  | -5.051690000 |
| C | 2.250460000  | -0.612940000 | -1.041290000 |
| C | 2.039890000  | -1.942890000 | -1.426720000 |
| C | 3.283450000  | 0.146850000  | -1.628620000 |
| C | 2.857380000  | -2.504050000 | -2.392430000 |
| H | 1.234450000  | -2.522140000 | -0.972250000 |
| C | 4.094120000  | -0.425940000 | -2.595160000 |
| H | 3.427970000  | 1.189630000  | -1.327060000 |
| C | 3.884850000  | -1.754870000 | -2.981460000 |
| H | 2.694000000  | -3.540450000 | -2.710930000 |
| H | 4.522630000  | -2.209630000 | -3.748280000 |
| C | -0.743380000 | -0.595480000 | 1.126090000  |
| C | -0.045000000 | -1.310410000 | 2.112950000  |
| C | -2.122770000 | -0.362280000 | 1.273030000  |
| C | -0.718210000 | -1.787500000 | 3.234850000  |
| H | 1.035390000  | -1.455940000 | 2.021300000  |
| C | -2.796000000 | -0.827090000 | 2.406050000  |
| H | -2.661960000 | 0.193490000  | 0.499900000  |
| C | -2.104970000 | -1.549220000 | 3.386750000  |
| H | -0.167000000 | -2.343530000 | 4.004680000  |
| H | -2.634670000 | -1.926990000 | 4.267820000  |
| C | 2.112300000  | 0.730460000  | 1.062850000  |
| C | 1.479910000  | 1.843470000  | 1.635330000  |
| C | 3.358560000  | 0.302250000  | 1.530380000  |
| C | 2.111730000  | 2.537240000  | 2.667570000  |
| H | 0.489830000  | 2.127400000  | 1.269210000  |

|   |              |              |              |
|---|--------------|--------------|--------------|
| C | 3.976030000  | 0.993650000  | 2.578450000  |
| H | 3.839140000  | -0.581400000 | 1.097440000  |
| C | 3.350140000  | 2.122060000  | 3.136460000  |
| H | 1.623190000  | 3.411680000  | 3.111270000  |
| H | 3.841530000  | 2.665070000  | 3.952460000  |
| C | 5.212600000  | 0.361910000  | -3.212490000 |
| H | 6.175660000  | -0.082030000 | -2.920100000 |
| H | 5.119280000  | 0.345220000  | -4.308430000 |
| H | 5.182390000  | 1.408430000  | -2.871030000 |
| C | -4.259710000 | -0.565490000 | 2.573530000  |
| H | -4.816410000 | -1.512350000 | 2.488470000  |
| H | -4.447680000 | -0.126110000 | 3.566110000  |
| H | -4.619700000 | 0.133130000  | 1.802640000  |
| C | 5.304930000  | 0.545870000  | 3.098820000  |
| H | 6.082350000  | 1.252430000  | 2.769440000  |
| H | 5.287060000  | 0.519210000  | 4.199290000  |
| H | 5.551890000  | -0.458280000 | 2.722040000  |
| H | -0.353440000 | 2.056610000  | -4.164360000 |
| C | -2.691890000 | -1.967140000 | -3.768590000 |
| H | -3.733110000 | -1.620270000 | -3.670600000 |
| H | -2.476690000 | -2.165250000 | -4.830120000 |
| H | -2.574010000 | -2.903040000 | -3.200750000 |

#### Coord\_6

|   |              |              |              |
|---|--------------|--------------|--------------|
| C | 0.000000000  | 0.000000000  | 0.000000000  |
| C | 1.403680000  | 0.000000000  | 0.000000000  |
| C | -0.326530000 | 0.000000000  | -1.472520000 |
| C | -1.060500000 | -1.048990000 | -2.049150000 |
| C | -0.025590000 | 1.142540000  | -2.225330000 |
| C | -1.524790000 | -0.929390000 | -3.366580000 |
| H | -1.282980000 | -1.946910000 | -1.466310000 |
| C | -0.471670000 | 1.244600000  | -3.546540000 |
| H | 0.559150000  | 1.955830000  | -1.783360000 |
| C | -1.223110000 | 0.221880000  | -4.113210000 |
| H | -1.585910000 | 0.315060000  | -5.144770000 |
| C | 2.273960000  | -0.715120000 | -0.963920000 |
| C | 2.078310000  | -2.081950000 | -1.198020000 |
| C | 3.295660000  | -0.012470000 | -1.635270000 |
| C | 2.906520000  | -2.740190000 | -2.094670000 |
| H | 1.279680000  | -2.616670000 | -0.681640000 |
| C | 4.118940000  | -0.683320000 | -2.529450000 |
| H | 3.420780000  | 1.061720000  | -1.463580000 |
| C | 3.927650000  | -2.050610000 | -2.761010000 |
| H | 2.753750000  | -3.806910000 | -2.294890000 |
| H | 4.574510000  | -2.581810000 | -3.468950000 |
| C | -0.728690000 | -0.734530000 | 1.050450000  |
| C | -0.002570000 | -1.384700000 | 2.062750000  |
| C | -2.130490000 | -0.670780000 | 1.130070000  |
| C | -0.669880000 | -1.966790000 | 3.137400000  |



|   |              |              |              |
|---|--------------|--------------|--------------|
| H | 1.091360000  | -1.393210000 | 2.032000000  |
| C | -2.799840000 | -1.239860000 | 2.216160000  |
| H | -2.692570000 | -0.159850000 | 0.342560000  |
| C | -2.079410000 | -1.901350000 | 3.217960000  |
| H | -0.095120000 | -2.470710000 | 3.926030000  |
| H | -2.605090000 | -2.362320000 | 4.061060000  |
| C | 2.102620000  | 0.859630000  | 0.972840000  |
| C | 1.399210000  | 1.959350000  | 1.485830000  |
| C | 3.390080000  | 0.561080000  | 1.432080000  |
| C | 2.001280000  | 2.773290000  | 2.444640000  |
| H | 0.380020000  | 2.131140000  | 1.129880000  |
| C | 3.976810000  | 1.371600000  | 2.408400000  |
| H | 3.924450000  | -0.316680000 | 1.053620000  |
| C | 3.280020000  | 2.488360000  | 2.902270000  |
| H | 1.457670000  | 3.637130000  | 2.841550000  |
| H | 3.748600000  | 3.124820000  | 3.662450000  |
| C | 5.226890000  | 0.044530000  | -3.231320000 |
| H | 6.194520000  | -0.386150000 | -2.933340000 |
| H | 5.102980000  | -0.052590000 | -4.319970000 |
| H | 5.214990000  | 1.113750000  | -2.967660000 |
| C | -4.290300000 | -1.150100000 | 2.315500000  |
| H | -4.728110000 | -2.159900000 | 2.265360000  |
| H | -4.568930000 | -0.685240000 | 3.274770000  |
| H | -4.698310000 | -0.540630000 | 1.494430000  |
| C | 5.345830000  | 1.061280000  | 2.925780000  |
| H | 6.050340000  | 1.835540000  | 2.585270000  |
| H | 5.333210000  | 1.045840000  | 4.026450000  |
| H | 5.687410000  | 0.081240000  | 2.559550000  |
| H | -0.230010000 | 2.137710000  | -4.133610000 |
| C | -2.354070000 | -2.019030000 | -3.971960000 |
| H | -3.414010000 | -1.720500000 | -3.944970000 |
| H | -2.054180000 | -2.191330000 | -5.017120000 |
| H | -2.234040000 | -2.956990000 | -3.408120000 |

### Coord\_7

|   |              |              |              |
|---|--------------|--------------|--------------|
| C | 0.000000000  | 0.000000000  | 0.000000000  |
| C | 1.412980000  | 0.000000000  | 0.000000000  |
| C | -0.223020000 | 0.000000000  | -1.497020000 |
| C | -0.860120000 | -1.078170000 | -2.138190000 |
| C | 0.047710000  | 1.174760000  | -2.210500000 |
| C | -1.267580000 | -0.949490000 | -3.472840000 |
| H | -1.052840000 | -2.003820000 | -1.589570000 |
| C | -0.336500000 | 1.284840000  | -3.550100000 |
| H | 0.557530000  | 2.011490000  | -1.720690000 |
| C | -0.999920000 | 0.234650000  | -4.176730000 |
| H | -1.317950000 | 0.333890000  | -5.222240000 |
| C | 2.297380000  | -0.807750000 | -0.876560000 |
| C | 2.116600000  | -2.194110000 | -0.955810000 |
| C | 3.307770000  | -0.172060000 | -1.626450000 |

|   |              |              |              |
|---|--------------|--------------|--------------|
| C | 2.955500000  | -2.941090000 | -1.773630000 |
| H | 1.324780000  | -2.677390000 | -0.381820000 |
| C | 4.143700000  | -0.932010000 | -2.438240000 |
| H | 3.413510000  | 0.917060000  | -1.587860000 |
| C | 3.970350000  | -2.319420000 | -2.511230000 |
| H | 2.813290000  | -4.024570000 | -1.852680000 |
| H | 4.626280000  | -2.919660000 | -3.152660000 |
| C | -0.713920000 | -0.863840000 | 0.957490000  |
| C | 0.005800000  | -1.456600000 | 2.009780000  |
| C | -2.115100000 | -0.956630000 | 0.940810000  |
| C | -0.665530000 | -2.136810000 | 3.022270000  |
| H | 1.093040000  | -1.339660000 | 2.063140000  |
| C | -2.789810000 | -1.623860000 | 1.965270000  |
| H | -2.676040000 | -0.485840000 | 0.128000000  |
| C | -2.071720000 | -2.231080000 | 3.002200000  |
| H | -0.093950000 | -2.593910000 | 3.841530000  |
| H | -2.600150000 | -2.770360000 | 3.795710000  |
| C | 2.092840000  | 0.977460000  | 0.866920000  |
| C | 1.327670000  | 2.058060000  | 1.330630000  |
| C | 3.414600000  | 0.804910000  | 1.295000000  |
| C | 1.901400000  | 2.981590000  | 2.202690000  |
| H | 0.286280000  | 2.121350000  | 1.004270000  |
| C | 3.972300000  | 1.724380000  | 2.186400000  |
| H | 3.996910000  | -0.061520000 | 0.964160000  |
| C | 3.213290000  | 2.822570000  | 2.626180000  |
| H | 1.309970000  | 3.830350000  | 2.560740000  |
| H | 3.660460000  | 3.544520000  | 3.320220000  |
| C | 5.241100000  | -0.273700000 | -3.218890000 |
| H | 6.211980000  | -0.693630000 | -2.915330000 |
| H | 5.086660000  | -0.450260000 | -4.293510000 |
| H | 5.248670000  | 0.812280000  | -3.035550000 |
| C | -4.284840000 | -1.692950000 | 1.965790000  |
| H | -4.611420000 | -2.745130000 | 1.947830000  |
| H | -4.673470000 | -1.212230000 | 2.878000000  |
| H | -4.698410000 | -1.173450000 | 1.087530000  |
| C | 5.374950000  | 1.548070000  | 2.676890000  |
| H | 5.998440000  | 2.380130000  | 2.315860000  |
| H | 5.383750000  | 1.543050000  | 3.777610000  |
| H | 5.798550000  | 0.599750000  | 2.312800000  |
| H | -0.118420000 | 2.204190000  | -4.104550000 |
| C | -1.999770000 | -2.069920000 | -4.145310000 |
| H | -3.071300000 | -1.820460000 | -4.191760000 |
| H | -1.617840000 | -2.215990000 | -5.167250000 |
| H | -1.876390000 | -3.007770000 | -3.582150000 |

Coord\_8

|   |              |             |              |
|---|--------------|-------------|--------------|
| C | 0.000000000  | 0.000000000 | 0.000000000  |
| C | 1.422280000  | 0.000000000 | 0.000000000  |
| C | -0.117680000 | 0.000000000 | -1.514230000 |

|   |              |              |              |
|---|--------------|--------------|--------------|
| C | -0.651310000 | -1.104330000 | -2.209210000 |
| C | 0.116940000  | 1.200820000  | -2.196250000 |
| C | -1.002880000 | -0.971010000 | -3.558610000 |
| H | -0.808970000 | -2.052170000 | -1.688450000 |
| C | -0.206300000 | 1.314790000  | -3.551250000 |
| H | 0.547140000  | 2.058880000  | -1.667260000 |
| C | -0.776130000 | 0.238860000  | -4.227530000 |
| H | -1.050180000 | 0.340520000  | -5.285030000 |
| C | 2.320720000  | -0.889840000 | -0.780390000 |
| C | 2.154740000  | -2.278050000 | -0.703250000 |
| C | 3.319800000  | -0.330410000 | -1.602100000 |
| C | 3.004330000  | -3.104480000 | -1.433450000 |
| H | 1.369770000  | -2.703390000 | -0.076760000 |
| C | 4.168420000  | -1.169470000 | -2.322590000 |
| H | 3.406190000  | 0.756810000  | -1.697720000 |
| C | 4.012970000  | -2.558400000 | -2.235330000 |
| H | 2.872630000  | -4.190870000 | -1.390030000 |
| H | 4.677940000  | -3.219510000 | -2.803550000 |
| C | -0.699070000 | -0.981220000 | 0.848470000  |
| C | -0.019980000 | -1.530390000 | 1.951150000  |
| C | -2.076370000 | -1.210990000 | 0.709930000  |
| C | -0.705090000 | -2.301440000 | 2.886100000  |
| H | 1.040170000  | -1.305120000 | 2.108690000  |
| C | -2.765360000 | -1.969560000 | 1.657690000  |
| H | -2.611980000 | -0.771110000 | -0.136490000 |
| C | -2.081550000 | -2.534820000 | 2.740210000  |
| H | -0.163540000 | -2.722160000 | 3.744680000  |
| H | -2.619270000 | -3.146920000 | 3.472330000  |
| C | 2.082970000  | 1.081960000  | 0.746530000  |
| C | 1.266050000  | 2.140660000  | 1.171870000  |
| C | 3.431750000  | 1.027660000  | 1.121230000  |
| C | 1.813250000  | 3.161980000  | 1.945380000  |
| H | 0.209520000  | 2.102600000  | 0.893740000  |
| C | 3.962450000  | 2.044690000  | 1.916030000  |
| H | 4.055700000  | 0.175960000  | 0.830460000  |
| C | 3.150770000  | 3.120360000  | 2.312640000  |
| H | 1.181820000  | 3.993510000  | 2.273000000  |
| H | 3.578270000  | 3.918910000  | 2.931330000  |
| C | 5.255250000  | -0.589700000 | -3.175150000 |
| H | 6.228030000  | -1.001280000 | -2.865430000 |
| H | 5.070430000  | -0.844020000 | -4.229130000 |
| H | 5.283390000  | 0.506750000  | -3.074180000 |
| C | -4.242260000 | -2.177660000 | 1.531890000  |
| H | -4.474200000 | -3.254810000 | 1.545920000  |
| H | -4.751600000 | -1.690230000 | 2.379000000  |
| H | -4.618310000 | -1.741390000 | 0.593450000  |
| C | 5.392010000  | 1.994750000  | 2.356370000  |
| H | 5.929340000  | 2.873310000  | 1.968490000  |
| H | 5.437700000  | 2.001000000  | 3.456080000  |
| H | 5.882720000  | 1.082490000  | 1.984450000  |

|   |              |              |              |
|---|--------------|--------------|--------------|
| H | -0.016680000 | 2.255520000  | -4.079210000 |
| C | -1.631430000 | -2.119820000 | -4.287300000 |
| H | -2.707150000 | -1.920070000 | -4.408840000 |
| H | -1.170680000 | -2.239350000 | -5.279550000 |
| H | -1.504130000 | -3.055370000 | -3.721330000 |

Coord\_9

|   |              |              |              |
|---|--------------|--------------|--------------|
| C | 0.000000000  | 0.000000000  | 0.000000000  |
| C | 1.431580000  | 0.000000000  | 0.000000000  |
| C | -0.011020000 | 0.000000000  | -1.524010000 |
| C | -0.435770000 | -1.127390000 | -2.261400000 |
| C | 0.183020000  | 1.220540000  | -2.183200000 |
| C | -0.732110000 | -0.993990000 | -3.623390000 |
| H | -0.554250000 | -2.091740000 | -1.761440000 |
| C | -0.079910000 | 1.334130000  | -3.550940000 |
| H | 0.529850000  | 2.097820000  | -1.624180000 |
| C | -0.551650000 | 0.234220000  | -4.266020000 |
| H | -0.782250000 | 0.334530000  | -5.333810000 |
| C | 2.343990000  | -0.960590000 | -0.676670000 |
| C | 2.192730000  | -2.332850000 | -0.443640000 |
| C | 3.331760000  | -0.486010000 | -1.562350000 |
| C | 3.053010000  | -3.228560000 | -1.078510000 |
| H | 1.414610000  | -2.694270000 | 0.229470000  |
| C | 4.193090000  | -1.393290000 | -2.183810000 |
| H | 3.398850000  | 0.582450000  | -1.791150000 |
| C | 4.055490000  | -2.764990000 | -1.936820000 |
| H | 2.931740000  | -4.303930000 | -0.912910000 |
| H | 4.729500000  | -3.478170000 | -2.426130000 |
| C | -0.684130000 | -1.084670000 | 0.724950000  |
| C | -0.078910000 | -1.608970000 | 1.882280000  |
| C | -2.014590000 | -1.426160000 | 0.443930000  |
| C | -0.786730000 | -2.462650000 | 2.723550000  |
| H | 0.934140000  | -1.297140000 | 2.159580000  |
| C | -2.726020000 | -2.268120000 | 1.299400000  |
| H | -2.501240000 | -1.004430000 | -0.440330000 |
| C | -2.107620000 | -2.808320000 | 2.432600000  |
| H | -0.301290000 | -2.861410000 | 3.625420000  |
| H | -2.660640000 | -3.486810000 | 3.091170000  |
| C | 2.073010000  | 1.171350000  | 0.613400000  |
| C | 1.215000000  | 2.208470000  | 1.011160000  |
| C | 3.441220000  | 1.223530000  | 0.913910000  |
| C | 1.737860000  | 3.314750000  | 1.675910000  |
| H | 0.150460000  | 2.079570000  | 0.798480000  |
| C | 3.947300000  | 2.325740000  | 1.601920000  |
| H | 4.100080000  | 0.387840000  | 0.655460000  |
| C | 3.093230000  | 3.378080000  | 1.966390000  |
| H | 1.074760000  | 4.129340000  | 1.981400000  |
| H | 3.503080000  | 4.243560000  | 2.501680000  |
| C | 5.269370000  | -0.900380000 | -3.100330000 |

|   |              |              |              |
|---|--------------|--------------|--------------|
| H | 6.242640000  | -1.305820000 | -2.783330000 |
| H | 5.054380000  | -1.230090000 | -4.127290000 |
| H | 5.319150000  | 0.199880000  | -3.083270000 |
| C | -4.162020000 | -2.589430000 | 1.024620000  |
| H | -4.323350000 | -3.678590000 | 1.070800000  |
| H | -4.792980000 | -2.101280000 | 1.785230000  |
| H | -4.459580000 | -2.223990000 | 0.029390000  |
| C | 5.396800000  | 2.390490000  | 1.970280000  |
| H | 5.845920000  | 3.303870000  | 1.552290000  |
| H | 5.493630000  | 2.409910000  | 3.066430000  |
| H | 5.937820000  | 1.515020000  | 1.580140000  |
| H | 0.077480000  | 2.291250000  | -4.059170000 |
| C | -1.251640000 | -2.168730000 | -4.396750000 |
| H | -2.323910000 | -2.019240000 | -4.594190000 |
| H | -0.715760000 | -2.261440000 | -5.353280000 |
| H | -1.120410000 | -3.099760000 | -3.824420000 |

### Coord\_10

|   |              |              |              |
|---|--------------|--------------|--------------|
| C | 0.000000000  | 0.000000000  | 0.000000000  |
| C | 1.440880000  | 0.000000000  | 0.000000000  |
| C | 0.096430000  | 0.000000000  | -1.526270000 |
| C | -0.215290000 | -1.147310000 | -2.294090000 |
| C | 0.246920000  | 1.233800000  | -2.171810000 |
| C | -0.456700000 | -1.018470000 | -3.666740000 |
| H | -0.291680000 | -2.122350000 | -1.807350000 |
| C | 0.044000000  | 1.342610000  | -3.549840000 |
| H | 0.507650000  | 2.128140000  | -1.592290000 |
| C | -0.326280000 | 0.220490000  | -4.292410000 |
| H | -0.513630000 | 0.315610000  | -5.368940000 |
| C | 2.367170000  | -1.019310000 | -0.566710000 |
| C | 2.230570000  | -2.357960000 | -0.180350000 |
| C | 3.343650000  | -0.637370000 | -1.507450000 |
| C | 3.101510000  | -3.312020000 | -0.713360000 |
| H | 1.459300000  | -2.650070000 | 0.532810000  |
| C | 4.217730000  | -1.601200000 | -2.023440000 |
| H | 3.391510000  | 0.395710000  | -1.866240000 |
| C | 4.097930000  | -2.937070000 | -1.619480000 |
| H | 2.990620000  | -4.362530000 | -0.427450000 |
| H | 4.780950000  | -3.692980000 | -2.025200000 |
| C | -0.669120000 | -1.172380000 | 0.588720000  |
| C | -0.168840000 | -1.693300000 | 1.797420000  |
| C | -1.930580000 | -1.596060000 | 0.150910000  |
| C | -0.906940000 | -2.619810000 | 2.528060000  |
| H | 0.777870000  | -1.320020000 | 2.204460000  |
| C | -2.671370000 | -2.511740000 | 0.897960000  |
| H | -2.345920000 | -1.177580000 | -0.770390000 |
| C | -2.147770000 | -3.046480000 | 2.080200000  |
| H | -0.502030000 | -3.013300000 | 3.471370000  |
| H | -2.721200000 | -3.783590000 | 2.652760000  |

|   |              |              |              |
|---|--------------|--------------|--------------|
| C | 2.062960000  | 1.244060000  | 0.469460000  |
| C | 1.175090000  | 2.262930000  | 0.849540000  |
| C | 3.442780000  | 1.387230000  | 0.677120000  |
| C | 1.676110000  | 3.440550000  | 1.396880000  |
| H | 0.109650000  | 2.056690000  | 0.717450000  |
| C | 3.926870000  | 2.561460000  | 1.249710000  |
| H | 4.129450000  | 0.566730000  | 0.443600000  |
| C | 3.041380000  | 3.592670000  | 1.592370000  |
| H | 0.990080000  | 4.240790000  | 1.687850000  |
| H | 3.435850000  | 4.514780000  | 2.037350000  |
| C | 5.283450000  | -1.202660000 | -2.994970000 |
| H | 6.255790000  | -1.603870000 | -2.669030000 |
| H | 5.038620000  | -1.604770000 | -3.988870000 |
| H | 5.355920000  | -0.105540000 | -3.062780000 |
| C | -4.044060000 | -2.915750000 | 0.457740000  |
| H | -4.164290000 | -4.008610000 | 0.534110000  |
| H | -4.787300000 | -2.427460000 | 1.109220000  |
| H | -4.226910000 | -2.605960000 | -0.583090000 |
| C | 5.389200000  | 2.725430000  | 1.526400000  |
| H | 5.751200000  | 3.662470000  | 1.077810000  |
| H | 5.549710000  | 2.760250000  | 2.614580000  |
| H | 5.962240000  | 1.883860000  | 1.108330000  |
| H | 0.166580000  | 2.311050000  | -4.045550000 |
| C | -0.863060000 | -2.216590000 | -4.472670000 |
| H | -1.924140000 | -2.117820000 | -4.745970000 |
| H | -0.256180000 | -2.282290000 | -5.387920000 |
| H | -0.728510000 | -3.140890000 | -3.890430000 |

S<sub>0</sub>\_S<sub>1</sub>S<sub>0</sub>-pyr (C2)

Coord\_1

|   |              |              |              |
|---|--------------|--------------|--------------|
| C | 0.000000000  | 0.000000000  | 0.000000000  |
| C | 1.357180000  | 0.000000000  | 0.000000000  |
| C | -0.799570000 | 0.000000000  | -1.247810000 |
| C | -1.883800000 | -0.860940000 | -1.373810000 |
| C | -0.475230000 | 0.896680000  | -2.274830000 |
| C | -2.650610000 | -0.846140000 | -2.550830000 |
| H | -2.145660000 | -1.544010000 | -0.559690000 |
| C | -1.246900000 | 0.905130000  | -3.442410000 |
| H | 0.384810000  | 1.562700000  | -2.178590000 |
| C | -2.321480000 | 0.046030000  | -3.580670000 |
| H | -2.924180000 | 0.061090000  | -4.498640000 |
| C | 2.155780000  | -0.132230000 | -1.231860000 |
| C | 1.885010000  | -1.155580000 | -2.149720000 |
| C | 3.233470000  | 0.752640000  | -1.452740000 |
| C | 2.659530000  | -1.268420000 | -3.278340000 |
| H | 1.052660000  | -1.838990000 | -1.969230000 |

|   |              |              |              |
|---|--------------|--------------|--------------|
| C | 3.994110000  | 0.637180000  | -2.591190000 |
| H | 3.455360000  | 1.520270000  | -0.703410000 |
| C | 3.712780000  | -0.372350000 | -3.517670000 |
| H | 2.453210000  | -2.059170000 | -4.011900000 |
| H | 4.314140000  | -0.465840000 | -4.428960000 |
| C | -0.801240000 | 0.010890000  | 1.240310000  |
| C | -0.515750000 | -0.893380000 | 2.272650000  |
| C | -1.882950000 | 0.909200000  | 1.361310000  |
| C | -1.295120000 | -0.886200000 | 3.427630000  |
| H | 0.326860000  | -1.582080000 | 2.178080000  |
| C | -2.654300000 | 0.913610000  | 2.529300000  |
| H | -2.117080000 | 1.592540000  | 0.538950000  |
| C | -2.362080000 | 0.014900000  | 3.563750000  |
| H | -1.074400000 | -1.590440000 | 4.239150000  |
| H | -2.968200000 | 0.009910000  | 4.475800000  |
| C | 2.149940000  | 0.144810000  | 1.244230000  |
| C | 1.876350000  | 1.203730000  | 2.119880000  |
| C | 3.171500000  | -0.760860000 | 1.529530000  |
| C | 2.632740000  | 1.344810000  | 3.286460000  |
| H | 1.066440000  | 1.903700000  | 1.898930000  |
| C | 3.921480000  | -0.615170000 | 2.707450000  |
| H | 3.389600000  | -1.582220000 | 0.838860000  |
| C | 3.646460000  | 0.444190000  | 3.582480000  |
| H | 2.423310000  | 2.178660000  | 3.968100000  |
| H | 4.236290000  | 0.559180000  | 4.498820000  |
| C | 5.154310000  | 1.563520000  | -2.836390000 |
| H | 6.087070000  | 1.043120000  | -2.577270000 |
| H | 5.182260000  | 1.864650000  | -3.894260000 |
| H | 5.062710000  | 2.468180000  | -2.215690000 |
| C | -3.813090000 | 1.850250000  | 2.659520000  |
| H | -4.728440000 | 1.337530000  | 2.324520000  |
| H | -3.937550000 | 2.161500000  | 3.708290000  |
| H | -3.656940000 | 2.746450000  | 2.040060000  |
| C | 5.031930000  | -1.567530000 | 3.013260000  |
| H | 5.969450000  | -1.170720000 | 2.592380000  |
| H | 5.150500000  | -1.684760000 | 4.101850000  |
| H | 4.830480000  | -2.553910000 | 2.568690000  |
| H | -0.991050000 | 1.600170000  | -4.251570000 |
| C | -3.833050000 | -1.748200000 | -2.688200000 |
| H | -4.737000000 | -1.217110000 | -2.344910000 |
| H | -3.970710000 | -2.044100000 | -3.740610000 |
| H | -3.701480000 | -2.654790000 | -2.076910000 |

S<sub>0</sub>-S<sub>1</sub>S<sub>0</sub>(C2)

Coord\_1

|   |              |             |              |
|---|--------------|-------------|--------------|
| C | 0.000000000  | 0.000000000 | 0.000000000  |
| C | 1.357180000  | 0.000000000 | 0.000000000  |
| C | -0.799570000 | 0.000000000 | -1.247810000 |

|   |              |              |              |
|---|--------------|--------------|--------------|
| C | -1.883800000 | -0.860940000 | -1.373810000 |
| C | -0.475230000 | 0.896680000  | -2.274830000 |
| C | -2.650610000 | -0.846140000 | -2.550830000 |
| H | -2.145660000 | -1.544010000 | -0.559690000 |
| C | -1.246900000 | 0.905130000  | -3.442410000 |
| H | 0.384810000  | 1.562700000  | -2.178590000 |
| C | -2.321480000 | 0.046030000  | -3.580670000 |
| H | -2.924180000 | 0.061090000  | -4.498640000 |
| C | 2.155780000  | -0.132230000 | -1.231860000 |
| C | 1.885010000  | -1.155580000 | -2.149720000 |
| C | 3.233470000  | 0.752640000  | -1.452740000 |
| C | 2.659530000  | -1.268420000 | -3.278340000 |
| H | 1.052660000  | -1.838990000 | -1.969230000 |
| C | 3.994110000  | 0.637180000  | -2.591190000 |
| H | 3.455360000  | 1.520270000  | -0.703410000 |
| C | 3.712780000  | -0.372350000 | -3.517670000 |
| H | 2.453210000  | -2.059170000 | -4.011900000 |
| H | 4.314140000  | -0.465840000 | -4.428960000 |
| C | -0.801240000 | 0.010890000  | 1.240310000  |
| C | -0.515750000 | -0.893380000 | 2.272650000  |
| C | -1.882950000 | 0.909200000  | 1.361310000  |
| C | -1.295120000 | -0.886200000 | 3.427630000  |
| H | 0.326860000  | -1.582080000 | 2.178080000  |
| C | -2.654300000 | 0.913610000  | 2.529300000  |
| H | -2.117080000 | 1.592540000  | 0.538950000  |
| C | -2.362080000 | 0.014900000  | 3.563750000  |
| H | -1.074400000 | -1.590440000 | 4.239150000  |
| H | -2.968200000 | 0.009910000  | 4.475800000  |
| C | 2.149940000  | 0.144810000  | 1.244230000  |
| C | 1.876350000  | 1.203730000  | 2.119880000  |
| C | 3.171500000  | -0.760860000 | 1.529530000  |
| C | 2.632740000  | 1.344810000  | 3.286460000  |
| H | 1.066440000  | 1.903700000  | 1.898930000  |
| C | 3.921480000  | -0.615170000 | 2.707450000  |
| H | 3.389600000  | -1.582220000 | 0.838860000  |
| C | 3.646460000  | 0.444190000  | 3.582480000  |
| H | 2.423310000  | 2.178660000  | 3.968100000  |
| H | 4.236290000  | 0.559180000  | 4.498820000  |
| C | 5.154310000  | 1.563520000  | -2.836390000 |
| H | 6.087070000  | 1.043120000  | -2.577270000 |
| H | 5.182260000  | 1.864650000  | -3.894260000 |
| H | 5.062710000  | 2.468180000  | -2.215690000 |
| C | -3.813090000 | 1.850250000  | 2.659520000  |
| H | -4.728440000 | 1.337530000  | 2.324520000  |
| H | -3.937550000 | 2.161500000  | 3.708290000  |
| H | -3.656940000 | 2.746450000  | 2.040060000  |
| C | 5.031930000  | -1.567530000 | 3.013260000  |
| H | 5.969450000  | -1.170720000 | 2.592380000  |
| H | 5.150500000  | -1.684760000 | 4.101850000  |
| H | 4.830480000  | -2.553910000 | 2.568690000  |



|   |              |              |              |
|---|--------------|--------------|--------------|
| H | -0.991050000 | 1.600170000  | -4.251570000 |
| C | -3.833050000 | -1.748200000 | -2.688200000 |
| H | -4.737000000 | -1.217110000 | -2.344910000 |
| H | -3.970710000 | -2.044100000 | -3.740610000 |
| H | -3.701480000 | -2.654790000 | -2.076910000 |

Coord\_2

|   |              |              |              |
|---|--------------|--------------|--------------|
| C | 0.000000000  | 0.000000000  | 0.000000000  |
| C | 1.366470000  | 0.000000000  | 0.000000000  |
| C | -0.779430000 | 0.000000000  | -1.258620000 |
| C | -1.915770000 | -0.794220000 | -1.378120000 |
| C | -0.365580000 | 0.821790000  | -2.316130000 |
| C | -2.645480000 | -0.785160000 | -2.577030000 |
| H | -2.241730000 | -1.424110000 | -0.544340000 |
| C | -1.103370000 | 0.829210000  | -3.504410000 |
| H | 0.538430000  | 1.426790000  | -2.217850000 |
| C | -2.230270000 | 0.037950000  | -3.635950000 |
| H | -2.805210000 | 0.049130000  | -4.571440000 |
| C | 2.152450000  | -0.430140000 | -1.170160000 |
| C | 1.738760000  | -1.528970000 | -1.936090000 |
| C | 3.333640000  | 0.264050000  | -1.505890000 |
| C | 2.481130000  | -1.908530000 | -3.030090000 |
| H | 0.820190000  | -2.058490000 | -1.673050000 |
| C | 4.064770000  | -0.113370000 | -2.609180000 |
| H | 3.658890000  | 1.099180000  | -0.876300000 |
| C | 3.647710000  | -1.200720000 | -3.384150000 |
| H | 2.161360000  | -2.761900000 | -3.643190000 |
| H | 4.226280000  | -1.503150000 | -4.264250000 |
| C | -0.816350000 | 0.029400000  | 1.232030000  |
| C | -0.546670000 | -0.867230000 | 2.275050000  |
| C | -1.888250000 | 0.941060000  | 1.336540000  |
| C | -1.337320000 | -0.843400000 | 3.422670000  |
| H | 0.289780000  | -1.564770000 | 2.193890000  |
| C | -2.672290000 | 0.959980000  | 2.495900000  |
| H | -2.102470000 | 1.627270000  | 0.511080000  |
| C | -2.398510000 | 0.066200000  | 3.539600000  |
| H | -1.127620000 | -1.539640000 | 4.243560000  |
| H | -3.014020000 | 0.074230000  | 4.445440000  |
| C | 2.071770000  | 0.308540000  | 1.272810000  |
| C | 1.781410000  | 1.500360000  | 1.949760000  |
| C | 3.045530000  | -0.563870000 | 1.765100000  |
| C | 2.472850000  | 1.814050000  | 3.122910000  |
| H | 1.009200000  | 2.174380000  | 1.568660000  |
| C | 3.734740000  | -0.242420000 | 2.944630000  |
| H | 3.273150000  | -1.492660000 | 1.232110000  |
| C | 3.442090000  | 0.952920000  | 3.620750000  |
| H | 2.248730000  | 2.750440000  | 3.648520000  |
| H | 3.983060000  | 1.204620000  | 4.540030000  |
| C | 5.330250000  | 0.612220000  | -2.975100000 |

|   |              |              |              |
|---|--------------|--------------|--------------|
| H | 6.193820000  | -0.005640000 | -2.689970000 |
| H | 5.356410000  | 0.802170000  | -4.058750000 |
| H | 5.388280000  | 1.576700000  | -2.447270000 |
| C | -3.823450000 | 1.908290000  | 2.608820000  |
| H | -4.749060000 | 1.387390000  | 2.317380000  |
| H | -3.922030000 | 2.266190000  | 3.645250000  |
| H | -3.676700000 | 2.775300000  | 1.946920000  |
| C | 4.796890000  | -1.156200000 | 3.466260000  |
| H | 5.771760000  | -0.836280000 | 3.065820000  |
| H | 4.831530000  | -1.117620000 | 4.566160000  |
| H | 4.604790000  | -2.193300000 | 3.152300000  |
| H | -0.779310000 | 1.466570000  | -4.335750000 |
| C | -3.876470000 | -1.620550000 | -2.713820000 |
| H | -4.762040000 | -1.005320000 | -2.482510000 |
| H | -3.965840000 | -2.003580000 | -3.742920000 |
| H | -3.845630000 | -2.473090000 | -2.017420000 |

### Coord\_3

|   |              |              |              |
|---|--------------|--------------|--------------|
| C | 0.000000000  | 0.000000000  | 0.000000000  |
| C | 1.375750000  | 0.000000000  | 0.000000000  |
| C | -0.759150000 | 0.000000000  | -1.269110000 |
| C | -1.943510000 | -0.723560000 | -1.386440000 |
| C | -0.260630000 | 0.739450000  | -2.351050000 |
| C | -2.636450000 | -0.723360000 | -2.605520000 |
| H | -2.330530000 | -1.295640000 | -0.537090000 |
| C | -0.964380000 | 0.742720000  | -3.558820000 |
| H | 0.682470000  | 1.280710000  | -2.246590000 |
| C | -2.139170000 | 0.023070000  | -3.687920000 |
| H | -2.686570000 | 0.027720000  | -4.639670000 |
| C | 2.149040000  | -0.705760000 | -1.036970000 |
| C | 1.615920000  | -1.843100000 | -1.661190000 |
| C | 3.416310000  | -0.219120000 | -1.416000000 |
| C | 2.330680000  | -2.469860000 | -2.658180000 |
| H | 0.626410000  | -2.206880000 | -1.373510000 |
| C | 4.123220000  | -0.840840000 | -2.423120000 |
| H | 3.828250000  | 0.655080000  | -0.900900000 |
| C | 3.592530000  | -1.970440000 | -3.055110000 |
| H | 1.915740000  | -3.355600000 | -3.158270000 |
| H | 4.152410000  | -2.467060000 | -3.855490000 |
| C | -0.831380000 | 0.047650000  | 1.223290000  |
| C | -0.577480000 | -0.841180000 | 2.276720000  |
| C | -1.893420000 | 0.972140000  | 1.311270000  |
| C | -1.379340000 | -0.800970000 | 3.416620000  |
| H | 0.252790000  | -1.547180000 | 2.209020000  |
| C | -2.690120000 | 1.005270000  | 2.461640000  |
| H | -2.087700000 | 1.661000000  | 0.483030000  |
| C | -2.434770000 | 0.116590000  | 3.514300000  |
| H | -1.180630000 | -1.489070000 | 4.246660000  |
| H | -3.059640000 | 0.137410000  | 4.413630000  |

|   |              |              |              |
|---|--------------|--------------|--------------|
| C | 1.989480000  | 0.479020000  | 1.273480000  |
| C | 1.691050000  | 1.767450000  | 1.736070000  |
| C | 2.906250000  | -0.323410000 | 1.961780000  |
| C | 2.317770000  | 2.252710000  | 2.886870000  |
| H | 0.963550000  | 2.387460000  | 1.203850000  |
| C | 3.535120000  | 0.171510000  | 3.114020000  |
| H | 3.136430000  | -1.330160000 | 1.599420000  |
| C | 3.234140000  | 1.465700000  | 3.573980000  |
| H | 2.085760000  | 3.263260000  | 3.244350000  |
| H | 3.726680000  | 1.852640000  | 4.473460000  |
| C | 5.476790000  | -0.333010000 | -2.834550000 |
| H | 6.248390000  | -1.032600000 | -2.481210000 |
| H | 5.530040000  | -0.252380000 | -3.931010000 |
| H | 5.665610000  | 0.660300000  | -2.398680000 |
| C | -3.833660000 | 1.964740000  | 2.557190000  |
| H | -4.768820000 | 1.438110000  | 2.309800000  |
| H | -3.906060000 | 2.368190000  | 3.578820000  |
| H | -3.697240000 | 2.801010000  | 1.854700000  |
| C | 4.539810000  | -0.666080000 | 3.839240000  |
| H | 5.547110000  | -0.411050000 | 3.474650000  |
| H | 4.490640000  | -0.473240000 | 4.922060000  |
| H | 4.354950000  | -1.735880000 | 3.659550000  |
| H | -0.575820000 | 1.316930000  | -4.407800000 |
| C | -3.911990000 | -1.489180000 | -2.745470000 |
| H | -4.765930000 | -0.801460000 | -2.630140000 |
| H | -3.964020000 | -1.961630000 | -3.739190000 |
| H | -3.980850000 | -2.272390000 | -1.974450000 |

#### Coord\_4

|   |              |              |              |
|---|--------------|--------------|--------------|
| C | 0.000000000  | 0.000000000  | 0.000000000  |
| C | 1.385040000  | 0.000000000  | 0.000000000  |
| C | -0.738730000 | 0.000000000  | -1.279270000 |
| C | -1.966630000 | -0.649390000 | -1.398690000 |
| C | -0.161220000 | 0.650300000  | -2.379470000 |
| C | -2.623500000 | -0.661010000 | -2.636060000 |
| H | -2.411190000 | -1.159400000 | -0.537900000 |
| C | -0.831140000 | 0.646370000  | -3.605350000 |
| H | 0.815830000  | 1.125660000  | -2.264900000 |
| C | -2.049060000 | 0.001650000  | -3.736150000 |
| H | -2.569460000 | -0.002780000 | -4.702770000 |
| C | 2.145560000  | -0.942090000 | -0.839510000 |
| C | 1.520620000  | -2.093780000 | -1.342150000 |
| C | 3.479400000  | -0.654860000 | -1.188050000 |
| C | 2.214230000  | -2.935180000 | -2.187330000 |
| H | 0.477340000  | -2.300570000 | -1.089230000 |
| C | 4.168690000  | -1.490300000 | -2.044650000 |
| H | 3.958720000  | 0.238590000  | -0.774700000 |
| C | 3.550080000  | -2.638120000 | -2.551620000 |
| H | 1.725640000  | -3.833070000 | -2.590150000 |

|   |              |              |              |
|---|--------------|--------------|--------------|
| H | 4.096300000  | -3.303900000 | -3.229160000 |
| C | -0.846330000 | 0.065640000  | 1.214090000  |
| C | -0.608160000 | -0.815240000 | 2.277660000  |
| C | -1.898480000 | 1.002430000  | 1.285540000  |
| C | -1.421180000 | -0.758930000 | 3.409500000  |
| H | 0.215900000  | -1.529340000 | 2.223460000  |
| C | -2.707820000 | 1.049480000  | 2.426550000  |
| H | -2.072770000 | 1.693720000  | 0.454820000  |
| C | -2.470870000 | 0.166050000  | 3.487880000  |
| H | -1.233420000 | -1.438770000 | 4.248450000  |
| H | -3.105060000 | 0.199430000  | 4.380420000  |
| C | 1.903520000  | 0.651000000  | 1.245190000  |
| C | 1.605230000  | 1.998820000  | 1.485190000  |
| C | 2.754670000  | -0.048140000 | 2.111960000  |
| C | 2.167740000  | 2.649760000  | 2.586250000  |
| H | 0.928930000  | 2.539630000  | 0.815750000  |
| C | 3.323830000  | 0.613240000  | 3.209760000  |
| H | 2.980750000  | -1.102590000 | 1.927050000  |
| C | 3.023500000  | 1.967750000  | 3.444290000  |
| H | 1.934250000  | 3.705380000  | 2.769280000  |
| H | 3.468220000  | 2.484680000  | 4.302590000  |
| C | 5.591070000  | -1.191220000 | -2.424390000 |
| H | 6.254780000  | -1.943000000 | -1.971850000 |
| H | 5.699160000  | -1.220690000 | -3.519620000 |
| H | 5.884770000  | -0.191720000 | -2.067770000 |
| C | -3.843730000 | 2.019610000  | 2.504670000  |
| H | -4.787690000 | 1.489660000  | 2.301670000  |
| H | -3.889730000 | 2.467370000  | 3.509080000  |
| H | -3.718550000 | 2.823680000  | 1.763510000  |
| C | 4.262520000  | -0.114210000 | 4.119830000  |
| H | 5.296910000  | 0.090670000  | 3.803220000  |
| H | 4.130220000  | 0.226010000  | 5.158330000  |
| H | 4.083130000  | -1.198950000 | 4.075290000  |
| H | -0.382380000 | 1.152430000  | -4.467360000 |
| C | -3.939360000 | -1.354710000 | -2.782810000 |
| H | -4.749600000 | -0.607580000 | -2.785670000 |
| H | -3.965920000 | -1.916690000 | -3.729660000 |
| H | -4.104710000 | -2.054260000 | -1.948680000 |

### Coord\_5

|   |              |              |              |
|---|--------------|--------------|--------------|
| C | 0.000000000  | -1.016210000 | 0.000000000  |
| C | 1.394320000  | 0.540990000  | 0.000000000  |
| C | -0.718180000 | 0.962860000  | -1.289100000 |
| C | -1.984780000 | -0.025950000 | -1.414790000 |
| C | -0.068120000 | -0.041820000 | -2.401380000 |
| C | -2.606610000 | -1.124320000 | -2.668460000 |
| H | -2.482910000 | -2.281170000 | -0.546680000 |
| C | -0.704820000 | -1.003570000 | -3.643790000 |
| H | 0.937510000  | -3.294060000 | -2.272950000 |

|   |              |              |              |
|---|--------------|--------------|--------------|
| C | -1.960790000 | -2.360010000 | -3.780310000 |
| H | -2.455080000 | -2.011270000 | -4.760260000 |
| C | 2.142010000  | -0.100420000 | -0.589000000 |
| C | 1.456100000  | -3.166950000 | -0.992740000 |
| C | 3.521210000  | -4.195780000 | -0.839920000 |
| C | 2.136600000  | -3.968170000 | -1.640820000 |
| H | 0.377800000  | 0.083350000  | -0.828040000 |
| C | 4.200540000  | -0.789430000 | -1.500380000 |
| H | 4.046530000  | 1.031930000  | -0.513060000 |
| C | 3.522580000  | -0.717310000 | -1.903060000 |
| H | 1.598410000  | -1.511260000 | -1.964620000 |
| H | 4.060810000  | 1.092580000  | -2.421700000 |
| C | -0.861200000 | 1.725450000  | 1.204460000  |
| C | -0.638700000 | 0.214560000  | 2.277870000  |
| C | -1.903410000 | -1.388770000 | 1.259350000  |
| C | -1.462830000 | 0.260240000  | 3.401320000  |
| H | 0.179110000  | 0.819120000  | 2.237210000  |
| C | -2.725370000 | 2.189740000  | 2.390670000  |
| H | -2.057730000 | 0.251970000  | 0.426490000  |
| C | -2.506800000 | 2.996140000  | 3.460370000  |
| H | -1.285970000 | 2.629820000  | 4.248950000  |
| H | -3.150280000 | 1.068680000  | 4.345810000  |
| C | 1.814330000  | -0.820360000 | 1.187880000  |
| C | 1.523790000  | 2.445360000  | 1.204230000  |
| C | 2.591920000  | 4.068220000  | 2.209990000  |
| C | 2.022730000  | 3.083740000  | 2.230420000  |
| H | 0.904570000  | -1.886180000 | 0.415550000  |
| C | 3.102120000  | -2.653480000 | 3.228630000  |
| H | 2.807660000  | -2.026630000 | 2.203450000  |
| C | 2.810860000  | -0.890870000 | 3.236230000  |
| H | 1.793710000  | 2.072880000  | 2.238260000  |
| H | 3.208470000  | 1.542010000  | 4.033930000  |
| C | 5.670720000  | 2.563610000  | -1.778320000 |
| H | 6.218170000  | 2.843430000  | -1.210140000 |
| H | 5.858490000  | 0.480530000  | -2.854240000 |
| H | 6.037640000  | 0.651990000  | -1.482870000 |
| C | -3.853670000 | 0.956320000  | 2.451300000  |
| H | -4.805640000 | -0.602080000 | 2.292920000  |
| H | -3.873090000 | 0.974420000  | 3.436180000  |
| H | -3.740640000 | -1.217710000 | 1.673430000  |
| C | 3.966960000  | -0.425430000 | 4.299300000  |
| H | 5.022700000  | -1.867120000 | 4.039070000  |
| H | 3.752760000  | -1.820560000 | 5.268390000  |
| H | 3.791620000  | -1.016210000 | 4.388230000  |
| H | -0.200730000 | 0.540990000  | -4.514230000 |
| C | -3.958330000 | 0.962860000  | -2.825470000 |
| H | -4.714280000 | -0.025950000 | -2.946960000 |
| H | -3.971940000 | -0.041820000 | -3.714730000 |
| H | -4.214860000 | -1.124320000 | -1.940530000 |

## Coord\_6

|   |             |             |             |
|---|-------------|-------------|-------------|
| C | 0.00000000  | 0.00000000  | 0.00000000  |
| C | 1.40361000  | 0.00000000  | 0.00000000  |
| C | -0.69750000 | 0.00000000  | -1.29861000 |
| C | -1.99762000 | -0.49224000 | -1.43459000 |
| C | 0.01794000  | 0.45438000  | -2.41683000 |
| C | -2.58582000 | -0.53560000 | -2.70249000 |
| H | -2.54493000 | -0.86693000 | -0.56322000 |
| C | -0.58655000 | 0.42750000  | -3.67406000 |
| H | 1.04662000  | 0.79362000  | -2.27103000 |
| C | -1.87522000 | -0.05925000 | -3.82012000 |
| H | -2.34461000 | -0.08874000 | -4.81177000 |
| C | 2.13839000  | -1.24075000 | -0.30000000 |
| C | 1.42463000  | -2.40714000 | -0.62263000 |
| C | 3.54054000  | -1.23221000 | -0.40123000 |
| C | 2.10118000  | -3.54008000 | -1.03912000 |
| H | 0.33117000  | -2.40440000 | -0.58661000 |
| C | 4.21821000  | -2.36187000 | -0.83030000 |
| H | 4.08901000  | -0.31937000 | -0.14822000 |
| C | 3.51151000  | -3.52758000 | -1.14539000 |
| H | 1.53920000  | -4.44827000 | -1.29870000 |
| H | 4.04782000  | -4.42347000 | -1.47754000 |
| C | -0.87599000 | 0.10077000  | 1.19439000  |
| C | -0.66910000 | -0.76378000 | 2.27737000  |
| C | -1.90824000 | 1.06062000  | 1.23275000  |
| C | -1.50427000 | -0.67615000 | 3.39209000  |
| H | 0.14245000  | -1.49298000 | 2.25027000  |
| C | -2.74278000 | 1.13457000  | 2.35401000  |
| H | -2.04260000 | 1.75619000  | 0.39806000  |
| C | -2.54257000 | 0.26208000  | 3.43178000  |
| H | -1.33828000 | -1.33912000 | 4.24817000  |
| H | -3.19528000 | 0.31983000  | 4.30985000  |
| C | 1.72238000  | 0.97805000  | 1.10252000  |
| C | 1.44640000  | 2.33690000  | 0.90070000  |
| C | 2.41920000  | 0.56606000  | 2.25239000  |
| C | 1.88249000  | 3.28494000  | 1.82978000  |
| H | 0.88954000  | 2.65905000  | 0.01393000  |
| C | 2.87126000  | 1.52356000  | 3.17013000  |
| H | 2.61896000  | -0.49596000 | 2.41971000  |
| C | 2.59672000  | 2.88620000  | 2.95648000  |
| H | 1.66328000  | 4.34642000  | 1.66675000  |
| H | 2.94796000  | 3.63476000  | 3.67658000  |
| C | 5.71386000  | -2.35377000 | -0.95206000 |
| H | 6.14449000  | -3.09961000 | -0.26621000 |
| H | 6.00160000  | -2.60222000 | -1.98577000 |
| H | 6.11825000  | -1.36058000 | -0.70161000 |
| C | -3.86350000 | 2.12454000  | 2.39712000  |
| H | -4.82265000 | 1.59510000  | 2.28344000  |
| H | -3.85620000 | 2.65680000  | 3.36021000  |

|   |              |              |              |
|---|--------------|--------------|--------------|
| H | -3.763530000 | 2.860380000  | 1.584580000  |
| C | 3.655130000  | 1.098220000  | 4.372810000  |
| H | 4.726200000  | 1.254090000  | 4.173340000  |
| H | 3.360790000  | 1.693380000  | 5.250400000  |
| H | 3.482830000  | 0.033710000  | 4.591270000  |
| H | -0.032510000 | 0.784370000  | -4.548370000 |
| C | -3.968740000 | -1.078750000 | -2.873070000 |
| H | -4.661480000 | -0.256420000 | -3.111880000 |
| H | -3.982210000 | -1.811280000 | -3.695010000 |
| H | -4.309090000 | -1.573390000 | -1.950180000 |

### Coord\_7

|   |              |              |              |
|---|--------------|--------------|--------------|
| C | 0.000000000  | 0.000000000  | 0.000000000  |
| C | 1.412900000  | 0.000000000  | 0.000000000  |
| C | -0.676700000 | 0.000000000  | -1.307780000 |
| C | -2.004860000 | -0.410180000 | -1.457920000 |
| C | 0.096290000  | 0.349180000  | -2.425930000 |
| C | -2.561160000 | -0.472970000 | -2.737920000 |
| H | -2.596550000 | -0.712470000 | -0.587290000 |
| C | -0.477380000 | 0.306940000  | -3.696160000 |
| H | 1.142370000  | 0.619280000  | -2.259520000 |
| C | -1.793150000 | -0.097680000 | -3.855390000 |
| H | -2.239160000 | -0.142730000 | -4.857030000 |
| C | 2.134690000  | -1.283590000 | 0.010380000  |
| C | 1.427450000  | -2.472840000 | -0.238000000 |
| C | 3.536700000  | -1.317880000 | 0.089140000  |
| C | 2.109710000  | -3.668090000 | -0.400210000 |
| H | 0.339300000  | -2.446700000 | -0.352590000 |
| C | 4.221230000  | -2.512400000 | -0.085000000 |
| H | 4.084620000  | -0.388730000 | 0.274110000  |
| C | 3.517530000  | -3.698780000 | -0.319660000 |
| H | 1.550730000  | -4.592860000 | -0.602100000 |
| H | 4.058060000  | -4.643270000 | -0.447280000 |
| C | -0.890690000 | 0.117880000  | 1.183880000  |
| C | -0.699360000 | -0.738320000 | 2.276160000  |
| C | -1.912980000 | 1.088510000  | 1.205740000  |
| C | -1.545510000 | -0.635470000 | 3.381830000  |
| H | 0.105920000  | -1.474510000 | 2.262620000  |
| C | -2.760070000 | 1.175420000  | 2.316600000  |
| H | -2.027400000 | 1.785950000  | 0.369580000  |
| C | -2.578160000 | 0.308600000  | 3.402140000  |
| H | -1.390340000 | -1.289850000 | 4.246130000  |
| H | -3.240070000 | 0.378150000  | 4.272570000  |
| C | 1.628160000  | 1.122740000  | 0.991090000  |
| C | 1.372630000  | 2.438410000  | 0.582210000  |
| C | 2.237850000  | 0.882910000  | 2.237980000  |
| C | 1.746560000  | 3.511340000  | 1.395230000  |
| H | 0.882710000  | 2.630170000  | -0.379310000 |
| C | 2.632520000  | 1.963930000  | 3.036400000  |

|   |              |              |              |
|---|--------------|--------------|--------------|
| H | 2.416650000  | -0.143220000 | 2.569940000  |
| C | 2.381460000  | 3.279630000  | 2.613520000  |
| H | 1.541800000  | 4.537630000  | 1.070100000  |
| H | 2.686990000  | 4.125000000  | 3.241640000  |
| C | 5.719130000  | -2.548540000 | -0.018940000 |
| H | 6.039990000  | -3.240880000 | 0.775190000  |
| H | 6.121170000  | -2.893960000 | -0.984670000 |
| H | 6.123060000  | -1.546490000 | 0.194440000  |
| C | -3.873220000 | 2.174580000  | 2.342160000  |
| H | -4.838690000 | 1.648890000  | 2.273150000  |
| H | -3.839140000 | 2.746830000  | 3.281300000  |
| H | -3.787200000 | 2.874640000  | 1.497020000  |
| C | 3.329160000  | 1.718620000  | 4.339470000  |
| H | 4.409230000  | 1.876990000  | 4.201010000  |
| H | 2.956890000  | 2.413350000  | 5.107210000  |
| H | 3.159310000  | 0.686840000  | 4.681590000  |
| H | 0.120740000  | 0.583910000  | -4.569870000 |
| C | -3.970430000 | -0.938390000 | -2.925190000 |
| H | -4.592930000 | -0.101650000 | -3.278340000 |
| H | -3.996590000 | -1.747570000 | -3.671240000 |
| H | -4.385400000 | -1.315070000 | -1.977560000 |

#### Coord\_8

|   |              |              |              |
|---|--------------|--------------|--------------|
| C | 0.000000000  | 0.000000000  | 0.000000000  |
| C | 1.422180000  | 0.000000000  | 0.000000000  |
| C | -0.655780000 | 0.000000000  | -1.316620000 |
| C | -2.006240000 | -0.326430000 | -1.484580000 |
| C | 0.166310000  | 0.240270000  | -2.428860000 |
| C | -2.532670000 | -0.410650000 | -2.774540000 |
| H | -2.637140000 | -0.553780000 | -0.618560000 |
| C | -0.378280000 | 0.180420000  | -3.710190000 |
| H | 1.224080000  | 0.441190000  | -2.238910000 |
| C | -1.715360000 | -0.140590000 | -3.885990000 |
| H | -2.139810000 | -0.202860000 | -4.895880000 |
| C | 2.130930000  | -1.249400000 | 0.323570000  |
| C | 1.464640000  | -2.476840000 | 0.156660000  |
| C | 3.509490000  | -1.250470000 | 0.586650000  |
| C | 2.162220000  | -3.672280000 | 0.258670000  |
| H | 0.402460000  | -2.490110000 | -0.108610000 |
| C | 4.209220000  | -2.448040000 | 0.678030000  |
| H | 4.033030000  | -0.296320000 | 0.700170000  |
| C | 3.540420000  | -3.668080000 | 0.529260000  |
| H | 1.633100000  | -4.625870000 | 0.118890000  |
| H | 4.091110000  | -4.611530000 | 0.613620000  |
| C | -0.905300000 | 0.134680000  | 1.172960000  |
| C | -0.729450000 | -0.713050000 | 2.274240000  |
| C | -1.917620000 | 1.115590000  | 1.178340000  |
| C | -1.586530000 | -0.595310000 | 3.370540000  |
| H | 0.069540000  | -1.455890000 | 2.274280000  |



|   |              |              |              |
|---|--------------|--------------|--------------|
| C | -2.777230000 | 1.215120000  | 2.278480000  |
| H | -2.012160000 | 1.814740000  | 0.341070000  |
| C | -2.613570000 | 0.354080000  | 3.371470000  |
| H | -1.442130000 | -1.241000000 | 4.242830000  |
| H | -3.284650000 | 0.435170000  | 4.233990000  |
| C | 1.532170000  | 1.248580000  | 0.856480000  |
| C | 1.301960000  | 2.493700000  | 0.256290000  |
| C | 2.049270000  | 1.191370000  | 2.167890000  |
| C | 1.614300000  | 3.672590000  | 0.937820000  |
| H | 0.882810000  | 2.547550000  | -0.755560000 |
| C | 2.387200000  | 2.376650000  | 2.832120000  |
| H | 2.202910000  | 0.223360000  | 2.651400000  |
| C | 2.165300000  | 3.616860000  | 2.217180000  |
| H | 1.427860000  | 4.642210000  | 0.462950000  |
| H | 2.425670000  | 4.544120000  | 2.741790000  |
| C | 5.685750000  | -2.448550000 | 0.936410000  |
| H | 5.910850000  | -3.063080000 | 1.822660000  |
| H | 6.209330000  | -2.869200000 | 0.062910000  |
| H | 6.051110000  | -1.424000000 | 1.108840000  |
| C | -3.882850000 | 2.222990000  | 2.286480000  |
| H | -4.853760000 | 1.703340000  | 2.261980000  |
| H | -3.821970000 | 2.833620000  | 3.199590000  |
| H | -3.811660000 | 2.886320000  | 1.410840000  |
| C | 2.991220000  | 2.322020000  | 4.202260000  |
| H | 4.073800000  | 2.500340000  | 4.121090000  |
| H | 2.543690000  | 3.093680000  | 4.846130000  |
| H | 2.823680000  | 1.336050000  | 4.660660000  |
| H | 0.257600000  | 0.374780000  | -4.578980000 |
| C | -3.963300000 | -0.797160000 | -2.981420000 |
| H | -4.510580000 | 0.038170000  | -3.444360000 |
| H | -4.014630000 | -1.674470000 | -3.644280000 |
| H | -4.441980000 | -1.048110000 | -2.022330000 |

### Coord\_9

|   |              |              |              |
|---|--------------|--------------|--------------|
| C | 0.000000000  | 0.000000000  | 0.000000000  |
| C | 1.431470000  | 0.000000000  | 0.000000000  |
| C | -0.634750000 | 0.000000000  | -1.325130000 |
| C | -2.001530000 | -0.241450000 | -1.514360000 |
| C | 0.227470000  | 0.128530000  | -2.425870000 |
| C | -2.500420000 | -0.348800000 | -2.812120000 |
| H | -2.666150000 | -0.391830000 | -0.656660000 |
| C | -0.290130000 | 0.049150000  | -3.716360000 |
| H | 1.291210000  | 0.260750000  | -2.209750000 |
| C | -1.642550000 | -0.187250000 | -3.911870000 |
| H | -2.047540000 | -0.268100000 | -4.928270000 |
| C | 2.127100000  | -1.139430000 | 0.620610000  |
| C | 1.535160000  | -2.414590000 | 0.556160000  |
| C | 3.459260000  | -1.033960000 | 1.045480000  |
| C | 2.256980000  | -3.545790000 | 0.918390000  |

|   |              |              |              |
|---|--------------|--------------|--------------|
| H | 0.519250000  | -2.526630000 | 0.162380000  |
| C | 4.181890000  | -2.170380000 | 1.398830000  |
| H | 3.935120000  | -0.049230000 | 1.074790000  |
| C | 3.579060000  | -3.432400000 | 1.353920000  |
| H | 1.783760000  | -4.536450000 | 0.856030000  |
| H | 4.145300000  | -4.323650000 | 1.646260000  |
| C | -0.919820000 | 0.151160000  | 1.161630000  |
| C | -0.759390000 | -0.688010000 | 2.271620000  |
| C | -1.922190000 | 1.141850000  | 1.150590000  |
| C | -1.627320000 | -0.555690000 | 3.358250000  |
| H | 0.033320000  | -1.437140000 | 2.285220000  |
| C | -2.794270000 | 1.253670000  | 2.239670000  |
| H | -1.996900000 | 1.842560000  | 0.312570000  |
| C | -2.648810000 | 0.398510000  | 3.339810000  |
| H | -1.493640000 | -1.192600000 | 4.238290000  |
| H | -3.329000000 | 0.490870000  | 4.194150000  |
| C | 1.434920000  | 1.351560000  | 0.702410000  |
| C | 1.233780000  | 2.503380000  | -0.069920000 |
| C | 1.854950000  | 1.480840000  | 2.045490000  |
| C | 1.484930000  | 3.767830000  | 0.468370000  |
| H | 0.888450000  | 2.416710000  | -1.107590000 |
| C | 2.136620000  | 2.749800000  | 2.564260000  |
| H | 1.980060000  | 0.589320000  | 2.664580000  |
| C | 1.948380000  | 3.891070000  | 1.778310000  |
| H | 1.319820000  | 4.662880000  | -0.141190000 |
| H | 2.163950000  | 4.884330000  | 2.190730000  |
| C | 5.613500000  | -2.058080000 | 1.825790000  |
| H | 5.762750000  | -2.578070000 | 2.785960000  |
| H | 6.258040000  | -2.521530000 | 1.061340000  |
| H | 5.904040000  | -1.002050000 | 1.941780000  |
| C | -3.892400000 | 2.269760000  | 2.230110000  |
| H | -4.867820000 | 1.758370000  | 2.249840000  |
| H | -3.804750000 | 2.917070000  | 3.115190000  |
| H | -3.836900000 | 2.895550000  | 1.326110000  |
| C | 2.643580000  | 2.889930000  | 3.967860000  |
| H | 3.722010000  | 3.104160000  | 3.936500000  |
| H | 2.123870000  | 3.713980000  | 4.478540000  |
| H | 2.478640000  | 1.961210000  | 4.534000000  |
| H | 0.376810000  | 0.158810000  | -4.576110000 |
| C | -3.947290000 | -0.655560000 | -3.041310000 |
| H | -4.416470000 | 0.162670000  | -3.608060000 |
| H | -4.035620000 | -1.590610000 | -3.615100000 |
| H | -4.477300000 | -0.775170000 | -2.083920000 |

Coord\_10

|   |              |              |              |
|---|--------------|--------------|--------------|
| C | 0.000000000  | 0.000000000  | 0.000000000  |
| C | 1.440750000  | 0.000000000  | 0.000000000  |
| C | -0.613610000 | 0.000000000  | -1.333300000 |
| C | -1.990560000 | -0.155750000 | -1.547010000 |

|   |              |              |              |
|---|--------------|--------------|--------------|
| C | 0.279310000  | 0.014890000  | -2.417280000 |
| C | -2.464490000 | -0.287570000 | -2.850460000 |
| H | -2.683110000 | -0.227590000 | -0.701160000 |
| C | -0.213710000 | -0.085630000 | -3.714970000 |
| H | 1.343340000  | 0.079350000  | -2.172680000 |
| C | -1.575370000 | -0.236840000 | -3.933070000 |
| H | -1.963230000 | -0.337310000 | -4.954230000 |
| C | 2.123200000  | -0.959530000 | 0.883320000  |
| C | 1.636820000  | -2.279190000 | 0.952050000  |
| C | 3.386860000  | -0.686130000 | 1.423100000  |
| C | 2.390490000  | -3.281920000 | 1.555420000  |
| H | 0.686670000  | -2.538200000 | 0.471700000  |
| C | 4.139020000  | -1.697700000 | 2.019630000  |
| H | 3.793010000  | 0.326830000  | 1.348490000  |
| C | 3.631460000  | -2.998950000 | 2.105710000  |
| H | 1.997560000  | -4.308460000 | 1.593750000  |
| H | 4.217830000  | -3.787680000 | 2.589900000  |
| C | -0.934250000 | 0.167300000  | 1.149890000  |
| C | -0.789150000 | -0.663210000 | 2.268300000  |
| C | -1.926680000 | 1.167290000  | 1.122500000  |
| C | -1.667880000 | -0.516630000 | 3.344970000  |
| H | -0.002720000 | -1.418280000 | 2.295460000  |
| C | -2.811190000 | 1.291040000  | 2.200200000  |
| H | -1.981670000 | 1.869430000  | 0.284080000  |
| C | -2.683860000 | 0.441860000  | 3.307170000  |
| H | -1.544860000 | -1.144690000 | 4.232520000  |
| H | -3.373120000 | 0.545220000  | 4.153070000  |
| C | 1.336940000  | 1.428440000  | 0.533320000  |
| C | 1.167410000  | 2.469100000  | -0.389740000 |
| C | 1.656420000  | 1.741760000  | 1.876180000  |
| C | 1.357580000  | 3.797870000  | -0.002830000 |
| H | 0.898140000  | 2.243970000  | -1.429660000 |
| C | 1.882090000  | 3.073140000  | 2.241800000  |
| H | 1.750580000  | 0.940970000  | 2.613020000  |
| C | 1.730730000  | 4.097470000  | 1.308410000  |
| H | 1.215870000  | 4.604260000  | -0.730240000 |
| H | 1.901680000  | 5.140330000  | 1.602750000  |
| C | 5.502730000  | -1.407730000 | 2.565670000  |
| H | 5.600550000  | -1.821590000 | 3.582800000  |
| H | 6.259560000  | -1.874160000 | 1.913930000  |
| H | 5.686030000  | -0.322260000 | 2.602110000  |
| C | -3.901890000 | 2.314890000  | 2.173090000  |
| H | -4.880860000 | 1.813930000  | 2.236650000  |
| H | -3.787550000 | 2.997100000  | 3.028250000  |
| H | -3.862910000 | 2.902440000  | 1.242900000  |
| C | 2.288540000  | 3.405760000  | 3.646280000  |
| H | 3.356120000  | 3.669670000  | 3.653980000  |
| H | 1.700100000  | 4.256720000  | 4.019350000  |
| H | 2.126980000  | 2.544100000  | 4.310790000  |
| H | 0.477280000  | -0.062060000 | -4.561780000 |

|   |              |              |              |
|---|--------------|--------------|--------------|
| C | -3.922370000 | -0.514060000 | -3.104430000 |
| H | -4.312780000 | 0.271850000  | -3.767730000 |
| H | -4.058530000 | -1.494770000 | -3.584730000 |
| H | -4.490140000 | -0.498990000 | -2.161520000 |

TPE-4oM

S<sub>0</sub>-S<sub>1</sub>S<sub>0</sub>-cyc(C4C5)-S<sub>0</sub>-final(C4C5)

Coord\_1

|   |              |              |              |
|---|--------------|--------------|--------------|
| C | 0.000000000  | 0.000000000  | 0.000000000  |
| C | 1.363000000  | 0.000000000  | 0.000000000  |
| C | -0.789760000 | 0.000000000  | -1.254080000 |
| C | -1.715610000 | -1.028920000 | -1.525220000 |
| C | -0.654530000 | 1.064840000  | -2.170140000 |
| C | -2.511350000 | -0.968720000 | -2.678500000 |
| C | -1.464390000 | 1.105990000  | -3.316990000 |
| C | -2.393720000 | 0.101020000  | -3.563320000 |
| H | -3.027440000 | 0.145700000  | -4.457450000 |
| C | 2.170680000  | -0.205010000 | -1.216140000 |
| C | 1.784440000  | -1.146560000 | -2.181910000 |
| C | 3.362600000  | 0.513950000  | -1.395350000 |
| C | 2.571940000  | -1.354700000 | -3.299100000 |
| H | 0.851070000  | -1.703560000 | -2.056320000 |
| C | 4.135290000  | 0.304630000  | -2.521670000 |
| H | 3.673490000  | 1.242630000  | -0.639700000 |
| C | 3.749590000  | -0.631160000 | -3.481050000 |
| H | 2.271630000  | -2.096340000 | -4.049830000 |
| H | 4.368240000  | -0.797160000 | -4.367940000 |
| C | -0.780850000 | 0.005490000  | 1.260730000  |
| C | -0.641110000 | -1.053520000 | 2.182740000  |
| C | -1.707510000 | 1.033850000  | 1.528270000  |
| C | -1.444240000 | -1.086340000 | 3.334320000  |
| C | -2.499770000 | 0.978410000  | 2.683810000  |
| C | -2.374370000 | -0.082820000 | 3.577680000  |
| H | -1.333780000 | -1.912850000 | 4.046220000  |
| H | -3.004200000 | -0.122780000 | 4.475070000  |
| C | 2.145150000  | 0.219970000  | 1.237400000  |
| C | 1.798560000  | 1.265310000  | 2.105620000  |
| C | 3.254650000  | -0.586170000 | 1.516190000  |
| C | 2.558410000  | 1.487290000  | 3.250490000  |
| H | 0.927800000  | 1.891420000  | 1.892140000  |
| C | 3.998360000  | -0.363710000 | 2.670960000  |
| H | 3.531030000  | -1.389890000 | 0.827760000  |
| C | 3.652340000  | 0.675920000  | 3.535380000  |
| H | 2.290700000  | 2.303100000  | 3.930450000  |

|   |              |              |              |
|---|--------------|--------------|--------------|
| H | 4.246060000  | 0.852930000  | 4.440180000  |
| H | -1.361560000 | 1.938060000  | -4.022460000 |
| H | -3.226370000 | 1.774800000  | 2.883240000  |
| H | -3.234070000 | -1.767510000 | -2.880830000 |
| H | 5.061950000  | 0.875190000  | -2.664540000 |
| H | 4.859730000  | -1.000530000 | 2.899760000  |
| C | 0.355440000  | 2.153970000  | -1.998040000 |
| H | 1.254570000  | 1.889830000  | -2.573100000 |
| H | -0.046730000 | 3.107600000  | -2.378340000 |
| H | 0.633380000  | 2.279550000  | -0.941590000 |
| C | -1.855700000 | -2.208280000 | -0.618670000 |
| H | -2.275800000 | -1.887940000 | 0.342680000  |
| H | -2.520990000 | -2.964480000 | -1.068310000 |
| H | -0.866990000 | -2.666620000 | -0.449840000 |
| C | 0.357590000  | -2.153200000 | 2.008300000  |
| H | 1.274950000  | -1.883850000 | 2.549980000  |
| H | -0.041440000 | -3.095500000 | 2.420190000  |
| H | 0.603330000  | -2.304840000 | 0.946970000  |
| C | -1.853730000 | 2.211370000  | 0.618100000  |
| H | -0.867230000 | 2.673610000  | 0.450020000  |
| H | -2.270750000 | 1.889830000  | -0.343750000 |
| H | -2.521370000 | 2.967390000  | 1.065180000  |

## Coord\_2

|   |              |              |              |
|---|--------------|--------------|--------------|
| C | 0.000000000  | 0.000000000  | 0.000000000  |
| C | 1.371440000  | 0.000000000  | 0.000000000  |
| C | -0.766820000 | 0.000000000  | -1.261250000 |
| C | -1.727470000 | -1.000490000 | -1.538430000 |
| C | -0.572050000 | 1.043580000  | -2.202630000 |
| C | -2.474190000 | -0.944950000 | -2.721300000 |
| C | -1.355250000 | 1.080740000  | -3.371670000 |
| C | -2.286570000 | 0.084600000  | -3.635790000 |
| H | -2.880910000 | 0.112040000  | -4.555450000 |
| C | 2.175660000  | -0.190470000 | -1.210090000 |
| C | 1.741470000  | -1.074190000 | -2.220000000 |
| C | 3.379610000  | 0.517760000  | -1.374040000 |
| C | 2.509460000  | -1.238980000 | -3.366750000 |
| H | 0.830990000  | -1.672030000 | -2.057610000 |
| C | 4.134090000  | 0.353780000  | -2.516840000 |
| H | 3.709450000  | 1.206210000  | -0.587550000 |
| C | 3.701190000  | -0.541820000 | -3.525010000 |
| H | 2.179250000  | -1.934480000 | -4.147040000 |
| H | 4.307520000  | -0.684060000 | -4.426180000 |
| C | -0.751910000 | -0.102280000 | 1.274940000  |
| C | -0.595270000 | -1.229630000 | 2.110090000  |
| C | -1.666630000 | 0.905720000  | 1.645240000  |
| C | -1.363880000 | -1.345420000 | 3.278920000  |
| C | -2.425860000 | 0.767410000  | 2.815380000  |
| C | -2.279180000 | -0.357470000 | 3.625290000  |

|   |              |              |              |
|---|--------------|--------------|--------------|
| H | -1.238700000 | -2.223460000 | 3.923980000  |
| H | -2.881130000 | -0.460920000 | 4.536460000  |
| C | 2.144750000  | 0.198170000  | 1.246340000  |
| C | 1.787380000  | 1.224600000  | 2.131900000  |
| C | 3.253560000  | -0.611460000 | 1.517450000  |
| C | 2.538420000  | 1.426560000  | 3.286850000  |
| H | 0.917040000  | 1.851850000  | 1.921720000  |
| C | 3.987360000  | -0.410000000 | 2.683020000  |
| H | 3.534890000  | -1.402700000 | 0.816750000  |
| C | 3.632230000  | 0.612220000  | 3.563990000  |
| H | 2.263400000  | 2.227990000  | 3.980600000  |
| H | 4.218350000  | 0.772980000  | 4.476830000  |
| H | -1.217390000 | 1.902280000  | -4.085370000 |
| H | -3.142190000 | 1.549180000  | 3.094560000  |
| H | -3.221080000 | -1.722130000 | -2.927100000 |
| H | 5.071360000  | 0.907750000  | -2.643100000 |
| H | 4.847080000  | -1.050430000 | 2.907080000  |
| C | 0.401230000  | 2.153730000  | -1.954770000 |
| H | 1.362400000  | 1.889680000  | -2.419880000 |
| H | 0.031600000  | 3.090490000  | -2.404150000 |
| H | 0.559990000  | 2.311460000  | -0.877710000 |
| C | -1.973570000 | -2.127470000 | -0.588660000 |
| H | -2.602230000 | -1.782280000 | 0.242830000  |
| H | -2.481860000 | -2.959880000 | -1.102220000 |
| H | -1.013460000 | -2.494040000 | -0.189810000 |
| C | 0.387650000  | -2.318690000 | 1.818600000  |
| H | 1.336670000  | -2.083000000 | 2.320790000  |
| H | 0.009330000  | -3.282810000 | 2.198150000  |
| H | 0.570860000  | -2.410270000 | 0.737560000  |
| C | -1.838180000 | 2.142940000  | 0.822790000  |
| H | -0.884500000 | 2.694440000  | 0.779020000  |
| H | -2.149060000 | 1.873290000  | -0.193640000 |
| H | -2.601840000 | 2.801350000  | 1.270590000  |

### Coord\_3

|   |              |              |              |
|---|--------------|--------------|--------------|
| C | 0.000000000  | 0.000000000  | 0.000000000  |
| C | 1.379870000  | 0.000000000  | 0.000000000  |
| C | -0.743840000 | 0.000000000  | -1.268010000 |
| C | -1.738190000 | -0.970560000 | -1.553060000 |
| C | -0.489290000 | 1.019710000  | -2.232660000 |
| C | -2.435480000 | -0.922620000 | -2.763150000 |
| C | -1.245630000 | 1.051860000  | -3.423030000 |
| C | -2.178240000 | 0.064110000  | -3.704390000 |
| H | -2.732910000 | 0.072910000  | -4.647110000 |
| C | 2.180630000  | -0.176090000 | -1.203870000 |
| C | 1.700900000  | -0.997010000 | -2.255750000 |
| C | 3.396430000  | 0.520960000  | -1.352870000 |
| C | 2.451320000  | -1.113730000 | -3.428690000 |
| H | 0.819330000  | -1.642100000 | -2.068310000 |

|   |              |              |              |
|---|--------------|--------------|--------------|
| C | 4.133580000  | 0.403660000  | -2.509450000 |
| H | 3.744640000  | 1.167320000  | -0.537430000 |
| C | 3.656280000  | -0.443540000 | -3.563010000 |
| H | 2.093380000  | -1.760140000 | -4.237060000 |
| H | 4.251480000  | -0.559490000 | -4.477010000 |
| C | -0.722540000 | -0.212290000 | 1.279170000  |
| C | -0.548740000 | -1.400800000 | 2.022120000  |
| C | -1.624980000 | 0.765340000  | 1.750190000  |
| C | -1.282130000 | -1.602640000 | 3.201020000  |
| C | -2.350400000 | 0.541380000  | 2.927960000  |
| C | -2.182130000 | -0.640480000 | 3.648670000  |
| H | -1.141950000 | -2.526770000 | 3.775200000  |
| H | -2.755570000 | -0.809970000 | 4.568140000  |
| C | 2.144320000  | 0.176100000  | 1.254830000  |
| C | 1.776180000  | 1.183330000  | 2.157240000  |
| C | 3.252380000  | -0.637010000 | 1.518230000  |
| C | 2.518380000  | 1.364950000  | 3.321840000  |
| H | 0.906340000  | 1.811790000  | 1.950330000  |
| C | 3.976220000  | -0.456890000 | 2.694130000  |
| H | 3.538650000  | -1.415570000 | 0.805510000  |
| C | 3.612010000  | 0.547640000  | 3.591220000  |
| H | 2.236040000  | 2.151750000  | 4.029020000  |
| H | 4.190470000  | 0.691910000  | 4.511730000  |
| H | -1.072900000 | 1.861940000  | -4.144100000 |
| H | -3.056190000 | 1.300750000  | 3.285360000  |
| H | -3.205840000 | -1.677200000 | -2.973580000 |
| H | 5.081070000  | 0.940230000  | -2.620230000 |
| H | 4.834240000  | -1.100960000 | 2.913370000  |
| C | 0.437550000  | 2.154830000  | -1.918220000 |
| H | 1.448130000  | 1.895970000  | -2.268380000 |
| H | 0.105420000  | 3.071510000  | -2.433750000 |
| H | 0.476660000  | 2.346040000  | -0.835140000 |
| C | -2.089460000 | -2.037600000 | -0.567620000 |
| H | -2.893000000 | -1.684970000 | 0.094320000  |
| H | -2.427680000 | -2.946370000 | -1.090280000 |
| H | -1.205080000 | -2.288900000 | 0.039930000  |
| C | 0.417630000  | -2.467390000 | 1.615100000  |
| H | 1.394690000  | -2.258040000 | 2.074230000  |
| H | 0.063250000  | -3.453500000 | 1.959550000  |
| H | 0.537780000  | -2.496750000 | 0.521430000  |
| C | -1.822810000 | 2.055570000  | 1.020140000  |
| H | -0.916280000 | 2.676920000  | 1.110440000  |
| H | -2.024150000 | 1.854500000  | -0.038880000 |
| H | -2.672570000 | 2.612930000  | 1.449670000  |

Coord\_4

|   |              |             |              |
|---|--------------|-------------|--------------|
| C | 0.000000000  | 0.000000000 | 0.000000000  |
| C | 1.388300000  | 0.000000000 | 0.000000000  |
| C | -0.720850000 | 0.000000000 | -1.274360000 |

|   |              |              |              |
|---|--------------|--------------|--------------|
| C | -1.747660000 | -0.939200000 | -1.569100000 |
| C | -0.406420000 | 0.993240000  | -2.260190000 |
| C | -2.395400000 | -0.901720000 | -2.803950000 |
| C | -1.135790000 | 1.019370000  | -3.470990000 |
| C | -2.069070000 | 0.039620000  | -3.768990000 |
| H | -2.583960000 | 0.028440000  | -4.732250000 |
| C | 2.185580000  | -0.161870000 | -1.197490000 |
| C | 1.662950000  | -0.915230000 | -2.288840000 |
| C | 3.413060000  | 0.523540000  | -1.331870000 |
| C | 2.398030000  | -0.979470000 | -3.484140000 |
| H | 0.815530000  | -1.612600000 | -2.089460000 |
| C | 4.133800000  | 0.454090000  | -2.499460000 |
| H | 3.779040000  | 1.126080000  | -0.489460000 |
| C | 3.615420000  | -0.336930000 | -3.594270000 |
| H | 2.014650000  | -1.573980000 | -4.318880000 |
| H | 4.200830000  | -0.424240000 | -4.519430000 |
| C | -0.692760000 | -0.323550000 | 1.273160000  |
| C | -0.501520000 | -1.565590000 | 1.919150000  |
| C | -1.582580000 | 0.613930000  | 1.841870000  |
| C | -1.199070000 | -1.855840000 | 3.100540000  |
| C | -2.273440000 | 0.302230000  | 3.019950000  |
| C | -2.083310000 | -0.929420000 | 3.646750000  |
| H | -1.043610000 | -2.820260000 | 3.600230000  |
| H | -2.627650000 | -1.166930000 | 4.568700000  |
| C | 2.143850000  | 0.153780000  | 1.262880000  |
| C | 1.764980000  | 1.141500000  | 2.181610000  |
| C | 3.251130000  | -0.662790000 | 1.518510000  |
| C | 2.498260000  | 1.302480000  | 3.355450000  |
| H | 0.895730000  | 1.771300000  | 1.977960000  |
| C | 3.964930000  | -0.504330000 | 2.704260000  |
| H | 3.542320000  | -1.428510000 | 0.794030000  |
| C | 3.591670000  | 0.482230000  | 3.617050000  |
| H | 2.208620000  | 2.074420000  | 4.075690000  |
| H | 4.162450000  | 0.609760000  | 4.544880000  |
| H | -0.928410000 | 1.817100000  | -4.198560000 |
| H | -2.968440000 | 1.031600000  | 3.453300000  |
| H | -3.188440000 | -1.632740000 | -3.020140000 |
| H | 5.091110000  | 0.972550000  | -2.595940000 |
| H | 4.821180000  | -1.152110000 | 2.918600000  |
| C | 0.465390000  | 2.157000000  | -1.889630000 |
| H | 1.512540000  | 1.909050000  | -2.121770000 |
| H | 0.175150000  | 3.050390000  | -2.467790000 |
| H | 0.386010000  | 2.382150000  | -0.814830000 |
| C | -2.202390000 | -1.939070000 | -0.555740000 |
| H | -3.140780000 | -1.602030000 | -0.090520000 |
| H | -2.369530000 | -2.917350000 | -1.032080000 |
| H | -1.434340000 | -2.053260000 | 0.225650000  |
| C | 0.447550000  | -2.598150000 | 1.399310000  |
| H | 1.448890000  | -2.407340000 | 1.812900000  |
| H | 0.120200000  | -3.605940000 | 1.705510000  |



|   |              |              |             |
|---|--------------|--------------|-------------|
| H | 0.504380000  | -2.564200000 | 0.300280000 |
| C | -1.807630000 | 1.950030000  | 1.208450000 |
| H | -0.962020000 | 2.619530000  | 1.439090000 |
| H | -1.897660000 | 1.832450000  | 0.121900000 |
| H | -2.732260000 | 2.406770000  | 1.600470000 |

Coord\_5

|   |              |              |              |
|---|--------------|--------------|--------------|
| C | 0.000000000  | 0.000000000  | 0.000000000  |
| C | 1.396740000  | 0.000000000  | 0.000000000  |
| C | -0.697830000 | 0.000000000  | -1.280300000 |
| C | -1.755780000 | -0.906470000 | -1.586510000 |
| C | -0.323620000 | 0.964200000  | -2.285160000 |
| C | -2.354110000 | -0.882240000 | -2.843590000 |
| C | -1.025990000 | 0.983330000  | -3.515480000 |
| C | -1.959380000 | 0.011180000  | -3.829460000 |
| H | -2.434580000 | -0.021260000 | -4.810760000 |
| C | 2.190520000  | -0.147800000 | -1.190960000 |
| C | 1.627840000  | -0.829050000 | -2.318950000 |
| C | 3.429490000  | 0.525530000  | -1.311050000 |
| C | 2.350080000  | -0.836810000 | -3.532330000 |
| H | 0.819060000  | -1.582090000 | -2.121790000 |
| C | 4.134770000  | 0.504920000  | -2.486820000 |
| H | 3.812590000  | 1.082590000  | -0.443730000 |
| C | 3.579100000  | -0.222720000 | -3.618060000 |
| H | 1.943650000  | -1.376760000 | -4.391570000 |
| H | 4.156210000  | -0.279230000 | -4.552470000 |
| C | -0.662580000 | -0.435060000 | 1.256720000  |
| C | -0.453650000 | -1.722590000 | 1.801650000  |
| C | -1.539460000 | 0.452860000  | 1.919210000  |
| C | -1.114760000 | -2.102820000 | 2.977640000  |
| C | -2.195060000 | 0.052040000  | 3.089940000  |
| C | -1.982830000 | -1.221760000 | 3.618750000  |
| H | -0.943770000 | -3.101420000 | 3.399710000  |
| H | -2.497510000 | -1.528660000 | 4.537070000  |
| C | 2.143350000  | 0.131210000  | 1.270460000  |
| C | 1.753760000  | 1.099150000  | 2.205020000  |
| C | 3.249800000  | -0.688810000 | 1.518290000  |
| C | 2.478090000  | 1.239200000  | 3.387650000  |
| H | 0.885190000  | 1.730370000  | 2.004610000  |
| C | 3.953510000  | -0.552330000 | 2.713410000  |
| H | 3.545880000  | -1.441500000 | 0.782300000  |
| C | 3.571210000  | 0.416010000  | 3.641450000  |
| H | 2.181150000  | 1.996050000  | 4.120590000  |
| H | 4.134270000  | 0.526560000  | 4.576230000  |
| H | -0.784230000 | 1.767820000  | -4.248680000 |
| H | -2.879010000 | 0.744090000  | 3.596260000  |
| H | -3.169000000 | -1.588740000 | -3.066670000 |
| H | 5.101490000  | 1.004640000  | -2.570210000 |
| H | 4.807930000  | -1.203840000 | 2.922750000  |

|   |              |              |              |
|---|--------------|--------------|--------------|
| C | 0.485830000  | 2.159790000  | -1.870040000 |
| H | 1.556740000  | 1.929000000  | -1.983080000 |
| H | 0.241260000  | 3.026760000  | -2.506840000 |
| H | 0.290690000  | 2.418480000  | -0.817310000 |
| C | -2.311390000 | -1.832330000 | -0.553150000 |
| H | -3.341490000 | -1.538040000 | -0.297530000 |
| H | -2.317560000 | -2.865500000 | -0.931060000 |
| H | -1.691380000 | -1.791610000 | 0.356000000  |
| C | 0.477420000  | -2.709920000 | 1.172810000  |
| H | 1.499160000  | -2.529570000 | 1.539610000  |
| H | 0.180050000  | -3.738550000 | 1.437360000  |
| H | 0.470950000  | -2.612660000 | 0.075750000  |
| C | -1.792620000 | 1.827240000  | 1.386080000  |
| H | -1.020910000 | 2.521530000  | 1.759410000  |
| H | -1.771290000 | 1.805600000  | 0.289890000  |
| H | -2.779790000 | 2.187760000  | 1.721870000  |

### Coord\_6

|   |              |              |              |
|---|--------------|--------------|--------------|
| C | 0.000000000  | 0.000000000  | 0.000000000  |
| C | 1.405170000  | 0.000000000  | 0.000000000  |
| C | -0.674820000 | 0.000000000  | -1.285840000 |
| C | -1.762430000 | -0.872440000 | -1.605270000 |
| C | -0.241080000 | 0.932620000  | -2.307550000 |
| C | -2.311780000 | -0.864130000 | -2.881980000 |
| C | -0.916510000 | 0.943810000  | -3.556430000 |
| C | -1.849520000 | -0.021120000 | -3.885730000 |
| H | -2.285290000 | -0.076010000 | -4.882520000 |
| C | 2.195430000  | -0.133900000 | -1.184270000 |
| C | 1.595790000  | -0.738740000 | -2.345780000 |
| C | 3.445720000  | 0.526910000  | -1.290430000 |
| C | 2.307940000  | -0.686460000 | -3.572550000 |
| H | 0.829440000  | -1.548870000 | -2.165700000 |
| C | 4.136540000  | 0.555970000  | -2.471510000 |
| H | 3.845260000  | 1.036960000  | -0.400350000 |
| C | 3.547800000  | -0.101720000 | -3.633660000 |
| H | 1.880970000  | -1.169360000 | -4.454210000 |
| H | 4.118220000  | -0.125490000 | -4.575250000 |
| C | -0.632020000 | -0.545780000 | 1.229810000  |
| C | -0.405150000 | -1.870440000 | 1.670220000  |
| C | -1.495650000 | 0.283560000  | 1.981230000  |
| C | -1.029270000 | -2.341390000 | 2.832710000  |
| C | -2.115310000 | -0.206950000 | 3.136780000  |
| C | -1.880790000 | -1.514880000 | 3.564120000  |
| H | -0.842510000 | -3.367790000 | 3.174530000  |
| H | -2.365300000 | -1.891890000 | 4.472540000  |
| C | 2.142820000  | 0.108420000  | 1.277570000  |
| C | 1.742530000  | 1.056300000  | 2.227430000  |
| C | 3.248380000  | -0.715040000 | 1.517550000  |
| C | 2.457850000  | 1.175130000  | 3.418430000  |

|   |              |              |              |
|---|--------------|--------------|--------------|
| H | 0.874740000  | 1.689050000  | 2.030270000  |
| C | 3.941940000  | -0.600840000 | 2.721550000  |
| H | 3.549350000  | -1.454550000 | 0.770330000  |
| C | 3.550640000  | 0.349010000  | 3.664410000  |
| H | 2.153620000  | 1.916680000  | 4.163690000  |
| H | 4.105940000  | 0.442370000  | 4.605750000  |
| H | -0.640680000 | 1.714190000  | -4.294400000 |
| H | -2.788000000 | 0.440770000  | 3.712360000  |
| H | -3.147620000 | -1.545210000 | -3.113040000 |
| H | 5.112200000  | 1.036400000  | -2.543050000 |
| H | 4.794490000  | -1.256130000 | 2.925810000  |
| C | 0.500030000  | 2.162660000  | -1.860320000 |
| H | 1.582160000  | 1.955660000  | -1.855140000 |
| H | 0.304270000  | 3.000170000  | -2.551340000 |
| H | 0.193260000  | 2.453560000  | -0.842700000 |
| C | -2.415520000 | -1.717880000 | -0.559890000 |
| H | -3.494310000 | -1.495590000 | -0.511790000 |
| H | -2.280190000 | -2.783460000 | -0.794260000 |
| H | -1.964830000 | -1.510730000 | 0.422820000  |
| C | 0.507240000  | -2.801830000 | 0.937300000  |
| H | 1.545430000  | -2.623740000 | 1.257240000  |
| H | 0.242650000  | -3.849840000 | 1.156580000  |
| H | 0.437790000  | -2.642330000 | -0.150630000 |
| C | -1.777750000 | 1.688260000  | 1.551470000  |
| H | -1.091950000 | 2.383030000  | 2.065630000  |
| H | -1.646780000 | 1.771950000  | 0.465920000  |
| H | -2.814200000 | 1.960920000  | 1.813580000  |

### Coord\_7

|   |              |              |              |
|---|--------------|--------------|--------------|
| C | 0.000000000  | 0.000000000  | 0.000000000  |
| C | 1.413610000  | 0.000000000  | 0.000000000  |
| C | -0.651800000 | 0.000000000  | -1.290960000 |
| C | -1.767530000 | -0.837180000 | -1.625330000 |
| C | -0.158970000 | 0.898530000  | -2.327310000 |
| C | -2.268590000 | -0.847360000 | -2.919060000 |
| C | -0.807610000 | 0.900880000  | -3.593800000 |
| C | -1.739830000 | -0.057190000 | -3.937710000 |
| H | -2.136600000 | -0.135650000 | -4.947480000 |
| C | 2.200330000  | -0.120170000 | -1.177430000 |
| C | 1.566980000  | -0.644590000 | -2.369040000 |
| C | 3.461750000  | 0.527720000  | -1.270010000 |
| C | 2.272020000  | -0.529190000 | -3.604120000 |
| H | 0.846260000  | -1.511080000 | -2.221190000 |
| C | 4.139120000  | 0.607060000  | -2.453510000 |
| H | 3.877020000  | 0.989310000  | -0.359420000 |
| C | 3.521940000  | 0.025160000  | -3.640460000 |
| H | 1.827110000  | -0.952760000 | -4.505940000 |
| H | 4.087410000  | 0.035820000  | -4.586930000 |
| C | -0.601090000 | -0.654680000 | 1.192460000  |

|   |              |              |              |
|---|--------------|--------------|--------------|
| C | -0.356050000 | -2.007790000 | 1.525620000  |
| C | -1.451180000 | 0.107580000  | 2.027150000  |
| C | -0.942670000 | -2.569400000 | 2.666350000  |
| C | -2.034260000 | -0.472420000 | 3.159510000  |
| C | -1.777280000 | -1.806090000 | 3.482630000  |
| H | -0.739920000 | -3.616960000 | 2.925830000  |
| H | -2.231160000 | -2.253290000 | 4.374720000  |
| C | 2.142250000  | 0.085400000  | 1.284210000  |
| C | 1.731290000  | 1.012970000  | 2.248860000  |
| C | 3.246890000  | -0.741490000 | 1.516280000  |
| C | 2.437560000  | 1.110320000  | 3.447760000  |
| H | 0.864370000  | 1.647360000  | 2.054930000  |
| C | 3.930230000  | -0.649850000 | 2.728660000  |
| H | 3.552720000  | -1.467640000 | 0.758090000  |
| C | 3.529970000  | 0.281280000  | 3.685890000  |
| H | 2.126050000  | 1.836360000  | 4.204960000  |
| H | 4.077460000  | 0.357230000  | 4.633430000  |
| H | -0.498070000 | 1.656300000  | -4.335700000 |
| H | -2.695460000 | 0.124380000  | 3.800030000  |
| H | -3.124400000 | -1.502120000 | -3.159180000 |
| H | 5.123260000  | 1.067770000  | -2.514460000 |
| H | 4.780840000  | -1.308950000 | 2.927740000  |
| C | 0.509200000  | 2.164930000  | -1.861110000 |
| H | 1.590510000  | 1.988550000  | -1.740540000 |
| H | 0.364710000  | 2.970080000  | -2.601650000 |
| H | 0.096190000  | 2.485770000  | -0.890650000 |
| C | -2.513840000 | -1.596270000 | -0.575920000 |
| H | -3.601440000 | -1.474900000 | -0.718660000 |
| H | -2.263510000 | -2.664600000 | -0.631780000 |
| H | -2.242750000 | -1.219250000 | 0.421690000  |
| C | 0.537030000  | -2.873140000 | 0.694540000  |
| H | 1.587620000  | -2.689180000 | 0.968780000  |
| H | 0.307860000  | -3.938410000 | 0.864860000  |
| H | 0.405200000  | -2.653490000 | -0.377400000 |
| C | -1.763010000 | 1.534290000  | 1.703180000  |
| H | -1.173880000 | 2.205120000  | 2.351850000  |
| H | -1.525840000 | 1.729060000  | 0.650370000  |
| H | -2.834730000 | 1.731200000  | 1.876190000  |

### Coord\_8

|   |              |              |              |
|---|--------------|--------------|--------------|
| C | 0.000000000  | 0.000000000  | 0.000000000  |
| C | 1.422040000  | 0.000000000  | 0.000000000  |
| C | -0.628780000 | 0.000000000  | -1.295690000 |
| C | -1.770970000 | -0.800770000 | -1.646650000 |
| C | -0.077480000 | 0.861980000  | -2.344430000 |
| C | -2.224700000 | -0.831860000 | -2.954740000 |
| C | -0.699560000 | 0.854630000  | -3.627560000 |
| C | -1.630650000 | -0.096900000 | -3.985360000 |
| H | -1.989040000 | -0.199980000 | -5.005590000 |

|   |              |              |              |
|---|--------------|--------------|--------------|
| C | 2.205210000  | -0.106600000 | -1.170440000 |
| C | 1.541600000  | -0.546900000 | -2.388440000 |
| C | 3.477580000  | 0.527940000  | -1.249830000 |
| C | 2.242720000  | -0.365880000 | -3.626410000 |
| H | 0.869230000  | -1.466730000 | -2.287860000 |
| C | 4.142530000  | 0.658020000  | -2.432830000 |
| H | 3.907820000  | 0.939770000  | -0.321030000 |
| C | 3.501890000  | 0.156930000  | -3.637870000 |
| H | 1.782570000  | -0.728020000 | -4.545960000 |
| H | 4.064250000  | 0.203450000  | -4.586770000 |
| C | -0.569820000 | -0.760720000 | 1.144820000  |
| C | -0.306370000 | -2.133390000 | 1.368720000  |
| C | -1.406080000 | -0.073450000 | 2.056320000  |
| C | -0.855040000 | -2.784720000 | 2.479410000  |
| C | -1.951980000 | -0.741940000 | 3.157470000  |
| C | -1.672410000 | -2.092680000 | 3.374330000  |
| H | -0.636080000 | -3.846630000 | 2.655020000  |
| H | -2.095220000 | -2.609470000 | 4.243630000  |
| C | 2.141650000  | 0.062180000  | 1.290380000  |
| C | 1.720040000  | 0.969190000  | 2.269270000  |
| C | 3.245310000  | -0.768120000 | 1.514490000  |
| C | 2.417210000  | 1.044790000  | 3.475620000  |
| H | 0.854080000  | 1.605320000  | 2.078600000  |
| C | 3.918390000  | -0.699340000 | 2.734720000  |
| H | 3.556000000  | -1.480770000 | 0.745600000  |
| C | 3.509180000  | 0.212850000  | 3.705890000  |
| H | 2.098440000  | 1.755120000  | 4.244390000  |
| H | 4.048840000  | 0.271180000  | 4.659220000  |
| H | -0.356720000 | 1.594270000  | -4.372550000 |
| H | -2.601500000 | -0.202190000 | 3.857980000  |
| H | -3.099460000 | -1.459460000 | -3.204980000 |
| H | 5.134670000  | 1.098640000  | -2.484460000 |
| H | 4.767000000  | -1.362280000 | 2.928530000  |
| C | 0.514550000  | 2.165810000  | -1.872850000 |
| H | 1.583700000  | 2.026970000  | -1.641520000 |
| H | 0.423120000  | 2.935900000  | -2.657980000 |
| H | 0.001780000  | 2.513440000  | -0.960400000 |
| C | -2.605470000 | -1.468120000 | -0.601160000 |
| H | -3.667640000 | -1.473630000 | -0.904750000 |
| H | -2.270830000 | -2.503740000 | -0.456080000 |
| H | -2.513540000 | -0.927100000 | 0.352180000  |
| C | 0.566800000  | -2.923270000 | 0.446340000  |
| H | 1.625690000  | -2.725560000 | 0.677260000  |
| H | 0.375500000  | -4.002990000 | 0.564050000  |
| H | 0.373470000  | -2.646530000 | -0.603200000 |
| C | -1.748380000 | 1.366650000  | 1.839880000  |
| H | -1.265290000 | 1.989830000  | 2.612270000  |
| H | -1.410190000 | 1.674180000  | 0.843050000  |
| H | -2.840870000 | 1.503370000  | 1.911150000  |

## Coord\_9

|   |             |             |             |
|---|-------------|-------------|-------------|
| C | 0.00000000  | 0.00000000  | 0.00000000  |
| C | 1.43047000  | 0.00000000  | 0.00000000  |
| C | -0.60578000 | 0.00000000  | -1.30001000 |
| C | -1.77267000 | -0.76328000 | -1.66917000 |
| C | 0.00320000  | 0.82302000  | -2.35891000 |
| C | -2.18028000 | -0.81756000 | -2.98899000 |
| C | -0.59264000 | 0.80515000  | -3.65769000 |
| C | -1.52233000 | -0.14015000 | -4.02866000 |
| H | -1.84311000 | -0.26878000 | -5.05686000 |
| C | 2.21007000  | -0.09320000 | -1.16331000 |
| C | 1.51984000  | -0.44602000 | -2.40372000 |
| C | 3.49321000  | 0.52760000  | -1.22989000 |
| C | 2.22037000  | -0.19746000 | -3.63887000 |
| H | 0.89820000  | -1.41380000 | -2.36486000 |
| C | 4.14680000  | 0.70867000  | -2.40945000 |
| H | 3.93762000  | 0.88847000  | -0.28526000 |
| C | 3.48796000  | 0.29254000  | -3.62541000 |
| H | 1.74777000  | -0.49630000 | -4.57353000 |
| H | 4.04916000  | 0.37604000  | -4.57412000 |
| C | -0.53820000 | -0.86289000 | 1.08714000  |
| C | -0.25614000 | -2.24606000 | 1.20052000  |
| C | -1.36037000 | -0.25788000 | 2.06827000  |
| C | -0.76645000 | -2.98531000 | 2.27295000  |
| C | -1.86854000 | -1.01300000 | 3.13022000  |
| C | -1.56628000 | -2.37195000 | 3.23954000  |
| H | -0.53109000 | -4.05462000 | 2.36373000  |
| H | -1.95762000 | -2.95704000 | 4.07963000  |
| C | 2.14102000  | 0.03876000  | 1.29605000  |
| C | 1.70879000  | 0.92499000  | 2.28867000  |
| C | 3.24366000  | -0.79495000 | 1.51216000  |
| C | 2.39680000  | 0.97859000  | 3.50201000  |
| H | 0.84387000  | 1.56296000  | 2.10127000  |
| C | 3.90641000  | -0.74927000 | 2.73973000  |
| H | 3.55918000  | -1.49393000 | 0.73283000  |
| C | 3.48829000  | 0.14375000  | 3.72438000  |
| H | 2.07078000  | 1.67302000  | 4.28196000  |
| H | 4.02008000  | 0.18427000  | 4.68311000  |
| H | -0.21694000 | 1.52821000  | -4.40495000 |
| H | -2.50619000 | -0.53596000 | 3.88522000  |
| H | -3.07290000 | -1.41719000 | -3.25037000 |
| H | 5.14644000  | 1.12894000  | -2.45305000 |
| H | 4.75297000  | -1.41610000 | 2.92817000  |
| C | 0.51726000  | 2.16443000  | -1.89573000 |
| H | 1.56380000  | 2.06994000  | -1.56003000 |
| H | 0.48004000  | 2.89697000  | -2.72043000 |
| H | -0.08791000 | 2.53485000  | -1.05078000 |
| C | -2.68955000 | -1.33408000 | -0.63541000 |
| H | -3.69958000 | -1.48693000 | -1.05890000 |

|   |              |              |              |
|---|--------------|--------------|--------------|
| H | -2.302590000 | -2.297750000 | -0.281080000 |
| H | -2.766830000 | -0.644800000 | 0.217850000  |
| C | 0.596560000  | -2.951790000 | 0.194570000  |
| H | 1.659610000  | -2.732880000 | 0.385710000  |
| H | 0.445400000  | -4.042450000 | 0.256160000  |
| H | 0.342880000  | -2.621900000 | -0.826760000 |
| C | -1.733830000 | 1.186770000  | 1.960360000  |
| H | -1.364560000 | 1.740240000  | 2.841310000  |
| H | -1.301470000 | 1.604330000  | 1.043120000  |
| H | -2.832340000 | 1.281770000  | 1.920730000  |

### Coord\_10

|   |              |              |              |
|---|--------------|--------------|--------------|
| C | 0.000000000  | 0.000000000  | 0.000000000  |
| C | 1.438910000  | 0.000000000  | 0.000000000  |
| C | -0.582800000 | 0.000000000  | -1.303930000 |
| C | -1.772540000 | -0.724780000 | -1.692850000 |
| C | 0.082900000  | 0.781700000  | -2.370740000 |
| C | -2.135490000 | -0.804400000 | -3.021760000 |
| C | -0.487110000 | 0.752550000  | -3.684200000 |
| C | -1.415210000 | -0.186790000 | -4.067580000 |
| H | -1.699320000 | -0.341820000 | -5.101310000 |
| C | 2.214920000  | -0.079960000 | -1.156030000 |
| C | 1.501830000  | -0.342310000 | -2.414650000 |
| C | 3.508620000  | 0.526690000  | -1.210200000 |
| C | 2.205280000  | -0.024950000 | -3.640970000 |
| H | 0.933120000  | -1.350360000 | -2.450900000 |
| C | 4.151940000  | 0.758840000  | -2.383410000 |
| H | 3.966410000  | 0.835540000  | -0.252190000 |
| C | 3.480400000  | 0.430860000  | -3.602660000 |
| H | 1.723100000  | -0.258870000 | -4.588000000 |
| H | 4.042450000  | 0.552160000  | -4.548450000 |
| C | -0.506270000 | -0.960190000 | 1.019780000  |
| C | -0.205400000 | -2.344690000 | 1.022160000  |
| C | -1.314090000 | -0.443980000 | 2.062700000  |
| C | -0.676980000 | -3.169240000 | 2.048240000  |
| C | -1.784010000 | -1.283080000 | 3.077610000  |
| C | -1.458990000 | -2.641230000 | 3.078900000  |
| H | -0.425030000 | -4.238900000 | 2.053850000  |
| H | -1.818530000 | -3.292660000 | 3.883450000  |
| C | 2.140360000  | 0.015150000  | 1.301240000  |
| C | 1.697530000  | 0.880380000  | 2.307050000  |
| C | 3.241930000  | -0.821940000 | 1.509280000  |
| C | 2.376340000  | 0.911750000  | 3.526890000  |
| H | 0.833750000  | 1.520300000  | 2.122930000  |
| C | 3.894290000  | -0.799630000 | 2.743660000  |
| H | 3.562260000  | -1.507130000 | 0.719790000  |
| C | 3.467300000  | 0.074030000  | 3.741330000  |
| H | 2.043080000  | 1.590110000  | 4.317640000  |
| H | 3.991180000  | 0.096540000  | 4.705080000  |

|   |              |              |              |
|---|--------------|--------------|--------------|
| H | -0.079040000 | 1.458240000  | -4.432920000 |
| H | -2.409620000 | -0.873820000 | 3.881100000  |
| H | -3.044820000 | -1.375260000 | -3.295280000 |
| H | 5.158570000  | 1.158600000  | -2.420240000 |
| H | 4.738740000  | -1.470360000 | 2.926620000  |
| C | 0.518480000  | 2.159840000  | -1.929730000 |
| H | 1.532990000  | 2.116270000  | -1.497600000 |
| H | 0.535950000  | 2.852560000  | -2.788950000 |
| H | -0.171050000 | 2.548280000  | -1.160260000 |
| C | -2.765280000 | -1.194850000 | -0.678450000 |
| H | -3.704980000 | -1.507690000 | -1.172840000 |
| H | -2.356420000 | -2.046100000 | -0.121140000 |
| H | -2.994200000 | -0.382670000 | 0.025970000  |
| C | 0.626320000  | -2.958470000 | -0.058870000 |
| H | 1.689380000  | -2.711510000 | 0.097100000  |
| H | 0.517360000  | -4.055840000 | -0.056610000 |
| H | 0.313710000  | -2.580120000 | -1.046920000 |
| C | -1.719350000 | 0.996200000  | 2.063560000  |
| H | -1.469930000 | 1.460410000  | 3.033880000  |
| H | -1.201200000 | 1.516460000  | 1.248990000  |
| H | -2.809140000 | 1.070220000  | 1.907930000  |

#### Coord\_11

|   |              |              |              |
|---|--------------|--------------|--------------|
| C | 0.000000000  | 0.000000000  | 0.000000000  |
| C | 1.442650000  | 0.000000000  | 0.000000000  |
| C | -0.608080000 | 0.000000000  | -1.278110000 |
| C | -1.900260000 | -0.580230000 | -1.584340000 |
| C | 0.113230000  | 0.642240000  | -2.411280000 |
| C | -2.303290000 | -0.722830000 | -2.892560000 |
| C | -0.468400000 | 0.484930000  | -3.728500000 |
| C | -1.543020000 | -0.328310000 | -3.964130000 |
| H | -1.886830000 | -0.566850000 | -4.966540000 |
| C | 2.204700000  | -0.112760000 | -1.155560000 |
| C | 1.489030000  | -0.402060000 | -2.414660000 |
| C | 3.552980000  | 0.371170000  | -1.194920000 |
| C | 2.222340000  | -0.103360000 | -3.640620000 |
| H | 1.001070000  | -1.448830000 | -2.427520000 |
| C | 4.220120000  | 0.545300000  | -2.363970000 |
| H | 4.030920000  | 0.630140000  | -0.234420000 |
| C | 3.519880000  | 0.275820000  | -3.599820000 |
| H | 1.723930000  | -0.281030000 | -4.594400000 |
| H | 4.087210000  | 0.399310000  | -4.539510000 |
| C | -0.531090000 | -0.787560000 | 1.144250000  |
| C | -0.358130000 | -2.187770000 | 1.259190000  |
| C | -1.208010000 | -0.099340000 | 2.178680000  |
| C | -0.837670000 | -2.867370000 | 2.383180000  |
| C | -1.685540000 | -0.794660000 | 3.294190000  |
| C | -1.493880000 | -2.173330000 | 3.402520000  |
| H | -0.692960000 | -3.952490000 | 2.472350000  |



|   |              |              |              |
|---|--------------|--------------|--------------|
| H | -1.859440000 | -2.711630000 | 4.284460000  |
| C | 2.145060000  | 0.078050000  | 1.299510000  |
| C | 1.898730000  | 1.165220000  | 2.147010000  |
| C | 3.055690000  | -0.920110000 | 1.666370000  |
| C | 2.578140000  | 1.253240000  | 3.362730000  |
| H | 1.185060000  | 1.933140000  | 1.843100000  |
| C | 3.712440000  | -0.831010000 | 2.894380000  |
| H | 3.223840000  | -1.773840000 | 1.004450000  |
| C | 3.479060000  | 0.257370000  | 3.734080000  |
| H | 2.398990000  | 2.104090000  | 4.027120000  |
| H | 4.003830000  | 0.326550000  | 4.694720000  |
| H | 0.029980000  | 0.997410000  | -4.571090000 |
| H | -2.209800000 | -0.254690000 | 4.092540000  |
| H | -3.287880000 | -1.176380000 | -3.109970000 |
| H | 5.259080000  | 0.861300000  | -2.393600000 |
| H | 4.408430000  | -1.618270000 | 3.199680000  |
| C | 0.496950000  | 2.077110000  | -2.100910000 |
| H | 1.429370000  | 2.099030000  | -1.512610000 |
| H | 0.658650000  | 2.643540000  | -3.033290000 |
| H | -0.299600000 | 2.563680000  | -1.513560000 |
| C | -2.904330000 | -0.865850000 | -0.513800000 |
| H | -3.892430000 | -1.085850000 | -0.960350000 |
| H | -2.584000000 | -1.730240000 | 0.080600000  |
| H | -3.005760000 | 0.006330000  | 0.147150000  |
| C | 0.334840000  | -2.967280000 | 0.186860000  |
| H | 1.413290000  | -2.740820000 | 0.194700000  |
| H | 0.200600000  | -4.050180000 | 0.345350000  |
| H | -0.077230000 | -2.704120000 | -0.800870000 |
| C | -1.453910000 | 1.372800000  | 2.075380000  |
| H | -0.964890000 | 1.892400000  | 2.916630000  |
| H | -1.056500000 | 1.743840000  | 1.122480000  |
| H | -2.538000000 | 1.571150000  | 2.119010000  |

## Coord\_12

|   |              |              |              |
|---|--------------|--------------|--------------|
| C | 0.000000000  | 0.000000000  | 0.000000000  |
| C | 1.450130000  | 0.000000000  | 0.000000000  |
| C | -0.655950000 | 0.000000000  | -1.225120000 |
| C | -2.080780000 | -0.246510000 | -1.385170000 |
| C | 0.117280000  | 0.331210000  | -2.473600000 |
| C | -2.598580000 | -0.503230000 | -2.626340000 |
| C | -0.544130000 | -0.097110000 | -3.727850000 |
| C | -1.819560000 | -0.551640000 | -3.752820000 |
| H | -2.289660000 | -0.915170000 | -4.669350000 |
| C | 2.184350000  | -0.178360000 | -1.151340000 |
| C | 1.463660000  | -0.522210000 | -2.409700000 |
| C | 3.606450000  | 0.042910000  | -1.163730000 |
| C | 2.257210000  | -0.261340000 | -3.631910000 |
| H | 1.146880000  | -1.626310000 | -2.380260000 |
| C | 4.303320000  | 0.089960000  | -2.325670000 |

|   |              |              |              |
|---|--------------|--------------|--------------|
| H | 4.110890000  | 0.200510000  | -0.199710000 |
| C | 3.585090000  | -0.034800000 | -3.584700000 |
| H | 1.742360000  | -0.320670000 | -4.597500000 |
| H | 4.169470000  | 0.095650000  | -4.507540000 |
| C | -0.579960000 | -0.400420000 | 1.304520000  |
| C | -0.684020000 | -1.764500000 | 1.657840000  |
| C | -0.989510000 | 0.584720000  | 2.228670000  |
| C | -1.197720000 | -2.126960000 | 2.906860000  |
| C | -1.501070000 | 0.204490000  | 3.474250000  |
| C | -1.599500000 | -1.145170000 | 3.814560000  |
| H | -1.285700000 | -3.186650000 | 3.177200000  |
| H | -1.991990000 | -1.435890000 | 4.796000000  |
| C | 2.154440000  | 0.203290000  | 1.286930000  |
| C | 2.384350000  | 1.509940000  | 1.744910000  |
| C | 2.602920000  | -0.895060000 | 2.033950000  |
| C | 3.065560000  | 1.711410000  | 2.943950000  |
| H | 2.037680000  | 2.359020000  | 1.149930000  |
| C | 3.274680000  | -0.681930000 | 3.236280000  |
| H | 2.404380000  | -1.910570000 | 1.681390000  |
| C | 3.507260000  | 0.618110000  | 3.690670000  |
| H | 3.259270000  | 2.728950000  | 3.299540000  |
| H | 4.034960000  | 0.780050000  | 4.637660000  |
| H | 0.038620000  | -0.035710000 | -4.660240000 |
| H | -1.818750000 | 0.970850000  | 4.191330000  |
| H | -3.675500000 | -0.696210000 | -2.748960000 |
| H | 5.385950000  | 0.228550000  | -2.343030000 |
| H | 3.616490000  | -1.535960000 | 3.830510000  |
| C | 0.387180000  | 1.836860000  | -2.500480000 |
| H | 1.126540000  | 2.097100000  | -1.727290000 |
| H | 0.781960000  | 2.140150000  | -3.482480000 |
| H | -0.544000000 | 2.389690000  | -2.302610000 |
| C | -3.033720000 | -0.155480000 | -0.236270000 |
| H | -4.077060000 | -0.172150000 | -0.600840000 |
| H | -2.886100000 | -1.002720000 | 0.445560000  |
| H | -2.870660000 | 0.782030000  | 0.312900000  |
| C | -0.270790000 | -2.830100000 | 0.692070000  |
| H | 0.799650000  | -2.725960000 | 0.456070000  |
| H | -0.446790000 | -3.831350000 | 1.118340000  |
| H | -0.850940000 | -2.732400000 | -0.237260000 |
| C | -0.887140000 | 2.037900000  | 1.888000000  |
| H | -0.021420000 | 2.469470000  | 2.413640000  |
| H | -0.758590000 | 2.162730000  | 0.804760000  |
| H | -1.800040000 | 2.566540000  | 2.207380000  |

### Coord\_13

|   |              |             |              |
|---|--------------|-------------|--------------|
| C | 0.000000000  | 0.000000000 | 0.000000000  |
| C | 1.455740000  | 0.000000000 | 0.000000000  |
| C | -0.689470000 | 0.000000000 | -1.184320000 |
| C | -2.146190000 | 0.027940000 | -1.261750000 |

|   |              |              |              |
|---|--------------|--------------|--------------|
| C | 0.068950000  | 0.080120000  | -2.496600000 |
| C | -2.774250000 | -0.292530000 | -2.429100000 |
| C | -0.696330000 | -0.542010000 | -3.634480000 |
| C | -2.031490000 | -0.690280000 | -3.599190000 |
| H | -2.589150000 | -1.120610000 | -4.440010000 |
| C | 2.169150000  | -0.227410000 | -1.145320000 |
| C | 1.444860000  | -0.612720000 | -2.401570000 |
| C | 3.613020000  | -0.213040000 | -1.138750000 |
| C | 2.283950000  | -0.380460000 | -3.618290000 |
| H | 1.262440000  | -1.741210000 | -2.345000000 |
| C | 4.315030000  | -0.267090000 | -2.295950000 |
| H | 4.124850000  | -0.131960000 | -0.172810000 |
| C | 3.622570000  | -0.266450000 | -3.565580000 |
| H | 1.770890000  | -0.347640000 | -4.590470000 |
| H | 4.225240000  | -0.129480000 | -4.471520000 |
| C | -0.615900000 | -0.092830000 | 1.341880000  |
| C | -0.936280000 | -1.365570000 | 1.859940000  |
| C | -0.831860000 | 1.055260000  | 2.129490000  |
| C | -1.491510000 | -1.477530000 | 3.138460000  |
| C | -1.385630000 | 0.924440000  | 3.408310000  |
| C | -1.710800000 | -0.335600000 | 3.910420000  |
| H | -1.760630000 | -2.463760000 | 3.534330000  |
| H | -2.136570000 | -0.430420000 | 4.916370000  |
| C | 2.161490000  | 0.296180000  | 1.269580000  |
| C | 2.769580000  | 1.552070000  | 1.441810000  |
| C | 2.243930000  | -0.666340000 | 2.287600000  |
| C | 3.453280000  | 1.837090000  | 2.620760000  |
| H | 2.715330000  | 2.293910000  | 0.638910000  |
| C | 2.929240000  | -0.371640000 | 3.463190000  |
| H | 1.755780000  | -1.636010000 | 2.160190000  |
| C | 3.531180000  | 0.878900000  | 3.635090000  |
| H | 3.941790000  | 2.809210000  | 2.751460000  |
| H | 4.062280000  | 1.108490000  | 4.565460000  |
| H | -0.133890000 | -0.831450000 | -4.532500000 |
| H | -1.554360000 | 1.815820000  | 4.023420000  |
| H | -3.869130000 | -0.279720000 | -2.502380000 |
| H | 5.410530000  | -0.267420000 | -2.305280000 |
| H | 2.992090000  | -1.118870000 | 4.262220000  |
| C | 0.230250000  | 1.577930000  | -2.812670000 |
| H | 0.821450000  | 2.061510000  | -2.021440000 |
| H | 0.744550000  | 1.715240000  | -3.774780000 |
| H | -0.757450000 | 2.057550000  | -2.867540000 |
| C | -3.000240000 | 0.394450000  | -0.089980000 |
| H | -4.047550000 | 0.537580000  | -0.410280000 |
| H | -2.971490000 | -0.401980000 | 0.665290000  |
| H | -2.641240000 | 1.331050000  | 0.357750000  |
| C | -0.721700000 | -2.588720000 | 1.024610000  |
| H | 0.318730000  | -2.617630000 | 0.667470000  |
| H | -0.927920000 | -3.500590000 | 1.608280000  |
| H | -1.394180000 | -2.557690000 | 0.156900000  |

|   |              |             |             |
|---|--------------|-------------|-------------|
| C | -0.458290000 | 2.411800000 | 1.621130000 |
| H | 0.569610000  | 2.632970000 | 1.941990000 |
| H | -0.507440000 | 2.438820000 | 0.523940000 |
| H | -1.137300000 | 3.176230000 | 2.031240000 |

S<sub>0</sub>-S<sub>1</sub>S<sub>0</sub>-cyc(C8C9)-S<sub>0</sub>-final(C8C9)

Coord\_1

|   |              |              |              |
|---|--------------|--------------|--------------|
| C | 0.000000000  | 0.000000000  | 0.000000000  |
| C | 1.363000000  | 0.000000000  | 0.000000000  |
| C | -0.789760000 | 0.000000000  | -1.254080000 |
| C | -1.715610000 | -1.028920000 | -1.525220000 |
| C | -0.654530000 | 1.064840000  | -2.170140000 |
| C | -2.511350000 | -0.968720000 | -2.678500000 |
| C | -1.464390000 | 1.105990000  | -3.316990000 |
| C | -2.393720000 | 0.101020000  | -3.563320000 |
| H | -3.027440000 | 0.145700000  | -4.457450000 |
| C | 2.170680000  | -0.205010000 | -1.216140000 |
| C | 1.784440000  | -1.146560000 | -2.181910000 |
| C | 3.362600000  | 0.513950000  | -1.395350000 |
| C | 2.571940000  | -1.354700000 | -3.299100000 |
| H | 0.851070000  | -1.703560000 | -2.056320000 |
| C | 4.135290000  | 0.304630000  | -2.521670000 |
| H | 3.673490000  | 1.242630000  | -0.639700000 |
| C | 3.749590000  | -0.631160000 | -3.481050000 |
| H | 2.271630000  | -2.096340000 | -4.049830000 |
| H | 4.368240000  | -0.797160000 | -4.367940000 |
| C | -0.780850000 | 0.005490000  | 1.260730000  |
| C | -0.641110000 | -1.053520000 | 2.182740000  |
| C | -1.707510000 | 1.033850000  | 1.528270000  |
| C | -1.444240000 | -1.086340000 | 3.334320000  |
| C | -2.499770000 | 0.978410000  | 2.683810000  |
| C | -2.374370000 | -0.082820000 | 3.577680000  |
| H | -1.333780000 | -1.912850000 | 4.046220000  |
| H | -3.004200000 | -0.122780000 | 4.475070000  |
| C | 2.145150000  | 0.219970000  | 1.237400000  |
| C | 1.798560000  | 1.265310000  | 2.105620000  |
| C | 3.254650000  | -0.586170000 | 1.516190000  |
| C | 2.558410000  | 1.487290000  | 3.250490000  |
| H | 0.927800000  | 1.891420000  | 1.892140000  |
| C | 3.998360000  | -0.363710000 | 2.670960000  |
| H | 3.531030000  | -1.389890000 | 0.827760000  |
| C | 3.652340000  | 0.675920000  | 3.535380000  |
| H | 2.290700000  | 2.303100000  | 3.930450000  |
| H | 4.246060000  | 0.852930000  | 4.440180000  |
| H | -1.361560000 | 1.938060000  | -4.022460000 |
| H | -3.226370000 | 1.774800000  | 2.883240000  |

|   |              |              |              |
|---|--------------|--------------|--------------|
| H | -3.234070000 | -1.767510000 | -2.880830000 |
| H | 5.061950000  | 0.875190000  | -2.664540000 |
| H | 4.859730000  | -1.000530000 | 2.899760000  |
| C | 0.355440000  | 2.153970000  | -1.998040000 |
| H | 1.254570000  | 1.889830000  | -2.573100000 |
| H | -0.046730000 | 3.107600000  | -2.378340000 |
| H | 0.633380000  | 2.279550000  | -0.941590000 |
| C | -1.855700000 | -2.208280000 | -0.618670000 |
| H | -2.275800000 | -1.887940000 | 0.342680000  |
| H | -2.520990000 | -2.964480000 | -1.068310000 |
| H | -0.866990000 | -2.666620000 | -0.449840000 |
| C | 0.357590000  | -2.153200000 | 2.008300000  |
| H | 1.274950000  | -1.883850000 | 2.549980000  |
| H | -0.041440000 | -3.095500000 | 2.420190000  |
| H | 0.603330000  | -2.304840000 | 0.946970000  |
| C | -1.853730000 | 2.211370000  | 0.618100000  |
| H | -0.867230000 | 2.673610000  | 0.450020000  |
| H | -2.270750000 | 1.889830000  | -0.343750000 |
| H | -2.521370000 | 2.967390000  | 1.065180000  |

## Coord\_2

|   |              |              |              |
|---|--------------|--------------|--------------|
| C | 0.000000000  | 0.000000000  | 0.000000000  |
| C | 1.371430000  | 0.000000000  | 0.000000000  |
| C | -0.760030000 | 0.000000000  | -1.273270000 |
| C | -1.673960000 | -1.035980000 | -1.561030000 |
| C | -0.607550000 | 1.058660000  | -2.194750000 |
| C | -2.436350000 | -0.991910000 | -2.736770000 |
| C | -1.382340000 | 1.083540000  | -3.365210000 |
| C | -2.296860000 | 0.068760000  | -3.630230000 |
| H | -2.902380000 | 0.099730000  | -4.544140000 |
| C | 2.167730000  | -0.287400000 | -1.207500000 |
| C | 1.774290000  | -1.298370000 | -2.096440000 |
| C | 3.350860000  | 0.425650000  | -1.452520000 |
| C | 2.550300000  | -1.582370000 | -3.206830000 |
| H | 0.847330000  | -1.850220000 | -1.915970000 |
| C | 4.110930000  | 0.140830000  | -2.572830000 |
| H | 3.663550000  | 1.210710000  | -0.756660000 |
| C | 3.719580000  | -0.865540000 | -3.455270000 |
| H | 2.245710000  | -2.377750000 | -3.897930000 |
| H | 4.328150000  | -1.091230000 | -4.336330000 |
| C | -0.758890000 | 0.111090000  | 1.262130000  |
| C | -0.560000000 | -0.844240000 | 2.292040000  |
| C | -1.720280000 | 1.130450000  | 1.451760000  |
| C | -1.337210000 | -0.775610000 | 3.463350000  |
| C | -2.463840000 | 1.178560000  | 2.636610000  |
| C | -2.269280000 | 0.237690000  | 3.640690000  |
| H | -1.192490000 | -1.528970000 | 4.248300000  |
| H | -2.860140000 | 0.291840000  | 4.561630000  |
| C | 2.153040000  | 0.305790000  | 1.207820000  |

|   |              |              |              |
|---|--------------|--------------|--------------|
| C | 1.748160000  | 1.363410000  | 2.047670000  |
| C | 3.285630000  | -0.459130000 | 1.524390000  |
| C | 2.487670000  | 1.640700000  | 3.201510000  |
| H | 0.897580000  | 1.996610000  | 1.752680000  |
| C | 4.011090000  | -0.184140000 | 2.674980000  |
| H | 3.588660000  | -1.276930000 | 0.862120000  |
| C | 3.608660000  | 0.885150000  | 3.513380000  |
| H | 2.182020000  | 2.464400000  | 3.854110000  |
| H | 4.191030000  | 1.114820000  | 4.415100000  |
| H | -1.264120000 | 1.909450000  | -4.076020000 |
| H | -3.214160000 | 1.967730000  | 2.774550000  |
| H | -3.149170000 | -1.796410000 | -2.951970000 |
| H | 5.029710000  | 0.707120000  | -2.770070000 |
| H | 4.892540000  | -0.781110000 | 2.927330000  |
| C | 0.385590000  | 2.158950000  | -1.997230000 |
| H | 1.320070000  | 1.885440000  | -2.508650000 |
| H | 0.002810000  | 3.098610000  | -2.428890000 |
| H | 0.597950000  | 2.318010000  | -0.929720000 |
| C | -1.839990000 | -2.201620000 | -0.640850000 |
| H | -2.153520000 | -1.848160000 | 0.349070000  |
| H | -2.601740000 | -2.895920000 | -1.033800000 |
| H | -0.883850000 | -2.743950000 | -0.550550000 |
| C | 0.402580000  | -1.980920000 | 2.138120000  |
| H | 1.376730000  | -1.678360000 | 2.548190000  |
| H | 0.038420000  | -2.863670000 | 2.690480000  |
| H | 0.532230000  | -2.250990000 | 1.079350000  |
| C | -1.971990000 | 2.171780000  | 0.408420000  |
| H | -1.026320000 | 2.675490000  | 0.152260000  |
| H | -2.387650000 | 1.704410000  | -0.492620000 |
| H | -2.682650000 | 2.930010000  | 0.780110000  |

### Coord\_3

|   |              |              |              |
|---|--------------|--------------|--------------|
| C | 0.000000000  | 0.000000000  | 0.000000000  |
| C | 1.379860000  | 0.000000000  | 0.000000000  |
| C | -0.729820000 | 0.000000000  | -1.291750000 |
| C | -1.631500000 | -1.043000000 | -1.595730000 |
| C | -0.559820000 | 1.052420000  | -2.218290000 |
| C | -2.359750000 | -1.015060000 | -2.792830000 |
| C | -1.298810000 | 1.061080000  | -3.411070000 |
| C | -2.198050000 | 0.036530000  | -3.694090000 |
| H | -2.774710000 | 0.053820000  | -4.626710000 |
| C | 2.164700000  | -0.369510000 | -1.193150000 |
| C | 1.764300000  | -1.443740000 | -2.000270000 |
| C | 3.338730000  | 0.331930000  | -1.503780000 |
| C | 2.528690000  | -1.803620000 | -3.098570000 |
| H | 0.844090000  | -1.985480000 | -1.765240000 |
| C | 4.086020000  | -0.028540000 | -2.612850000 |
| H | 3.652990000  | 1.168510000  | -0.871820000 |
| C | 3.689300000  | -1.099240000 | -3.413210000 |

|   |              |              |              |
|---|--------------|--------------|--------------|
| H | 2.220000000  | -2.647990000 | -3.726220000 |
| H | 4.287680000  | -1.384600000 | -4.284290000 |
| C | -0.736930000 | 0.216900000  | 1.254290000  |
| C | -0.478680000 | -0.622060000 | 2.378720000  |
| C | -1.731910000 | 1.220490000  | 1.371290000  |
| C | -1.229760000 | -0.448050000 | 3.559750000  |
| C | -2.426400000 | 1.379130000  | 2.573220000  |
| C | -2.163070000 | 0.571370000  | 3.670350000  |
| H | -1.050980000 | -1.121160000 | 4.409530000  |
| H | -2.714690000 | 0.724130000  | 4.602650000  |
| C | 2.160860000  | 0.388510000  | 1.172380000  |
| C | 1.701290000  | 1.453980000  | 1.986450000  |
| C | 3.315920000  | -0.333290000 | 1.522280000  |
| C | 2.423190000  | 1.783680000  | 3.145350000  |
| H | 0.875890000  | 2.094240000  | 1.617680000  |
| C | 4.024810000  | -0.007080000 | 2.665330000  |
| H | 3.644180000  | -1.163360000 | 0.885580000  |
| C | 3.569520000  | 1.084250000  | 3.477080000  |
| H | 2.082690000  | 2.612170000  | 3.772830000  |
| H | 4.142060000  | 1.364270000  | 4.372210000  |
| H | -1.164890000 | 1.880800000  | -4.126800000 |
| H | -3.199730000 | 2.155760000  | 2.653410000  |
| H | -3.062400000 | -1.825250000 | -3.020550000 |
| H | 4.996590000  | 0.528620000  | -2.864340000 |
| H | 4.925450000  | -0.562960000 | 2.937410000  |
| C | 0.415650000  | 2.163850000  | -1.996260000 |
| H | 1.381500000  | 1.882710000  | -2.441700000 |
| H | 0.055930000  | 3.088490000  | -2.477380000 |
| H | 0.561620000  | 2.355920000  | -0.922650000 |
| C | -1.824430000 | -2.194720000 | -0.662980000 |
| H | -2.027930000 | -1.819360000 | 0.347350000  |
| H | -2.672680000 | -2.817020000 | -0.994690000 |
| H | -0.915310000 | -2.819300000 | -0.647990000 |
| C | 0.438360000  | -1.802080000 | 2.260240000  |
| H | 1.457400000  | -1.491790000 | 2.534280000  |
| H | 0.113250000  | -2.606090000 | 2.942150000  |
| H | 0.451880000  | -2.189990000 | 1.230180000  |
| C | -2.088210000 | 2.105840000  | 0.220030000  |
| H | -1.189700000 | 2.635730000  | -0.132180000 |
| H | -2.497080000 | 1.504010000  | -0.601170000 |
| H | -2.840380000 | 2.854560000  | 0.524490000  |

#### Coord\_4

|   |              |              |              |
|---|--------------|--------------|--------------|
| C | 0.000000000  | 0.000000000  | 0.000000000  |
| C | 1.388290000  | 0.000000000  | 0.000000000  |
| C | -0.699170000 | 0.000000000  | -1.309510000 |
| C | -1.588270000 | -1.050000000 | -1.629290000 |
| C | -0.511340000 | 1.046120000  | -2.240730000 |
| C | -2.281620000 | -1.038190000 | -2.846640000 |

|   |              |              |              |
|---|--------------|--------------|--------------|
| C | -1.213880000 | 1.038600000  | -3.454540000 |
| C | -2.097390000 | 0.004340000  | -3.754840000 |
| H | -2.644580000 | 0.007970000  | -4.705090000 |
| C | 2.161600000  | -0.450940000 | -1.173100000 |
| C | 1.754470000  | -1.581900000 | -1.893910000 |
| C | 3.326210000  | 0.233220000  | -1.548670000 |
| C | 2.507140000  | -2.017290000 | -2.974780000 |
| H | 0.841340000  | -2.108600000 | -1.605070000 |
| C | 4.060550000  | -0.202710000 | -2.641200000 |
| H | 3.641830000  | 1.116140000  | -0.984310000 |
| C | 3.658750000  | -1.331110000 | -3.354840000 |
| H | 2.194500000  | -2.905660000 | -3.535540000 |
| H | 4.246850000  | -1.675800000 | -4.211760000 |
| C | -0.714950000 | 0.322070000  | 1.237190000  |
| C | -0.397300000 | -0.389560000 | 2.441190000  |
| C | -1.742300000 | 1.304160000  | 1.287440000  |
| C | -1.122170000 | -0.107360000 | 3.621320000  |
| C | -2.387620000 | 1.578630000  | 2.493030000  |
| C | -2.056070000 | 0.914400000  | 3.664560000  |
| H | -0.909560000 | -0.694070000 | 4.527000000  |
| H | -2.568360000 | 1.168570000  | 4.595350000  |
| C | 2.168610000  | 0.467750000  | 1.131360000  |
| C | 1.658320000  | 1.537250000  | 1.922760000  |
| C | 3.345520000  | -0.209490000 | 1.510050000  |
| C | 2.365730000  | 1.916350000  | 3.083210000  |
| H | 0.862200000  | 2.185700000  | 1.488280000  |
| C | 4.039550000  | 0.166470000  | 2.642420000  |
| H | 3.697490000  | -1.050180000 | 0.898160000  |
| C | 3.535700000  | 1.272600000  | 3.427720000  |
| H | 1.993680000  | 2.747010000  | 3.688110000  |
| H | 4.100150000  | 1.600510000  | 4.313060000  |
| H | -1.063950000 | 1.852100000  | -4.174730000 |
| H | -3.183190000 | 2.338120000  | 2.519700000  |
| H | -2.973850000 | -1.854020000 | -3.086510000 |
| H | 4.962600000  | 0.340490000  | -2.946390000 |
| H | 4.958440000  | -0.347460000 | 2.930300000  |
| C | 0.445630000  | 2.168660000  | -1.995120000 |
| H | 1.438700000  | 1.881630000  | -2.372530000 |
| H | 0.112490000  | 3.077310000  | -2.523550000 |
| H | 0.524760000  | 2.393180000  | -0.920400000 |
| C | -1.809000000 | -2.187590000 | -0.685100000 |
| H | -1.900690000 | -1.802360000 | 0.337720000  |
| H | -2.732520000 | -2.728810000 | -0.951810000 |
| H | -0.960810000 | -2.890810000 | -0.741660000 |
| C | 0.465860000  | -1.615630000 | 2.375480000  |
| H | 1.517740000  | -1.323890000 | 2.514790000  |
| H | 0.183450000  | -2.323580000 | 3.173210000  |
| H | 0.364720000  | -2.115410000 | 1.399470000  |
| C | -2.201430000 | 2.018180000  | 0.056400000  |
| H | -1.356320000 | 2.557530000  | -0.396980000 |



|   |              |             |              |
|---|--------------|-------------|--------------|
| H | -2.598200000 | 1.295830000 | -0.668270000 |
| H | -2.992850000 | 2.747920000 | 0.303610000  |

Coord\_5

|   |              |              |              |
|---|--------------|--------------|--------------|
| C | 0.000000000  | 0.000000000  | 0.000000000  |
| C | 1.396720000  | 0.000000000  | 0.000000000  |
| C | -0.668080000 | 0.000000000  | -1.326550000 |
| C | -1.544280000 | -1.056950000 | -1.661700000 |
| C | -0.462170000 | 1.039750000  | -2.262040000 |
| C | -2.202030000 | -1.061280000 | -2.898160000 |
| C | -1.127600000 | 1.016120000  | -3.495590000 |
| C | -1.994990000 | -0.027810000 | -3.812450000 |
| H | -2.512130000 | -0.037800000 | -4.779210000 |
| C | 2.158410000  | -0.531280000 | -1.147360000 |
| C | 1.744820000  | -1.712140000 | -1.777890000 |
| C | 3.313300000  | 0.129960000  | -1.586730000 |
| C | 2.485630000  | -2.222280000 | -2.835990000 |
| H | 0.839080000  | -2.218940000 | -1.436440000 |
| C | 4.034530000  | -0.380810000 | -2.657410000 |
| H | 3.630050000  | 1.053800000  | -1.093270000 |
| C | 3.627940000  | -1.559980000 | -3.280220000 |
| H | 2.169220000  | -3.149400000 | -3.326840000 |
| H | 4.205650000  | -1.963360000 | -4.118800000 |
| C | -0.692980000 | 0.425770000  | 1.210900000  |
| C | -0.316050000 | -0.149580000 | 2.478190000  |
| C | -1.751350000 | 1.381720000  | 1.200730000  |
| C | -1.014670000 | 0.242470000  | 3.646330000  |
| C | -2.347660000 | 1.775450000  | 2.395590000  |
| C | -1.948620000 | 1.262630000  | 3.621700000  |
| H | -0.768510000 | -0.252740000 | 4.598380000  |
| H | -2.421650000 | 1.619240000  | 4.537730000  |
| C | 2.176290000  | 0.543120000  | 1.085100000  |
| C | 1.619590000  | 1.613520000  | 1.857350000  |
| C | 3.374410000  | -0.088520000 | 1.487970000  |
| C | 2.316000000  | 2.038940000  | 3.016150000  |
| H | 0.856030000  | 2.272240000  | 1.365320000  |
| C | 4.055350000  | 0.335540000  | 2.606690000  |
| H | 3.748520000  | -0.938400000 | 0.899970000  |
| C | 3.507910000  | 1.449700000  | 3.366500000  |
| H | 1.915890000  | 2.869700000  | 3.601230000  |
| H | 4.066190000  | 1.822980000  | 4.239090000  |
| H | -0.961400000 | 1.823360000  | -4.219760000 |
| H | -3.164650000 | 2.513920000  | 2.373340000  |
| H | -2.883610000 | -1.882720000 | -3.149790000 |
| H | 4.927740000  | 0.143640000  | -3.015330000 |
| H | 4.991500000  | -0.135940000 | 2.906440000  |
| C | 0.475540000  | 2.173380000  | -1.993840000 |
| H | 1.491550000  | 1.882180000  | -2.301490000 |
| H | 0.172370000  | 3.065150000  | -2.567170000 |

|   |              |              |              |
|---|--------------|--------------|--------------|
| H | 0.487710000  | 2.429670000  | -0.922980000 |
| C | -1.793700000 | -2.180240000 | -0.707230000 |
| H | -1.773530000 | -1.797690000 | 0.320440000  |
| H | -2.780100000 | -2.632570000 | -0.905930000 |
| H | -1.019540000 | -2.956650000 | -0.831150000 |
| C | 0.486120000  | -1.420110000 | 2.484080000  |
| H | 1.558870000  | -1.172750000 | 2.495730000  |
| H | 0.249500000  | -2.016970000 | 3.381440000  |
| H | 0.273210000  | -2.020710000 | 1.585470000  |
| C | -2.310700000 | 1.913900000  | -0.079850000 |
| H | -1.525050000 | 2.445130000  | -0.636380000 |
| H | -2.690300000 | 1.087010000  | -0.693980000 |
| H | -3.138340000 | 2.617760000  | 0.121400000  |

### Coord\_6

|   |              |              |              |
|---|--------------|--------------|--------------|
| C | 0.000000000  | 0.000000000  | 0.000000000  |
| C | 1.405150000  | 0.000000000  | 0.000000000  |
| C | -0.636580000 | 0.000000000  | -1.342850000 |
| C | -1.499570000 | -1.063870000 | -1.692940000 |
| C | -0.412310000 | 1.033320000  | -2.282210000 |
| C | -2.121050000 | -1.084330000 | -2.947330000 |
| C | -1.040070000 | 0.993630000  | -3.534170000 |
| C | -1.890940000 | -0.059910000 | -3.866850000 |
| H | -2.377500000 | -0.083470000 | -4.849010000 |
| C | 2.155160000  | -0.610130000 | -1.116010000 |
| C | 1.735350000  | -1.833770000 | -1.652830000 |
| C | 3.300010000  | 0.022650000  | -1.617550000 |
| C | 2.464170000  | -2.417530000 | -2.682840000 |
| H | 0.837320000  | -2.315920000 | -1.260360000 |
| C | 4.007960000  | -0.561980000 | -2.661060000 |
| H | 3.617680000  | 0.981780000  | -1.197830000 |
| C | 3.596860000  | -1.784670000 | -3.189510000 |
| H | 2.144160000  | -3.377960000 | -3.101130000 |
| H | 4.164100000  | -2.245810000 | -4.005580000 |
| C | -0.671010000 | 0.527160000  | 1.175570000  |
| C | -0.235090000 | 0.094940000  | 2.488800000  |
| C | -1.758960000 | 1.453460000  | 1.111580000  |
| C | -0.907530000 | 0.597240000  | 3.633540000  |
| C | -2.306700000 | 1.967870000  | 2.280660000  |
| C | -1.841030000 | 1.611680000  | 3.540680000  |
| H | -0.628160000 | 0.197530000  | 4.621940000  |
| H | -2.275070000 | 2.069960000  | 4.428530000  |
| C | 2.183910000  | 0.614300000  | 1.033920000  |
| C | 1.585440000  | 1.683200000  | 1.790870000  |
| C | 3.402570000  | 0.028830000  | 1.456350000  |
| C | 2.274660000  | 2.151800000  | 2.945080000  |
| H | 0.857030000  | 2.354980000  | 1.249360000  |
| C | 4.072220000  | 0.499240000  | 2.558680000  |
| H | 3.797180000  | -0.829000000 | 0.891230000  |

|   |              |              |              |
|---|--------------|--------------|--------------|
| C | 3.486790000  | 1.615250000  | 3.294530000  |
| H | 1.850140000  | 2.981150000  | 3.513240000  |
| H | 4.041020000  | 2.031310000  | 4.151640000  |
| H | -0.857320000 | 1.794600000  | -4.261850000 |
| H | -3.144240000 | 2.682210000  | 2.214360000  |
| H | -2.791750000 | -1.911340000 | -3.210340000 |
| H | 4.892010000  | -0.060990000 | -3.070350000 |
| H | 5.024630000  | 0.070330000  | 2.866340000  |
| C | 0.505410000  | 2.177990000  | -1.992410000 |
| H | 1.539950000  | 1.884360000  | -2.228880000 |
| H | 0.235400000  | 3.052080000  | -2.608010000 |
| H | 0.450840000  | 2.465330000  | -0.930380000 |
| C | -1.778520000 | -2.172680000 | -0.729410000 |
| H | -1.648210000 | -1.805660000 | 0.295800000  |
| H | -2.814460000 | -2.529770000 | -0.857760000 |
| H | -1.090480000 | -3.015050000 | -0.916140000 |
| C | 0.500260000  | -1.213800000 | 2.585560000  |
| H | 1.582210000  | -1.034950000 | 2.482270000  |
| H | 0.311920000  | -1.687220000 | 3.564380000  |
| H | 0.179730000  | -1.899640000 | 1.784710000  |
| C | -2.415090000 | 1.798420000  | -0.187030000 |
| H | -1.694720000 | 2.303640000  | -0.845460000 |
| H | -2.772700000 | 0.884520000  | -0.679530000 |
| H | -3.275210000 | 2.472240000  | -0.019720000 |

### Coord\_7

|   |              |              |              |
|---|--------------|--------------|--------------|
| C | 0.000000000  | 0.000000000  | 0.000000000  |
| C | 1.413580000  | 0.000000000  | 0.000000000  |
| C | -0.604680000 | 0.000000000  | -1.358400000 |
| C | -1.454180000 | -1.070760000 | -1.723000000 |
| C | -0.361800000 | 1.026830000  | -2.301220000 |
| C | -2.038740000 | -1.107330000 | -2.994120000 |
| C | -0.951360000 | 0.971150000  | -3.570240000 |
| C | -1.785360000 | -0.091940000 | -3.918010000 |
| H | -2.240850000 | -0.129030000 | -4.914440000 |
| C | 2.151830000  | -0.687090000 | -1.079130000 |
| C | 1.726040000  | -1.946170000 | -1.519370000 |
| C | 3.286330000  | -0.088170000 | -1.640750000 |
| C | 2.442780000  | -2.602010000 | -2.516020000 |
| H | 0.836050000  | -2.399070000 | -1.077890000 |
| C | 3.980860000  | -0.745280000 | -2.651820000 |
| H | 3.604700000  | 0.900410000  | -1.297190000 |
| C | 3.565540000  | -2.004030000 | -3.082930000 |
| H | 2.119330000  | -3.590120000 | -2.859550000 |
| H | 4.122210000  | -2.521680000 | -3.872380000 |
| C | -0.649050000 | 0.625440000  | 1.131400000  |
| C | -0.154610000 | 0.340940000  | 2.472460000  |
| C | -1.765040000 | 1.519690000  | 1.020290000  |
| C | -0.801010000 | 0.952570000  | 3.582210000  |

|   |              |              |              |
|---|--------------|--------------|--------------|
| C | -2.264920000 | 2.154070000  | 2.148200000  |
| C | -1.733650000 | 1.957010000  | 3.420980000  |
| H | -0.488800000 | 0.651250000  | 4.596620000  |
| H | -2.129120000 | 2.514350000  | 4.267320000  |
| C | 2.191450000  | 0.680970000  | 0.978190000  |
| C | 1.556160000  | 1.746720000  | 1.723850000  |
| C | 3.429990000  | 0.141800000  | 1.415580000  |
| C | 2.242280000  | 2.255380000  | 2.870790000  |
| H | 0.865000000  | 2.434830000  | 1.140710000  |
| C | 4.090180000  | 0.656690000  | 2.498970000  |
| H | 3.843380000  | -0.722930000 | 0.872230000  |
| C | 3.472890000  | 1.769010000  | 3.212860000  |
| H | 1.797160000  | 3.082360000  | 3.424950000  |
| H | 4.025320000  | 2.225240000  | 4.051960000  |
| H | -0.751820000 | 1.765810000  | -4.300960000 |
| H | -3.122070000 | 2.841970000  | 2.042860000  |
| H | -2.698350000 | -1.939870000 | -3.268110000 |
| H | 4.855440000  | -0.272340000 | -3.110680000 |
| H | 5.057800000  | 0.270090000  | 2.810640000  |
| C | 0.535230000  | 2.182500000  | -1.990830000 |
| H | 1.583800000  | 1.888120000  | -2.155050000 |
| H | 0.301410000  | 3.038170000  | -2.645870000 |
| H | 0.414500000  | 2.500050000  | -0.942550000 |
| C | -1.763420000 | -2.164920000 | -0.751660000 |
| H | -1.526500000 | -1.826310000 | 0.264140000  |
| H | -2.834860000 | -2.422070000 | -0.807970000 |
| H | -1.172400000 | -3.064350000 | -0.996430000 |
| C | 0.509430000  | -0.994960000 | 2.678730000  |
| H | 1.589390000  | -0.905870000 | 2.478320000  |
| H | 0.371260000  | -1.335480000 | 3.719300000  |
| H | 0.086560000  | -1.746680000 | 1.992050000  |
| C | -2.513680000 | 1.677300000  | -0.264420000 |
| H | -1.864120000 | 2.138950000  | -1.020170000 |
| H | -2.844820000 | 0.694960000  | -0.627230000 |
| H | -3.401860000 | 2.319740000  | -0.118890000 |

### Coord\_8

|   |              |              |              |
|---|--------------|--------------|--------------|
| C | 0.000000000  | 0.810090000  | 0.000000000  |
| C | 1.422000000  | -2.216900000 | 0.000000000  |
| C | -0.572410000 | -3.784790000 | -1.373200000 |
| C | -1.408130000 | -2.789520000 | -1.751850000 |
| C | -0.310670000 | 0.719800000  | -2.319050000 |
| C | -1.955180000 | 0.585260000  | -3.038470000 |
| C | -0.861550000 | 1.580720000  | -3.603790000 |
| C | -1.678350000 | 1.304030000  | -3.965880000 |
| H | -2.102330000 | 2.332220000  | -4.975430000 |
| C | 2.148430000  | 2.293990000  | -1.036850000 |
| C | 1.716920000  | 1.102800000  | -1.378200000 |
| C | 3.272280000  | 2.945970000  | -1.656010000 |

|   |              |              |              |
|---|--------------|--------------|--------------|
| C | 2.421440000  | 0.742850000  | -2.336310000 |
| H | 0.835280000  | 1.804560000  | -0.890120000 |
| C | 3.953210000  | 0.249680000  | -2.629410000 |
| H | 3.591120000  | 2.350180000  | -1.390530000 |
| C | 3.533960000  | 2.512540000  | -2.960800000 |
| H | 2.094720000  | 0.807100000  | -2.603310000 |
| H | 4.079980000  | -0.621140000 | -3.719590000 |
| C | -0.627110000 | 1.910870000  | 1.078710000  |
| C | -0.074780000 | 3.174360000  | 2.428970000  |
| C | -1.769490000 | 2.404620000  | 0.927110000  |
| C | -0.695380000 | 1.737010000  | 3.492130000  |
| C | -2.222490000 | 2.992120000  | 1.998400000  |
| C | -1.626810000 | -1.968310000 | 3.262620000  |
| H | -0.350740000 | -0.489310000 | 4.521970000  |
| H | -1.984310000 | 0.462190000  | 4.054490000  |
| C | 2.198930000  | 2.186890000  | 0.918290000  |
| C | 1.532040000  | 1.893440000  | 1.656730000  |
| C | 3.456660000  | 3.023500000  | 1.366110000  |
| C | 2.219360000  | 2.533740000  | 2.793870000  |
| H | 0.879900000  | -2.156980000 | 1.039480000  |
| C | 4.109230000  | -1.859390000 | 2.428180000  |
| H | 3.887070000  | -2.311300000 | 0.843370000  |
| C | 3.466680000  | -3.103020000 | 3.122400000  |
| H | 1.757590000  | -0.761990000 | 3.336910000  |
| H | 4.019690000  | -0.779980000 | 3.941110000  |
| H | -0.644980000 | -0.963250000 | -4.337050000 |
| H | -3.098260000 | -1.557380000 | 1.859070000  |
| H | -2.603500000 | 1.556120000  | -3.323070000 |
| H | 4.818020000  | 1.957520000  | -3.135680000 |
| H | 5.091000000  | 0.524340000  | 2.740030000  |
| C | 0.565030000  | 2.168580000  | -1.989120000 |
| H | 1.623040000  | 0.810090000  | -2.080320000 |
| H | 0.370210000  | -2.216900000 | -2.680530000 |
| H | 0.379050000  | -3.784790000 | -0.959420000 |
| C | -1.748390000 | -2.789520000 | -0.774000000 |
| H | -1.410110000 | 0.719800000  | 0.225760000  |
| H | -2.840770000 | 0.585260000  | -0.757150000 |
| H | -1.263820000 | 1.580720000  | -1.071850000 |
| C | 0.514780000  | 1.304030000  | 2.761560000  |
| H | 1.582260000  | 2.332220000  | 2.486360000  |
| H | 0.428080000  | 2.293990000  | 3.843220000  |
| H | -0.004170000 | 1.102800000  | 2.200830000  |
| C | -2.605600000 | 2.945970000  | -0.312250000 |
| H | -2.031950000 | 0.742850000  | -1.157550000 |
| H | -2.906160000 | 1.804560000  | -0.540370000 |
| H | -3.516780000 | 0.249680000  | -0.176820000 |

Coord\_9

|   |             |             |             |
|---|-------------|-------------|-------------|
| C | 0.000000000 | 0.000000000 | 0.000000000 |
|---|-------------|-------------|-------------|

|   |              |              |              |
|---|--------------|--------------|--------------|
| C | 1.430430000  | 0.000000000  | 0.000000000  |
| C | -0.539770000 | 0.000000000  | -1.387220000 |
| C | -1.361460000 | -1.084410000 | -1.779480000 |
| C | -0.258950000 | 1.013650000  | -2.335680000 |
| C | -1.870440000 | -1.153180000 | -3.080360000 |
| C | -0.770710000 | 0.926240000  | -3.634780000 |
| C | -1.570010000 | -0.155790000 | -4.010440000 |
| H | -1.962080000 | -0.219760000 | -5.031940000 |
| C | 2.144960000  | -0.833760000 | -0.989290000 |
| C | 1.707970000  | -2.140980000 | -1.230050000 |
| C | 3.257850000  | -0.318060000 | -1.663020000 |
| C | 2.400170000  | -2.934870000 | -2.144540000 |
| H | 0.835000000  | -2.522310000 | -0.698150000 |
| C | 3.925040000  | -1.114470000 | -2.593630000 |
| H | 3.576950000  | 0.711320000  | -1.477110000 |
| C | 3.502140000  | -2.422150000 | -2.823540000 |
| H | 2.070350000  | -3.960950000 | -2.333690000 |
| H | 4.037420000  | -3.047900000 | -3.547700000 |
| C | -0.605190000 | 0.809490000  | 1.017850000  |
| C | 0.004210000  | 0.824760000  | 2.358520000  |
| C | -1.772230000 | 1.636830000  | 0.832160000  |
| C | -0.590900000 | 1.647120000  | 3.363660000  |
| C | -2.179570000 | 2.500440000  | 1.831660000  |
| C | -1.520850000 | 2.617980000  | 3.066240000  |
| H | -0.214290000 | 1.546530000  | 4.398270000  |
| H | -1.841130000 | 3.358470000  | 3.791290000  |
| C | 2.206350000  | 0.799690000  | 0.854620000  |
| C | 1.513310000  | 1.857220000  | 1.589850000  |
| C | 3.482570000  | 0.351800000  | 1.308440000  |
| C | 2.206310000  | 2.436720000  | 2.714760000  |
| H | 0.901880000  | 2.588620000  | 0.945580000  |
| C | 4.129370000  | 0.949720000  | 2.347000000  |
| H | 3.928170000  | -0.524510000 | 0.805140000  |
| C | 3.468490000  | 2.040750000  | 3.023980000  |
| H | 1.731970000  | 3.258180000  | 3.249410000  |
| H | 4.024570000  | 2.569350000  | 3.820080000  |
| H | -0.536900000 | 1.708210000  | -4.370070000 |
| H | -3.072920000 | 3.131560000  | 1.663360000  |
| H | -2.507290000 | -1.996650000 | -3.375150000 |
| H | 4.779760000  | -0.710730000 | -3.144750000 |
| H | 5.124190000  | 0.645510000  | 2.655320000  |
| C | 0.594820000  | 2.191150000  | -1.987270000 |
| H | 1.657650000  | 1.900290000  | -2.005040000 |
| H | 0.441590000  | 3.008160000  | -2.711820000 |
| H | 0.344810000  | 2.566340000  | -0.980900000 |
| C | -1.733410000 | -2.148840000 | -0.796470000 |
| H | -1.300720000 | -1.904380000 | 0.180980000  |
| H | -2.831920000 | -2.199370000 | -0.705820000 |
| H | -1.363140000 | -3.129740000 | -1.142290000 |
| C | 0.517440000  | -0.513710000 | 2.831320000  |

|   |              |              |              |
|---|--------------|--------------|--------------|
| H | 1.562770000  | -0.651240000 | 2.507140000  |
| H | 0.482940000  | -0.572470000 | 3.932930000  |
| H | -0.090550000 | -1.328790000 | 2.403190000  |
| C | -2.690010000 | 1.440250000  | -0.331730000 |
| H | -2.196910000 | 1.766240000  | -1.255770000 |
| H | -2.956300000 | 0.378040000  | -0.423180000 |
| H | -3.618560000 | 2.026720000  | -0.195760000 |

### Coord\_10

|   |              |              |              |
|---|--------------|--------------|--------------|
| C | 0.000000000  | 0.000000000  | 0.000000000  |
| C | 1.438860000  | 0.000000000  | 0.000000000  |
| C | -0.506780000 | 0.000000000  | -1.400470000 |
| C | -1.314200000 | -1.091190000 | -1.805870000 |
| C | -0.206670000 | 1.006980000  | -2.351100000 |
| C | -1.784590000 | -1.176010000 | -3.119750000 |
| C | -0.678930000 | 0.903810000  | -3.663180000 |
| C | -1.460470000 | -0.187580000 | -4.051650000 |
| H | -1.820260000 | -0.264900000 | -5.083940000 |
| C | 2.141410000  | -0.902720000 | -0.936650000 |
| C | 1.699200000  | -2.222380000 | -1.075690000 |
| C | 3.243040000  | -0.435920000 | -1.661540000 |
| C | 2.378960000  | -3.081490000 | -1.941640000 |
| H | 0.835210000  | -2.561850000 | -0.503130000 |
| C | 3.896340000  | -1.298360000 | -2.544360000 |
| H | 3.562190000  | 0.604630000  | -1.556190000 |
| C | 3.470090000  | -2.618680000 | -2.671620000 |
| H | 2.046210000  | -4.117660000 | -2.052050000 |
| H | 3.994540000  | -3.295430000 | -3.357320000 |
| C | -0.583310000 | 0.893780000  | 0.949260000  |
| C | 0.082190000  | 1.056320000  | 2.261690000  |
| C | -1.773190000 | 1.688290000  | 0.735510000  |
| C | -0.487840000 | 1.977410000  | 3.197660000  |
| C | -2.136340000 | 2.656900000  | 1.648650000  |
| C | -1.416110000 | 2.924400000  | 2.833070000  |
| H | -0.079750000 | 1.976820000  | 4.226430000  |
| H | -1.700090000 | 3.745610000  | 3.479760000  |
| C | 2.213690000  | 0.851270000  | 0.787580000  |
| C | 1.500200000  | 1.905210000  | 1.523420000  |
| C | 3.507700000  | 0.447530000  | 1.243120000  |
| C | 2.203460000  | 2.515500000  | 2.633750000  |
| H | 0.931290000  | 2.663410000  | 0.858740000  |
| C | 4.150580000  | 1.083840000  | 2.256140000  |
| H | 3.966640000  | -0.433870000 | 0.758090000  |
| C | 3.478600000  | 2.158620000  | 2.918330000  |
| H | 1.720710000  | 3.334800000  | 3.162550000  |
| H | 4.040280000  | 2.719360000  | 3.689680000  |
| H | -0.427680000 | 1.679410000  | -4.399990000 |
| H | -3.046170000 | 3.259170000  | 1.456210000  |
| H | -2.409810000 | -2.024890000 | -3.424330000 |

|   |              |              |              |
|---|--------------|--------------|--------------|
| H | 4.740680000  | -0.935380000 | -3.137410000 |
| H | 5.157350000  | 0.819020000  | 2.557380000  |
| C | 0.624620000  | 2.195290000  | -1.985290000 |
| H | 1.687610000  | 1.908610000  | -1.929530000 |
| H | 0.515350000  | 2.992200000  | -2.739580000 |
| H | 0.312140000  | 2.597750000  | -1.006870000 |
| C | -1.718460000 | -2.140540000 | -0.819080000 |
| H | -1.199880000 | -1.960500000 | 0.130100000  |
| H | -2.808320000 | -2.088310000 | -0.654460000 |
| H | -1.468560000 | -3.143400000 | -1.207700000 |
| C | 0.518520000  | -0.249520000 | 2.884620000  |
| H | 1.533010000  | -0.513560000 | 2.539690000  |
| H | 0.536370000  | -0.165660000 | 3.985080000  |
| H | -0.170890000 | -1.059690000 | 2.590350000  |
| C | -2.766120000 | 1.334760000  | -0.324960000 |
| H | -2.357680000 | 1.572210000  | -1.314190000 |
| H | -2.994910000 | 0.260570000  | -0.280580000 |
| H | -3.705900000 | 1.901490000  | -0.179350000 |

#### Coord\_11

|   |              |              |              |
|---|--------------|--------------|--------------|
| C | 0.000000000  | 0.000000000  | 0.000000000  |
| C | 1.424050000  | 0.000000000  | 0.000000000  |
| C | -0.667930000 | 0.000000000  | -1.235150000 |
| C | -2.075830000 | 0.220030000  | -1.291760000 |
| C | 0.055700000  | -0.310630000 | -2.488370000 |
| C | -2.777190000 | -0.180010000 | -2.407470000 |
| H | -2.586560000 | 0.651180000  | -0.438420000 |
| C | -0.777150000 | -0.617200000 | -3.619820000 |
| H | 0.752200000  | 0.500900000  | -2.762430000 |
| C | -2.141190000 | -0.675630000 | -3.558660000 |
| H | -2.748180000 | -1.061230000 | -4.369590000 |
| C | 2.107070000  | -0.595260000 | -1.048430000 |
| C | 1.274750000  | -1.408910000 | -1.943720000 |
| C | 3.509040000  | -0.443880000 | -1.292930000 |
| C | 1.941610000  | -1.894460000 | -3.141520000 |
| H | 0.585440000  | -2.142940000 | -1.378970000 |
| C | 4.089520000  | -1.009340000 | -2.389170000 |
| H | 4.093680000  | 0.176030000  | -0.595770000 |
| C | 3.282400000  | -1.748220000 | -3.288410000 |
| H | 1.353620000  | -2.449460000 | -3.870600000 |
| H | 3.795130000  | -2.213680000 | -4.151950000 |
| C | -0.718510000 | 0.325550000  | 1.247440000  |
| C | -0.988260000 | -0.705460000 | 2.161140000  |
| C | -1.140530000 | 1.634150000  | 1.539760000  |
| C | -1.662840000 | -0.429900000 | 3.348600000  |
| H | -0.654180000 | -1.723140000 | 1.934940000  |
| C | -1.824360000 | 1.906420000  | 2.729000000  |
| H | -0.935430000 | 2.446710000  | 0.829620000  |
| C | -2.082850000 | 0.871230000  | 3.637560000  |



|   |              |              |              |
|---|--------------|--------------|--------------|
| H | -1.867070000 | -1.236100000 | 4.065000000  |
| H | -2.608990000 | 1.083960000  | 4.575630000  |
| C | 2.195740000  | 0.635310000  | 1.098830000  |
| C | 2.111990000  | 2.016100000  | 1.320550000  |
| C | 3.001330000  | -0.171930000 | 1.914350000  |
| C | 2.855510000  | 2.589710000  | 2.348250000  |
| H | 1.483470000  | 2.636070000  | 0.674350000  |
| C | 3.726250000  | 0.408290000  | 2.959130000  |
| H | 3.044260000  | -1.251200000 | 1.738090000  |
| C | 3.654900000  | 1.793110000  | 3.173980000  |
| H | 2.808280000  | 3.671740000  | 2.517760000  |
| H | 4.221420000  | 2.248670000  | 3.993990000  |
| C | 5.553520000  | -0.918310000 | -2.661780000 |
| H | 6.014400000  | -0.139450000 | -2.030510000 |
| H | 6.043150000  | -1.886150000 | -2.442080000 |
| H | 5.732490000  | -0.663980000 | -3.722600000 |
| C | -2.305240000 | 3.293250000  | 3.026490000  |
| H | -3.340240000 | 3.399480000  | 2.667010000  |
| H | -2.279240000 | 3.484110000  | 4.110100000  |
| H | -1.670580000 | 4.037390000  | 2.520840000  |
| C | 4.563820000  | -0.448560000 | 3.855800000  |
| H | 5.023210000  | -1.267310000 | 3.282340000  |
| H | 5.362190000  | 0.147010000  | 4.324700000  |
| H | 3.923040000  | -0.873330000 | 4.642540000  |
| H | -0.261410000 | -0.827940000 | -4.576860000 |
| C | -4.271050000 | -0.099310000 | -2.423090000 |
| H | -4.581660000 | 0.571960000  | -3.234360000 |
| H | -4.681790000 | -1.100580000 | -2.607940000 |
| H | -4.659040000 | 0.280600000  | -1.469000000 |

### Coord\_12

|   |              |              |              |
|---|--------------|--------------|--------------|
| C | 0.000000000  | 0.000000000  | 0.000000000  |
| C | 1.432590000  | 0.000000000  | 0.000000000  |
| C | -0.680880000 | 0.000000000  | -1.213020000 |
| C | -2.107360000 | 0.121140000  | -1.244000000 |
| C | 0.063610000  | -0.129570000 | -2.497490000 |
| C | -2.797820000 | -0.201560000 | -2.383150000 |
| H | -2.632380000 | 0.423480000  | -0.338990000 |
| C | -0.777150000 | -0.526180000 | -3.628260000 |
| H | 0.551250000  | 0.848380000  | -2.745870000 |
| C | -2.129780000 | -0.604780000 | -3.552880000 |
| H | -2.738410000 | -0.971360000 | -4.379080000 |
| C | 2.121870000  | -0.436700000 | -1.113400000 |
| C | 1.327520000  | -1.073530000 | -2.192680000 |
| C | 3.547090000  | -0.326540000 | -1.239090000 |
| C | 2.062980000  | -1.219120000 | -3.461030000 |
| H | 0.849760000  | -2.048750000 | -1.815720000 |
| C | 4.170870000  | -0.648960000 | -2.407070000 |
| H | 4.114590000  | 0.064760000  | -0.383400000 |

|   |              |              |              |
|---|--------------|--------------|--------------|
| C | 3.405640000  | -1.075120000 | -3.514080000 |
| H | 1.497800000  | -1.518370000 | -4.347860000 |
| H | 3.954030000  | -1.263940000 | -4.452090000 |
| C | -0.711120000 | 0.189210000  | 1.281490000  |
| C | -0.965090000 | -0.925170000 | 2.094570000  |
| C | -1.132980000 | 1.463610000  | 1.694020000  |
| C | -1.634400000 | -0.764410000 | 3.305780000  |
| H | -0.631890000 | -1.916030000 | 1.770870000  |
| C | -1.807050000 | 1.619950000  | 2.908970000  |
| H | -0.930760000 | 2.336670000  | 1.061220000  |
| C | -2.055110000 | 0.502580000  | 3.717940000  |
| H | -1.834850000 | -1.635560000 | 3.942190000  |
| H | -2.574250000 | 0.624360000  | 4.675750000  |
| C | 2.173980000  | 0.471610000  | 1.194890000  |
| C | 2.223940000  | 1.838430000  | 1.498750000  |
| C | 2.816110000  | -0.463990000 | 2.018590000  |
| C | 2.932880000  | 2.266980000  | 2.618070000  |
| H | 1.723280000  | 2.560390000  | 0.846900000  |
| C | 3.512800000  | -0.027800000 | 3.149160000  |
| H | 2.758120000  | -1.530370000 | 1.777990000  |
| C | 3.571190000  | 1.341220000  | 3.448230000  |
| H | 2.989350000  | 3.336540000  | 2.852890000  |
| H | 4.112690000  | 1.683870000  | 4.337360000  |
| C | 5.651780000  | -0.576410000 | -2.572050000 |
| H | 6.116400000  | -0.097460000 | -1.694610000 |
| H | 6.067350000  | -1.594100000 | -2.682860000 |
| H | 5.905360000  | 0.010330000  | -3.472510000 |
| C | -2.284250000 | 2.971090000  | 3.344150000  |
| H | -3.349500000 | 3.076080000  | 3.088380000  |
| H | -2.160520000 | 3.086590000  | 4.431330000  |
| H | -1.713200000 | 3.763660000  | 2.836510000  |
| C | 4.177430000  | -1.018880000 | 4.052920000  |
| H | 4.494100000  | -1.905670000 | 3.483630000  |
| H | 5.061380000  | -0.570810000 | 4.531780000  |
| H | 3.462600000  | -1.326020000 | 4.830380000  |
| H | -0.263850000 | -0.755010000 | -4.578530000 |
| C | -4.291330000 | -0.167830000 | -2.414730000 |
| H | -4.619350000 | 0.552620000  | -3.178200000 |
| H | -4.672810000 | -1.165670000 | -2.676760000 |
| H | -4.700590000 | 0.129290000  | -1.438840000 |

### Coord\_13

|   |              |              |              |
|---|--------------|--------------|--------------|
| C | 0.000000000  | 0.000000000  | 0.000000000  |
| C | 1.455310000  | 0.000000000  | 0.000000000  |
| C | -0.617590000 | 0.000000000  | -1.344160000 |
| C | -0.820500000 | -1.196880000 | -2.058850000 |
| C | -0.952570000 | 1.234140000  | -1.940310000 |
| C | -1.374580000 | -1.152050000 | -3.343320000 |
| C | -1.504690000 | 1.260280000  | -3.224720000 |

|   |              |              |              |
|---|--------------|--------------|--------------|
| C | -1.710610000 | 0.070340000  | -3.924950000 |
| H | -2.133080000 | 0.095840000  | -4.936120000 |
| C | 2.162570000  | -0.360340000 | -1.251880000 |
| C | 2.778810000  | -1.619450000 | -1.356410000 |
| C | 2.242320000  | 0.548070000  | -2.318660000 |
| C | 3.468080000  | -1.961600000 | -2.517020000 |
| H | 2.726900000  | -2.318330000 | -0.515720000 |
| C | 2.933610000  | 0.196760000  | -3.475340000 |
| H | 1.746950000  | 1.519560000  | -2.243500000 |
| C | 3.543810000  | -1.057170000 | -3.579840000 |
| H | 3.964410000  | -2.935370000 | -2.594580000 |
| H | 4.082880000  | -1.330050000 | -4.493660000 |
| C | -0.690130000 | 0.071800000  | 1.181860000  |
| C | 0.068790000  | 0.081550000  | 2.495570000  |
| C | -2.146560000 | 0.037970000  | 1.262120000  |
| C | -0.698810000 | 0.776170000  | 3.589190000  |
| C | -2.774910000 | 0.432600000  | 2.406050000  |
| C | -2.034620000 | 0.916270000  | 3.545230000  |
| H | -0.136390000 | 1.130080000  | 4.463800000  |
| H | -2.594000000 | 1.407170000  | 4.350460000  |
| C | 2.168570000  | 0.303790000  | 1.128060000  |
| C | 1.443290000  | 0.766340000  | 2.357710000  |
| C | 3.612560000  | 0.308110000  | 1.120120000  |
| C | 2.283020000  | 0.610600000  | 3.586280000  |
| H | 1.273210000  | 1.892110000  | 2.230610000  |
| C | 4.314600000  | 0.445330000  | 2.270210000  |
| H | 4.124760000  | 0.171000000  | 0.160860000  |
| C | 3.623250000  | 0.513310000  | 3.539000000  |
| H | 1.769940000  | 0.628390000  | 4.558660000  |
| H | 4.228280000  | 0.436630000  | 4.450240000  |
| H | -1.785150000 | 2.217260000  | -3.680110000 |
| H | -3.869710000 | 0.416090000  | 2.481090000  |
| H | -1.535270000 | -2.082670000 | -3.899680000 |
| H | 2.992300000  | 0.900680000  | -4.312950000 |
| H | 5.409760000  | 0.461480000  | 2.278310000  |
| C | -0.752960000 | 2.508720000  | -1.182820000 |
| H | 0.286800000  | 2.575500000  | -0.828530000 |
| H | -0.969450000 | 3.380020000  | -1.822950000 |
| H | -1.424880000 | 2.527700000  | -0.314350000 |
| C | -0.438350000 | -2.515120000 | -1.464960000 |
| H | -0.489760000 | -2.474110000 | -0.368050000 |
| H | -1.112440000 | -3.308860000 | -1.825310000 |
| H | 0.591300000  | -2.752870000 | -1.767520000 |
| C | 0.228680000  | -1.391760000 | 2.913050000  |
| H | 0.822680000  | -1.928520000 | 2.158990000  |
| H | 0.742020000  | -1.464970000 | 3.882720000  |
| H | -0.759670000 | -1.865190000 | 2.997910000  |
| C | -2.997780000 | -0.420920000 | 0.122280000  |
| H | -2.974460000 | 0.311620000  | -0.695020000 |
| H | -2.638540000 | -1.390130000 | -0.250120000 |

|   |              |              |             |
|---|--------------|--------------|-------------|
| H | -4.045140000 | -0.540560000 | 0.453820000 |
|---|--------------|--------------|-------------|

S<sub>0</sub>\_S<sub>1</sub>S<sub>0</sub>-pyr(C1)

Coord\_1

|   |              |              |              |
|---|--------------|--------------|--------------|
| C | 0.000000000  | 0.000000000  | 0.000000000  |
| C | 1.363000000  | 0.000000000  | 0.000000000  |
| C | -0.789760000 | 0.000000000  | -1.254080000 |
| C | -1.715610000 | -1.028920000 | -1.525220000 |
| C | -0.654530000 | 1.064840000  | -2.170140000 |
| C | -2.511350000 | -0.968720000 | -2.678500000 |
| C | -1.464390000 | 1.105990000  | -3.316990000 |
| C | -2.393720000 | 0.101020000  | -3.563320000 |
| H | -3.027440000 | 0.145700000  | -4.457450000 |
| C | 2.170680000  | -0.205010000 | -1.216140000 |
| C | 1.784440000  | -1.146560000 | -2.181910000 |
| C | 3.362600000  | 0.513950000  | -1.395350000 |
| C | 2.571940000  | -1.354700000 | -3.299100000 |
| H | 0.851070000  | -1.703560000 | -2.056320000 |
| C | 4.135290000  | 0.304630000  | -2.521670000 |
| H | 3.673490000  | 1.242630000  | -0.639700000 |
| C | 3.749590000  | -0.631160000 | -3.481050000 |
| H | 2.271630000  | -2.096340000 | -4.049830000 |
| H | 4.368240000  | -0.797160000 | -4.367940000 |
| C | -0.780850000 | 0.005490000  | 1.260730000  |
| C | -0.641110000 | -1.053520000 | 2.182740000  |
| C | -1.707510000 | 1.033850000  | 1.528270000  |
| C | -1.444240000 | -1.086340000 | 3.334320000  |
| C | -2.499770000 | 0.978410000  | 2.683810000  |
| C | -2.374370000 | -0.082820000 | 3.577680000  |
| H | -1.333780000 | -1.912850000 | 4.046220000  |
| H | -3.004200000 | -0.122780000 | 4.475070000  |
| C | 2.145150000  | 0.219970000  | 1.237400000  |
| C | 1.798560000  | 1.265310000  | 2.105620000  |
| C | 3.254650000  | -0.586170000 | 1.516190000  |
| C | 2.558410000  | 1.487290000  | 3.250490000  |
| H | 0.927800000  | 1.891420000  | 1.892140000  |
| C | 3.998360000  | -0.363710000 | 2.670960000  |
| H | 3.531030000  | -1.389890000 | 0.827760000  |
| C | 3.652340000  | 0.675920000  | 3.535380000  |
| H | 2.290700000  | 2.303100000  | 3.930450000  |
| H | 4.246060000  | 0.852930000  | 4.440180000  |
| H | -1.361560000 | 1.938060000  | -4.022460000 |
| H | -3.226370000 | 1.774800000  | 2.883240000  |
| H | -3.234070000 | -1.767510000 | -2.880830000 |
| H | 5.061950000  | 0.875190000  | -2.664540000 |
| H | 4.859730000  | -1.000530000 | 2.899760000  |

|   |              |              |              |
|---|--------------|--------------|--------------|
| C | 0.355440000  | 2.153970000  | -1.998040000 |
| H | 1.254570000  | 1.889830000  | -2.573100000 |
| H | -0.046730000 | 3.107600000  | -2.378340000 |
| H | 0.633380000  | 2.279550000  | -0.941590000 |
| C | -1.855700000 | -2.208280000 | -0.618670000 |
| H | -2.275800000 | -1.887940000 | 0.342680000  |
| H | -2.520990000 | -2.964480000 | -1.068310000 |
| H | -0.866990000 | -2.666620000 | -0.449840000 |
| C | 0.357590000  | -2.153200000 | 2.008300000  |
| H | 1.274950000  | -1.883850000 | 2.549980000  |
| H | -0.041440000 | -3.095500000 | 2.420190000  |
| H | 0.603330000  | -2.304840000 | 0.946970000  |
| C | -1.853730000 | 2.211370000  | 0.618100000  |
| H | -0.867230000 | 2.673610000  | 0.450020000  |
| H | -2.270750000 | 1.889830000  | -0.343750000 |
| H | -2.521370000 | 2.967390000  | 1.065180000  |

## Coord\_2

|   |              |              |              |
|---|--------------|--------------|--------------|
| C | 0.000000000  | 0.000000000  | 0.000000000  |
| C | 1.371560000  | 0.000000000  | 0.000000000  |
| C | -0.786560000 | 0.000000000  | -1.254650000 |
| C | -1.853490000 | -0.905100000 | -1.438810000 |
| C | -0.474930000 | 0.917430000  | -2.281620000 |
| C | -2.621380000 | -0.855590000 | -2.610950000 |
| C | -1.256140000 | 0.954520000  | -3.448150000 |
| C | -2.330900000 | 0.086950000  | -3.608590000 |
| H | -2.942430000 | 0.130670000  | -4.517840000 |
| C | 2.161060000  | -0.491040000 | -1.145500000 |
| C | 1.673420000  | -1.540700000 | -1.936880000 |
| C | 3.414370000  | 0.070530000  | -1.439090000 |
| C | 2.423470000  | -2.010840000 | -2.999830000 |
| H | 0.693010000  | -1.972930000 | -1.717090000 |
| C | 4.150220000  | -0.399580000 | -2.510640000 |
| H | 3.803710000  | 0.883770000  | -0.817640000 |
| C | 3.663930000  | -1.446370000 | -3.296250000 |
| H | 2.042810000  | -2.834520000 | -3.616350000 |
| H | 4.252930000  | -1.821180000 | -4.139100000 |
| C | -0.688120000 | 0.164720000  | 1.310680000  |
| C | -0.545390000 | -0.830650000 | 2.302660000  |
| C | -1.545250000 | 1.259630000  | 1.550630000  |
| C | -1.268780000 | -0.729730000 | 3.502710000  |
| C | -2.263300000 | 1.335900000  | 2.753750000  |
| C | -2.126960000 | 0.340760000  | 3.723960000  |
| H | -1.155410000 | -1.506430000 | 4.268130000  |
| H | -2.695810000 | 0.405080000  | 4.660140000  |
| C | 2.179960000  | 0.481740000  | 1.145310000  |
| C | 1.901200000  | 1.729390000  | 1.722700000  |
| C | 3.246760000  | -0.288270000 | 1.623640000  |
| C | 2.686100000  | 2.190600000  | 2.773820000  |

|   |              |              |              |
|---|--------------|--------------|--------------|
| H | 1.062230000  | 2.327980000  | 1.357990000  |
| C | 4.016840000  | 0.177790000  | 2.682720000  |
| H | 3.464600000  | -1.258400000 | 1.167550000  |
| C | 3.740420000  | 1.420450000  | 3.255200000  |
| H | 2.469890000  | 3.164360000  | 3.226630000  |
| H | 4.354750000  | 1.787630000  | 4.085360000  |
| H | -1.014860000 | 1.674980000  | -4.238190000 |
| H | -2.935800000 | 2.183050000  | 2.931650000  |
| H | -3.453610000 | -1.556950000 | -2.743690000 |
| H | 5.125480000  | 0.045660000  | -2.743120000 |
| H | 4.844910000  | -0.427660000 | 3.067000000  |
| C | 0.700300000  | 1.839450000  | -2.213260000 |
| H | 1.542640000  | 1.369020000  | -2.741600000 |
| H | 0.461300000  | 2.798470000  | -2.702980000 |
| H | 1.000650000  | 2.034540000  | -1.173560000 |
| C | -2.175110000 | -1.948290000 | -0.418440000 |
| H | -2.577910000 | -1.472720000 | 0.484680000  |
| H | -2.921600000 | -2.657810000 | -0.814420000 |
| H | -1.261590000 | -2.507550000 | -0.158600000 |
| C | 0.367010000  | -2.004320000 | 2.143720000  |
| H | 1.343030000  | -1.757520000 | 2.585670000  |
| H | -0.051930000 | -2.882440000 | 2.663990000  |
| H | 0.509150000  | -2.252700000 | 1.082110000  |
| C | -1.697660000 | 2.372570000  | 0.563870000  |
| H | -0.718180000 | 2.847620000  | 0.388640000  |
| H | -2.086700000 | 1.984560000  | -0.384840000 |
| H | -2.392120000 | 3.137890000  | 0.950190000  |

### Coord\_3

|   |              |              |              |
|---|--------------|--------------|--------------|
| C | 0.000000000  | 0.000000000  | 0.000000000  |
| C | 1.380130000  | 0.000000000  | 0.000000000  |
| C | -0.783350000 | 0.000000000  | -1.255220000 |
| C | -1.971760000 | -0.754380000 | -1.365430000 |
| C | -0.324490000 | 0.730460000  | -2.373900000 |
| C | -2.716730000 | -0.723910000 | -2.552550000 |
| C | -1.081390000 | 0.753120000  | -3.556550000 |
| C | -2.277940000 | 0.050940000  | -3.645900000 |
| H | -2.869990000 | 0.086110000  | -4.568050000 |
| C | 2.151230000  | -0.754870000 | -1.007660000 |
| C | 1.573370000  | -1.873650000 | -1.622240000 |
| C | 3.456360000  | -0.368290000 | -1.357210000 |
| C | 2.286990000  | -2.585900000 | -2.570290000 |
| H | 0.554250000  | -2.166180000 | -1.355160000 |
| C | 4.156740000  | -1.079900000 | -2.313790000 |
| H | 3.915590000  | 0.499740000  | -0.872170000 |
| C | 3.580260000  | -2.197820000 | -2.922190000 |
| H | 1.835090000  | -3.461940000 | -3.051380000 |
| H | 4.140180000  | -2.765330000 | -3.672650000 |
| C | -0.590730000 | 0.334280000  | 1.333120000  |

|   |              |              |              |
|---|--------------|--------------|--------------|
| C | -0.455940000 | -0.588790000 | 2.395660000  |
| C | -1.367260000 | 1.498230000  | 1.524450000  |
| C | -1.098110000 | -0.343280000 | 3.621340000  |
| C | -2.009730000 | 1.717260000  | 2.753710000  |
| C | -1.872820000 | 0.796820000  | 3.798370000  |
| H | -0.990350000 | -1.063750000 | 4.440590000  |
| H | -2.379660000 | 0.974070000  | 4.755670000  |
| C | 2.214500000  | 0.713690000  | 0.998890000  |
| C | 2.004900000  | 2.080020000  | 1.239730000  |
| C | 3.236800000  | 0.035300000  | 1.673940000  |
| C | 2.814430000  | 2.749860000  | 2.148490000  |
| H | 1.199060000  | 2.610030000  | 0.725610000  |
| C | 4.033030000  | 0.713140000  | 2.587340000  |
| H | 3.394480000  | -1.031380000 | 1.488830000  |
| C | 3.827660000  | 2.073990000  | 2.821770000  |
| H | 2.650690000  | 3.816400000  | 2.338550000  |
| H | 4.462380000  | 2.606810000  | 3.538340000  |
| H | -0.723580000 | 1.331290000  | -4.416790000 |
| H | -2.619610000 | 2.617010000  | 2.893810000  |
| H | -3.643080000 | -1.306510000 | -2.625960000 |
| H | 5.172730000  | -0.773540000 | -2.589570000 |
| H | 4.826400000  | 0.181730000  | 3.124160000  |
| C | 0.985990000  | 1.450470000  | -2.389900000 |
| H | 1.737830000  | 0.792230000  | -2.850880000 |
| H | 0.907630000  | 2.375350000  | -2.986540000 |
| H | 1.321300000  | 1.707950000  | -1.374670000 |
| C | -2.450460000 | -1.623640000 | -0.248030000 |
| H | -2.811300000 | -1.000860000 | 0.580640000  |
| H | -3.272840000 | -2.274500000 | -0.592100000 |
| H | -1.623870000 | -2.258770000 | 0.108130000  |
| C | 0.355040000  | -1.838540000 | 2.278350000  |
| H | 1.378430000  | -1.635860000 | 2.627310000  |
| H | -0.085370000 | -2.635360000 | 2.901940000  |
| H | 0.394550000  | -2.181110000 | 1.234760000  |
| C | -1.514620000 | 2.538610000  | 0.461150000  |
| H | -0.539510000 | 3.020590000  | 0.278800000  |
| H | -1.874080000 | 2.084090000  | -0.469260000 |
| H | -2.231980000 | 3.313490000  | 0.780930000  |

#### Coord\_4

|   |              |              |              |
|---|--------------|--------------|--------------|
| C | 0.000000000  | 0.000000000  | 0.000000000  |
| C | 1.388690000  | 0.000000000  | 0.000000000  |
| C | -0.780150000 | 0.000000000  | -1.255780000 |
| C | -2.066690000 | -0.581170000 | -1.307230000 |
| C | -0.209620000 | 0.511990000  | -2.443230000 |
| C | -2.795290000 | -0.576100000 | -2.504480000 |
| C | -0.948870000 | 0.512110000  | -3.637060000 |
| C | -2.239730000 | -0.002150000 | -3.672290000 |
| H | -2.816660000 | 0.018370000  | -4.604160000 |

|   |              |              |              |
|---|--------------|--------------|--------------|
| C | 2.141200000  | -0.980750000 | -0.809250000 |
| C | 1.485830000  | -2.135410000 | -1.254240000 |
| C | 3.487830000  | -0.767800000 | -1.154040000 |
| C | 2.164950000  | -3.056450000 | -2.033810000 |
| H | 0.436720000  | -2.288600000 | -0.988610000 |
| C | 4.154790000  | -1.688280000 | -1.942160000 |
| H | 4.007230000  | 0.129530000  | -0.800280000 |
| C | 3.500340000  | -2.842900000 | -2.380080000 |
| H | 1.652220000  | -3.959850000 | -2.385550000 |
| H | 4.032450000  | -3.576290000 | -2.995470000 |
| C | -0.489210000 | 0.508870000  | 1.326320000  |
| C | -0.372420000 | -0.331100000 | 2.459500000  |
| C | -1.175090000 | 1.738800000  | 1.446780000  |
| C | -0.932350000 | 0.065710000  | 3.686410000  |
| C | -1.740920000 | 2.107830000  | 2.679010000  |
| C | -1.613280000 | 1.272210000  | 3.795920000  |
| H | -0.838080000 | -0.590500000 | 4.559460000  |
| H | -2.057410000 | 1.567910000  | 4.755410000  |
| C | 2.248780000  | 0.904810000  | 0.806790000  |
| C | 2.109300000  | 2.296460000  | 0.689580000  |
| C | 3.225120000  | 0.373650000  | 1.659340000  |
| C | 2.943000000  | 3.134830000  | 1.416330000  |
| H | 1.337710000  | 2.716550000  | 0.039830000  |
| C | 4.047190000  | 1.221570000  | 2.386540000  |
| H | 3.321410000  | -0.711380000 | 1.762710000  |
| C | 3.913970000  | 2.605940000  | 2.261630000  |
| H | 2.832470000  | 4.221420000  | 1.326860000  |
| H | 4.568800000  | 3.272200000  | 2.832930000  |
| H | -0.501420000 | 0.923310000  | -4.550240000 |
| H | -2.280520000 | 3.057720000  | 2.764090000  |
| H | -3.797380000 | -1.022080000 | -2.530560000 |
| H | 5.203060000  | -1.519360000 | -2.213250000 |
| H | 4.804740000  | 0.806800000  | 3.060480000  |
| C | 1.200820000  | 1.002570000  | -2.521180000 |
| H | 1.832100000  | 0.182480000  | -2.896730000 |
| H | 1.273820000  | 1.855420000  | -3.218100000 |
| H | 1.582240000  | 1.312210000  | -1.537200000 |
| C | -2.672340000 | -1.245010000 | -0.112920000 |
| H | -2.967850000 | -0.488800000 | 0.626210000  |
| H | -3.564250000 | -1.825470000 | -0.407440000 |
| H | -1.939840000 | -1.929670000 | 0.341880000  |
| C | 0.323690000  | -1.651900000 | 2.410970000  |
| H | 1.382170000  | -1.513370000 | 2.679200000  |
| H | -0.138870000 | -2.350120000 | 3.129830000  |
| H | 0.262890000  | -2.082390000 | 1.401970000  |
| C | -1.306910000 | 2.696810000  | 0.307160000  |
| H | -0.333870000 | 3.181130000  | 0.118300000  |
| H | -1.634540000 | 2.174430000  | -0.598800000 |
| H | -2.044040000 | 3.480090000  | 0.553080000  |



## Coord\_5

|   |              |              |              |
|---|--------------|--------------|--------------|
| C | 0.000000000  | 0.000000000  | 0.000000000  |
| C | 1.397250000  | 0.000000000  | 0.000000000  |
| C | -0.776940000 | 0.000000000  | -1.256330000 |
| C | -2.135270000 | -0.390560000 | -1.265860000 |
| C | -0.135240000 | 0.271450000  | -2.486910000 |
| C | -2.855200000 | -0.414890000 | -2.467750000 |
| C | -0.865190000 | 0.243790000  | -3.685960000 |
| C | -2.219890000 | -0.066150000 | -3.685650000 |
| H | -2.787350000 | -0.064480000 | -4.623290000 |
| C | 2.130960000  | -1.154850000 | -0.560580000 |
| C | 1.412190000  | -2.320260000 | -0.849390000 |
| C | 3.508150000  | -1.095170000 | -0.843620000 |
| C | 2.059610000  | -3.405720000 | -1.416620000 |
| H | 0.342040000  | -2.349710000 | -0.630970000 |
| C | 4.144400000  | -2.180740000 | -1.419160000 |
| H | 4.076970000  | -0.187970000 | -0.611210000 |
| C | 3.425830000  | -3.345690000 | -1.700100000 |
| H | 1.497600000  | -4.317980000 | -1.649650000 |
| H | 3.932090000  | -4.209340000 | -2.145630000 |
| C | -0.384070000 | 0.682920000  | 1.289600000  |
| C | -0.294280000 | -0.060930000 | 2.492090000  |
| C | -0.970460000 | 1.969920000  | 1.317080000  |
| C | -0.771330000 | 0.489660000  | 3.694960000  |
| C | -1.458860000 | 2.492160000  | 2.528020000  |
| C | -1.349510000 | 1.753220000  | 3.713980000  |
| H | -0.697550000 | -0.092580000 | 4.620790000  |
| H | -1.730490000 | 2.169600000  | 4.655990000  |
| C | 2.282770000  | 1.046440000  | 0.579810000  |
| C | 2.214050000  | 2.367320000  | 0.109160000  |
| C | 3.212060000  | 0.713280000  | 1.574220000  |
| C | 3.071460000  | 3.327110000  | 0.624920000  |
| H | 1.477600000  | 2.639430000  | -0.650430000 |
| C | 4.059610000  | 1.682360000  | 2.086030000  |
| H | 3.246140000  | -0.309910000 | 1.960890000  |
| C | 3.999250000  | 2.993000000  | 1.607200000  |
| H | 3.014600000  | 4.358860000  | 0.259400000  |
| H | 4.673890000  | 3.754850000  | 2.010200000  |
| H | -0.358820000 | 0.470410000  | -4.632680000 |
| H | -1.921430000 | 3.485200000  | 2.541040000  |
| H | -3.912170000 | -0.710390000 | -2.459870000 |
| H | 5.215990000  | -2.132810000 | -1.640650000 |
| H | 4.780460000  | 1.423060000  | 2.869180000  |
| C | 1.335890000  | 0.513690000  | -2.602210000 |
| H | 1.821400000  | -0.435870000 | -2.877520000 |
| H | 1.544650000  | 1.259820000  | -3.388950000 |
| H | 1.772630000  | 0.862520000  | -1.654950000 |
| C | -2.833110000 | -0.824870000 | -0.017360000 |
| H | -3.042210000 | 0.045630000  | 0.618810000  |

|   |              |              |              |
|---|--------------|--------------|--------------|
| H | -3.786980000 | -1.323510000 | -0.265400000 |
| H | -2.197180000 | -1.532630000 | 0.535350000  |
| C | 0.275400000  | -1.440360000 | 2.538610000  |
| H | 1.355950000  | -1.382990000 | 2.743480000  |
| H | -0.209050000 | -2.023050000 | 3.341420000  |
| H | 0.117930000  | -1.949460000 | 1.578290000  |
| C | -1.077200000 | 2.833690000  | 0.102350000  |
| H | -0.104570000 | 3.317220000  | -0.092270000 |
| H | -1.370240000 | 2.241210000  | -0.771470000 |
| H | -1.831550000 | 3.622120000  | 0.265990000  |

### Coord\_6

|   |              |              |              |
|---|--------------|--------------|--------------|
| C | 0.000000000  | 0.000000000  | 0.000000000  |
| C | 1.405820000  | 0.000000000  | 0.000000000  |
| C | -0.773740000 | 0.000000000  | -1.256870000 |
| C | -2.175230000 | -0.188140000 | -1.242520000 |
| C | -0.104480000 | 0.019200000  | -2.503320000 |
| C | -2.894860000 | -0.243280000 | -2.443200000 |
| C | -0.834530000 | -0.038170000 | -3.701110000 |
| C | -2.220560000 | -0.133990000 | -3.684850000 |
| H | -2.784950000 | -0.153110000 | -4.623890000 |
| C | 2.120530000  | -1.266100000 | -0.275070000 |
| C | 1.353630000  | -2.426080000 | -0.423360000 |
| C | 3.516810000  | -1.322250000 | -0.448940000 |
| C | 1.972940000  | -3.623300000 | -0.746050000 |
| H | 0.271510000  | -2.360970000 | -0.290290000 |
| C | 4.125680000  | -2.520570000 | -0.779210000 |
| H | 4.123450000  | -0.417810000 | -0.326160000 |
| C | 3.358280000  | -3.678660000 | -0.919440000 |
| H | 1.374170000  | -4.532990000 | -0.872410000 |
| H | 3.841270000  | -4.630350000 | -1.169700000 |
| C | -0.275870000 | 0.850820000  | 1.223360000  |
| C | -0.220740000 | 0.218150000  | 2.491480000  |
| C | -0.755220000 | 2.180140000  | 1.137360000  |
| C | -0.614570000 | 0.920670000  | 3.644900000  |
| C | -1.165600000 | 2.854650000  | 2.302340000  |
| C | -1.082500000 | 2.225900000  | 3.552290000  |
| H | -0.567290000 | 0.423700000  | 4.620730000  |
| H | -1.400090000 | 2.761840000  | 4.456930000  |
| C | 2.316470000  | 1.132700000  | 0.330310000  |
| C | 2.318800000  | 2.291270000  | -0.463240000 |
| C | 3.197970000  | 1.038530000  | 1.416010000  |
| C | 3.199400000  | 3.321060000  | -0.175680000 |
| H | 1.618130000  | 2.384150000  | -1.295840000 |
| C | 4.070560000  | 2.075650000  | 1.695690000  |
| H | 3.169410000  | 0.152860000  | 2.058410000  |
| C | 4.083430000  | 3.220240000  | 0.894790000  |
| H | 3.196450000  | 4.226580000  | -0.793600000 |
| H | 4.777540000  | 4.036390000  | 1.116020000  |

|   |              |              |              |
|---|--------------|--------------|--------------|
| H | -0.302470000 | -0.005940000 | -4.660680000 |
| H | -1.545400000 | 3.879350000  | 2.227530000  |
| H | -3.984000000 | -0.378920000 | -2.415700000 |
| H | 5.211230000  | -2.563750000 | -0.913860000 |
| H | 4.754120000  | 2.003120000  | 2.548770000  |
| C | 1.385470000  | 0.003450000  | -2.630130000 |
| H | 1.705870000  | -1.038030000 | -2.794210000 |
| H | 1.708740000  | 0.612790000  | -3.492880000 |
| H | 1.884300000  | 0.376340000  | -1.723500000 |
| C | -2.927120000 | -0.377080000 | 0.035690000  |
| H | -3.031900000 | 0.583860000  | 0.557740000  |
| H | -3.934080000 | -0.782980000 | -0.169690000 |
| H | -2.385750000 | -1.082570000 | 0.682760000  |
| C | 0.213030000  | -1.200380000 | 2.656500000  |
| H | 1.302150000  | -1.236820000 | 2.819750000  |
| H | -0.292090000 | -1.651670000 | 3.528510000  |
| H | -0.036320000 | -1.776540000 | 1.755850000  |
| C | -0.828500000 | 2.935830000  | -0.149430000 |
| H | 0.144600000  | 3.416900000  | -0.349400000 |
| H | -1.083930000 | 2.270660000  | -0.981470000 |
| H | -1.597870000 | 3.723410000  | -0.076900000 |

### Coord\_7

|   |              |              |              |
|---|--------------|--------------|--------------|
| C | 0.000000000  | 0.000000000  | 0.000000000  |
| C | 1.414380000  | 0.000000000  | 0.000000000  |
| C | -0.770540000 | 0.000000000  | -1.257400000 |
| C | -2.185120000 | 0.020130000  | -1.237820000 |
| C | -0.118640000 | -0.233870000 | -2.492060000 |
| C | -2.912980000 | -0.064510000 | -2.431450000 |
| C | -0.858390000 | -0.319410000 | -3.682030000 |
| C | -2.242190000 | -0.198170000 | -3.669770000 |
| H | -2.810190000 | -0.237660000 | -4.605750000 |
| C | 2.109910000  | -1.306890000 | 0.031420000  |
| C | 1.311090000  | -2.453440000 | 0.009650000  |
| C | 3.513460000  | -1.427990000 | -0.000400000 |
| C | 1.906590000  | -3.704370000 | -0.049160000 |
| H | 0.226080000  | -2.333550000 | 0.030760000  |
| C | 4.098800000  | -2.681070000 | -0.065460000 |
| H | 4.145600000  | -0.532780000 | 0.023330000  |
| C | 3.299030000  | -3.823620000 | -0.080030000 |
| H | 1.284350000  | -4.606350000 | -0.079190000 |
| H | 3.761930000  | -4.816970000 | -0.119930000 |
| C | -0.165210000 | 1.007080000  | 1.129090000  |
| C | -0.150880000 | 0.502220000  | 2.455890000  |
| C | -0.531340000 | 2.358550000  | 0.912150000  |
| C | -0.461360000 | 1.350540000  | 3.534930000  |
| C | -0.863280000 | 3.180230000  | 2.006740000  |
| C | -0.813110000 | 2.676470000  | 3.312900000  |
| H | -0.445410000 | 0.951330000  | 4.555570000  |

|   |             |             |             |
|---|-------------|-------------|-------------|
| H | -1.06720000 | 3.32753000  | 4.16061000  |
| C | 2.34987000  | 1.16069000  | 0.07150000  |
| C | 2.42321000  | 2.07696000  | -0.99066000 |
| C | 3.18319000  | 1.33242000  | 1.18592000  |
| C | 3.32645000  | 3.12388000  | -0.93631000 |
| H | 1.75872000  | 1.96939000  | -1.85035000 |
| C | 4.08035000  | 2.38329000  | 1.22949000  |
| H | 3.09195000  | 0.64916000  | 2.03626000  |
| C | 4.16641000  | 3.28159000  | 0.16253000  |
| H | 3.37738000  | 3.84067000  | -1.76449000 |
| H | 4.87962000  | 4.10967000  | 0.19838000  |
| H | -0.33500000 | -0.48315000 | -4.63336000 |
| H | -1.15563000 | 4.22089000  | 1.83072000  |
| H | -4.01040000 | -0.03566000 | -2.39919000 |
| H | 5.18867000  | -2.77501000 | -0.08767000 |
| H | 4.72627000  | 2.51799000  | 2.10413000  |
| C | 1.34725000  | -0.50763000 | -2.60427000 |
| H | 1.48985000  | -1.59981000 | -2.65036000 |
| H | 1.75902000  | -0.05932000 | -3.52646000 |
| H | 1.91212000  | -0.12737000 | -1.74036000 |
| C | -2.95096000 | 0.08358000  | 0.04469000  |
| H | -2.93746000 | 1.10726000  | 0.44413000  |
| H | -4.00071000 | -0.21934000 | -0.12266000 |
| H | -2.49799000 | -0.59638000 | 0.77998000  |
| C | 0.13973000  | -0.92952000 | 2.75818000  |
| H | 1.22375000  | -1.06697000 | 2.90484000  |
| H | -0.38390000 | -1.23539000 | 3.68119000  |
| H | -0.19564000 | -1.55991000 | 1.92480000  |
| C | -0.56410000 | 2.99064000  | -0.44093000 |
| H | 0.40949000  | 3.46894000  | -0.64670000 |
| H | -0.77890000 | 2.25068000  | -1.21926000 |
| H | -1.34649000 | 3.76826000  | -0.46791000 |

### Coord\_8

|   |             |             |             |
|---|-------------|-------------|-------------|
| C | 0.00000000  | 0.00000000  | 0.00000000  |
| C | 1.42294000  | 0.00000000  | 0.00000000  |
| C | -0.76734000 | 0.00000000  | -1.25793000 |
| C | -2.16442000 | 0.22811000  | -1.25185000 |
| C | -0.17705000 | -0.47686000 | -2.45389000 |
| C | -2.90860000 | 0.11795000  | -2.43290000 |
| C | -0.93552000 | -0.58556000 | -3.62995000 |
| C | -2.28353000 | -0.25129000 | -3.64138000 |
| H | -2.86149000 | -0.30833000 | -4.57008000 |
| C | 2.09910000  | -1.27362000 | 0.34155000  |
| C | 1.28527000  | -2.40463000 | 0.43707000  |
| C | 3.49789000  | -1.40051000 | 0.46641000  |
| C | 1.86186000  | -3.64874000 | 0.64810000  |
| H | 0.20634000  | -2.27625000 | 0.33390000  |
| C | 4.06397000  | -2.64758000 | 0.67304000  |

|   |              |              |              |
|---|--------------|--------------|--------------|
| H | 4.142710000  | -0.516430000 | 0.398120000  |
| C | 3.249230000  | -3.772330000 | 0.773680000  |
| H | 1.230000000  | -4.542300000 | 0.708170000  |
| H | 3.695680000  | -4.759080000 | 0.948490000  |
| C | -0.052680000 | 1.146620000  | 1.009290000  |
| C | -0.083630000 | 0.786920000  | 2.383780000  |
| C | -0.300890000 | 2.495320000  | 0.648340000  |
| C | -0.310770000 | 1.770760000  | 3.364690000  |
| C | -0.554040000 | 3.454970000  | 1.649020000  |
| C | -0.542020000 | 3.091630000  | 3.000140000  |
| H | -0.329710000 | 1.482380000  | 4.421900000  |
| H | -0.732570000 | 3.850090000  | 3.772170000  |
| C | 2.382950000  | 1.130620000  | -0.183270000 |
| C | 2.526920000  | 1.742210000  | -1.440020000 |
| C | 3.168060000  | 1.577580000  | 0.889520000  |
| C | 3.452240000  | 2.754790000  | -1.611980000 |
| H | 1.898780000  | 1.425610000  | -2.274750000 |
| C | 4.089240000  | 2.589760000  | 0.705400000  |
| H | 3.014520000  | 1.145550000  | 1.883670000  |
| C | 4.248110000  | 3.179860000  | -0.551760000 |
| H | 3.556780000  | 3.233980000  | -2.592880000 |
| H | 4.980020000  | 3.978770000  | -0.695270000 |
| H | -0.454850000 | -0.938570000 | -4.552440000 |
| H | -0.755440000 | 4.492260000  | 1.361820000  |
| H | -3.989930000 | 0.310970000  | -2.410850000 |
| H | 5.148410000  | -2.745570000 | 0.774410000  |
| H | 4.697450000  | 2.938740000  | 1.547260000  |
| C | 1.222450000  | -0.998970000 | -2.526090000 |
| H | 1.181760000  | -2.098620000 | -2.451920000 |
| H | 1.693070000  | -0.729100000 | -3.489180000 |
| H | 1.854210000  | -0.628800000 | -1.705090000 |
| C | -2.903490000 | 0.541900000  | 0.009570000  |
| H | -2.762370000 | 1.597760000  | 0.280910000  |
| H | -3.984260000 | 0.351200000  | -0.125260000 |
| H | -2.529190000 | -0.092330000 | 0.824740000  |
| C | 0.058920000  | -0.627000000 | 2.835820000  |
| H | 1.124240000  | -0.866370000 | 2.992770000  |
| H | -0.480160000 | -0.776120000 | 3.788360000  |
| H | -0.355780000 | -1.298460000 | 2.073810000  |
| C | -0.287550000 | 2.987300000  | -0.761760000 |
| H | 0.685760000  | 3.463510000  | -0.975160000 |
| H | -0.458970000 | 2.171820000  | -1.472120000 |
| H | -1.080990000 | 3.742440000  | -0.895210000 |

#### Coord\_9

|   |              |             |              |
|---|--------------|-------------|--------------|
| C | 0.000000000  | 0.000000000 | 0.000000000  |
| C | 1.431510000  | 0.000000000 | 0.000000000  |
| C | -0.764140000 | 0.000000000 | -1.258450000 |
| C | -2.113480000 | 0.429670000 | -1.284130000 |

|   |              |              |              |
|---|--------------|--------------|--------------|
| C | -0.277150000 | -0.699280000 | -2.390760000 |
| C | -2.881140000 | 0.300470000  | -2.447740000 |
| C | -1.062000000 | -0.822990000 | -3.547710000 |
| C | -2.341660000 | -0.286500000 | -3.601620000 |
| H | -2.935100000 | -0.356100000 | -4.519380000 |
| C | 2.088100000  | -1.166920000 | 0.637460000  |
| C | 1.276590000  | -2.282860000 | 0.847740000  |
| C | 3.470010000  | -1.238290000 | 0.913470000  |
| C | 1.839630000  | -3.459940000 | 1.321190000  |
| H | 0.212510000  | -2.193970000 | 0.623670000  |
| C | 4.021460000  | -2.418720000 | 1.384740000  |
| H | 4.114370000  | -0.365190000 | 0.755190000  |
| C | 3.209740000  | -3.526440000 | 1.596850000  |
| H | 1.212330000  | -4.345990000 | 1.470670000  |
| H | 3.643810000  | -4.458780000 | 1.980040000  |
| C | 0.061110000  | 1.264880000  | 0.867430000  |
| C | -0.017820000 | 1.067330000  | 2.273980000  |
| C | -0.066000000 | 2.582210000  | 0.354910000  |
| C | -0.161730000 | 2.172470000  | 3.134810000  |
| C | -0.240110000 | 3.666700000  | 1.239710000  |
| C | -0.269810000 | 3.458870000  | 2.620500000  |
| H | -0.217740000 | 2.007800000  | 4.216860000  |
| H | -0.396840000 | 4.313940000  | 3.299420000  |
| C | 2.415700000  | 1.045710000  | -0.421210000 |
| C | 2.629610000  | 1.312670000  | -1.784390000 |
| C | 3.152930000  | 1.757520000  | 0.536960000  |
| C | 3.576410000  | 2.243400000  | -2.164720000 |
| H | 2.037730000  | 0.792780000  | -2.539620000 |
| C | 4.097520000  | 2.683170000  | 0.144850000  |
| H | 2.937820000  | 1.605420000  | 1.599730000  |
| C | 4.328460000  | 2.926320000  | -1.212630000 |
| H | 3.734040000  | 2.453510000  | -3.229700000 |
| H | 5.078630000  | 3.658320000  | -1.520590000 |
| H | -0.656330000 | -1.350580000 | -4.422110000 |
| H | -0.348200000 | 4.678470000  | 0.835690000  |
| H | -3.922280000 | 0.652390000  | -2.450480000 |
| H | 5.090690000  | -2.472570000 | 1.604940000  |
| H | 4.668200000  | 3.238370000  | 0.897570000  |
| C | 1.015810000  | -1.450740000 | -2.399190000 |
| H | 0.793710000  | -2.514320000 | -2.207030000 |
| H | 1.513200000  | -1.369230000 | -3.383400000 |
| H | 1.712060000  | -1.108120000 | -1.619330000 |
| C | -2.785990000 | 0.982730000  | -0.068320000 |
| H | -2.512910000 | 2.038510000  | 0.072680000  |
| H | -3.884490000 | 0.912150000  | -0.176960000 |
| H | -2.477720000 | 0.410650000  | 0.816670000  |
| C | -0.025850000 | -0.294210000 | 2.880670000  |
| H | 1.007530000  | -0.629640000 | 3.075070000  |
| H | -0.576460000 | -0.278750000 | 3.838400000  |
| H | -0.512500000 | -0.994180000 | 2.190880000  |

|   |              |             |              |
|---|--------------|-------------|--------------|
| C | -0.002560000 | 2.917420000 | -1.098840000 |
| H | 0.969010000  | 3.392710000 | -1.323440000 |
| H | -0.128350000 | 2.028130000 | -1.724800000 |
| H | -0.805080000 | 3.634330000 | -1.343130000 |

Coord\_10

|   |              |              |              |
|---|--------------|--------------|--------------|
| C | 0.000000000  | 0.000000000  | 0.000000000  |
| C | 1.440070000  | 0.000000000  | 0.000000000  |
| C | -0.760940000 | 0.000000000  | -1.258960000 |
| C | -2.033550000 | 0.618840000  | -1.333660000 |
| C | -0.414550000 | -0.891540000 | -2.305660000 |
| C | -2.830400000 | 0.479280000  | -2.475880000 |
| C | -1.231390000 | -1.019430000 | -3.439620000 |
| C | -2.412160000 | -0.298070000 | -3.553320000 |
| H | -3.025270000 | -0.373330000 | -4.457330000 |
| C | 2.076930000  | -0.991740000 | 0.901820000  |
| C | 1.285180000  | -2.091790000 | 1.231350000  |
| C | 3.429930000  | -0.950600000 | 1.303460000  |
| C | 1.840360000  | -3.144590000 | 1.946880000  |
| H | 0.244440000  | -2.087120000 | 0.905240000  |
| C | 3.971580000  | -2.006660000 | 2.019160000  |
| H | 4.060560000  | -0.089190000 | 1.051850000  |
| C | 3.181140000  | -3.097250000 | 2.346170000  |
| H | 1.231880000  | -4.022580000 | 2.190740000  |
| H | 3.607170000  | -3.929890000 | 2.921210000  |
| C | 0.175520000  | 1.358040000  | 0.707800000  |
| C | 0.047750000  | 1.338020000  | 2.125900000  |
| C | 0.171140000  | 2.613020000  | 0.042580000  |
| C | -0.013060000 | 2.546580000  | 2.847100000  |
| C | 0.076320000  | 3.805530000  | 0.791680000  |
| C | 0.003010000  | 3.766850000  | 2.182520000  |
| H | -0.106900000 | 2.517270000  | 3.938560000  |
| H | -0.060490000 | 4.704750000  | 2.752680000  |
| C | 2.448120000  | 0.911920000  | -0.630780000 |
| C | 2.730930000  | 0.819750000  | -2.004780000 |
| C | 3.138110000  | 1.857910000  | 0.142840000  |
| C | 3.698610000  | 1.627410000  | -2.565950000 |
| H | 2.175020000  | 0.117290000  | -2.627590000 |
| C | 4.105460000  | 2.656120000  | -0.427920000 |
| H | 2.862560000  | 1.991990000  | 1.194180000  |
| C | 4.407370000  | 2.539730000  | -1.788750000 |
| H | 3.908570000  | 1.556720000  | -3.640450000 |
| H | 5.175330000  | 3.172280000  | -2.238650000 |
| H | -0.929850000 | -1.699570000 | -4.248860000 |
| H | 0.062660000  | 4.767830000  | 0.270170000  |
| H | -3.808260000 | 0.980020000  | -2.517210000 |
| H | 5.015940000  | -1.971810000 | 2.337750000  |
| H | 4.639050000  | 3.393910000  | 0.181630000  |
| C | 0.735360000  | -1.844660000 | -2.229110000 |

|   |              |              |              |
|---|--------------|--------------|--------------|
| H | 0.341110000  | -2.830050000 | -1.925660000 |
| H | 1.226400000  | -1.953580000 | -3.214300000 |
| H | 1.490520000  | -1.546250000 | -1.486690000 |
| C | -2.602050000 | 1.391520000  | -0.186210000 |
| H | -2.197940000 | 2.414450000  | -0.174510000 |
| H | -3.703500000 | 1.447230000  | -0.275820000 |
| H | -2.345100000 | 0.893640000  | 0.757350000  |
| C | -0.110960000 | 0.064980000  | 2.883660000  |
| H | 0.877860000  | -0.353820000 | 3.141270000  |
| H | -0.668370000 | 0.248600000  | 3.819990000  |
| H | -0.661680000 | -0.652330000 | 2.264100000  |
| C | 0.287030000  | 2.775790000  | -1.436960000 |
| H | 1.254900000  | 3.251050000  | -1.678430000 |
| H | 0.208390000  | 1.817840000  | -1.960540000 |
| H | -0.522600000 | 3.435840000  | -1.792740000 |

S<sub>0</sub>-S<sub>1</sub>S<sub>0</sub>-pyr(C2)

Coord\_1

|   |              |              |              |
|---|--------------|--------------|--------------|
| C | 0.000000000  | 0.000000000  | 0.000000000  |
| C | 1.363000000  | 0.000000000  | 0.000000000  |
| C | -0.789760000 | 0.000000000  | -1.254080000 |
| C | -1.715610000 | -1.028920000 | -1.525220000 |
| C | -0.654530000 | 1.064840000  | -2.170140000 |
| C | -2.511350000 | -0.968720000 | -2.678500000 |
| C | -1.464390000 | 1.105990000  | -3.316990000 |
| C | -2.393720000 | 0.101020000  | -3.563320000 |
| H | -3.027440000 | 0.145700000  | -4.457450000 |
| C | 2.170680000  | -0.205010000 | -1.216140000 |
| C | 1.784440000  | -1.146560000 | -2.181910000 |
| C | 3.362600000  | 0.513950000  | -1.395350000 |
| C | 2.571940000  | -1.354700000 | -3.299100000 |
| H | 0.851070000  | -1.703560000 | -2.056320000 |
| C | 4.135290000  | 0.304630000  | -2.521670000 |
| H | 3.673490000  | 1.242630000  | -0.639700000 |
| C | 3.749590000  | -0.631160000 | -3.481050000 |
| H | 2.271630000  | -2.096340000 | -4.049830000 |
| H | 4.368240000  | -0.797160000 | -4.367940000 |
| C | -0.780850000 | 0.005490000  | 1.260730000  |
| C | -0.641110000 | -1.053520000 | 2.182740000  |
| C | -1.707510000 | 1.033850000  | 1.528270000  |
| C | -1.444240000 | -1.086340000 | 3.334320000  |
| C | -2.499770000 | 0.978410000  | 2.683810000  |
| C | -2.374370000 | -0.082820000 | 3.577680000  |
| H | -1.333780000 | -1.912850000 | 4.046220000  |
| H | -3.004200000 | -0.122780000 | 4.475070000  |
| C | 2.145150000  | 0.219970000  | 1.237400000  |



|   |              |              |              |
|---|--------------|--------------|--------------|
| C | 1.798560000  | 1.265310000  | 2.105620000  |
| C | 3.254650000  | -0.586170000 | 1.516190000  |
| C | 2.558410000  | 1.487290000  | 3.250490000  |
| H | 0.927800000  | 1.891420000  | 1.892140000  |
| C | 3.998360000  | -0.363710000 | 2.670960000  |
| H | 3.531030000  | -1.389890000 | 0.827760000  |
| C | 3.652340000  | 0.675920000  | 3.535380000  |
| H | 2.290700000  | 2.303100000  | 3.930450000  |
| H | 4.246060000  | 0.852930000  | 4.440180000  |
| H | -1.361560000 | 1.938060000  | -4.022460000 |
| H | -3.226370000 | 1.774800000  | 2.883240000  |
| H | -3.234070000 | -1.767510000 | -2.880830000 |
| H | 5.061950000  | 0.875190000  | -2.664540000 |
| H | 4.859730000  | -1.000530000 | 2.899760000  |
| C | 0.355440000  | 2.153970000  | -1.998040000 |
| H | 1.254570000  | 1.889830000  | -2.573100000 |
| H | -0.046730000 | 3.107600000  | -2.378340000 |
| H | 0.633380000  | 2.279550000  | -0.941590000 |
| C | -1.855700000 | -2.208280000 | -0.618670000 |
| H | -2.275800000 | -1.887940000 | 0.342680000  |
| H | -2.520990000 | -2.964480000 | -1.068310000 |
| H | -0.866990000 | -2.666620000 | -0.449840000 |
| C | 0.357590000  | -2.153200000 | 2.008300000  |
| H | 1.274950000  | -1.883850000 | 2.549980000  |
| H | -0.041440000 | -3.095500000 | 2.420190000  |
| H | 0.603330000  | -2.304840000 | 0.946970000  |
| C | -1.853730000 | 2.211370000  | 0.618100000  |
| H | -0.867230000 | 2.673610000  | 0.450020000  |
| H | -2.270750000 | 1.889830000  | -0.343750000 |
| H | -2.521370000 | 2.967390000  | 1.065180000  |

## Coord\_2

|   |              |              |              |
|---|--------------|--------------|--------------|
| C | 0.000000000  | 0.000000000  | 0.000000000  |
| C | 1.372460000  | 0.000000000  | 0.000000000  |
| C | -0.779240000 | 0.000000000  | -1.258880000 |
| C | -1.791790000 | -0.959510000 | -1.487880000 |
| C | -0.539560000 | 0.989610000  | -2.239200000 |
| C | -2.574680000 | -0.888890000 | -2.647570000 |
| C | -1.339860000 | 1.039820000  | -3.391950000 |
| C | -2.360930000 | 0.116720000  | -3.587470000 |
| H | -2.988570000 | 0.171130000  | -4.485360000 |
| C | 2.169300000  | -0.502190000 | -1.135670000 |
| C | 1.641210000  | -1.489210000 | -1.982560000 |
| C | 3.453150000  | 0.007060000  | -1.384960000 |
| C | 2.386750000  | -1.963760000 | -3.046720000 |
| H | 0.630530000  | -1.871720000 | -1.807860000 |
| C | 4.189090000  | -0.457220000 | -2.459740000 |
| H | 3.866690000  | 0.778680000  | -0.727620000 |
| C | 3.662410000  | -1.461060000 | -3.298110000 |

|   |              |              |              |
|---|--------------|--------------|--------------|
| H | 1.973250000  | -2.742180000 | -3.700560000 |
| H | 4.247230000  | -1.836140000 | -4.143280000 |
| C | -0.794190000 | 0.032850000  | 1.255000000  |
| C | -0.688610000 | -1.017260000 | 2.191860000  |
| C | -1.687290000 | 1.095410000  | 1.505690000  |
| C | -1.485850000 | -1.002510000 | 3.348300000  |
| C | -2.472980000 | 1.088310000  | 2.667940000  |
| C | -2.375870000 | 0.039510000  | 3.581840000  |
| H | -1.400520000 | -1.821070000 | 4.072400000  |
| H | -2.998930000 | 0.038230000  | 4.484790000  |
| C | 2.077660000  | 0.381520000  | 1.253770000  |
| C | 1.747790000  | 1.586720000  | 1.891070000  |
| C | 3.108190000  | -0.420770000 | 1.760090000  |
| C | 2.442870000  | 1.973600000  | 3.031500000  |
| H | 0.940390000  | 2.211270000  | 1.499250000  |
| C | 3.789580000  | -0.030130000 | 2.906910000  |
| H | 3.370170000  | -1.353960000 | 1.253260000  |
| C | 3.458630000  | 1.170290000  | 3.542480000  |
| H | 2.187890000  | 2.914840000  | 3.530780000  |
| H | 4.000930000  | 1.477730000  | 4.444380000  |
| H | -1.154850000 | 1.814310000  | -4.144060000 |
| H | -3.170660000 | 1.912580000  | 2.855940000  |
| H | -3.364300000 | -1.630220000 | -2.814700000 |
| H | 5.189900000  | -0.050520000 | -2.654830000 |
| H | 4.588820000  | -0.660580000 | 3.311730000  |
| C | 0.571280000  | 1.984600000  | -2.130050000 |
| H | 1.423390000  | 1.617650000  | -2.721060000 |
| H | 0.248110000  | 2.957470000  | -2.536990000 |
| H | 0.881810000  | 2.110640000  | -1.082510000 |
| C | -2.038800000 | -2.086690000 | -0.537700000 |
| H | -2.466620000 | -1.698240000 | 0.394150000  |
| H | -2.740200000 | -2.814830000 | -0.979030000 |
| H | -1.091260000 | -2.603420000 | -0.316620000 |
| C | 0.258880000  | -2.161340000 | 2.021510000  |
| H | 1.200930000  | -1.917880000 | 2.531130000  |
| H | -0.167500000 | -3.075400000 | 2.468220000  |
| H | 0.468480000  | -2.351010000 | 0.958070000  |
| C | -1.806580000 | 2.261170000  | 0.576700000  |
| H | -0.830070000 | 2.764530000  | 0.488860000  |
| H | -2.128520000 | 1.923710000  | -0.415870000 |
| H | -2.540790000 | 2.988340000  | 0.963690000  |

### Coord\_3

|   |              |              |              |
|---|--------------|--------------|--------------|
| C | 0.000000000  | 0.000000000  | 0.000000000  |
| C | 1.381920000  | 0.000000000  | 0.000000000  |
| C | -0.768680000 | 0.000000000  | -1.263590000 |
| C | -1.862240000 | -0.880110000 | -1.455710000 |
| C | -0.431520000 | 0.901540000  | -2.301780000 |
| C | -2.630890000 | -0.799220000 | -2.622460000 |

|   |              |              |              |
|---|--------------|--------------|--------------|
| C | -1.221210000 | 0.961240000  | -3.460930000 |
| C | -2.326220000 | 0.132050000  | -3.612360000 |
| H | -2.946430000 | 0.197010000  | -4.514700000 |
| C | 2.167830000  | -0.772070000 | -0.983190000 |
| C | 1.535730000  | -1.775370000 | -1.735530000 |
| C | 3.518690000  | -0.475480000 | -1.222000000 |
| C | 2.246000000  | -2.488250000 | -2.685630000 |
| H | 0.471810000  | -1.982850000 | -1.579130000 |
| C | 4.226630000  | -1.171130000 | -2.186430000 |
| H | 4.009620000  | 0.316710000  | -0.647730000 |
| C | 3.590990000  | -2.208380000 | -2.921570000 |
| H | 1.748070000  | -3.279110000 | -3.261510000 |
| H | 4.147890000  | -2.770360000 | -3.677350000 |
| C | -0.807500000 | 0.059950000  | 1.248540000  |
| C | -0.736060000 | -0.980450000 | 2.199590000  |
| C | -1.666180000 | 1.155040000  | 1.482400000  |
| C | -1.526240000 | -0.919230000 | 3.359750000  |
| C | -2.443790000 | 1.195110000  | 2.650330000  |
| C | -2.374960000 | 0.159360000  | 3.582990000  |
| H | -1.465930000 | -1.729300000 | 4.095480000  |
| H | -2.990210000 | 0.195780000  | 4.490540000  |
| C | 2.006480000  | 0.547980000  | 1.244210000  |
| C | 1.710180000  | 1.863080000  | 1.632790000  |
| C | 2.942500000  | -0.202670000 | 1.969420000  |
| C | 2.342490000  | 2.411730000  | 2.741210000  |
| H | 0.978380000  | 2.448350000  | 1.069670000  |
| C | 3.563670000  | 0.351760000  | 3.080650000  |
| H | 3.176490000  | -1.225100000 | 1.659110000  |
| C | 3.265190000  | 1.663290000  | 3.468260000  |
| H | 2.113510000  | 3.439220000  | 3.045720000  |
| H | 3.757520000  | 2.099050000  | 4.345350000  |
| H | -0.959310000 | 1.668410000  | -4.254780000 |
| H | -3.111760000 | 2.045840000  | 2.826840000  |
| H | -3.482450000 | -1.475200000 | -2.758800000 |
| H | 5.281860000  | -0.930260000 | -2.370780000 |
| H | 4.289140000  | -0.235910000 | 3.654020000  |
| C | 0.771290000  | 1.788270000  | -2.247980000 |
| H | 1.566970000  | 1.323350000  | -2.849580000 |
| H | 0.531210000  | 2.774190000  | -2.681060000 |
| H | 1.110840000  | 1.907470000  | -1.208420000 |
| C | -2.213250000 | -1.944810000 | -0.465980000 |
| H | -2.643560000 | -1.487970000 | 0.432550000  |
| H | -2.948520000 | -2.643340000 | -0.900350000 |
| H | -1.312180000 | -2.513680000 | -0.190710000 |
| C | 0.158500000  | -2.166450000 | 2.034060000  |
| H | 1.123140000  | -1.951580000 | 2.512220000  |
| H | -0.293300000 | -3.051000000 | 2.514050000  |
| H | 0.330460000  | -2.390950000 | 0.970180000  |
| C | -1.758970000 | 2.308810000  | 0.535660000  |
| H | -0.801740000 | 2.854550000  | 0.525130000  |

|   |              |             |              |
|---|--------------|-------------|--------------|
| H | -1.983420000 | 1.957780000 | -0.478930000 |
| H | -2.554120000 | 3.003310000 | 0.857250000  |

Coord\_4

|   |              |              |              |
|---|--------------|--------------|--------------|
| C | 0.000000000  | 0.000000000  | 0.000000000  |
| C | 1.391380000  | 0.000000000  | 0.000000000  |
| C | -0.758100000 | 0.000000000  | -1.268220000 |
| C | -1.926010000 | -0.791530000 | -1.429090000 |
| C | -0.331740000 | 0.801760000  | -2.357330000 |
| C | -2.679030000 | -0.700730000 | -2.603530000 |
| C | -1.109660000 | 0.871230000  | -3.523430000 |
| C | -2.289550000 | 0.146740000  | -3.637950000 |
| H | -2.900820000 | 0.222840000  | -4.545510000 |
| C | 2.166280000  | -0.997360000 | -0.767290000 |
| C | 1.473170000  | -2.007610000 | -1.455090000 |
| C | 3.557330000  | -0.887730000 | -0.918330000 |
| C | 2.158360000  | -2.919350000 | -2.240260000 |
| H | 0.381450000  | -2.064100000 | -1.380850000 |
| C | 4.247990000  | -1.779690000 | -1.721790000 |
| H | 4.097260000  | -0.084290000 | -0.407290000 |
| C | 3.542510000  | -2.833630000 | -2.379920000 |
| H | 1.608790000  | -3.713850000 | -2.762190000 |
| H | 4.080180000  | -3.551610000 | -3.006620000 |
| C | -0.820770000 | 0.086780000  | 1.241360000  |
| C | -0.783460000 | -0.943160000 | 2.205890000  |
| C | -1.644260000 | 1.212700000  | 1.458510000  |
| C | -1.565440000 | -0.836620000 | 3.368730000  |
| C | -2.412340000 | 1.298670000  | 2.631190000  |
| C | -2.371790000 | 0.276550000  | 3.581310000  |
| H | -1.530050000 | -1.637710000 | 4.115500000  |
| H | -2.978220000 | 0.349610000  | 4.492550000  |
| C | 1.931920000  | 0.714780000  | 1.207920000  |
| C | 1.684840000  | 2.089530000  | 1.342560000  |
| C | 2.759070000  | 0.059420000  | 2.132770000  |
| C | 2.256560000  | 2.791970000  | 2.393840000  |
| H | 1.039850000  | 2.601270000  | 0.623570000  |
| C | 3.322210000  | 0.768600000  | 3.183500000  |
| H | 2.952400000  | -1.011650000 | 2.023610000  |
| C | 3.072620000  | 2.140660000  | 3.316860000  |
| H | 2.065920000  | 3.866250000  | 2.499410000  |
| H | 3.516550000  | 2.698750000  | 4.149040000  |
| H | -0.777170000 | 1.502200000  | -4.353700000 |
| H | -3.049880000 | 2.174430000  | 2.796210000  |
| H | -3.586810000 | -1.304190000 | -2.713750000 |
| H | 5.336110000  | -1.684080000 | -1.834940000 |
| H | 3.963200000  | 0.256750000  | 3.910030000  |
| C | 0.952600000  | 1.567540000  | -2.350700000 |
| H | 1.683060000  | 1.010940000  | -2.958070000 |
| H | 0.799260000  | 2.559660000  | -2.809090000 |

|   |              |              |              |
|---|--------------|--------------|--------------|
| H | 1.316550000  | 1.673350000  | -1.317700000 |
| C | -2.377160000 | -1.783820000 | -0.404310000 |
| H | -2.804470000 | -1.258850000 | 0.457110000  |
| H | -3.144080000 | -2.451380000 | -0.832970000 |
| H | -1.527370000 | -2.398000000 | -0.073380000 |
| C | 0.056590000  | -2.168490000 | 2.045780000  |
| H | 1.041660000  | -1.984700000 | 2.493150000  |
| H | -0.418650000 | -3.022480000 | 2.557480000  |
| H | 0.189680000  | -2.424480000 | 0.982970000  |
| C | -1.710960000 | 2.354350000  | 0.495090000  |
| H | -0.782040000 | 2.943340000  | 0.558130000  |
| H | -1.836380000 | 1.992540000  | -0.532830000 |
| H | -2.560830000 | 3.012280000  | 0.746670000  |

### Coord\_5

|   |              |              |              |
|---|--------------|--------------|--------------|
| C | 0.000000000  | 0.000000000  | 0.000000000  |
| C | 1.400840000  | 0.000000000  | 0.000000000  |
| C | -0.747500000 | 0.000000000  | -1.272760000 |
| C | -1.982210000 | -0.694660000 | -1.408310000 |
| C | -0.241450000 | 0.691570000  | -2.405410000 |
| C | -2.718230000 | -0.594530000 | -2.591000000 |
| C | -1.006360000 | 0.770930000  | -3.579030000 |
| C | -2.250920000 | 0.160530000  | -3.664180000 |
| H | -2.851610000 | 0.248100000  | -4.577750000 |
| C | 2.164640000  | -1.163360000 | -0.500670000 |
| C | 1.456830000  | -2.190460000 | -1.148780000 |
| C | 3.567940000  | -1.189000000 | -0.500190000 |
| C | 2.129790000  | -3.253290000 | -1.729010000 |
| H | 0.363320000  | -2.141730000 | -1.208030000 |
| C | 4.253350000  | -2.232940000 | -1.101390000 |
| H | 4.126410000  | -0.370630000 | -0.034950000 |
| C | 3.522350000  | -3.305680000 | -1.706670000 |
| H | 1.564020000  | -4.057930000 | -2.217610000 |
| H | 4.051520000  | -4.142360000 | -2.172980000 |
| C | -0.834020000 | 0.113310000  | 1.233470000  |
| C | -0.830750000 | -0.905440000 | 2.210750000  |
| C | -1.621580000 | 1.268370000  | 1.434120000  |
| C | -1.603490000 | -0.754830000 | 3.375290000  |
| C | -2.378780000 | 1.398870000  | 2.610680000  |
| C | -2.366500000 | 0.390920000  | 3.576970000  |
| H | -1.592910000 | -1.546480000 | 4.132500000  |
| H | -2.963170000 | 0.499480000  | 4.491090000  |
| C | 1.854290000  | 0.877250000  | 1.144930000  |
| C | 1.670440000  | 2.264120000  | 1.032180000  |
| C | 2.559740000  | 0.354390000  | 2.241040000  |
| C | 2.183660000  | 3.108470000  | 2.004390000  |
| H | 1.122170000  | 2.673350000  | 0.179860000  |
| C | 3.066870000  | 1.205600000  | 3.209720000  |
| H | 2.701010000  | -0.726830000 | 2.327990000  |

|   |              |              |              |
|---|--------------|--------------|--------------|
| C | 2.881040000  | 2.589910000  | 3.094730000  |
| H | 2.042460000  | 4.192220000  | 1.916100000  |
| H | 3.278150000  | 3.261170000  | 3.864350000  |
| H | -0.610510000 | 1.317770000  | -4.440080000 |
| H | -2.985260000 | 2.298200000  | 2.764320000  |
| H | -3.675810000 | -1.119100000 | -2.679990000 |
| H | 5.351640000  | -2.241520000 | -1.093580000 |
| H | 3.613830000  | 0.797600000  | 4.067250000  |
| C | 1.112570000  | 1.325320000  | -2.437280000 |
| H | 1.769870000  | 0.684620000  | -3.046280000 |
| H | 1.049080000  | 2.316170000  | -2.919830000 |
| H | 1.495340000  | 1.412130000  | -1.409060000 |
| C | -2.528720000 | -1.605040000 | -0.353370000 |
| H | -2.947290000 | -1.012880000 | 0.467200000  |
| H | -3.325070000 | -2.240520000 | -0.777460000 |
| H | -1.734450000 | -2.257260000 | 0.034190000  |
| C | -0.046650000 | -2.167450000 | 2.056490000  |
| H | 0.956550000  | -2.017010000 | 2.473810000  |
| H | -0.543410000 | -2.990070000 | 2.598330000  |
| H | 0.046520000  | -2.451480000 | 0.996090000  |
| C | -1.662640000 | 2.397850000  | 0.455090000  |
| H | -0.770690000 | 3.030530000  | 0.587220000  |
| H | -1.688320000 | 2.028450000  | -0.577590000 |
| H | -2.560430000 | 3.015290000  | 0.632820000  |

### Coord\_6

|   |              |              |              |
|---|--------------|--------------|--------------|
| C | 0.000000000  | 0.000000000  | 0.000000000  |
| C | 1.410300000  | 0.000000000  | 0.000000000  |
| C | -0.736870000 | 0.000000000  | -1.277210000 |
| C | -2.030030000 | -0.590510000 | -1.393590000 |
| C | -0.161760000 | 0.572400000  | -2.445700000 |
| C | -2.747690000 | -0.481820000 | -2.585040000 |
| C | -0.912370000 | 0.661550000  | -3.627400000 |
| C | -2.210380000 | 0.173170000  | -3.690980000 |
| H | -2.798750000 | 0.272270000  | -4.611370000 |
| C | 2.162920000  | -1.258890000 | -0.199370000 |
| C | 1.487970000  | -2.326230000 | -0.818330000 |
| C | 3.550160000  | -1.348530000 | -0.005810000 |
| C | 2.163160000  | -3.486120000 | -1.164470000 |
| H | 0.418440000  | -2.233750000 | -1.042660000 |
| C | 4.242890000  | -2.492520000 | -0.373720000 |
| H | 4.095780000  | -0.501890000 | 0.422490000  |
| C | 3.533610000  | -3.600510000 | -0.938540000 |
| H | 1.617740000  | -4.318560000 | -1.629710000 |
| H | 4.066200000  | -4.513730000 | -1.221470000 |
| C | -0.847220000 | 0.139520000  | 1.224870000  |
| C | -0.877930000 | -0.867350000 | 2.214150000  |
| C | -1.598250000 | 1.322040000  | 1.409320000  |
| C | -1.640440000 | -0.673990000 | 3.379520000  |

|   |              |              |              |
|---|--------------|--------------|--------------|
| C | -2.343260000 | 1.495600000  | 2.589020000  |
| C | -2.359210000 | 0.502300000  | 3.570170000  |
| H | -1.654520000 | -1.455760000 | 4.146540000  |
| H | -2.945260000 | 0.645180000  | 4.486410000  |
| C | 1.773900000  | 1.030770000  | 1.056100000  |
| C | 1.665250000  | 2.387610000  | 0.712740000  |
| C | 2.346580000  | 0.669360000  | 2.287940000  |
| C | 2.121800000  | 3.359070000  | 1.587600000  |
| H | 1.222140000  | 2.672000000  | -0.244850000 |
| C | 2.799430000  | 1.647220000  | 3.156740000  |
| H | 2.426060000  | -0.387810000 | 2.557550000  |
| C | 2.690200000  | 3.000620000  | 2.810100000  |
| H | 2.039500000  | 4.419160000  | 1.318600000  |
| H | 3.041870000  | 3.773470000  | 3.502310000  |
| H | -0.461210000 | 1.117420000  | -4.513360000 |
| H | -2.918120000 | 2.417030000  | 2.731430000  |
| H | -3.748040000 | -0.921990000 | -2.657850000 |
| H | 5.328130000  | -2.548770000 | -0.212800000 |
| H | 3.244130000  | 1.364750000  | 4.117840000  |
| C | 1.248840000  | 1.064810000  | -2.507080000 |
| H | 1.826020000  | 0.348730000  | -3.114260000 |
| H | 1.277650000  | 2.046330000  | -3.012230000 |
| H | 1.644040000  | 1.128110000  | -1.481590000 |
| C | -2.666190000 | -1.410020000 | -0.313740000 |
| H | -3.070140000 | -0.752260000 | 0.462360000  |
| H | -3.489810000 | -2.012500000 | -0.734280000 |
| H | -1.931050000 | -2.092580000 | 0.130940000  |
| C | -0.151040000 | -2.163320000 | 2.066020000  |
| H | 0.867930000  | -2.048260000 | 2.454060000  |
| H | -0.667410000 | -2.953990000 | 2.636410000  |
| H | -0.098610000 | -2.471870000 | 1.009220000  |
| C | -1.614070000 | 2.439350000  | 0.415760000  |
| H | -0.767330000 | 3.115720000  | 0.611830000  |
| H | -1.540160000 | 2.065970000  | -0.613270000 |
| H | -2.552500000 | 3.012470000  | 0.516560000  |

### Coord\_7

|   |              |              |              |
|---|--------------|--------------|--------------|
| C | 0.000000000  | 0.000000000  | 0.000000000  |
| C | 1.419760000  | 0.000000000  | 0.000000000  |
| C | -0.726220000 | 0.000000000  | -1.281570000 |
| C | -2.068730000 | -0.480130000 | -1.385060000 |
| C | -0.093670000 | 0.445790000  | -2.478000000 |
| C | -2.766750000 | -0.363860000 | -2.585720000 |
| C | -0.828630000 | 0.544450000  | -3.668310000 |
| C | -2.167970000 | 0.184390000  | -3.718260000 |
| H | -2.742240000 | 0.294790000  | -4.646250000 |
| C | 2.161110000  | -1.277090000 | 0.118190000  |
| C | 1.565670000  | -2.411950000 | -0.462590000 |
| C | 3.504450000  | -1.349080000 | 0.518490000  |

|   |              |              |              |
|---|--------------|--------------|--------------|
| C | 2.258000000  | -3.609780000 | -0.556530000 |
| H | 0.544940000  | -2.344500000 | -0.859390000 |
| C | 4.216800000  | -2.534920000 | 0.403610000  |
| H | 4.006100000  | -0.457030000 | 0.906290000  |
| C | 3.576750000  | -3.700090000 | -0.115230000 |
| H | 1.768950000  | -4.491550000 | -0.993340000 |
| H | 4.124910000  | -4.643540000 | -0.200290000 |
| C | -0.860400000 | 0.165390000  | 1.215580000  |
| C | -0.924970000 | -0.828950000 | 2.216060000  |
| C | -1.574330000 | 1.373700000  | 1.384230000  |
| C | -1.676320000 | -0.594200000 | 3.381470000  |
| C | -2.305960000 | 1.588760000  | 2.566380000  |
| C | -2.350080000 | 0.610560000  | 3.561080000  |
| H | -1.714920000 | -1.365720000 | 4.157670000  |
| H | -2.924710000 | 0.786510000  | 4.478780000  |
| C | 1.691100000  | 1.170910000  | 0.943140000  |
| C | 1.667180000  | 2.462990000  | 0.394050000  |
| C | 2.121930000  | 0.990400000  | 2.270290000  |
| C | 2.068430000  | 3.544800000  | 1.157120000  |
| H | 1.336010000  | 2.607760000  | -0.637090000 |
| C | 2.521730000  | 2.077790000  | 3.025170000  |
| H | 2.131840000  | -0.014520000 | 2.702370000  |
| C | 2.499450000  | 3.364500000  | 2.472330000  |
| H | 2.052580000  | 4.553910000  | 0.726960000  |
| H | 2.806750000  | 4.225700000  | 3.075280000  |
| H | -0.330960000 | 0.903650000  | -4.573150000 |
| H | -2.848680000 | 2.530840000  | 2.697810000  |
| H | -3.802260000 | -0.715050000 | -2.647460000 |
| H | 5.265960000  | -2.574260000 | 0.727560000  |
| H | 2.857430000  | 1.935260000  | 4.058870000  |
| C | 1.359360000  | 0.789470000  | -2.559710000 |
| H | 1.850560000  | 0.007640000  | -3.162330000 |
| H | 1.482130000  | 1.753120000  | -3.085450000 |
| H | 1.759900000  | 0.825980000  | -1.534720000 |
| C | -2.787940000 | -1.200470000 | -0.285860000 |
| H | -3.171310000 | -0.479390000 | 0.442290000  |
| H | -3.636730000 | -1.769170000 | -0.703740000 |
| H | -2.114880000 | -1.905350000 | 0.215900000  |
| C | -0.256420000 | -2.156100000 | 2.074210000  |
| H | 0.775900000  | -2.078230000 | 2.433770000  |
| H | -0.790500000 | -2.914460000 | 2.671580000  |
| H | -0.245310000 | -2.485590000 | 1.022020000  |
| C | -1.565330000 | 2.478920000  | 0.377210000  |
| H | -0.771560000 | 3.198460000  | 0.631420000  |
| H | -1.392780000 | 2.105490000  | -0.640060000 |
| H | -2.536680000 | 3.003990000  | 0.398790000  |

Coord\_8

|   |             |             |             |
|---|-------------|-------------|-------------|
| C | 0.000000000 | 0.000000000 | 0.000000000 |
|---|-------------|-------------|-------------|



|   |              |              |              |
|---|--------------|--------------|--------------|
| C | 1.429210000  | 0.000000000  | 0.000000000  |
| C | -0.715540000 | 0.000000000  | -1.285850000 |
| C | -2.097680000 | -0.364670000 | -1.382800000 |
| C | -0.038000000 | 0.313390000  | -2.502200000 |
| C | -2.774840000 | -0.241990000 | -2.593030000 |
| C | -0.755940000 | 0.421070000  | -3.701660000 |
| C | -2.123810000 | 0.193940000  | -3.745920000 |
| H | -2.682130000 | 0.315090000  | -4.682270000 |
| C | 2.159220000  | -1.215840000 | 0.432320000  |
| C | 1.686830000  | -2.438270000 | -0.081660000 |
| C | 3.432050000  | -1.188900000 | 1.023270000  |
| C | 2.410350000  | -3.610600000 | 0.082660000  |
| H | 0.738060000  | -2.462540000 | -0.633260000 |
| C | 4.175240000  | -2.353540000 | 1.168340000  |
| H | 3.860070000  | -0.237560000 | 1.354000000  |
| C | 3.649500000  | -3.592200000 | 0.719790000  |
| H | 2.011520000  | -4.558540000 | -0.305220000 |
| H | 4.224520000  | -4.516010000 | 0.837700000  |
| C | -0.873530000 | 0.190900000  | 1.205610000  |
| C | -0.971830000 | -0.790320000 | 2.216480000  |
| C | -1.549910000 | 1.423340000  | 1.358930000  |
| C | -1.711190000 | -0.515600000 | 3.381220000  |
| C | -2.267040000 | 1.678250000  | 2.542960000  |
| C | -2.339240000 | 0.715580000  | 3.549890000  |
| H | -1.774150000 | -1.276510000 | 4.165940000  |
| H | -2.901730000 | 0.923300000  | 4.468460000  |
| C | 1.606240000  | 1.293600000  | 0.808510000  |
| C | 1.673840000  | 2.494940000  | 0.084240000  |
| C | 1.888300000  | 1.303300000  | 2.188130000  |
| C | 2.020560000  | 3.669280000  | 0.724840000  |
| H | 1.459690000  | 2.493360000  | -0.987060000 |
| C | 2.235670000  | 2.482170000  | 2.818780000  |
| H | 1.823030000  | 0.371670000  | 2.757830000  |
| C | 2.307860000  | 3.675380000  | 2.091390000  |
| H | 2.076570000  | 4.606990000  | 0.157550000  |
| H | 2.571410000  | 4.610730000  | 2.596190000  |
| H | -0.221190000 | 0.679110000  | -4.619280000 |
| H | -2.777200000 | 2.639530000  | 2.663720000  |
| H | -3.837440000 | -0.500570000 | -2.648850000 |
| H | 5.166190000  | -2.311940000 | 1.641580000  |
| H | 2.457260000  | 2.486320000  | 3.892430000  |
| C | 1.442390000  | 0.502950000  | -2.595020000 |
| H | 1.843030000  | -0.334290000 | -3.191130000 |
| H | 1.659930000  | 1.439800000  | -3.138930000 |
| H | 1.840710000  | 0.510760000  | -1.568280000 |
| C | -2.892470000 | -0.978250000 | -0.270050000 |
| H | -3.249280000 | -0.196860000 | 0.406870000  |
| H | -3.764440000 | -1.512530000 | -0.686010000 |
| H | -2.283690000 | -1.697220000 | 0.288260000  |
| C | -0.362600000 | -2.145820000 | 2.080880000  |

|   |             |             |             |
|---|-------------|-------------|-------------|
| H | 0.68060000  | -2.10670000 | 2.41280000  |
| H | -0.91257000 | -2.87172000 | 2.70368000  |
| H | -0.39316000 | -2.49264000 | 1.03418000  |
| C | -1.51648000 | 2.51661000  | 0.33953000  |
| H | -0.78289000 | 3.27831000  | 0.64556000  |
| H | -1.24709000 | 2.14740000  | -0.65819000 |
| H | -2.51268000 | 2.99011000  | 0.28040000  |

### Coord\_9

|   |             |             |             |
|---|-------------|-------------|-------------|
| C | 0.00000000  | 0.00000000  | 0.00000000  |
| C | 1.43867000  | 0.00000000  | 0.00000000  |
| C | -0.70484000 | 0.00000000  | -1.29003000 |
| C | -2.11632000 | -0.24531000 | -1.38679000 |
| C | 0.00458000  | 0.17691000  | -2.51835000 |
| C | -2.77152000 | -0.11755000 | -2.60686000 |
| C | -0.69500000 | 0.29291000  | -3.72742000 |
| C | -2.07802000 | 0.20157000  | -3.77384000 |
| H | -2.61858000 | 0.33264000  | -4.71924000 |
| C | 2.15725000  | -1.07800000 | 0.72330000  |
| C | 1.84627000  | -2.39071000 | 0.31876000  |
| C | 3.33492000  | -0.88182000 | 1.46133000  |
| C | 2.61290000  | -3.47104000 | 0.73340000  |
| H | 0.99037000  | -2.56232000 | -0.34764000 |
| C | 4.11832000  | -1.95942000 | 1.85851000  |
| H | 3.66234000  | 0.13274000  | 1.70825000  |
| C | 3.74681000  | -3.27190000 | 1.51832000  |
| H | 2.33442000  | -4.48935000 | 0.42646000  |
| H | 4.35812000  | -4.12352000 | 1.83326000  |
| C | -0.88662000 | 0.21603000  | 1.19498000  |
| C | -1.01849000 | -0.75150000 | 2.21539000  |
| C | -1.52506000 | 1.47095000  | 1.33352000  |
| C | -1.74509000 | -0.43829000 | 3.37885000  |
| C | -2.22667000 | 1.76403000  | 2.51894000  |
| C | -2.32686000 | 0.81724000  | 3.53678000  |
| H | -1.83224000 | -1.18826000 | 4.17143000  |
| H | -2.87653000 | 1.05539000  | 4.45570000  |
| C | 1.51969000  | 1.39524000  | 0.65539000  |
| C | 1.68267000  | 2.48926000  | -0.21048000 |
| C | 1.64834000  | 1.59429000  | 2.04476000  |
| C | 1.97490000  | 3.73796000  | 0.30047000  |
| H | 1.58875000  | 2.34254000  | -1.28885000 |
| C | 1.94321000  | 2.84638000  | 2.54424000  |
| H | 1.50465000  | 0.74935000  | 2.72462000  |
| C | 2.11427000  | 3.92903000  | 1.67745000  |
| H | 2.10589000  | 4.59124000  | -0.37753000 |
| H | 2.33416000  | 4.92395000  | 2.07804000  |
| H | -0.13310000 | 0.44660000  | -4.65173000 |
| H | -2.70391000 | 2.74305000  | 2.62941000  |
| H | -3.85276000 | -0.28093000 | -2.66188000 |

|   |              |              |              |
|---|--------------|--------------|--------------|
| H | 5.030510000  | -1.782000000 | 2.445470000  |
| H | 2.047250000  | 2.996260000  | 3.625370000  |
| C | 1.496600000  | 0.209080000  | -2.613140000 |
| H | 1.803400000  | -0.672760000 | -3.201520000 |
| H | 1.808730000  | 1.109900000  | -3.172290000 |
| H | 1.884820000  | 0.187690000  | -1.582470000 |
| C | -2.978430000 | -0.745390000 | -0.266490000 |
| H | -3.302760000 | 0.092600000  | 0.356140000  |
| H | -3.871660000 | -1.244690000 | -0.681170000 |
| H | -2.435350000 | -1.470050000 | 0.347330000  |
| C | -0.469380000 | -2.132510000 | 2.085890000  |
| H | 0.582180000  | -2.133460000 | 2.391000000  |
| H | -1.033460000 | -2.826020000 | 2.732580000  |
| H | -0.541780000 | -2.493030000 | 1.045420000  |
| C | -1.467600000 | 2.552500000  | 0.302800000  |
| H | -0.800780000 | 3.354800000  | 0.653860000  |
| H | -1.103940000 | 2.191990000  | -0.667960000 |
| H | -2.480280000 | 2.971140000  | 0.162270000  |

#### Coord\_10

|   |              |              |              |
|---|--------------|--------------|--------------|
| C | 0.000000000  | 0.000000000  | 0.000000000  |
| C | 1.448130000  | 0.000000000  | 0.000000000  |
| C | -0.694120000 | 0.000000000  | -1.294130000 |
| C | -2.124220000 | -0.123280000 | -1.396970000 |
| C | 0.033570000  | 0.038140000  | -2.526570000 |
| C | -2.756490000 | 0.008050000  | -2.627050000 |
| C | -0.646340000 | 0.161520000  | -3.745670000 |
| C | -2.030760000 | 0.207070000  | -3.801900000 |
| H | -2.551800000 | 0.346900000  | -4.756960000 |
| C | 2.155200000  | -0.871280000 | 0.972660000  |
| C | 2.036950000  | -2.253210000 | 0.724110000  |
| C | 3.215760000  | -0.455470000 | 1.792680000  |
| C | 2.855250000  | -3.174490000 | 1.364620000  |
| H | 1.291990000  | -2.609560000 | -0.000660000 |
| C | 4.046150000  | -1.380550000 | 2.417410000  |
| H | 3.419300000  | 0.611530000  | 1.924730000  |
| C | 3.861120000  | -2.744420000 | 2.227480000  |
| H | 2.722090000  | -4.249440000 | 1.174640000  |
| H | 4.515310000  | -3.470690000 | 2.720300000  |
| C | -0.899680000 | 0.240760000  | 1.183680000  |
| C | -1.064920000 | -0.712570000 | 2.212790000  |
| C | -1.499880000 | 1.516550000  | 1.308090000  |
| C | -1.778080000 | -0.362370000 | 3.374420000  |
| C | -2.185020000 | 1.846010000  | 2.494500000  |
| C | -2.313070000 | 0.915450000  | 3.521940000  |
| H | -1.889230000 | -1.101130000 | 4.174190000  |
| H | -2.849350000 | 1.182650000  | 4.440760000  |
| C | 1.431820000  | 1.472860000  | 0.487560000  |
| C | 1.690990000  | 2.452250000  | -0.485890000 |

|   |              |              |              |
|---|--------------|--------------|--------------|
| C | 1.404780000  | 1.850820000  | 1.846400000  |
| C | 1.927980000  | 3.757350000  | -0.108630000 |
| H | 1.718650000  | 2.169020000  | -1.540370000 |
| C | 1.646310000  | 3.158110000  | 2.210840000  |
| H | 1.181880000  | 1.098320000  | 2.608590000  |
| C | 1.917400000  | 4.122910000  | 1.240540000  |
| H | 2.134660000  | 4.520480000  | -0.870550000 |
| H | 2.093120000  | 5.162890000  | 1.533410000  |
| H | -0.067610000 | 0.208990000  | -4.670690000 |
| H | -2.629070000 | 2.841360000  | 2.595130000  |
| H | -3.847610000 | -0.058550000 | -2.686260000 |
| H | 4.861240000  | -1.028720000 | 3.065770000  |
| H | 1.631150000  | 3.445580000  | 3.268920000  |
| C | 1.521010000  | -0.088220000 | -2.614430000 |
| H | 1.732070000  | -1.003630000 | -3.194580000 |
| H | 1.926520000  | 0.767220000  | -3.185440000 |
| H | 1.891180000  | -0.137850000 | -1.577840000 |
| C | -3.044630000 | -0.504030000 | -0.275240000 |
| H | -3.330690000 | 0.386120000  | 0.290310000  |
| H | -3.957320000 | -0.967850000 | -0.689120000 |
| H | -2.567890000 | -1.225940000 | 0.392580000  |
| C | -0.576600000 | -2.116230000 | 2.089100000  |
| H | 0.480820000  | -2.158320000 | 2.368190000  |
| H | -1.153080000 | -2.777590000 | 2.758190000  |
| H | -0.690760000 | -2.486830000 | 1.055450000  |
| C | -1.418750000 | 2.586650000  | 0.267120000  |
| H | -0.824660000 | 3.427440000  | 0.656010000  |
| H | -0.964150000 | 2.239560000  | -0.669750000 |
| H | -2.439320000 | 2.947460000  | 0.045300000  |
